# Supplementary material for: Windborne migration amplifies insect-mediated pollination services
Source: eLife. 2022 Apr 13;11:e76230. doi: 10.7554/eLife.76230 (PMC9042232; doi:10.7554/eLife.76230)
Supplement: Figure 1—source data 1. [file elife-76230-fig1-data1.xlsx]

## Sheet: Sheet1
Date\Year	食蚜蝇
	2003	2004	2005	2006	2007	2008	2009	2010	2011	2012	2013	2014	2015	2016	2017	2018		average		average
2012-04-01
2012-04-02															0		0	0		0
2012-04-03										0	0	0	0	0	0		0	0		0
2012-04-04										0	0	0			0		0	0		0
2012-04-05										0	0			0	0		0	0		0
2012-04-06										0			0	0	0		0	0		0
2012-04-07										0		0	0	0	0		0	0		0
2012-04-08										0	0	0		0	0		0	0		0
2012-04-09										0	0	0		0	0		0	0		0
2012-04-10											0	0	0	0	0		0	0		0
2012-04-11										0	0	0	0	0	0	0	0	0		0
2012-04-12										0	0	0	0	0	0	0	0	0		0
2012-04-13										0		0	0	0	0	0	0	0		0
2012-04-14										0		0	0	0	0	0	0	0		0
2012-04-15										0		0	0	0	0	0	0	0		0
2012-04-16										0	0	0	0	0	0	0	0	0		0
2012-04-17											0	0	0	0	0	0	0	0		0
2012-04-18										0	0		0	0	0	0	0	0		0
2012-04-19										0	0	0	0	0	0	0	0	0		0
2012-04-20					0					0		0	0	0	0	0	0	0		0
2012-04-21					0					0	0	0	0	0	0	0	0	0		0
2012-04-22					0					0	0	0	0		0	0	0	0		0
2012-04-23					0					0	0	0	0		0	0	0	0		0
2012-04-24					0					0	0	0	0	0	0	0	0	0		0
2012-04-25					0							0	0	0	0	0	0	0		0
2012-04-26					0				0	0		0	0	0	0	0	0	0		0
2012-04-27					0				0	0	0	0	0	0	0	0	0	0		0
2012-04-28					0		0		0		0	0	2	0	0	0	2	0.222222		0.222222
2012-04-29					0		0		0	0	0	0	3	0	0	0	3	0.3		0.3
2012-04-30					0		0			0	0	0		2	0	0	2	0.25		0.25
2012-05-01					0		0			0	0	13		0	0	0	13	1.625		1.625
2012-05-02					2		0	0	0	1	7	0		0	0	0	10	1		1
2012-05-03					0		0	0	1	0		0	2	0	0	0	3	0.3		0.3
2012-05-04					1		0	0		0	4	0	2	0	0	1	8	0.8		0.8
2012-05-05					1		2	0		0	0		0	23	0	1	27	3		3
2012-05-06					0		0	0	7	0	0	9	17	0	0	0	33	3		3
2012-05-07					0	0	0	0	10	0	0	4	0	0	0	0	14	1.16667		1.16667
2012-05-08			0	0	0	0	0	0	0	0	0	0	0	0	0	0	0	0		0
2012-05-09	0		0	0	0	0	0	0	0	0		0	0		0	0	0	0		0
2012-05-10	0		0	0	0	0	0	0	0	33		0	1		0	0	34	2.61538		2.61538
2012-05-11	0		0	0	4	0	0	0	0	0	0			0	0	0	4	0.307692		0.307692
2012-05-12	0		0	0	1	0	0	0		0	0	0	0	0	0	0	1	0.0714286		0.0714286
2012-05-13	0	0	3	0	0	0	0	0		0		13	0	2	0	8	26	1.85714		1.85714
2012-05-14	0	10	25	0	0	0	0	0	0	0	0	0	15	0	0	1	51	3.1875		3.1875
2012-05-15	0	350	0	0	0	0	0	0	0	0	0	8	0	2	0	0	360	22.5		22.5
2012-05-16	0	0	0	0	0	0	0	0	0	0	0	18	0	1	0	0	19	1.1875		1.1875
2012-05-17	0	0	0	16	0	2	0	0	0	0	0	1	0	2	0	0	21	1.3125		1.3125
2012-05-18	0	0	0	24	0	0	0	0	357	0	0	9	4	1	0	0	395	24.6875		24.6875
2012-05-19	0	0	15	172	0	0	8	0	11	0	3	3	4	1	0	0	217	13.5625		13.5625
2012-05-20	0	0	0	12	79	0	0	0		0	0	23	0	0	0	0	114	7.6		7.6
2012-05-21	0	0	0	0	1	3	0	1	0	0	10	1018	0	3	0	0	1036	64.75		64.75
2012-05-22	0	0	0	0	0	105	1	0	1	0	0	27	1	0		0	135	9		9
2012-05-23	0	0	0	11	0	4	39	0	5	185	0	3	31	1	1	1	281	17.5625		17.5625
2012-05-24	0	18	30	1	2	248	31	0	14	0	0	74	14	0	5	0	437	27.3125		27.3125
2012-05-25	0	28	3	0	0	20	204	0	5	0	0	0	8	1	0	0	269	16.8125		16.8125
2012-05-26	0	0	84	0	0	25	3536	0	0	3		0	19	3	386	0	4056	270.4		270.4
2012-05-27	0	0	0	2	0	3	8	0	2	50		2	59	65	114	11	316	21.0667		21.0667
2012-05-28	0	13	0	0	1	0	688	0	10	0	0	2	8	0	17	0	739	46.1875		46.1875
2012-05-29	0	56	0	19	0	0	10	0	1	8	0	426	4	0	5	0	529	33.0625		33.0625
2012-05-30	0	2	15	23	23	0	4	48		0	2	10	3	49	0	0	179	11.9333		11.9333
2012-05-31	0	1	0	28	1	0	0	3	5	2	0	16	3	32	2	0	93	5.8125		5.8125
2012-06-01	10	8	4	2	0	0	0	220		0	24	0	0	0	0	6	274	18.2667		18.2667
2012-06-02	8	0	0	4	0	0	70	8		8	0	3	28	7	8	1	145	9.66667		9.66667
2012-06-03	40	3	0	265	2	10	0	0	13	0	129	5	18	4	2	0	491	30.6875		30.6875
2012-06-04	50	0	0	26	0		0	33	8	0	1	31	6	0	7	0	162	10.8		10.8
2012-06-05	45	0	13	0	0	4	7	25	22	330	0	3	0	0	0	0	449	28.0625		28.0625
2012-06-06	27	0	49	11	0		0	72	112	0	1	2	2	7		0	283	20.2143		20.2143
2012-06-07	136	51	2	0	0	134	0	9	13	0	0	0	67	548	0	0	960	60		60
2012-06-08	0	0	2	0	0	2	0	1	14	0	1	0	1	0	0	1	22	1.375		1.375
2012-06-09	0	0	1	0	0	2	0	8	10	0	0	4	4	23	0	0	52	3.25		3.25
2012-06-10	0	0	9	0	0	116	0	0	0	11	0	2	0	0	2	0	140	8.75		8.75
2012-06-11	0	0	24	0	0	6	0	0	0	0	0	0	3	0	2	0	35	2.1875		2.1875
2012-06-12	15	0	0	0	0	6	0	0	0	37	4	2	3	0	2	0	69	4.3125		4.3125
2012-06-13	0	0	0	0	0	0	0	5	0	0	6	0	4	0	0	0	15	0.9375		0.9375
2012-06-14	0	0	3	0	2	0	0	96	0		0	4	7		0	0	112	8		8
2012-06-15	0	0	5	0	0	33	0	66	0	1	0	13	9	0	0	0	127	7.9375		7.9375
2012-06-16	0	0	0	0	0		0	23	0	0	16	1	7	3	0	0	50	3.33333		3.33333
2012-06-17	0	0	0	0	0		0	0	3	0	0	0	5	0	0	0	8	0.533333		0.533333
2012-06-18	10	0	0	0	0		0	0	0	1	0	0	3	4	0	0	18	1.2		1.2
2012-06-19	0	0	0	0	0	0	0	1	0	2	1	7	1	1	0	0	13	0.8125		0.8125
2012-06-20	0	0	0	0	0	0	0	2	0	4	0	0	4	0	0	0	10	0.625		0.625
2012-06-21	0	2	0	0	1		0	2	0	2	0	9	1	2	0	0	19	1.26667		1.26667
2012-06-22	0	0	0	0	0	0	0	1		0	1	4	0	0	0	0	6	0.4		0.4
2012-06-23	0	0	0	0	0	0	0	0	0	0	1	4	0	1	0	0	6	0.375		0.375
2012-06-24	0	0	0	0	0	0	0	1	0	1	0	2	0	0	0	0	4	0.25		0.25
2012-06-25	11	0	0	0	0	0	0	0	0	0	0	0	0	0	0	0	11	0.6875		0.6875
2012-06-26	0	2	0	0	0	0	0	2	0	0	0	0	4	0	0	0	8	0.5		0.5
2012-06-27	0	0	0	0	0	0	0	2	0	1	0	0	2	0	0	0	5	0.3125		0.3125
2012-06-28	25	0	0	0	0	0	0	0	0	0	1	5	1	0	0	0	32	2		2
2012-06-29	0	1	1	0	16	0	0	0	1		0	84	0	0	0	0	103	6.86667		6.86667
2012-06-30	0	0	5	0	0	0	0	0	0	0	0		0	0	0	0	5	0.333333		0.333333
2012-07-01	0	0	0	0	0	0	0	0		1	0	0	2	34	0	0	37	2.46667		2.46667
2012-07-02	0	0	0	7	0	0	0	0	0	1	0	3	0	0	0	0	11	0.6875		0.6875
2012-07-03	0	0	0	0	0	0	0	0	0	0	4	0	0	6	0	0	10	0.625		0.625
2012-07-04	0	0	0	0	8	0	0	0	1	0	0	0	0	0	0	4	13	0.8125		0.8125
2012-07-05	0	0	0	0	0		0	1	6		0	0	0	2	0	0	9	0.642857		0.642857
2012-07-06	0	0	0	0	0	0	0	0	0	5	0	3	0	0	0	0	8	0.5		0.5
2012-07-07	0	0	0	1	0	0	0	1	0	2	0	0	0	2	0	0	6	0.375		0.375
2012-07-08	0	6	0	0	0	0	0	1	0	0	0	0	1	0	0	0	8	0.5		0.5
2012-07-09	0	0	0	0	0	0	0	2	0	0		2	1	2	1	0	8	0.533333		0.533333
2012-07-10	0	1	0	0	0	0	0	0	0	0		0	0	0	0	0	1	0.0666667		0.0666667
2012-07-11	0	0	4	0	0	0	0	0	0	0	2	2	1	0	0	0	9	0.5625		0.5625
2012-07-12	0	0	0	1	0	0	0	0	0	1	2	0	1	0	0	0	5	0.3125		0.3125
2012-07-13	0	0	1	0	0	3	0	1	0	0	0	0	0	0	0	0	5	0.3125		0.3125
2012-07-14	1	0	0	0	1	0	0	1	0	0	0	0	35	0	0	0	38	2.375		2.375
2012-07-15	0	1	0	0	0		0	0	1	19	0	0	184	3	0	0	208	13.8667		13.8667
2012-07-16	0	0	0	0	0	0	0	0	0	0	1	0	1	0	0	0	2	0.125		0.125
2012-07-17	0	0	0	0	0	1	0	0	1	1	0	0	0	0	0	0	3	0.1875		0.1875
2012-07-18	0	0	0	0	0	0	0	0	0	0	0	0	0		0	0	0	0		0
2012-07-19	0	0	0	0	0	0	0	0	1	0	0	0	0	0	0	0	1	0.0625		0.0625
2012-07-20	0	0	0	0	0	0	1	0	0	0	0	0	0	0	0	0	1	0.0625		0.0625
2012-07-21	0	0	0	0	0	0	0	0	0	0	1	0	0	2	0	0	3	0.1875		0.1875
2012-07-22	0	0	1	0	0	0	0	0	0		0	1	1	0	0	0	3	0.2		0.2
2012-07-23	0	0	2	0	0	0	0	0	0	0	0	0	0		0	0	2	0.133333		0.133333
2012-07-24	0	0	0	0	0		0	0	0	0	0	0	0	0	0	0	0	0		0
2012-07-25	0	0	0	0	0	0	0	0	0	0	0	0	0		0	0	0	0		0
2012-07-26	0		0	0	0	0	0	0	0	0	1	0	1	0	0	0	2	0.133333		0.133333
2012-07-27	0	0	0	0	0	0	0		0	0	0	1	1	0	0	0	2	0.133333		0.133333
2012-07-28	0	0	0	0	0	0	0		0	0	0	0	0	0	0	0	0	0		0
2012-07-29	0	0	5	0	0	0	0	0	0	0	0	0	0	0	0	0	5	0.3125		0.3125
2012-07-30	0	0	0	0	0	0	0	0	0	0	0	0	0		0	12	12	0.8		0.8
2012-07-31	0	0	0	0	0	0	0	0	6	0	1	0	0	0	0	4	11	0.6875		0.6875
2012-08-01	0	0	0	0	0	0	0	0	0		0	0	0	0	0	0	0	0		0
2012-08-02	0	0	0	0	0	0	0	0	0	0	0	0	0	8	0	0	8	0.5		0.5
2012-08-03	1	0	0	0	0	3	0	0	3	0	0	1	0	0	0	0	8	0.5		0.5
2012-08-04	0	0	0	0	0	0	0	0	0	0	0	0	0	0	0	0	0	0		0
2012-08-05	0	0	0	0	0	0	0	0	0	1	0	17	0	0	0	0	18	1.125		1.125
2012-08-06	6	0	0	0	0	0	0	0		0	0	19	1	0		0	26	1.85714		1.85714
2012-08-07	0	0	0	0	0		0	0		0	0	4	0		0	0	4	0.307692		0.307692
2012-08-08	0	0	0	0	0		0	0	0	0	2	0	1	0	0	0	3	0.2		0.2
2012-08-09	2	0	0	0	0	0	0	0	0	0	0	14	0	0	0	2	18	1.125		1.125
2012-08-10	0	0	0	0	0	0	0	0	0	13	0	11	3	0	0	8	35	2.1875		2.1875
2012-08-11	0	0	0	0	0	0	0	0	0	1	1		20	0	0	0	22	1.46667		1.46667
2012-08-12	0	0	0	0	0	0	0	0	0		0	0	9	0	0	0	9	0.6		0.6
2012-08-13	0	0	0	0	0	0	0	5	0	2	0	6	17	0		0	30	2		2
2012-08-14	0	0	0	0	1	0	0	0	0	0	0	9	0	3	0	0	13	0.8125		0.8125
2012-08-15	0	3	0	0	0		0	30	0	28	0	0	2	0	0	0	63	4.2		4.2
2012-08-16	0	0	0	0	0	0	0	1	0	14	0	1	5	6	0	0	27	1.6875		1.6875
2012-08-17	0	0	0	0	0		0	0	0	3	1	0	5	0	0	0	9	0.6		0.6
2012-08-18	0	0	0	0	0	0	0	0	0	0	1	24	1	0	0	0	26	1.625		1.625
2012-08-19	0	0	0	4	0	0	0	0	0	7	0	0	0	0	0	0	11	0.6875		0.6875
2012-08-20	0	0	0	0	0	3	0	0	0	104	0	0	0	0	0	0	107	6.6875		6.6875
2012-08-21	0	0	0	0	0	0	0	0	14	0	0	0	3	0	0	3	20	1.25		1.25
2012-08-22	0	0	0	183	44	7	2		81	0	1	23	12	0	0	0	353	23.5333		23.5333
2012-08-23	0	0	0	0	0	0	0	0	389	0	0	0	24			0	413	29.5		29.5
2012-08-24	1	23	0	3	0	3	19	0	0	3	8	0	304	0	0	0	364	22.75		22.75
2012-08-25	0	0	1	0	13	3	0	1	2	0	61	24	11		0	0	116	7.73333		7.73333
2012-08-26	0	2	0	0	0	0	0	0	1		0	0	20	0	4	0	27	1.8		1.8
2012-08-27	0	0	3	4	0	0	0	0	0	0	3	0	80	37	0	3	130	8.125		8.125
2012-08-28	0	0	2	0	34	4	0		0	0		0	48	28	0	0	116	8.28571		8.28571
2012-08-29	0	0	0	0	2	0	0	0	0	0		12	10	23	0	0	47	3.13333		3.13333
2012-08-30	0	0	36	3	6	31	24	11	0	0	0	1	15	17	0	0	144	9		9
2012-08-31	0	8	0	5	43		0	0	40	0	0		23	2	0	1	122	8.71429		8.71429
2012-09-01	0	0	0	0	185	132	0	0	0	0	11		0	0	0	5	333	22.2		22.2
2012-09-02	0	0	3	20	86	111	0	1431	0	1	2	0	9	0	46	0	1709	106.812		106.812
2012-09-03	0	0	0	0	0	6	0	0	0	0	0	0	5	2	0	14	27	1.6875		1.6875
2012-09-04	0	2	0	0	0		0	2	0	0	1	9	85	1	0	52	152	10.1333		10.1333
2012-09-05	0	2	3	2	44	0	0	129	0	0	0	1	20	5	0	3	209	13.0625		13.0625
2012-09-06	1	35	24	0	73	0	0	0	0	0	0	0	32	0	0	12	177	11.0625		11.0625
2012-09-07	0	0	270	0	9	28	0	0	0	0	4	0	0	0	0	25	336	21		21
2012-09-08	0	1	96	0	4	48	0	2	0	2	0	24	29	8	0	2	216	13.5		13.5
2012-09-09	4	3	0	0	0	0	0	0	1	86	0	34	5	0	0	5	138	8.625		8.625
2012-09-10	0	6	0	1	77	0	0	3	7	0	0	44	8	1	0	8	155	9.6875		9.6875
2012-09-11	0	0	0	0	0	0	0	89	0	0	14	24	9	0	0	2	138	8.625		8.625
2012-09-12	0	6	0	0	2	0	0	14	1	1	0	0	13	0	0	1	38	2.375		2.375
2012-09-13	0	0	0	5	0	0	0	11	0	1	2	8		11	0	0	38	2.53333		2.53333
2012-09-14	31	0	10	3	6	0	0	0	0	0	12	26	12	0	0	0	100	6.25		6.25
2012-09-15	0	0	0	3	3	0	3	0	11		3	0	18	0	0	0	41	2.73333		2.73333
2012-09-16	0	0	3	120	4	0	0	0	0		0	4	27	13	0	1	172	11.4667		11.4667
2012-09-17	0	0	2	68	1	0	0	0	0		1	15	16		0	27	130	9.28571		9.28571
2012-09-18	0	0	0	14	0	0	112	0	0	0	3	0	14		0	0	143	9.53333		9.53333
2012-09-19	0	0	0	8	0	11	0	0	6	0	0	0	23		0	0	48	3.2		3.2
2012-09-20	5	0	1	18	0	0	0	0	0	0	4	0	22	17	7	29	103	6.4375		6.4375
2012-09-21	4	4	0	10	0	1	185	0	11	0	0	0	24	5	0	8	252	15.75		15.75
2012-09-22	0	4	1	128	0	0	0	0	0	0	0	11	29	3	7	0	183	11.4375		11.4375
2012-09-23	0	2	0	2	0	0	0	0	0	0		0	31	0	0	9	44	2.93333		2.93333
2012-09-24	0	0	0	0	0	0	0	0	0	0		0	7	0	0	2	9	0.6		0.6
2012-09-25	0	1	5	0	1	0	0	0	0	0				0		60	67	5.58333		5.58333
2012-09-26	0	0	2	0	0	0	46	0	0	0	0			0		11	59	4.53846		4.53846
2012-09-27	0	14	0	2	0	0	0	0	0	0	7	1	12		0	11	47	3.13333		3.13333
2012-09-28	0	1	0	6	0	0	31	0	0		2	1	15		0	10	66	4.71429		4.71429
2012-09-29	0	2	0	6	0	3	37	0	0	0	25	0	13	0	0	0	86	5.375		5.375
2012-09-30	0	0	0	54	0	0	0	0	0	0	2	0	2	9	0	0	67	4.1875		4.1875
2012-10-01	0	0	0	2	0	0	0	0	0	0	4	0	14	7		0	27	1.8		1.8
2012-10-02	0	0	0	0	0	0	0	0	0	0	1	0	10	0		0	11	0.733333		0.733333
2012-10-03	0	0	0	49	26	0	0	0	0	1	2	0	7	6	0	0	91	5.6875		5.6875
2012-10-04	0	0	2	10	47	0	0	14	0	0	4	0		1	0	0	78	5.2		5.2
2012-10-05	0	0	0	5	0	0		0	0	0	1	0		0	0	0	6	0.428571		0.428571
2012-10-06	0	0	0	0	0	0		0	0	0	0		4	120	0	0	124	8.85714		8.85714
2012-10-07	0	0	0	0	0	0		0	0	0	0		3	4	0	0	7	0.5		0.5
2012-10-08	0	60	0	1	0	0		0	0	0		0	2	0		0	63	4.84615		4.84615
2012-10-09	0	0	0	0	0	0		0	0			0	0	0		0	0	0		0
2012-10-10	0	0	0	0	0	0		0	0	0	5	0	1	0		0	6	0.428571		0.428571
2012-10-11	0	11	0	1	1	0		0	0	0	0	0	0	1		0	14	1		1
2012-10-12	0	0	0	1	0	0		0	0	0	0	0	0	0		0	1	0.0714286		0.0714286
2012-10-13	0	0	0	20	0	0		2	0	0	0	0	6	0	0	0	28	1.86667		1.86667
2012-10-14	0	0	0	0	0	0		0	0	0	0	0	0	0	0	0	0	0		0
2012-10-15	0	40	0	1	0	0		0	0		0	0	0	2	0	0	43	3.07143		3.07143
2012-10-16	0	15	0	0	0	0		0	0		0	0		1	0	0	16	1.23077		1.23077
2012-10-17		0	0	3	0			0	0		0	0	1	5	0	0	9	0.75		0.75
2012-10-18		8	0	1	0			0	0				0	0	0	0	9	0.9		0.9
2012-10-19		0	0	0	0			0	0	0			0	12	0	0	12	1.09091		1.09091
2012-10-20		0	0	14	0			0	0	1		0	0	16	0	0	31	2.58333		2.58333
2012-10-21		0	0	0					0	0		0		10		0	10	1.25		1.25
2012-10-22		0	0	0					0		0	0				0	0	0		0
2012-10-23		0	0	0					0		0	0	0	147		0	147	16.3333		16.3333
2012-10-24			0						0	0	0	0	0		0	0	0	0		0
2012-10-25			0						0	0	0	0	0	6	0	0	6	0.666667		0.666667
2012-10-26			0						0	0	0	0	0	0	0	0	0	0		0
2012-10-27			0						0	0	0	0	0	1	0	0	1	0.111111		0.111111
2012-10-28			0						0	0	0		0	1	0	0	1	0.125		0.125
2012-10-29			0						0	0	0		0	0	0	0	0	0		0
2012-10-30			0						0	0	0	0	0	0	0	0	0	0		0
2012-10-31
sum	433	806	770	1405	858	1121	5068	2381	1208	979	412	2244	1751	1378	618	365
	115	159	153	156	168	158	156	163	150	172	159
										年平均
年际波动
历年总量
2003	433
2004	806
2005	770
2006	1405
2007	858
2008	1121
2009	5068
2010	2381
2011	1208
2012	979
2013	412
2014	2244
2015	1751
2016	1378
2017	618
2018	365

## Sheet: Sheet2
	433	806	770	1405	858	1121	5068	2381	1208	979	412	2244	1751	1378	618	365	1362.31
			433
			806
			770
			1405
			858
			1121
			5068
			2381
			1208
			979
			412			1362.31±1159.29
			2244
			1751
			1378
			618
			365
									365
									412
									433
									618
									770
									806
									858
									979
									1121
									1208
									1378
									1405
									1751
									2244
									2381
									5068

## Sheet: Sheet4
		01 Jun (10)	01 May (13)	13 May (3)	21 May (1)	28 Apr.(2)		365
			02 May (1)	14 May (10)	23 May (1)	30 Apr.(2)		412
			02 May (2)	17 May (16)				433
			02 May (7)	17 May (2)				618
			03 May (1)					770
			04 May (1)					806
			06 May (2)					858
								979
									2381
									2244
									1751		113
									1405		123
									1378		136
									1208		142
									1121		145
								5068			146
											148
											148
											151
											157
											158
										151.188	162
											163
											172
											173
											182
											17.9786
