# Supplementary material for: Windborne migration amplifies insect-mediated pollination services
Source: eLife. 2022 Apr 13;11:e76230. doi: 10.7554/eLife.76230 (PMC9042232; doi:10.7554/eLife.76230)
Supplement: Figure 6—figure supplement 1—source data 1. [file elife-76230-fig6-figsupp1-data1.xls]

## Sheet: Results
Block Type	384-Well Block
Calibration Background is expired	Yes
Calibration Background performed on	2016-09-03 00:15:34 AM PDT
Calibration FAM is expired	Yes
Calibration FAM performed on	2016-09-03 05:25:54 AM PDT
Calibration MELTDOCTOR is expired	Yes
Calibration MELTDOCTOR performed on	2016-09-03 02:14:43 AM PDT
Calibration NED is expired	Yes
Calibration NED performed on	2016-09-03 06:05:40 AM PDT
Calibration ROI is expired	Yes
Calibration ROI performed on	2016-09-03 00:05:14 AM PDT
Calibration ROX is expired	Yes
Calibration ROX performed on	2016-09-03 05:35:42 AM PDT
Calibration SYBR is expired	Yes
Calibration SYBR performed on	2016-09-03 05:14:14 AM PDT
Calibration TAMRA is expired	Yes
Calibration TAMRA performed on	2016-09-03 05:45:27 AM PDT
Calibration Uniformity is expired	Yes
Calibration Uniformity performed on	2016-09-03 00:54:59 AM PDT
Calibration VIC is expired	Yes
Calibration VIC performed on	2016-09-03 05:55:40 AM PDT
Chemistry	TAQMAN
Experiment Barcode	qiagen
Experiment Comments
Experiment File Name	D:\KeHu\2016 HuaDa\20190109 249-01\2019-01-19 249-01 dama.eds
Experiment Name	2019-01-19 249-01 dama
Experiment Run Start Time	2019-01-08 21:49:55 PM PST
Experiment Run Stop Time	2019-01-08 23:09:37 PM PST
Experiment Type	Standard Curve
Experiment User Name	tym
Instrument Name	278881326
Instrument Serial Number	278881326
Instrument Type	ViiA(TM) 7 System
Passive Reference	ROX
Quantification Cycle Method	Ct
Signal Smoothing On	true
Stage/ Cycle where Analysis is performed	Stage 2, Step 3
Well	Well Position	Omit	Sample Name	Target Name	Task	Reporter	Quencher	CT	Ct Mean	Ct SD	Quantity	Quantity Mean	Quantity SD
148	G4	FALSE		ITS2	STANDARD	FAM	NFQ-MGB	6.3317	6.49789	0.149222	22599999488	22599999488
172	H4	FALSE		ITS2	STANDARD	FAM	NFQ-MGB	6.4126	6.49789	0.149222	22599999488	22599999488
196	I4	FALSE		ITS2	STANDARD	FAM	NFQ-MGB	6.61159	6.49789	0.149222	22599999488	22599999488
220	J4	FALSE		ITS2	STANDARD	FAM	NFQ-MGB	6.63566	6.49789	0.149222	22599999488	22599999488
149	G5	FALSE		ITS2	STANDARD	FAM	NFQ-MGB	8.79088	8.96025	0.13159	2260000000	2260000000
173	H5	FALSE		ITS2	STANDARD	FAM	NFQ-MGB	9.01313	8.96025	0.13159	2260000000	2260000000
197	I5	FALSE		ITS2	STANDARD	FAM	NFQ-MGB	8.93578	8.96025	0.13159	2260000000	2260000000
221	J5	FALSE		ITS2	STANDARD	FAM	NFQ-MGB	9.10119	8.96025	0.13159	2260000000	2260000000
150	G6	FALSE		ITS2	STANDARD	FAM	NFQ-MGB	12.3878	12.5612	0.181178	226000000	226000000
174	H6	FALSE		ITS2	STANDARD	FAM	NFQ-MGB	12.5176	12.5612	0.181178	226000000	226000000
198	I6	FALSE		ITS2	STANDARD	FAM	NFQ-MGB	12.5229	12.5612	0.181178	226000000	226000000
222	J6	FALSE		ITS2	STANDARD	FAM	NFQ-MGB	12.8163	12.5612	0.181178	226000000	226000000
244	K4	FALSE		ITS2	STANDARD	FAM	NFQ-MGB	14.7565	14.8652	0.0874992	22600000	22600000
268	L4	FALSE		ITS2	STANDARD	FAM	NFQ-MGB	14.8366	14.8652	0.0874992	22600000	22600000
292	M4	FALSE		ITS2	STANDARD	FAM	NFQ-MGB	14.9125	14.8652	0.0874992	22600000	22600000
316	N4	FALSE		ITS2	STANDARD	FAM	NFQ-MGB	14.9552	14.8652	0.0874992	22600000	22600000
245	K5	FALSE		ITS2	STANDARD	FAM	NFQ-MGB	17.9987	18.0203	0.0893244	2260000	2260000
269	L5	FALSE		ITS2	STANDARD	FAM	NFQ-MGB	17.9184	18.0203	0.0893244	2260000	2260000
293	M5	FALSE		ITS2	STANDARD	FAM	NFQ-MGB	18.1343	18.0203	0.0893244	2260000	2260000
317	N5	FALSE		ITS2	STANDARD	FAM	NFQ-MGB	18.03	18.0203	0.0893244	2260000	2260000
246	K6	FALSE		ITS2	STANDARD	FAM	NFQ-MGB	21.2394	21.223	0.12138	226000	226000
270	L6	FALSE		ITS2	STANDARD	FAM	NFQ-MGB	21.2431	21.223	0.12138	226000	226000
294	M6	FALSE		ITS2	STANDARD	FAM	NFQ-MGB	21.3511	21.223	0.12138	226000	226000
318	N6	FALSE		ITS2	STANDARD	FAM	NFQ-MGB	21.0583	21.223	0.12138	226000	226000
340	O4	FALSE		ITS2	STANDARD	FAM	NFQ-MGB	24.6064	24.5893	0.304231	22600	22600
341	O5	FALSE		ITS2	STANDARD	FAM	NFQ-MGB	24.6147	24.5893	0.304231	22600	22600
342	O6	FALSE		ITS2	STANDARD	FAM	NFQ-MGB	24.1967	24.5893	0.304231	22600	22600
364	P4	FALSE		ITS2	STANDARD	FAM	NFQ-MGB	24.9395	24.5893	0.304231	22600	22600
7	A7	FALSE		ITS2	STANDARD	FAM	NFQ-MGB	28.0099	28.1336	0.150697	2260	2260
8	A8	FALSE		ITS2	STANDARD	FAM	NFQ-MGB	28.2531	28.1336	0.150697	2260	2260
9	A9	FALSE		ITS2	STANDARD	FAM	NFQ-MGB	28.2744	28.1336	0.150697	2260	2260
366	P6	FALSE		ITS2	STANDARD	FAM	NFQ-MGB	27.9968	28.1336	0.150697	2260	2260
1	A1	FALSE	D1	ITS2	UNKNOWN	FAM	NFQ-MGB	25.4291	25.4612	0.157124	11775.7	11549.6	1330.9		QPCR编号	Sample ID
2	A2	FALSE	D1	ITS2	UNKNOWN	FAM	NFQ-MGB	25.6318	25.4612	0.157124	10120.2	11549.6	1330.9		D1	D-0 120
3	A3	FALSE	D1	ITS2	UNKNOWN	FAM	NFQ-MGB	25.3225	25.4612	0.157124	12753	11549.6	1330.9		D2	D-0 180
25	B1	FALSE	D2	ITS2	UNKNOWN	FAM	NFQ-MGB	18.4203	18.7039	0.27281	2.22077e+06	1.82172e+06	374253		D3	D-0 349
26	B2	FALSE	D2	ITS2	UNKNOWN	FAM	NFQ-MGB	18.7269	18.7039	0.27281	1.76586e+06	1.82172e+06	374253		D4	D-24 292
27	B3	FALSE	D2	ITS2	UNKNOWN	FAM	NFQ-MGB	18.9645	18.7039	0.27281	1.47854e+06	1.82172e+06	374253		D5	D-24 486
49	C1	FALSE	D3	ITS2	UNKNOWN	FAM	NFQ-MGB	20.9414	20.9682	0.286409	337288	335624	70396.3		D6	D-24 187
50	C2	FALSE	D3	ITS2	UNKNOWN	FAM	NFQ-MGB	20.6961	20.9682	0.286409	405173	335624	70396.3		D7	D-48 2
51	C3	FALSE	D3	ITS2	UNKNOWN	FAM	NFQ-MGB	21.267	20.9682	0.286409	264410	335624	70396.3		D8	D-48 4
73	D1	FALSE	D4	ITS2	UNKNOWN	FAM	NFQ-MGB	21.7868	21.5949	0.267111	179275	209794	43772		D9	D-48 6
74	D2	FALSE	D4	ITS2	UNKNOWN	FAM	NFQ-MGB	21.2898	21.5949	0.267111	259945	209794	43772		D10	D-72 1
75	D3	FALSE	D4	ITS2	UNKNOWN	FAM	NFQ-MGB	21.708	21.5949	0.267111	190162	209794	43772		D11	D-72 2
97	E1	FALSE	D5	ITS2	UNKNOWN	FAM	NFQ-MGB	21.335	21.3559	0.122117	251320	248099	22367.1		D12	D-72 3
98	E2	FALSE	D5	ITS2	UNKNOWN	FAM	NFQ-MGB	21.2456	21.3559	0.122117	268681	248099	22367.1		D13	3d
99	E3	FALSE	D5	ITS2	UNKNOWN	FAM	NFQ-MGB	21.4871	21.3559	0.122117	224296	248099	22367.1		D14	3d
121	F1	FALSE	D6	ITS2	UNKNOWN	FAM	NFQ-MGB	27.4173	27.7197	0.267956	2663.91	2154.27	448.611		D15	4d
122	F2	FALSE	D6	ITS2	UNKNOWN	FAM	NFQ-MGB	27.8143	27.7197	0.267956	1979.8	2154.27	448.611		D16	4d
123	F3	FALSE	D6	ITS2	UNKNOWN	FAM	NFQ-MGB	27.9275	27.7197	0.267956	1819.11	2154.27	448.611		D17	4d
145	G1	FALSE	D7	ITS2	UNKNOWN	FAM	NFQ-MGB	21.1408	21.3513	0.197896	290588	250096	37465.9		D18	5d
146	G2	FALSE	D7	ITS2	UNKNOWN	FAM	NFQ-MGB	21.3798	21.3513	0.197896	243043	250096	37465.9		D19	5d
147	G3	FALSE	D7	ITS2	UNKNOWN	FAM	NFQ-MGB	21.5335	21.3513	0.197896	216658	250096	37465.9		D20	6d
169	H1	FALSE	D8	ITS2	UNKNOWN	FAM	NFQ-MGB	29.2905	29.7727	0.481654	656.641	477.947	169.448		D21	6d
170	H2	FALSE	D8	ITS2	UNKNOWN	FAM	NFQ-MGB	29.7736	29.7727	0.481654	457.621	477.947	169.448		D22	6d
171	H3	FALSE	D8	ITS2	UNKNOWN	FAM	NFQ-MGB	30.2539	29.7727	0.481654	319.578	477.947	169.448
193	I1	FALSE	D9	ITS2	UNKNOWN	FAM	NFQ-MGB	28.3995	28.9037	0.50705	1278.24	919.271	341.292
194	I2	FALSE	D9	ITS2	UNKNOWN	FAM	NFQ-MGB	28.8979	28.9037	0.50705	880.634	919.271	341.292
195	I3	FALSE	D9	ITS2	UNKNOWN	FAM	NFQ-MGB	29.4136	28.9037	0.50705	598.942	919.271	341.292
217	J1	FALSE	D10	ITS2	UNKNOWN	FAM	NFQ-MGB	28.3183	28.5261	0.288095	1358.29	1180.21	238.394
218	J2	FALSE	D10	ITS2	UNKNOWN	FAM	NFQ-MGB	28.4051	28.5261	0.288095	1272.96	1180.21	238.394
219	J3	FALSE	D10	ITS2	UNKNOWN	FAM	NFQ-MGB	28.855	28.5261	0.288095	909.381	1180.21	238.394
241	K1	FALSE	D11	ITS2	UNKNOWN	FAM	NFQ-MGB	32.6759	32.3463	0.377634	52.2664	68.713	20.0126
242	K2	FALSE	D11	ITS2	UNKNOWN	FAM	NFQ-MGB	31.9342	32.3463	0.377634	90.9946	68.713	20.0126
243	K3	FALSE	D11	ITS2	UNKNOWN	FAM	NFQ-MGB	32.4286	32.3463	0.377634	62.8781	68.713	20.0126
265	L1	FALSE	D12	ITS2	UNKNOWN	FAM	NFQ-MGB	30.9825	31.0077	0.0474658	185.362	181.973	6.39028
266	L2	FALSE	D12	ITS2	UNKNOWN	FAM	NFQ-MGB	30.9782	31.0077	0.0474658	185.956	181.973	6.39028
267	L3	FALSE	D12	ITS2	UNKNOWN	FAM	NFQ-MGB	31.0625	31.0077	0.0474658	174.603	181.973	6.39028
289	M1	FALSE	D13	ITS2	UNKNOWN	FAM	NFQ-MGB	33.0166	33.2963	0.328494	40.513	33.5148	7.81539
290	M2	FALSE	D13	ITS2	UNKNOWN	FAM	NFQ-MGB	33.6581	33.2963	0.328494	25.0812	33.5148	7.81539
291	M3	FALSE	D13	ITS2	UNKNOWN	FAM	NFQ-MGB	33.2142	33.2963	0.328494	34.9502	33.5148	7.81539
313	N1	FALSE	D14	ITS2	UNKNOWN	FAM	NFQ-MGB	28.5823	28.9324	0.340657	1115.01	877.017	223.942
314	N2	FALSE	D14	ITS2	UNKNOWN	FAM	NFQ-MGB	29.2627	28.9324	0.340657	670.441	877.017	223.942
315	N3	FALSE	D14	ITS2	UNKNOWN	FAM	NFQ-MGB	28.9522	28.9324	0.340657	845.603	877.017	223.942
337	O1	FALSE	D15	ITS2	UNKNOWN	FAM	NFQ-MGB	33.4589	33.7999	0.370878	29.1088	23.1275	6.16599
338	O2	FALSE	D15	ITS2	UNKNOWN	FAM	NFQ-MGB	33.7462	33.7999	0.370878	23.4816	23.1275	6.16599
339	O3	FALSE	D15	ITS2	UNKNOWN	FAM	NFQ-MGB	34.1948	33.7999	0.370878	16.7921	23.1275	6.16599
361	P1	FALSE	D16	ITS2	UNKNOWN	FAM	NFQ-MGB	34.7108	35.084	0.411861	11.4175	8.90597	2.60985
362	P2	FALSE	D16	ITS2	UNKNOWN	FAM	NFQ-MGB	35.0153	35.084	0.411861	9.09261	8.90597	2.60985
363	P3	FALSE	D16	ITS2	UNKNOWN	FAM	NFQ-MGB	35.5259	35.084	0.411861	6.20781	8.90597	2.60985
4	A4	FALSE	D17	ITS2	UNKNOWN	FAM	NFQ-MGB	Undetermined	34.5402	0.149463		13.0108	1.45073
5	A5	FALSE	D17	ITS2	UNKNOWN	FAM	NFQ-MGB	34.6459	34.5402	0.149463	11.985	13.0108	1.45073
6	A6	FALSE	D17	ITS2	UNKNOWN	FAM	NFQ-MGB	34.4345	34.5402	0.149463	14.0367	13.0108	1.45073
28	B4	FALSE	D18	ITS2	UNKNOWN	FAM	NFQ-MGB	33.313	32.7967	0.454689	32.4613	49.5069	15.1867
29	B5	FALSE	D18	ITS2	UNKNOWN	FAM	NFQ-MGB	32.6208	32.7967	0.454689	54.4628	49.5069	15.1867
30	B6	FALSE	D18	ITS2	UNKNOWN	FAM	NFQ-MGB	32.4562	32.7967	0.454689	61.5965	49.5069	15.1867
52	C4	FALSE	D19	ITS2	UNKNOWN	FAM	NFQ-MGB	29.289	29.6224	0.547176	657.403	539.065	190.292
53	C5	FALSE	D19	ITS2	UNKNOWN	FAM	NFQ-MGB	29.3244	29.6224	0.547176	640.234	539.065	190.292
54	C6	FALSE	D19	ITS2	UNKNOWN	FAM	NFQ-MGB	30.2539	29.6224	0.547176	319.558	539.065	190.292
76	D4	FALSE	D20	ITS2	UNKNOWN	FAM	NFQ-MGB	32.0331	32.4989	0.426158	84.5122	61.7671	20.363
77	D5	FALSE	D20	ITS2	UNKNOWN	FAM	NFQ-MGB	32.8693	32.4989	0.426158	45.2323	61.7671	20.363
78	D6	FALSE	D20	ITS2	UNKNOWN	FAM	NFQ-MGB	32.5942	32.4989	0.426158	55.5568	61.7671	20.363
100	E4	FALSE	D21	ITS2	UNKNOWN	FAM	NFQ-MGB	32.4841	33.2648	0.83723	60.3254	38.0191	21.5225
101	E5	FALSE	D21	ITS2	UNKNOWN	FAM	NFQ-MGB	34.1489	33.2648	0.83723	17.3771	38.0191	21.5225
102	E6	FALSE	D21	ITS2	UNKNOWN	FAM	NFQ-MGB	33.1615	33.2648	0.83723	36.3548	38.0191	21.5225
124	F4	FALSE	D22	ITS2	UNKNOWN	FAM	NFQ-MGB	32.9666	33.0305	0.280709	42.0584	40.6738	8.19946
125	F5	FALSE	D22	ITS2	UNKNOWN	FAM	NFQ-MGB	32.7872	33.0305	0.280709	48.0928	40.6738	8.19946
126	F6	FALSE	D22	ITS2	UNKNOWN	FAM	NFQ-MGB	33.3376	33.0305	0.280709	31.8702	40.6738	8.19946

## Sheet: 标准曲线
	D	CT	Quantity	LOG
		6.49789	22599999488	10.3541
		8.96025	2260000000	9.35411
		12.5612	226000000	8.35411
		14.8652	22600000	7.35411				the logarithm of plasmid copy number to base 10
		18.0203	2260000	6.35411
		21.223	226000	5.35411
		24.5893	22600	4.35411
		28.1336	2260	3.35411
	L	6.66912	21600000000	10.3345
		10.3846	2160000000	9.33445
		13.4984	216000000	8.33445		D	CT	LOG
		16.4559	21600000	7.33445			6.49789	10.3541
		19.7884	2160000	6.33445			8.96025	9.35411
		23.3342	216000	5.33445			12.5612	8.35411
		26.7684	21600	4.33445			14.8652	7.35411
		30.0647	2160	3.33445			18.0203	6.35411
							21.223	5.35411
	X	6.90206	18400000000	10.2648			24.5893	4.35411
		10.6589	1840000000	9.26482			28.1336	3.35411
		13.9644	184000000	8.26482
		16.8364	18400000	7.26482
		20.328	1840000	6.26482
		23.5164	184000	5.26482
		26.661	18400	4.26482
		29.6646	1840	3.26482
						L	Ct valuse	LOG
							6.66912	10.3345
							10.3846	9.33445
							13.4984	8.33445
							16.4559	7.33445
							19.7884	6.33445
							23.3342	5.33445
							26.7684	4.33445
							30.0647	3.33445
						X	6.90206	10.2648
							10.6589	9.26482
							13.9644	8.26482
							16.8364	7.26482
							20.328	6.26482
							23.5164	5.26482
							26.661	4.26482
							29.6646	3.26482

## Sheet: 样品拷贝数
				Ct values	copy number/ul
	D-0	D1		25.4612	11549.6			D-0	1.07867e+06		L-0	42975.2		X-3	1.125e+06
	D-0	D2	19.8361	18.7039	1.82172e+06	1.07867e+06		D-24	228947		L-24	51111.4		X-18	191119
	D-0	D3		20.9682	335624			D-48	698.609		L-48	2814.01		X-48	1540.52
	D-24	D4	21.4754	21.5949	209794	228947		D-72	125.343		L-96	2328.99		X-74	1150.8
	D-24	D5		21.3559	248099			D-96	23.1275
	D-24	D6		27.7197	2154.27			D-120	55.637
	D-48	D7		21.3513	250096			D-144	39.3465
	D-48	D8	29.3382	29.7727	477.947	698.609
	D-48	D9		28.9037	919.271
	D-72	D10		28.5261	1180.21			1180.21
	D-72	D11	31.677	32.3463	68.713	125.343		877.017
	D-72	D12		31.0077	181.973
	3d	D13		33.2963	33.5148
	3d	D14		28.9324	877.017
	4d	D15	33.7999	33.7999	23.1275	15.0148
	4d	D16		35.084	8.90597					L1	L-0 1
	4d	D17		34.5402	13.0108					L2	L-0 2
	5d	D18	32.6478	32.7967	49.5069	55.637	49.5069			L3	L-0 3
	5d	D19		29.6224	539.065		61.7671			L4	L-24 1
	6d	D20		32.4989	61.7671					L5	L-24 2
	6d	D21	33.1477	33.2648	38.0191	39.3465				L6	L-24 3
	6d	D22		33.0305	40.6738					L7	L-48 1
										L8	L-48 2
										L9	L-48 5
										L10	L-98 1
										L11	L-98 2
										L12	L-98 3
					L1									0	#NUM!
					L1
					L1			Ct values mean	copy number/ul	LOG
					L2	大麻	D-0	19.8361	1.07867e+06	6.03289
					L2		D-24	21.4754	228947	5.35973
					L2		D-48	29.3382	698.609	2.84423
					L3		D-72	31.677	125.343	2.0981
					L3		D-96	33.7999	23.1275	1.36413
					L3		D-120	32.6478	55.637	1.74536
					L4		D-144	33.1477	39.3465	1.59491
					L4	葎草	L-0	25.7144	42975.2	4.63322
					L4		L-24	27.4196	51111.4	4.70852
					L5		L-48	30.1057	2814.01	3.44933
					L5		L-96	30.586	2328.99	3.36717
					L5	向日葵	X-3	21.3437	1.125e+06	6.05115
					L6		X-18	23.3711	191119	5.2813
					L6		X-48	30.15	1540.52	3.18767
					L6		X-72	30.8824	1150.8	3.061
					L7
					L7
					L7
					L8
					L8
					L8
					L9
					L9
					L9
					L10
					L10
					L10
					L11
					L11
					L11
					L12
					L12
					L12

## Sheet: Sheet4
		D1	25.4612
		D2	18.7039
		D3	20.9682
		D4	21.5949
		D5	21.3559
		D6	27.7197
		D7	21.3513
		D8	29.7727
		D9	28.9037
		D10	28.5261
		D11	32.3463
		D12	31.0077
		D13	33.2963
		D14	28.9324
		D15	33.7999
		D16	35.084
		D17	34.5402
		D18	32.7967
		D19	29.6224
		D20	32.4989
		D21	33.2648
		D22	33.0305
