# Supplementary material for: Windborne migration amplifies insect-mediated pollination services
Source: eLife. 2022 Apr 13;11:e76230. doi: 10.7554/eLife.76230 (PMC9042232; doi:10.7554/eLife.76230)
Supplement: Figure 7—figure supplement 2—source data 1. [file elife-76230-fig7-figsupp2-data1.xlsx]

## Sheet: Order
group	AS	CC	CD	CF	CZ	DY	HB	LF	NC	PE	SH	SY	TZ	WH	XJ	XX	YL	YP	YT	YZ
Asterales	11.3571	37.8724	36.6684	25.6568	18.5335	57.6965	84.4871	21.9574	25.1369	16.9386	22.8647	67.3515	6.16429	25.4504	15.2814	45.5589	14.2777	43.2579	20.8169	8.10552
Rosales	0.06	3.27	15.0834	17.1852	0.2895	18.0409	1.43429	27.3653	26.2012	0.140714	10.5921	4.697	11.0652	6.50174	14.6375	16.6047	9.07308	16.9479	9.71345	0.257241
Brassicales	0.428571	20.6457	3.73967	0.0296	64.3065	0.68	0.602381	15.9821	0.649231	22.0846	17.0495	0.288	52.7319	14.4943	17.4093	6.13421	0.291923	0.560526	35.3852	62.9728
Caryophyllales	12.3357	7.99143	5.21683	7.4712	12.4315	7.7113	1.25238	20.0658	7.22423	11.0696	11.1595	4.8095	8.6919	5.92043	7.36893	14.98	5.74423	1.12684	11.7955	8.53828
Poales	0.0514286	7.38571	4.50972	0.7832	0.015	0.772174	0.0866667	0.644737	4.12769	0.757857	0.182105	5.2365	3.38619	0.89	0.868214	3.55368	57.5319	3.16211	0.291724	5.03034
Apiales	22.1986	5.6319	2.05061	22.908	1.076	0.282609	0.0471429	0.200526	0.0384615	11.7257	7.60579	0.0205	0.247143	0.835652	2.54286	0.0289474	0.0996154	2.19316	1.49931	0.0910345
Solanales	0	3.36381	2.99861	5.5308	0.2205	0.59913	8.29905	2.04737	15.6523	3.66107	7.06632	4.591	0.190952	4.55565	10.9936	0.376316	0.189615	3.32632	4.05	0.0772414
Lamiales	42.66	2.90905	1.3395	0.5852	0.809	0.595652	0.279048	7.01263	4.57346	11.4246	3.34579	4.7675	3.2981	8.0187	3.46214	0.17	5.88769	2.01789	5.47103	1.40379
Malvales	0	4.11429	5.80417	1.9284	0.043	6.23043	0.644286	0.680526	8.73577	0.191786	9.56579	2.3505	0.60619	15.9452	19.4621	5.28158	0.00384615	2.69737	0.332759	0.00517241
Gentianales	0	2.36	3.14244	7.0852	0	0.277826	0.0309524	0.0921053	0.284615	0.00214286	0	0.029	0.204762	0	0.00178571	0.783158	0.000384615	5.09263	0.781724	0.000689655
Ranunculales	4.71571	1.29095	1.286	5.2852	1.089	0.0113043	0.0328571	0.710526	0.0234615	0.191786	5.17263	0.05	4.61095	0.763043	0.985357	1.37737	0.0653846	3.69053	1.11724	12.2559
Fabales	0.00285714	0.122381	3.69411	2.866	0.117	0.33913	2.7619	0.44	0.124231	6.7825	0.00526316	0.468	0.0195238	0.195652	4.44321	2.96526	0.0888462	7.66526	0.532414	0.17931
Malpighiales	0	0.00142857	2.24772	1.5872	0	1.80565	0.00904762	0.00315789	0.289231	0.000714286	0	0	8.28	0	0.0410714	0.0368421	0.0184615	2.15842	0	0.949655
Saxifragales	0.181429	0.415714	2.13739	0.1416	0.003	0.123478	0	0.897368	0.0426923	0.0521429	0.375263	0.006	0.0219048	0.617391	0	0	2.79769	4.36105	0.000689655	0.000344828
Celastrales	0.00142857	0.849048	2.56389	0.0532	0.001	0.1	0.0052381	0	0.08	0	0	0.007	0	0.392609	0.00285714	0.0547368	0.000769231	0.551053	0	0
Pinales	0.0114286	0.169048	3.80911	0.1204	0.0225	0	0	0.163684	0.0173077	0	0.0747368	0.0455	0.0309524	1.94391	0.3625	0.127895	3.56038	0.0168421	0.379655	0.0327586
Sapindales	0	0.485238	2.00761	0.0972	0	2.09304	0.0133333	0.348421	0.0238462	3.97893	0.0773684	0.0675	0	1.29696	0.0110714	0.00157895	0.0173077	0.196842	0.762759	0.00137931
Ericales	5.86143	0.43381	0.0722222	0	0.811	0.0169565	0	1.36474	0.723462	9.62179	4.62947	0.104	0.228095	0.315652	0.0432143	0.623158	0.000384615	0.0163158	0.157931	0.0327586
Dipsacales	0	0	0.0167222	0.19	0.0025	0.000869565	0	0.00105263	0.00461538	0	0	0	0.047619	10.34	0	0	0	0	0	0
Fagales	0	0.00047619	0.453444	0.15	0.1895	0.516957	0	0	2.71808	0.01	0	5.021	0.0604762	1.01913	0.0575	0.0194737	0.325385	0.171579	2.0731	0.0503448
Vitales	0	0.55619	0.0102778	0	0	0	0	0	0.463846	0	0	0	0	0	0.00857143	0	0.00384615	0	3.15034	0
Commelinales	0	0	0.00255556	0	0	2.05696	0	0	0	0	0	0	0	0.126087	0.0025	0	0	0	0	0
Cucurbitales	0	0.00333333	0.0452222	0.0108	0.001	0.0286957	0.01	0.0136842	0.169231	0.611786	0.15	0.0815	0.0180952	0.216522	1.55071	0.724737	0.0134615	0.0257895	0.0986207	0.000689655
Alismatales	0	0	0.00172222	0.0068	0.035	0	0	0	2.32538	0	0	0	0	0.0104348	0	0	0	0	0	0.000689655
Cornales	0	0	0.533	0	0	0	0.00238095	0	0	0	0	0	0	0	0	0	0.00538462	0.162632	0	0
Asparagales	0	0.0742857	0.285556	0.0092	0	0	0	0	0	0	0.0794737	0	0	0	0.0225	0	0	0	0	0
Zygophyllales	0	0	0.144167	0	0	0	0	0	0	0	0	0	0	0	0	0	0	0.592105	0	0
Santalales	0	0.00571429	0.00244444	0	0	0	0	0	0	0.7175	0	0	0.0952381	0	0	0.201579	0	0	0	0
Cupressales	0	0	0.00111111	0	0	0.0208696	0	0.00842105	0.0726923	0	0	0	0	0.0973913	0.440357	0.397895	0	0	0.355517	0
Myrtales	0	0	0.000944444	0.0144	0	0	0	0	0	0.0339286	0	0	0	0	0	0	0	0	1.2331	0
c__unidentified_Unclassified	0.00142857	0	0.0772778	0.0004	0	0	0.000952381	0	0.0411538	0	0	0	0	0.0534783	0	0	0.00346154	0	0	0.00517241
Oxalidales	0	0	0.0109444	0	0	0	0	0.00105263	0.257308	0	0	0	0	0	0	0	0	0	0	0
Boraginales	0	0	0.000388889	0.3028	0	0	0	0.00210526	0	0	0	0	0	0	0	0	0	0	0	0
Zingiberales	0	0.047619	0.0111667	0.0012	0	0	0	0	0	0	0	0	0	0	0	0	0	0	0	0
Geraniales	0.13	0	0	0	0	0	0	0	0	0	0	0	0	0	0	0	0	0	0	0.01
Proteales	0	0	0.0207778	0	0	0	0	0	0	0	0	0	0	0	0	0	0	0	0	0
Garryales	0	0	0.00972222	0	0	0	0	0	0	0	0	0	0	0	0	0	0	0	0	0
c__Magnoliopsida_Unclassified	0	0.00142857	0	0	0	0	0	0	0	0	0	0.0045	0	0	0	0	0	0	0	0
Polypodiales	0	0	0	0	0	0	0	0	0	0	0.00368421	0	0	0	0	0	0	0.000526316	0.000689655	0
Crossosomatales	0	0	0	0	0	0	0	0	0	0	0	0	0	0.000869565	0	0	0	0	0	0
Liliales	0	0	0.000222222	0	0	0	0	0	0	0	0	0	0	0	0	0	0	0.00947368	0	0
Ginkgoales	0	0	0	0	0	0	0	0	0	0	0	0.0035	0	0	0	0	0	0	0	0

## Sheet: Family
group	AS	CC	CD	CF	CZ	DY	HB	LF	NC	PE	SH	SY	TZ	WH	XJ	XX	YL	YP	YT	YZ
Asteraceae	11.3571	37.8724	36.6684	25.6568	18.5335	57.6965	84.4871	21.9574	25.1369	16.9386	22.8647	67.3515	6.16429	25.4504	15.2814	45.5589	14.2777	43.2579	20.8169	8.10552	605.434
Brassicaceae	0.428571	20.6457	3.73967	0.0296	64.3065	0.68	0.602381	15.9821	0.649231	22.0846	17.0495	0.288	52.7319	14.4943	17.4093	6.13421	0.291923	0.560526	35.3852	62.9728	336.466
Cannabaceae	0	3.14286	3.91528	6.556	0.2795	17.5722	1.12286	17.1716	13.5773	0.139643	10.5711	2.5655	0.238095	5.4787	14.5918	16.3847	3.98731	12.6221	9.04759	0.203448	139.168
Poaceae	0.0514286	7.38571	4.48583	0.7832	0.015	0.772174	0.0857143	0.644737	3.32115	0.757857	0.182105	5.2365	3.38619	0.89	0.868214	3.55368	57.5319	3.16211	0.291724	5.03034	98.4356
Apiaceae	22.1986	5.6319	1.66761	22.908	1.076	0.282609	0.0471429	0.200526	0.00384615	10.0221	7.60579	0.0205	0.247143	0.835652	2.54286	0.0289474	0.0996154	2.19316	1.49931	0.0903448	79.2017
Chenopodiaceae	0	3.48286	4.06939	2.6348	7.5825	1.30435	1.15	3.32	0.175385	0.0742857	10.6479	4.5245	4.39619	1.74609	5.74429	7.51842	3.38577	1.09053	9.44	1.32172	73.609
Rosaceae	0.0514286	0	3.22933	10.2628	0.01	0.427391	0.00047619	10.1358	0.259231	0.000357143	0	2.0825	10.4586	0.0678261	0	0.122105	5.08346	1.37947	0.663793	0.00172414	44.2363
Solanaceae	0	3.12286	1.46661	0.9856	0.1505	0.495217	8.26333	1.65421	15.3123	3.65929	0.347368	4.5375	0.190952	4.38391	10.9171	0.360526	0.0130769	2.98316	0.386207	0.000689655	59.2305
Malvaceae	0	4.11429	5.80417	1.9284	0.043	6.23043	0.644286	0.680526	8.73577	0.191786	9.56579	2.3505	0.60619	15.9452	19.4621	5.28158	0.00384615	2.69737	0.332759	0.00517241	84.6232
Amaranthaceae	0	0.0638095	0.100444	0.044	0.012	0.0743478	0.012381	16.4795	2.57462	9.15393	0.0405263	0.102	0.258095	0.223913	1.45857	7.36842	0.00307692	0	0.0134483	0	37.9831
Rubiaceae	0	2.36	3.096	7.0852	0	0.277826	0.0309524	0.0921053	0.284615	0.00214286	0	0.029	0.204762	0	0.00178571	0.783158	0.000384615	5.09263	0.781724	0.000689655	20.123
Fabaceae	0.00285714	0.122381	3.69411	2.866	0.117	0.33913	2.7619	0.44	0.124231	6.7825	0.00526316	0.468	0.0195238	0.195652	4.44321	2.96526	0.0888462	7.66526	0.532414	0.17931	33.8129
Ranunculaceae	4.71571	1.29095	0.358944	5.1644	1.089	0.0113043	0.0328571	0.710526	0.0234615	0.191786	5.17263	0.05	4.61095	0.763043	0.985357	1.37737	0.0653846	3.67	1.11724	12.2559	43.6568
Polygonaceae	0	4.16762	0.523667	4.7184	0	6.12913	0.082381	0.164211	3.32423	0.00464286	0	0.183	0.707143	3.94565	0.0025	0.0705263	1.25115	0.0363158	2.32655	1.92172	29.5588
Crassulaceae	0.181429	0.415714	2.13739	0.1416	0.003	0.123478	0	0.897368	0.0426923	0.0521429	0.375263	0.006	0.0219048	0.617391	0	0	2.79769	4.36105	0.000689655	0	12.1748
Caryophyllaceae	12.3357	0.277143	0.494444	0.052	4.837	0.0121739	0.00809524	0.00578947	0.0376923	1.41214	0.471053	0	3.18619	0.00434783	0.163571	0.0226316	1.10385	0	0.0158621	5.29483	29.7345
Plantaginaceae	0	1.61952	0.0656111	0	0.251	0	0.00047619	0.00210526	0.249231	6.35179	0.00105263	0.0195	3.02286	0.507391	3.34571	0.00210526	5.59846	0	4.37414	1.38138	26.7923
Moraceae	0.00857143	0	6.12844	0.0032	0	0	0.00428571	0.0226316	0	0	0	0.0495	0.355714	0	0.0167857	0	0	0.174211	0.00103448	0.0513793	6.81576
Celastraceae	0.00142857	0.849048	2.56389	0.0532	0.001	0.1	0.0052381	0	0.08	0	0	0.007	0	0.392609	0.00285714	0.0547368	0.000769231	0.551053	0	0	4.66283
Pinaceae	0.0114286	0.169048	3.80911	0.1204	0.0225	0	0	0.163684	0.0173077	0	0.0747368	0.0455	0.0309524	1.94391	0.3625	0.127895	3.56038	0.0168421	0.379655	0.0327586	10.8886
Convolvulaceae	0	0.241429	1.53211	4.5444	0.07	0.103913	0.0357143	0.392632	0.34	0.00178571	6.71895	0.0535	0	0.171739	0.0764286	0.0157895	0.176538	0.343158	3.66379	0.0765517	18.5584
Lamiaceae	0.00142857	0.967619	1.18639	0.5852	0	0.516957	0	6.07474	0.00115385	0	0.00105263	3.5735	0	0.00913043	0.0807143	0.00315789	0.000384615	2.01789	1.07414	0	16.0935
Primulaceae	5.86143	0.43381	0.0703889	0	0.7965	0	0	0	0	9.62179	4.62947	0.104	0.223333	0.18087	0.0432143	0.623158	0.000384615	0	0.157931	0.0327586	22.779
Phyllanthaceae	0	0	2.00133	0.0004	0	0	0	0	0.000769231	0	0	0	0	0	0	0	0	0	0	0	2.0025
Oleaceae	0	0.00142857	0.0616667	0	0	0.0786957	0.278571	0	4.305	2.33036	0	1.175	0	7.46652	0	0	0.288077	0	0.0193103	0	16.0046
Euphorbiaceae	0	0	0.00716667	1.5416	0	0	0.00904762	0.000526316	0	0.000357143	0	0	8.14143	0	0.00714286	0.0368421	0	0.00157895	0	0.948621	10.6943
Urticaceae	0	0	0.0181667	0.232	0	0.00826087	0	0	10.2962	0	0	0	0	0	0	0	0.00192308	0	0	0	10.5565
Verbenaceae	42.6586	0.0909524	0.00433333	0	0.436	0	0	0.935789	0.0161538	0.126071	3.34368	0	0.275714	0.0347826	0.0225	0	0	0	0.00103448	0.0224138	47.968
Sapindaceae	0	0.0733333	0.763556	0	0	0	0	0.00947368	0	1.58036	0	0	0	1.20087	0	0	0	0	0.00206897	0	3.62966
Adoxaceae	0	0	0.0167222	0	0.0025	0	0	0.00105263	0.00461538	0	0	0	0	10.34	0	0	0	0	0	0	10.3649
Rhamnaceae	0	0	1.72244	0.0052	0	0.0278261	0.0119048	0	0.289615	0	0	0	0	0.0291304	0.0289286	0.0978947	0	2.59684	0	0	4.80979
Fagaceae	0	0.00047619	0.321667	0	0.163	0.365652	0	0	2.71808	0.01	0	0.022	0	1.01913	0	0	0.0880769	0.171579	2.07207	0.0503448	7.00207
Rutaceae	0	0.407143	0.343	0.0956	0	2.08522	0.0133333	0.337895	0.0119231	0	0.0763158	0.0305	0	0.0865217	0.0110714	0.00157895	0.0153846	0.0610526	0.598966	0.00137931	4.17688
Meliaceae	0	0.0047619	0.008	0.0004	0	0	0	0	0	2.38464	0.00105263	0.037	0	0	0	0	0	0	0.162069	0	2.59793
Papaveraceae	0	0	0.798278	0.1208	0	0	0	0	0	0	0	0	0	0	0	0	0	0.0205263	0	0	0.939604
Mazaceae	0	0.229524	0.0172778	0	0	0	0	0	0	2.6175	0	0	0	0	0	0	0	0	0.00241379	0	2.86672
Ulmaceae	0	0.127619	0.0271111	0.1244	0	0.00521739	0	0.000526316	1.78	0.000714286	0.0210526	0	0.0138095	0.926087	0	0	0	0.175789	0.00103448	0.00103448	3.2044
Vitaceae	0	0.55619	0.0102778	0	0	0	0	0	0.463846	0	0	0	0	0	0.00857143	0	0.00384615	0	3.15034	0	4.19308
Commelinaceae	0	0	0.00255556	0	0	2.05696	0	0	0	0	0	0	0	0.126087	0.0025	0	0	0	0	0	2.1881
Salicaceae	0	0.00142857	0.237778	0.0452	0	1.80565	0	0.00315789	0.0407692	0.000357143	0	0	0.138571	0	0.0339286	0	0	2.15684	0	0.00103448	4.46472
Juglandaceae	0	0	0.0521111	0.15	0	0.148696	0	0	0	0	0	4.7115	0.0604762	0	0.0575	0	0	0	0	0	5.18028
Cucurbitaceae	0	0.00333333	0.0452222	0.0108	0.001	0.0286957	0.01	0.0136842	0.169231	0.611786	0.15	0.0815	0.0180952	0.216522	1.55071	0.724737	0.0134615	0.0257895	0.0986207	0.000689655	3.77388
Potamogetonaceae	0	0	0.00172222	0.0068	0	0	0	0	2.32538	0	0	0	0	0.0104348	0	0	0	0	0	0	2.34434
Hydrangeaceae	0	0	0.533	0	0	0	0.00238095	0	0	0	0	0	0	0	0	0	0.00538462	0.162632	0	0	0.703397
Cyperaceae	0	0	0.0239444	0	0	0	0.000952381	0	0.806538	0	0	0	0	0	0	0	0	0	0	0	0.831435
Amaryllidaceae	0	0.0742857	0.285556	0.0044	0	0	0	0	0	0	0	0	0	0	0	0	0	0	0	0	0.364241
Simaroubaceae	0	0	0.879389	0.0016	0	0	0	0.00105263	0	0	0	0	0	0.00956522	0	0	0.00192308	0.121579	0	0	1.01511
Portulacaceae	0	0	0.029	0.0216	0	0.0813043	0	0.0973684	0	0.424286	0	0	0	0	0	0	0	0	0	0	0.653558
Talinaceae	0	0	0	0	0	0	0	0	1.11269	0	0	0	0	0	0	0	0	0	0	0	1.11269
Zygophyllaceae	0	0	0.144167	0	0	0	0	0	0	0	0	0	0	0	0	0	0	0.592105	0	0	0.736272
Cervantesiaceae	0	0.00571429	0.00244444	0	0	0	0	0	0	0.683214	0	0	0.0952381	0	0	0.201579	0	0	0	0	0.98819
Cupressaceae	0	0	0.00111111	0	0	0.0208696	0	0.00842105	0.0726923	0	0	0	0	0.0973913	0.440357	0.397895	0	0	0.355517	0	1.39425
Lythraceae	0	0	0.000888889	0.0136	0	0	0	0	0	0.0335714	0	0	0	0	0	0	0	0	1.2331	0	1.28116
o__unidentified_Unclassified	0.00142857	0.00142857	0.0772778	0.0004	0	0	0.000952381	0	0.0411538	0	0	0.0045	0	0.0534783	0	0	0.00346154	0	0	0.00517241	0.189253
Araliaceae	0	0	0.000166667	0	0	0	0	0	0	1.70321	0	0	0	0	0	0	0	0	0	0	1.70338
Oxalidaceae	0	0	0.0109444	0	0	0	0	0.00105263	0.257308	0	0	0	0	0	0	0	0	0	0	0	0.269305
Betulaceae	0	0	0.0797222	0	0.0265	0.00304348	0	0	0	0	0	0.287	0	0	0	0.0194737	0.237308	0	0.00103448	0	0.654082
Balsaminaceae	0	0	0	0	0	0	0	1.36474	0	0	0	0	0	0	0	0	0	0	0	0	1.36474
Elaeagnaceae	0	0	0.0422778	0	0	0	0.294762	0.0352632	0	0	0	0	0	0	0	0	0	0	0	0	0.372303
Pittosporaceae	0	0	0.382833	0	0	0	0	0	0.0346154	0	0	0	0	0	0	0	0	0	0	0.000689655	0.418138
Theaceae	0	0	0.00138889	0	0.014	0	0	0	0.723462	0	0	0	0.0047619	0	0	0	0	0.0163158	0	0	0.759928
Passifloraceae	0	0	0.00127778	0	0	0	0	0	0.248077	0	0	0	0	0	0	0	0.0184615	0	0	0	0.267816
Tamaricaceae	0	0	5.55556e-05	0	0	0.107391	0	0	0	0	0	0	0.144286	0	0	0	0	0	0	0	0.251733
Boraginaceae	0	0	0.000388889	0.3028	0	0	0	0.00210526	0	0	0	0	0	0	0	0	0	0	0	0	0.305294
Iridaceae	0	0	0	0.0048	0	0	0	0	0	0	0.0794737	0	0	0	0.0225	0	0	0	0	0	0.106774
Musaceae	0	0.047619	0.0111667	0.0012	0	0	0	0	0	0	0	0	0	0	0	0	0	0	0	0	0.0599857
Gentianaceae	0	0	0.0464444	0	0	0	0	0	0	0	0	0	0	0	0	0	0	0	0	0	0.0464444
Amphorogynaceae	0	0	0	0	0	0	0	0	0	0.0342857	0	0	0	0	0	0	0	0	0	0	0.0342857
Caprifoliaceae	0	0	0	0.19	0	0.000869565	0	0	0	0	0	0	0.047619	0	0	0	0	0	0	0	0.238489
Pedaliaceae	0	0	0	0	0.1225	0	0	0	0	0	0	0	0	0	0	0	0	0	0	0	0.1225
Paulowniaceae	0	0	0	0	0	0	0	0	0.00192308	0	0	0	0	0	0.0132143	0.164737	0	0	0	0	0.179874
Geraniaceae	0.13	0	0	0	0	0	0	0	0	0	0	0	0	0	0	0	0	0	0	0.01	0.14
Platanaceae	0	0	0.0207778	0	0	0	0	0	0	0	0	0	0	0	0	0	0	0	0	0	0.0207778
Anacardiaceae	0	0	0.00216667	0	0	0.00782609	0	0	0.0119231	0.0139286	0	0	0	0	0	0	0	0.0142105	0	0	0.0500549
Menispermaceae	0	0	0.128778	0	0	0	0	0	0	0	0	0	0	0	0	0	0	0	0	0	0.128778
Eucommiaceae	0	0	0.00972222	0	0	0	0	0	0	0	0	0	0	0	0	0	0	0	0	0	0.00972222
Alismataceae	0	0	0	0	0.035	0	0	0	0	0	0	0	0	0	0	0	0	0	0	0.000689655	0.0356897
Actinidiaceae	0	0	0.000111111	0	0	0.0169565	0	0	0	0	0	0	0	0	0	0	0	0	0	0	0.0170676
Ebenaceae	0	0	0	0	0	0	0	0	0	0	0	0	0	0.134783	0	0	0	0	0	0	0.134783
Nitrariaceae	0	0	0.0115556	0	0	0	0	0	0	0	0	0	0	0	0	0	0	0	0	0	0.0115556
Symplocaceae	0	0	0.000333333	0	0	0	0	0	0	0	0	0	0	0	0	0	0	0	0	0	0.000333333
Onagraceae	0	0	5.55556e-05	0.0008	0	0	0	0	0	0	0	0	0	0	0	0	0	0	0	0	0.000855556
Polypodiaceae	0	0	0	0	0	0	0	0	0	0	0.00368421	0	0	0	0	0	0	0.000526316	0.000689655	0	0.00490018
Putranjivaceae	0	0	0.000166667	0	0	0	0	0	0	0	0	0	0	0	0	0	0	0	0	0	0.000166667
Liliaceae	0	0	0.000222222	0	0	0	0	0	0	0	0	0	0	0	0	0	0	0.00947368	0	0	0.00969591
Acanthaceae	0	0	0.000888889	0	0	0	0	0	0	0	0	0	0	0.000434783	0	0	0	0	0	0	0.00132367
Staphyleaceae	0	0	0	0	0	0	0	0	0	0	0	0	0	0.000869565	0	0	0	0	0	0	0.000869565
Plumbaginaceae	0	0	0.000277778	0	0	0	0	0	0	0	0	0	0	0	0	0	0	0	0	0	0.000277778
Ginkgoaceae	0	0	0	0	0	0	0	0	0	0	0	0.0035	0	0	0	0	0	0	0	0	0.0035
Myrtaceae	0	0	0	0	0	0	0	0	0	0.000357143	0	0	0	0	0	0	0	0	0	0	0.000357143
Paeoniaceae	0	0	0	0	0	0	0	0	0	0	0	0	0	0	0	0	0	0	0	0.000344828	0.000344828
Cactaceae	0	0	0	0	0	0.00173913	0	0	0	0	0	0	0	0	0	0	0	0	0	0	0.00173913
Scrophulariaceae	0	0	0.00344444	0	0	0	0	0	0	0	0	0	0	0	0	0	0	0	0	0	0.00344444

## Sheet: Genus
group	AS	CC	CD	CF	CZ	DY	HB	LF	NC	PE	SH	SY	TZ	WH	XJ	XX	YL	YP	YT	YZ
g_Artemisia	0	11.349	15.012	12.5644	0.683	41.0722	44.1076	2.3	8.935	0.03	20.1253	11.773	1.89667	11.0296	7.71536	18.03	0.205769	8.46579	5.31034	0.212414
g_Brassica	0.428571	20.019	1.4835	0.0188	20.1675	0.583043	0.369048	13.8684	0.00923077	16.6307	0.523158	0.091	34.64	14.1061	16.0386	5.82526	0.254615	0.221579	34.0528	54.6083
g_Humulus	0	1.22762	3.04617	1.4468	0.105	16.9178	1.07095	16.8758	13.5373	0.0225	0.111053	2.4985	0.2	5.38739	14.3479	16.1016	3.75615	9.01526	8.75379	0.00862069
g_Festuca	0	0.0690476	1.60556	0	0.012	0	0.000952381	0.03	1.07346	0.0185714	0.00263158	4.427	0.0147619	0.447391	0.02	0.00894737	50.34	0.00105263	0	0
g_Ajania	0	2.20238	8.58633	0.0788	0.001	0.284783	0	0	0.109231	0.0342857	0	7.5135	0	0	0.0703571	0.0152632	0	0	0.00275862	0
g_Gossypium	0	4.11429	5.75972	1.6136	0.043	6.23043	0.0928571	0.680526	8.73577	0.191786	9.56579	2.3505	0.60619	15.9452	19.4621	5.28158	0.000769231	2.69737	0.331724	0.00517241
g_Potentilla	0	0	1.96689	10.2204	0	0.326087	0.00047619	9.49579	0.03	0	0	1.5475	0.450952	0.000434783	0	0.122105	0.540385	0.322632	0.518276	0.00172414
g_Sphallerocarpus	0	0	0.137056	22.6964	0	0	0.00142857	0.00578947	0	0	0	0.002	0.21381	0.0447826	0.00321429	0.0289474	0.000384615	2.17579	0.583793	0.000689655
g_Ixeris	0	0.0166667	1.83928	1.0384	17.068	0.0204348	0.00238095	5.70684	0.285	0.0025	0	1.9895	0	0.0630435	0.0342857	0	9.48269	0.136316	1.53069	0
g_Capsella	0	0.279524	0.853444	0	31.386	0	0.00714286	0.00789474	0.0419231	2.88429	0	0	10.5143	0.386522	0.417857	0.134737	0.0334615	0.0210526	0.935172	6.74483
g_Amaranthus	0	0.0557143	0.0970556	0.044	0.012	0.0743478	0.012381	16.4795	1.685	7.70714	0.0405263	0.102	0.258095	0.0630435	1.45857	7.36842	0.00307692	0	0.0124138	0
g_Chenopodium	0	3.48286	2.03333	2.6324	7.5425	0.256522	1.10286	1.23158	0.165769	0.0164286	4.64368	0.002	4.39619	1.71913	3.65929	1.40526	3.38385	0.877368	8.55793	1.31172
g_Rubia	0	2.36	3.096	7.0852	0	0.277826	0.0309524	0.0921053	0.284615	0	0	0.029	0.204762	0	0.00178571	0.562105	0.000384615	5.08526	0.781034	0.000689655
g_Helianthus	0	3.15476	0.576222	5.576	0.011	0.0373913	0.0257143	4.42737	1.35538	0	0	0.5465	0.578095	0.0108696	0.528214	0.270526	0.174231	26.9537	0.205862	0.00206897
g_Iva	0	0	0.926611	0	0	0.000869565	30.1405	0	2.99615	0.000357143	0	0.037	0	0	0	0.00421053	0.000769231	0.000526316	0	0
g_Stellaria	12.1771	0.270952	0.0544444	0	4.803	0	0.00761905	0.00578947	0.00961538	1.39071	0.471053	0	3.15429	0.00434783	0.163571	0.0226316	1.08846	0	0.0158621	5.23897
g_Eclipta	0	0.0995238	1.64617	0.5268	0.2	0.151739	0.00761905	0.0731579	3.92346	0.0292857	0.0947368	0.0415	0.56619	6.17087	2.32107	18.3395	0.01	0.462105	0.444138	0.00310345
g_Solanum	0	2.82905	0.282611	0.008	0.036	0.000869565	8.2119	1.41105	0.690385	0.0564286	0.138947	4.535	0	1.00304	0.00107143	0.0147368	0.0130769	2.19737	0.00482759	0
g_Veronica	0	1.61667	0.0654444	0	0.251	0	0.00047619	0.00210526	0.249231	6.335	0.00105263	0.0195	3.02286	0.507391	3.34571	0.00210526	5.59385	0	4.37414	1.38138
g_Cannabis	0	1.91476	0.868944	5.1104	0.175	0.654348	0.0519048	0.296316	0.04	0.0364286	10.46	0.0665	0.0380952	0.0913043	0.244286	0.283684	0.231154	3.60579	0.293793	0.194828
g_Ranunculus	4.33571	0.954762	0.0411667	0	1.0585	0	0.00952381	0.697895	0	0.167143	4.97053	0.012	4.58333	0.67913	0.985357	1.30263	0	0	0.967931	12.2541
g_Capsicum	0	0.0928571	0.298389	0.7184	0	0.154348	0.0185714	0.00578947	0.917692	3.585	0.00210526	0.002	0.190476	3.22913	7.62429	0.345789	0	0.165789	0.335517	0
g_Peucedanum	21.4243	1.13857	0.852222	0.2056	1.043	0.273478	0.0438095	0.188421	0	0.0689286	7.40684	0	0.0171429	0.760435	2.4975	0	0.0592308	0.0168421	0.768621	0.0862069
g_Ambrosia	0	7.71619	0.563333	0.05	0	2.91304	0.966667	0.262105	0	0.00107143	0	10.6	0.0528571	1.19652	0.0107143	0.239474	0	0.0421053	0	0.00103448
g_Sonchus	0	0.0185714	0.823389	0	0.0785	0.0569565	0.0319048	0.000526316	0	1.48714	0.355789	0.0245	0.398571	0.0578261	0.0625	3.14421	0.113846	1.75632	5.3531	4.21621
g_Paraixeris	0	0.0280952	0.468222	0	0	0	0	0	0	0.0025	0	16.1055	0	0	0	0	0	0	0	0
g_Raphanus	0	0.347143	0.176778	0.01	3.6085	0.0969565	0.00285714	2.10579	0.597692	2.23929	0	0	7.50095	0.00130435	0.0621429	0.0605263	0.00115385	0.133684	0.181034	1.42483
g_Streptanthus	0	0	0.104111	0	0.516	0	0.209524	0	0	0.319286	16.2016	0.197	0.0647619	0	0.779643	0.0984211	0	0	0.211034	0.183448
g_Glandularia	42.6586	0.0909524	0.00411111	0	0.436	0	0	0.935789	0.0161538	0.126071	3.34368	0	0.275714	0.0347826	0.0225	0	0	0	0.00103448	0.0224138
g_Nicotiana	0	0.200952	0.851944	0.2276	0.1145	0.128261	0.00047619	0.235789	13.7038	0.0178571	0.206316	0	0	0.151304	0.0778571	0	0	0.131579	0.0458621	0.000689655
g_Others	18.9757	34.35	45.8796	28.128	10.649	29.4883	13.4719	22.5779	40.6081	56.5993	21.3353	35.4875	26.161	36.9091	18.0443	20.9874	24.7127	35.5147	25.4266	12.0966
