# Supplementary material for: Windborne migration amplifies insect-mediated pollination services
Source: eLife. 2022 Apr 13;11:e76230. doi: 10.7554/eLife.76230 (PMC9042232; doi:10.7554/eLife.76230)
Supplement: Figure 7—source data 1. [file elife-76230-fig7-data1.xlsx]

## Sheet: Sheet1
	Phylum	Class	Order	Values	Plant features
1	p__Gymnospermae	Ginkgopsida	o__Ginkgoales	1	W	f__Ginkgoaceae;g__Ginkgo
2	p__Angiospermae	Monocotyledoneae	o__Alismatales	2	H	f__Alismataceae;g__Sagittaria
			o__Alismatales		H	f__Potamogetonaceae;g__Potamogeton
3	p__Angiospermae	Dicotyledoneae	o__Apiales	24	H	f__Apiaceae;g__Angelica
			o__Apiales		H	f__Apiaceae;g__Apium
			o__Apiales		H	f__Apiaceae;g__Bupleurum
			o__Apiales		H	f__Apiaceae;g__Cnidium
			o__Apiales		H	f__Apiaceae;g__Coriandrum
			o__Apiales		H	f__Apiaceae;g__Cuminum
			o__Apiales		H	f__Apiaceae;g__Daucus
			o__Apiales		H	f__Apiaceae;g__Ferula
			o__Apiales		H	f__Apiaceae;g__Foeniculum
			o__Apiales		H	f__Apiaceae;g__Glehnia
			o__Apiales		H	f__Apiaceae;g__Ledebouriella
			o__Apiales		H	f__Apiaceae;g__Lignocarpa
			o__Apiales		H	f__Apiaceae;g__Lomatium
			o__Apiales		H	f__Apiaceae;g__Ostericum
			o__Apiales		H	f__Apiaceae;g__Pachypleurum
			o__Apiales		H	f__Apiaceae;g__Peucedanum
			o__Apiales		H	f__Apiaceae;g__Sium
			o__Apiales		H	f__Apiaceae;g__Sphallerocarpus
			o__Apiales		H	f__Apiaceae;g__Thapsia
			o__Apiales		H	f__Apiaceae;g__Torilis
			o__Apiales			f__Apiaceae;g__x Beruladium
			o__Apiales		H	f__Araliaceae;g__Hydrocotyle
			o__Apiales		H	f__Araliaceae;g__Panax
			o__Apiales		W	f__Pittosporaceae;g__Pittosporum
4	p__Angiospermae	Monocotyledoneae	o__Asparagales	2	H	f__Amaryllidaceae;g__Allium
			o__Asparagales		H	f__Iridaceae;g__Iris
5	p__Angiospermae	Dicotyledoneae	o__Asterales	84	H	f__Asteraceae;g__Abrotanella
			o__Asterales		H	f__Asteraceae;g__Achillea
			o__Asterales		H	f__Asteraceae;g__Acmella
			o__Asterales		H	f__Asteraceae;g__Ageratum
			o__Asterales		H	f__Asteraceae;g__Ajania
			o__Asterales		H	f__Asteraceae;g__Ambrosia
			o__Asterales		H	f__Asteraceae;g__Anacyclus
			o__Asterales		H	f__Asteraceae;g__Andryala
			o__Asterales		H	f__Asteraceae;g__Anisopappus
			o__Asterales		H	f__Asteraceae;g__Artemisia
			o__Asterales		H	f__Asteraceae;g__Aster
			o__Asterales		H	f__Asteraceae;g__Atractylodes
			o__Asterales		H	f__Asteraceae;g__Bidens
			o__Asterales		H	f__Asteraceae;g__Blumea
			o__Asterales		H	f__Asteraceae;g__Calendula
			o__Asterales		H	f__Asteraceae;g__Carduus
			o__Asterales		H	f__Asteraceae;g__Carthamus
			o__Asterales		H	f__Asteraceae;g__Centipeda
			o__Asterales		H	f__Asteraceae;g__Chorisiva
			o__Asterales		H	f__Asteraceae;g__Chrysanthemoides
			o__Asterales		H	f__Asteraceae;g__Chrysanthemum
			o__Asterales		H	f__Asteraceae;g__Cirsium
			o__Asterales		H	f__Asteraceae;g__Coreopsis
			o__Asterales		H	f__Asteraceae;g__Cosmos
			o__Asterales		H	f__Asteraceae;g__Cotula
			o__Asterales		H	f__Asteraceae;g__Crassocephalum
			o__Asterales		H	f__Asteraceae;g__Crepidiastrum
			o__Asterales		H	f__Asteraceae;g__Crepis
			o__Asterales		H	f__Asteraceae;g__Cuspidia
			o__Asterales		H	f__Asteraceae;g__Cylindrocline
			o__Asterales		H	f__Asteraceae;g__Echinops
			o__Asterales		H	f__Asteraceae;g__Eclipta
			o__Asterales		H	f__Asteraceae;g__Erechtites
			o__Asterales		H	f__Asteraceae;g__Erigeron
			o__Asterales		H	f__Asteraceae;g__Eupatorium
			o__Asterales		H	f__Asteraceae;g__Euthamia
			o__Asterales		H	f__Asteraceae;g__Flaveria
			o__Asterales		H	f__Asteraceae;g__Gaillardia
			o__Asterales		H	f__Asteraceae;g__Galinsoga
			o__Asterales		H	f__Asteraceae;g__Gerbera
			o__Asterales		H	f__Asteraceae;g__Hedypnois
			o__Asterales		H	f__Asteraceae;g__Helianthus
			o__Asterales		H	f__Asteraceae;g__Hemisteptia
			o__Asterales		H	f__Asteraceae;g__Hieracium
			o__Asterales		H	f__Asteraceae;g__Hypochaeris
			o__Asterales		H	f__Asteraceae;g__Inula
			o__Asterales		H	f__Asteraceae;g__Iva
			o__Asterales		H	f__Asteraceae;g__Ixeris
			o__Asterales		H	f__Asteraceae;g__Klasea
			o__Asterales		H	f__Asteraceae;g__Lactuca
			o__Asterales		H	f__Asteraceae;g__Laennecia
			o__Asterales		H	f__Asteraceae;g__Leontodon
			o__Asterales		H	f__Asteraceae;g__Leucheria
			o__Asterales		H	f__Asteraceae;g__Leucoptera
			o__Asterales		H	f__Asteraceae;g__Matricaria
			o__Asterales		H	f__Asteraceae;g__Melampodium
			o__Asterales		H	f__Asteraceae;g__Myxopappus
			o__Asterales		H	f__Asteraceae;g__Nassauvia
			o__Asterales		H	f__Asteraceae;g__Paraixeris
			o__Asterales		H	f__Asteraceae;g__Parthenice
			o__Asterales		H	f__Asteraceae;g__Parthenium
			o__Asterales		H	f__Asteraceae;g__Pegolettia
			o__Asterales		H	f__Asteraceae;g__Pentalepis
			o__Asterales		H	f__Asteraceae;g__Pentanema
			o__Asterales		H	f__Asteraceae;g__Pentzia
			o__Asterales		H	f__Asteraceae;g__Perezia
			o__Asterales		H	f__Asteraceae;g__Picris
			o__Asterales		H	f__Asteraceae;g__Pseudognaphalium
			o__Asterales		H	f__Asteraceae;g__Psiadia
			o__Asterales		H	f__Asteraceae;g__Rhaponticum
			o__Asterales		H	f__Asteraceae;g__Saussurea
			o__Asterales		H	f__Asteraceae;g__Silybum
			o__Asterales		H	f__Asteraceae;g__Smallanthus
			o__Asterales		H	f__Asteraceae;g__Sonchus
			o__Asterales		H	f__Asteraceae;g__Spilanthes
			o__Asterales		H	f__Asteraceae;g__Tagetes
			o__Asterales		H	f__Asteraceae;g__Taraxacum
			o__Asterales		H	f__Asteraceae;g__Tridax
			o__Asterales		H	f__Asteraceae;g__Ursinia
			o__Asterales		H	f__Asteraceae;g__Viguiera
			o__Asterales		H	f__Asteraceae;g__Westoniella
			o__Asterales		H	f__Asteraceae;g__Xanthium
			o__Asterales		H	f__Asteraceae;g__Youngia
			o__Asterales		H	f__Asteraceae;g__Zinnia
6	p__Angiospermae	Dicotyledoneae	o__Boraginales	4	H	f__Boraginaceae;g__Eritrichium
			o__Boraginales		H	f__Boraginaceae;g__Nihon
			o__Boraginales		H	f__Boraginaceae;g__Thyrocarpus
			o__Boraginales		H	f__Boraginaceae;g__Trigonotis
7	p__Angiospermae	Dicotyledoneae	o__Brassicales	14	H	f__Brassicaceae;g__Alyssum
			o__Brassicales		H	f__Brassicaceae;g__Brassica
			o__Brassicales		H	f__Brassicaceae;g__Camelina
			o__Brassicales		H	f__Brassicaceae;g__Capsella
			o__Brassicales		H	f__Brassicaceae;g__Descurainia
			o__Brassicales		H	f__Brassicaceae;g__Erysimum
			o__Brassicales		H	f__Brassicaceae;g__Isatis
			o__Brassicales		H	f__Brassicaceae;g__Lepidium
			o__Brassicales		H	f__Brassicaceae;g__Matthiola
			o__Brassicales			f__Brassicaceae;g__Neuontobotrys
			o__Brassicales		H	f__Brassicaceae;g__Raphanus
			o__Brassicales		H	f__Brassicaceae;g__Rorippa
			o__Brassicales		H	f__Brassicaceae;g__Sisymbrium
			o__Brassicales			f__Brassicaceae;g__Streptanthus
8	p__Angiospermae	Dicotyledoneae	o__Caryophyllales	40	H	f__Amaranthaceae;g__Achyranthes
			o__Caryophyllales		H	f__Amaranthaceae;g__Aerva
			o__Caryophyllales		H	f__Amaranthaceae;g__Alternanthera
			o__Caryophyllales		H	f__Amaranthaceae;g__Amaranthus
			o__Caryophyllales		H	f__Amaranthaceae;g__Celosia
			o__Caryophyllales			f__Cactaceae;g__Stenocereus
			o__Caryophyllales		H	f__Caryophyllaceae;g__Dianthus
			o__Caryophyllales		H	f__Caryophyllaceae;g__Eremogone
			o__Caryophyllales		H	f__Caryophyllaceae;g__Gypsophila
			o__Caryophyllales		H	f__Caryophyllaceae;g__Myosoton
			o__Caryophyllales		H	f__Caryophyllaceae;g__Sagina
			o__Caryophyllales		H	f__Caryophyllaceae;g__Silene
			o__Caryophyllales		H	f__Caryophyllaceae;g__Spergula
			o__Caryophyllales		H	f__Caryophyllaceae;g__Stellaria
			o__Caryophyllales		H	f__Chenopodiaceae;g__Agriophyllum
			o__Caryophyllales		H	f__Chenopodiaceae;g__Atriplex
			o__Caryophyllales		H	f__Chenopodiaceae;g__Bassia
			o__Caryophyllales		H	f__Chenopodiaceae;g__Camphorosma
			o__Caryophyllales		H	f__Chenopodiaceae;g__Chenopodium
			o__Caryophyllales		H	f__Chenopodiaceae;g__Corispermum
			o__Caryophyllales		H	f__Chenopodiaceae;g__Dysphania
			o__Caryophyllales		H	f__Chenopodiaceae;g__Grubovia
			o__Caryophyllales		W	f__Chenopodiaceae;g__Haloxylon
			o__Caryophyllales		W1	f__Chenopodiaceae;g__Kalidium
			o__Caryophyllales		W1	f__Chenopodiaceae;g__Krascheninnikovia
			o__Caryophyllales		H	f__Chenopodiaceae;g__Oxybasis
			o__Caryophyllales		H	f__Chenopodiaceae;g__Petrosimonia
			o__Caryophyllales		H	f__Chenopodiaceae;g__Salsola
			o__Caryophyllales		H	f__Chenopodiaceae;g__Suaeda
			o__Caryophyllales		H	f__Plumbaginaceae;g__Limonium
			o__Caryophyllales		H	f__Polygonaceae;g__Bistorta
			o__Caryophyllales		H	f__Polygonaceae;g__Fagopyrum
			o__Caryophyllales		H	f__Polygonaceae;g__Fallopia
			o__Caryophyllales		H	f__Polygonaceae;g__Koenigia
			o__Caryophyllales		H	f__Polygonaceae;g__Persicaria
			o__Caryophyllales		H	f__Polygonaceae;g__Polygonum
			o__Caryophyllales		H	f__Polygonaceae;g__Rumex
			o__Caryophyllales		H	f__Portulacaceae;g__Portulaca
			o__Caryophyllales		H	f__Talinaceae;g__Talinum
			o__Caryophyllales		W	f__Tamaricaceae;g__Tamarix
9	p__Angiospermae	Dicotyledoneae	o__Celastrales	3	W	f__Celastraceae;g__Celastrus
			o__Celastrales		W	f__Celastraceae;g__Euonymus
			o__Celastrales		H	f__Celastraceae;g__Parnassia
10	p__Angiospermae	Monocotyledoneae	o__Commelinales	1	H	f__Commelinaceae;g__Commelina
11	p__Angiospermae	Dicotyledoneae	o__Cornales	2	W	f__Hydrangeaceae;g__Hydrangea
			o__Cornales		W	f__Hydrangeaceae;g__Philadelphus
12	p__Angiospermae	Dicotyledoneae	o__Crossosomatales	1	W	f__Staphyleaceae;g__Euscaphis
13	p__Angiospermae	Dicotyledoneae	o__Cucurbitales	7	H	f__Cucurbitaceae;g__Benincasa
			o__Cucurbitales		H	f__Cucurbitaceae;g__Citrullus
			o__Cucurbitales		H	f__Cucurbitaceae;g__Cucumis
			o__Cucurbitales		H	f__Cucurbitaceae;g__Cucurbita
			o__Cucurbitales		H	f__Cucurbitaceae;g__Lagenaria
			o__Cucurbitales		H	f__Cucurbitaceae;g__Luffa
			o__Cucurbitales		H	f__Cucurbitaceae;g__Momordica
14	p__Angiospermae	Dicotyledoneae	o__Dipsacales	4	W1	f__Adoxaceae;g__Sambucus
			o__Dipsacales		W1	f__Adoxaceae;g__Viburnum
			o__Dipsacales		W1	f__Caprifoliaceae;g__Lonicera
			o__Dipsacales		W1	f__Caprifoliaceae;g__Weigela
15	p__Angiospermae	Dicotyledoneae	o__Ericales	10	W3	f__Actinidiaceae;g__Actinidia
			o__Ericales		H	f__Balsaminaceae;g__Impatiens
			o__Ericales		W2	f__Ebenaceae;g__Diospyros
			o__Ericales		H	f__Primulaceae;g__Androsace
			o__Ericales		W1	f__Primulaceae;g__Ardisia
			o__Ericales			f__Primulaceae;g__Dionysia
			o__Ericales		W3	f__Primulaceae;g__Embelia
			o__Ericales		H	f__Primulaceae;g__Lysimachia
			o__Ericales		W1	f__Symplocaceae;g__Symplocos
			o__Ericales		W1	f__Theaceae;g__Camellia
16	p__Angiospermae	Dicotyledoneae	o__Fabales	21	H	f__Fabaceae;g__Amorpha
			o__Fabales			f__Fabaceae;g__Andira
			o__Fabales		H	f__Fabaceae;g__Astragalus
			o__Fabales		W2	f__Fabaceae;g__Bauhinia
			o__Fabales		W1	f__Fabaceae;g__Caragana
			o__Fabales			f__Fabaceae;g__Eysenhardtia
			o__Fabales		H	f__Fabaceae;g__Glycine
			o__Fabales		W3	f__Fabaceae;g__Lablab
			o__Fabales		H	f__Fabaceae;g__Lespedeza
			o__Fabales		H	f__Fabaceae;g__Medicago
			o__Fabales		H	f__Fabaceae;g__Melilotus
			o__Fabales		H	f__Fabaceae;g__Oxytropis
			o__Fabales		W3	f__Fabaceae;g__Phanera
			o__Fabales		H	f__Fabaceae;g__Phaseolus
			o__Fabales		H	f__Fabaceae;g__Pisum
			o__Fabales			f__Fabaceae;g__Rafnia
			o__Fabales		W2	f__Fabaceae;g__Robinia
			o__Fabales			f__Fabaceae;g__Senna
			o__Fabales		W2	f__Fabaceae;g__Styphnolobium
			o__Fabales		H	f__Fabaceae;g__Vicia
			o__Fabales		H	f__Fabaceae;g__Vigna
17	p__Angiospermae	Dicotyledoneae	o__Fagales	11	W2	f__Betulaceae;g__Alnus
			o__Fagales		W2	f__Betulaceae;g__Betula
			o__Fagales		W2	f__Betulaceae;g__Carpinus
			o__Fagales		W1	f__Betulaceae;g__Ostryopsis
			o__Fagales		W2	f__Fagaceae;g__Castanea
			o__Fagales		W2	f__Fagaceae;g__Fagus
			o__Fagales		W2	f__Fagaceae;g__Lithocarpus
			o__Fagales		W2	f__Fagaceae;g__Quercus
			o__Fagales		W2	f__Juglandaceae;g__Carya
			o__Fagales		W2	f__Juglandaceae;g__Juglans
			o__Fagales		W2	f__Juglandaceae;g__Pterocarya
18	p__Angiospermae	Dicotyledoneae	o__Garryales	1	W2	f__Eucommiaceae;g__Eucommia
19	p__Angiospermae	Dicotyledoneae	o__Gentianales	4	H	f__Gentianaceae;g__Eustoma
			o__Gentianales		H	f__Rubiaceae;g__Galium
			o__Gentianales		H	f__Rubiaceae;g__Rubia
			o__Gentianales		W1	f__Rubiaceae;g__Wendlandia
20	p__Angiospermae	Dicotyledoneae	o__Geraniales	1	H	f__Geraniaceae;g__Geranium
21	p__Angiospermae	Dicotyledoneae	o__Lamiales	34	H	f__Acanthaceae;g__Ruellia
			o__Lamiales			f__Acanthaceae;g__Yeatesia
			o__Lamiales		H	f__Lamiaceae;g__Amethystea
			o__Lamiales		W1	f__Lamiaceae;g__Callicarpa
			o__Lamiales		H	f__Lamiaceae;g__Elsholtzia
			o__Lamiales		H	f__Lamiaceae;g__Eriophyton
			o__Lamiales		H	f__Lamiaceae;g__Hyptis
			o__Lamiales		H	f__Lamiaceae;g__Isodon
			o__Lamiales		H	f__Lamiaceae;g__Leonurus
			o__Lamiales		H	f__Lamiaceae;g__Mentha
			o__Lamiales		H	f__Lamiaceae;g__Ocimum
			o__Lamiales		H	f__Lamiaceae;g__Panzerina
			o__Lamiales		H	f__Lamiaceae;g__Salvia
			o__Lamiales		H	f__Lamiaceae;g__Scutellaria
			o__Lamiales		W1	f__Lamiaceae;g__Thymus
			o__Lamiales		W2	f__Lamiaceae;g__Vitex
			o__Lamiales		H	f__Mazaceae;g__Mazus
			o__Lamiales		W2	f__Oleaceae;g__Chionanthus
			o__Lamiales		W1	f__Oleaceae;g__Forsythia
			o__Lamiales		W2	f__Oleaceae;g__Fraxinus
			o__Lamiales		W1	f__Oleaceae;g__Ligustrum
			o__Lamiales		W2	f__Oleaceae;g__Olea
			o__Lamiales		W1	f__Oleaceae;g__Osmanthus
			o__Lamiales		W1	f__Oleaceae;g__Syringa
			o__Lamiales		W2	f__Paulowniaceae;g__Paulownia
			o__Lamiales		H	f__Pedaliaceae;g__Sesamum
			o__Lamiales		H	f__Plantaginaceae;g__Chaenorhinum
			o__Lamiales		H	f__Plantaginaceae;g__Kickxia
			o__Lamiales		H	f__Plantaginaceae;g__Linaria
			o__Lamiales		H	f__Plantaginaceae;g__Plantago
			o__Lamiales		H	f__Plantaginaceae;g__Veronica
			o__Lamiales		H	f__Scrophulariaceae;g__Leucophyllum
			o__Lamiales		H	f__Verbenaceae;g__Glandularia
			o__Lamiales		H	f__Verbenaceae;g__Junellia
22	p__Angiospermae	Monocotyledoneae	o__Liliales	1	H	f__Liliaceae;g__Lilium
23	p__Angiospermae	Dicotyledoneae	o__Malpighiales	12	H	f__Euphorbiaceae;g__Acalypha
			o__Malpighiales		H	f__Euphorbiaceae;g__Euphorbia
			o__Malpighiales		W1	f__Euphorbiaceae;g__Mallotus
			o__Malpighiales		W3	f__Passifloraceae;g__Passiflora
			o__Malpighiales		W2	f__Phyllanthaceae;g__Flueggea
			o__Malpighiales			f__Phyllanthaceae;g__Heterosavia
			o__Malpighiales		W2	f__Phyllanthaceae;g__Margaritaria
			o__Malpighiales		H	f__Phyllanthaceae;g__Phyllanthus
			o__Malpighiales		W1	f__Putranjivaceae;g__Lingelsheimia
			o__Malpighiales		W2	f__Salicaceae;g__Populus
			o__Malpighiales		W2	f__Salicaceae;g__Salix
			o__Malpighiales		W1	f__Salicaceae;g__Xylosma
24	p__Angiospermae	Dicotyledoneae	o__Malvales	11	H	f__Malvaceae;g__Abutilon
			o__Malvales		W1	f__Malvaceae;g__Brachychiton
			o__Malvales			f__Malvaceae;g__Cephalohibiscus
			o__Malvales		H	f__Malvaceae;g__Gossypium
			o__Malvales			f__Malvaceae;g__Hampea
			o__Malvales		W2	f__Malvaceae;g__Kydia
			o__Malvales			f__Malvaceae;g__Lebronnecia
			o__Malvales		W1	f__Malvaceae;g__Pavonia
			o__Malvales			f__Malvaceae;g__Peltaea
			o__Malvales		W2	f__Malvaceae;g__Theobroma
			o__Malvales		W2	f__Malvaceae;g__Tilia
25	p__Angiospermae	Dicotyledoneae	o__Myrtales	6	W2	f__Lythraceae;g__Lagerstroemia
			o__Myrtales		W2	f__Lythraceae;g__Punica
			o__Myrtales		H	f__Lythraceae;g__Rotala
			o__Myrtales		W2	f__Myrtaceae;g__Eucalyptus
			o__Myrtales		H	f__Onagraceae;g__Ludwigia
			o__Myrtales		H	f__Onagraceae;g__Oenothera
26	p__Angiospermae	Dicotyledoneae	o__Oxalidales	1	H	f__Oxalidaceae;g__Oxalis
27	p__Angiospermae	Monocotyledoneae	o__Poales	40	H	f__Cyperaceae;g__Carex
			o__Poales		H	f__Cyperaceae;g__Fimbristylis
			o__Poales		H	f__Cyperaceae;g__Schoenoplectus
			o__Poales		H	f__Poaceae;g__Aegilops
			o__Poales		H	f__Poaceae;g__Agrostis
			o__Poales		H	f__Poaceae;g__Alopecurus
			o__Poales		H	f__Poaceae;g__Beckmannia
			o__Poales		H	f__Poaceae;g__Bothriochloa
			o__Poales		H	f__Poaceae;g__Calamagrostis
			o__Poales		H	f__Poaceae;g__Catapodium
			o__Poales		H	f__Poaceae;g__Cenchrus
			o__Poales		H	f__Poaceae;g__Chloris
			o__Poales		H	f__Poaceae;g__Chrysopogon
			o__Poales		H	f__Poaceae;g__Cleistogenes
			o__Poales		H	f__Poaceae;g__Digitaria
			o__Poales		H	f__Poaceae;g__Dinebra
			o__Poales		H	f__Poaceae;g__Dupontia
			o__Poales		H	f__Poaceae;g__Echinochloa
			o__Poales		H	f__Poaceae;g__Eleusine
			o__Poales		H	f__Poaceae;g__Elymus
			o__Poales		H	f__Poaceae;g__Eragrostis
			o__Poales		H	f__Poaceae;g__Festuca
			o__Poales		H	f__Poaceae;g__Hordeum
			o__Poales		H	f__Poaceae;g__Imperata
			o__Poales		H	f__Poaceae;g__Lolium
			o__Poales		H	f__Poaceae;g__Oryza
			o__Poales		H	f__Poaceae;g__Phragmites
			o__Poales		H	f__Poaceae;g__Poa
			o__Poales		H	f__Poaceae;g__Pseudechinolaena
			o__Poales		H	f__Poaceae;g__Puccinellia
			o__Poales		H	f__Poaceae;g__Saccharum
			o__Poales		H	f__Poaceae;g__Saxipoa
			o__Poales		H	f__Poaceae;g__Schizachyrium
			o__Poales		H	f__Poaceae;g__Secale
			o__Poales		H	f__Poaceae;g__Sesleriella
			o__Poales		H	f__Poaceae;g__Setaria
			o__Poales		H	f__Poaceae;g__Sorghum
			o__Poales		H	f__Poaceae;g__Spodiopogon
			o__Poales		H	f__Poaceae;g__Triticum
			o__Poales		H	f__Poaceae;g__Zea
28	p__Angiospermae	Dicotyledoneae	o__Proteales	1	W2	f__Platanaceae;g__Platanus
29	p__Angiospermae	Dicotyledoneae	o__Ranunculales	7	W3	f__Menispermaceae;g__Menispermum
			o__Ranunculales		H	f__Papaveraceae;g__Chelidonium
			o__Ranunculales		H	f__Papaveraceae;g__Papaver
			o__Ranunculales		W3	f__Ranunculaceae;g__Clematis
			o__Ranunculales		H	f__Ranunculaceae;g__Dichocarpum
			o__Ranunculales		H	f__Ranunculaceae;g__Ranunculus
			o__Ranunculales		H	f__Ranunculaceae;g__Thalictrum
30	p__Angiospermae	Dicotyledoneae	o__Rosales	34	H	f__Cannabaceae;g__Cannabis
			o__Rosales		H	f__Cannabaceae;g__Humulus
			o__Rosales		W1	f__Cannabaceae;g__Trema
			o__Rosales		W1	f__Elaeagnaceae;g__Hippophae
			o__Rosales		W2	f__Moraceae;g__Broussonetia
			o__Rosales		W2	f__Moraceae;g__Ficus
			o__Rosales		W2	f__Moraceae;g__Maclura
			o__Rosales		W2	f__Moraceae;g__Morus
			o__Rosales			f__Rhamnaceae;g__Frangula
			o__Rosales		W2	f__Rhamnaceae;g__Rhamnus
			o__Rosales		W3	f__Rhamnaceae;g__Sageretia
			o__Rosales			f__Rhamnaceae;g__Ventia
			o__Rosales		W2	f__Rhamnaceae;g__Ziziphus
			o__Rosales		H	f__Rosaceae;g__Agrimonia
			o__Rosales		W2	f__Rosaceae;g__Cliffortia
			o__Rosales		W1	f__Rosaceae;g__Crataegus
			o__Rosales		W2	f__Rosaceae;g__Dasiphora
			o__Rosales		H	f__Rosaceae;g__Drymocallis
			o__Rosales		H	f__Rosaceae;g__Fragaria
			o__Rosales		H	f__Rosaceae;g__Malus
			o__Rosales		H	f__Rosaceae;g__Potentilla
			o__Rosales		W1	f__Rosaceae;g__Prunus
			o__Rosales		W2	f__Rosaceae;g__Pyrus
			o__Rosales		W1	f__Rosaceae;g__Rosa
			o__Rosales		H	f__Rosaceae;g__Sanguisorba
			o__Rosales			f__Rosaceae;g__Sibbaldianthe
			o__Rosales		W2	f__Rosaceae;g__Sorbus
			o__Rosales		W1	f__Rosaceae;g__Spiraea
			o__Rosales		W2	f__Ulmaceae;g__Ulmus
			o__Rosales		W2	f__Ulmaceae;g__Zelkova
			o__Rosales		W1	f__Urticaceae;g__Archiboehmeria
			o__Rosales		W1	f__Urticaceae;g__Boehmeria
			o__Rosales		W1	f__Urticaceae;g__Sarcochlamys
			o__Rosales		H	f__Urticaceae;g__Urtica
31	p__Angiospermae	Dicotyledoneae	o__Santalales	2	W3	f__Amphorogynaceae;g__Dendrotrophe
			o__Santalales		W2	f__Cervantesiaceae;g__Scleropyrum
32	p__Angiospermae	Dicotyledoneae	o__Sapindales	16	W1	f__Anacardiaceae;g__Cotinus
			o__Sapindales		W2	f__Anacardiaceae;g__Mangifera
			o__Sapindales		W2	f__Anacardiaceae;g__Pistacia
			o__Sapindales		W1	f__Anacardiaceae;g__Rhus
			o__Sapindales		H	f__Meliaceae;g__Heynea
			o__Sapindales		W2	f__Meliaceae;g__Toona
			o__Sapindales		W1	f__Nitrariaceae;g__Nitraria
			o__Sapindales		W2	f__Rutaceae;g__Citrus
			o__Sapindales		W2	f__Rutaceae;g__Zanthoxylum
			o__Sapindales		W2	f__Sapindaceae;g__Acer
			o__Sapindales			f__Sapindaceae;g__Cupania
			o__Sapindales		W2	f__Sapindaceae;g__Dimocarpus
			o__Sapindales		W2	f__Sapindaceae;g__Koelreuteria
			o__Sapindales		W2	f__Sapindaceae;g__Nephelium
			o__Sapindales		W2	f__Sapindaceae;g__Sapindus
			o__Sapindales		W2	f__Simaroubaceae;g__Ailanthus
33	p__Angiospermae	Dicotyledoneae	o__Saxifragales	6	H	f__Crassulaceae;g__Hylotelephium
			o__Saxifragales		H	f__Crassulaceae;g__Kalanchoe
			o__Saxifragales		H	f__Crassulaceae;g__Orostachys
			o__Saxifragales		H	f__Crassulaceae;g__Rhodiola
			o__Saxifragales		H	f__Crassulaceae;g__Sedum
			o__Saxifragales		W1	f__Paeoniaceae;g__Paeonia
34	p__Angiospermae	Dicotyledoneae	o__Solanales	22	H	f__Convolvulaceae;g__Calystegia
			o__Solanales		H	f__Convolvulaceae;g__Convolvulus
			o__Solanales		H	f__Convolvulaceae;g__Cuscuta
			o__Solanales		H	f__Convolvulaceae;g__Ipomoea
			o__Solanales		H	f__Convolvulaceae;g__Merremia
			o__Solanales			f__Solanaceae;g__Brunfelsia
			o__Solanales		W1	f__Solanaceae;g__Capsicum
			o__Solanales			f__Solanaceae;g__Cuatresia
			o__Solanales			f__Solanaceae;g__Deprea
			o__Solanales			f__Solanaceae;g__Dyssochroma
			o__Solanales			f__Solanaceae;g__Juanulloa
			o__Solanales			f__Solanaceae;g__Leucophysalis
			o__Solanales		W1	f__Solanaceae;g__Lycianthes
			o__Solanales		W1	f__Solanaceae;g__Lycium
			o__Solanales			f__Solanaceae;g__Markea
			o__Solanales		H	f__Solanaceae;g__Nicandra
			o__Solanales		H	f__Solanaceae;g__Nicotiana
			o__Solanales			f__Solanaceae;g__Nierembergia
			o__Solanales		H	f__Solanaceae;g__Physalis
			o__Solanales		H	f__Solanaceae;g__Solanum
			o__Solanales			f__Solanaceae;g__Trianaea
			o__Solanales			f__Solanaceae;g__Witheringia
35	p__Angiospermae	Dicotyledoneae	o__Vitales	2	W3	f__Vitaceae;g__Ampelopsis
			o__Vitales		W3	f__Vitaceae;g__Vitis
36	p__Angiospermae	Monocotyledoneae	o__Zingiberales	1	H	f__Musaceae;g__Musa
37	p__Angiospermae	Dicotyledoneae	o__Zygophyllales	1	H	f__Zygophyllaceae;g__Tribulus
38	p__Gymnospermae	Coniferopsida	o__Cupressales	2	W	f__Cupressaceae;g__Juniperus
			o__Cupressales		W	f__Cupressaceae;g__Platycladus
39	p__Gymnospermae	Coniferopsida	o__Pinales	6	W	f__Pinaceae;g__Abies
			o__Pinales		W	f__Pinaceae;g__Cedrus
			o__Pinales		W	f__Pinaceae;g__Larix
			o__Pinales		W	f__Pinaceae;g__Picea
			o__Pinales		W	f__Pinaceae;g__Pinus
			o__Pinales		W	f__Pinaceae;g__Pseudotsuga
