# Supplementary material for: Windborne migration amplifies insect-mediated pollination services
Source: eLife. 2022 Apr 13;11:e76230. doi: 10.7554/eLife.76230 (PMC9042232; doi:10.7554/eLife.76230)
Supplement: Supplementary file 2. [file elife-76230-supp2.xlsx]

## Sheet: result
Sample	PE_reads	Nochimera	Anotion	AvgLen_bp	GC	group
WK8_17	367	311	225	418.41	51.69	Apr.
WK8_18	6295	5862	5689	417.82	53.96	Apr.
WK8_19	906	783	767	448.06	54.59	Apr.
WK8_20	14817	13947	13786	413.57	54.6	Apr.
WK8_21	818	697	456	444.79	58.71	Apr.
WK8_24	4517	4233	4206	422.42	54.69	Apr.
WK8_26	1939	1614	1044	450.53	60.75	Apr.
WK8_27	726	625	620	453.02	59.25	Apr.
WK8_29	7278	6618	6596	452.85	53.71	Apr.
WK8_30	272	218	214	445.61	58.47	Apr.
WK8_35	3512	3096	3090	457.88	56.03	Apr.
WK8_36	2864	2659	2652	446.84	54.03	Apr.
WK8_37	3083	2792	1799	443.13	57.93	Apr.
WK1_23	5990	5217	5043	453.4	56.24	AS
WK1_24	4862	4357	4348	451.87	56.27	AS
WK1_25	9951	8889	8822	445.91	57.28	AS
WK1_26	5095	4718	4713	439.05	54.59	AS
WK1_27	6104	5338	5333	453.1	57.08	AS
WK1_28	4382	3588	3583	455.81	59.75	AS
WK1_29	3419	2804	2802	456.49	59.96	AS
WK2_35	186	154	152	444.85	55.97	Aug.
WK2_36	929	825	823	443.65	58.31	Aug.
WK2_38	3469	2972	2956	446.79	56.23	Aug.
WK5_15	439	391	388	447.1	56.02	Aug.
WK5_23	2532	2311	626	448.3	54.22	Aug.
WK5_24	2766	2256	2176	449.16	55.18	Aug.
WK5_28	559	496	492	449.04	57.14	Aug.
WK6_16	14725	13007	12709	436.9	58.17	Aug.
WK6_17	6253	4896	4825	449.76	57.77	Aug.
WK7_62	1149	969	953	454.56	55.05	Aug.
WK7_63	609	483	161	426.47	44.75	Aug.
WK7_64	799	663	607	441.04	56.64	Aug.
WK7_65	524	410	316	428.72	51.88	Aug.
WK7_66	1290	1100	1092	448.32	56.25	Aug.
WK7_67	1877	1643	1606	446.29	55.32	Aug.
WK7_68	1105	479	465	454.04	55.49	Aug.
WK7_69	2435	2113	2064	449.76	56.77	Aug.
WK7_70	2539	2258	2240	451.33	55.28	Aug.
WK7_71	781	686	659	444.27	57.42	Aug.
WK7_72	6502	5601	5568	454.94	55.99	Aug.
WK7_73	32107	28747	28582	436.81	56.06	Aug.
WK7_74	5642	5088	5051	447.81	54.43	Aug.
WK7_75	16861	15346	15332	453.42	52.68	Aug.
WK7_76	3818	3323	3319	443.17	59.38	Aug.
WK7_77	19871	16961	16693	449.47	56.7	Aug.
WK7_78	14076	11889	10947	443.63	57.28	Aug.
WK7_79	6945	6248	6076	432.1	56.39	Aug.
WK7_80	2172	1865	1847	445.94	56.46	Aug.
WK3_2	3869	2999	2960	445.37	62.49	CC
WK3_3	5035	4333	4325	450.54	56.46	CC
WK3_4	1425	1209	1182	451.35	56.57	CC
WK3_5	9569	8522	8519	450.41	54.91	CC
WK3_6	4489	3712	3474	452.81	54.05	CC
WK3_7	3661	2927	2926	446.14	58.83	CC
WK3_9	1597	1456	55	446.93	49.4	CC
WK3_10	1766	1478	1478	452.84	53.34	CC
WK3_11	1259	1088	1087	449.43	58.41	CC
WK3_12	1016	854	585	433.51	58.74	CC
WK3_14	1715	1561	1548	423.75	54.67	CC
WK3_15	1981	1745	1736	427.88	55.2	CC
WK3_16	1796	1619	1618	430.41	54.72	CC
WK3_17	12160	9910	9902	428.14	55.82	CC
WK3_18	9447	8358	8325	447.56	55.37	CC
WK3_19	5670	5112	5110	420.47	55.1	CC
WK3_20	1124	1015	987	429.63	55.4	CC
WK3_21	5116	4409	4378	445.4	54.9	CC
WK3_22	8720	7813	7594	437.72	54.97	CC
WK3_23	2478	2222	2222	449.37	53.44	CC
WK3_24	11909	10089	10088	439.13	60.66	CC
WK3_25	214	176	176	446.89	56.02	CC
WK3_26	963	828	734	446.37	56.83	CC
WK6_30	8667	7562	7462	443	57.85	CF
WK6_31	13135	10939	10852	464.03	61.77	CF
WK6_32	11244	9712	9644	448.4	55.51	CF
WK6_33	19142	16050	15971	453.18	57.42	CF
WK6_34	6516	5736	5640	452.2	53.18	CF
WK6_35	19798	16663	16614	446.24	57.57	CF
WK6_36	4946	4438	4433	451.87	54.55	CF
WK6_37	1012	881	881	455.5	60.15	CF
WK6_38	10659	8987	8909	457.18	61.22	CF
WK6_42	16019	13554	13539	434.65	57.93	CF
WK6_43	12687	11397	11379	453.55	53.92	CF
WK6_44	10201	8504	8497	443.51	57.83	CF
WK6_45	1935	1619	1580	445.2	57.16	CF
WK6_46	13257	11388	11372	442.18	54.93	CF
WK6_47	21271	18092	17953	439.87	59.67	CF
WK6_48	16790	14787	14766	448.98	55.66	CF
WK6_49	15386	13883	13882	453.95	50.7	CF
WK6_50	18860	16914	16907	451.78	51.57	CF
WK6_51	891	814	791	449.73	54.75	CF
WK6_52	1192	1073	1065	450.61	59.5	CF
WK6_53	5091	4515	4512	453.39	51.59	CF
WK6_55	13955	12295	12276	451.71	54.79	CF
WK6_56	21450	18054	17661	452.49	52.36	CF
WK6_57	5877	5196	5078	450.23	55.39	CF
WK6_58	19463	17662	17649	451.26	54.35	CF
WK1_61	4649	4418	4336	416.71	54.63	CZ
WK1_62	201	189	178	418.49	53.95	CZ
WK1_63	5745	5471	5455	416.77	54.73	CZ
WK1_64	2427	2296	2112	418.37	54.26	CZ
WK1_65	4193	3900	3518	417.48	54.24	CZ
WK1_66	2867	2710	2658	416.97	54.56	CZ
WK1_67	3234	2909	2904	454.42	53.86	CZ
WK1_68	1726	1619	1608	417.9	53.32	CZ
WK1_70	1073	1009	900	420.01	54.09	CZ
WK1_71	1240	1126	1077	421.81	54.2	CZ
WK1_72	16909	15359	15351	445.4	57.41	CZ
WK1_73	8557	7933	7905	432.91	54.36	CZ
WK1_74	3965	3743	3573	419.55	54.44	CZ
WK1_75	6202	5768	5763	438.15	54.11	CZ
WK1_76	3325	3098	2902	419.89	54.44	CZ
WK1_77	6108	5430	5426	452.46	55.23	CZ
WK1_78	2425	2216	2067	425.24	54.21	CZ
WK1_79	3990	3610	3498	441.44	56.08	CZ
WK1_80	6637	6111	6082	424.17	54.67	CZ
WK1_81	8517	7974	7956	439.61	54.09	CZ
WK1_82	5533	5024	5021	424.06	54.9	CZ
WK1_83	188	172	167	418.47	54.19	CZ
WK6_1	5629	5060	5049	449.75	54.93	DY
WK6_2	4858	4096	4083	452.57	57.8	DY
WK6_5	10003	8329	8317	451.36	54.48	DY
WK6_6	7228	5724	5715	442.32	57.89	DY
WK6_7	10681	8843	8786	453.86	56.01	DY
WK6_8	6713	5821	5773	453.83	56.33	DY
WK6_9	2324	1907	1907	455.8	56.11	DY
WK6_10	7856	6743	6221	437.45	54.28	DY
WK6_11	2457	2166	2094	447.7	55.46	DY
WK6_12	4207	3614	3595	448.72	56.62	DY
WK6_13	9525	7567	7558	449.42	61.3	DY
WK6_14	4636	4158	3355	450.17	56.53	DY
WK6_15	2600	2257	2256	451.24	53.96	DY
WK6_18	10829	8906	8887	441.28	61.8	DY
WK6_19	10798	9508	257	445.02	58.65	DY
WK6_20	13575	11798	11786	449.13	58.1	DY
WK6_21	8173	7091	6448	447.55	55.74	DY
WK6_22	10630	9182	9176	449.61	55.95	DY
WK6_24	6922	6026	5874	448.97	56.28	DY
WK6_25	6272	5385	5367	449.64	54.96	DY
WK6_26	8514	7550	7548	448.07	54.24	DY
WK6_27	4132	2681	2675	442.42	59.59	DY
WK6_28	1021	868	868	454.94	56.49	DY
WK6_29	2726	2354	2350	453.58	56.52	DY
WK5_31	5110	4728	4727	451.97	52.88	HB
WK5_32	5795	5106	5106	442.89	57.53	HB
WK5_33	6869	6249	6249	451.6	53.2	HB
WK5_36	1816	1630	1629	451.15	55.04	HB
WK5_37	1155	1062	1055	447.93	54.22	HB
WK5_38	6221	5359	5207	448.61	56.39	HB
WK5_42	1030	935	932	445.65	54.32	HB
WK5_43	5269	4804	4802	450.15	54.4	HB
WK5_44	1348	1219	1205	442.15	55.57	HB
WK5_45	2441	2117	2117	449.9	55.2	HB
WK5_47	9774	8829	8818	446.09	55.88	HB
WK5_50	10698	9539	9529	449.55	54.98	HB
WK5_51	5278	4885	4879	451.88	53.03	HB
WK5_52	5162	4688	4681	449.97	54.92	HB
WK5_53	7154	6306	6306	448.56	55.26	HB
WK5_54	15414	13187	13184	434.65	59.69	HB
WK5_55	8232	7337	7280	451.41	54.49	HB
WK5_56	7661	6757	2546	447.28	54.05	HB
WK5_57	6761	6298	6296	451.8	53.08	HB
WK5_58	9128	8455	8447	450.82	53.87	HB
WK5_59	9212	8503	8501	451.95	52.81	HB
WK7_51	113	101	100	457.85	54.11	Jun.
WK7_52	4684	4275	4251	434.13	58.5	Jun.
WK7_53	7874	6819	6812	445	59.21	Jun.
WK7_54	573	501	487	456.25	54.52	Jun.
WK7_55	6192	5433	5252	456.62	55.11	Jun.
WK7_56	11548	9707	9688	448.37	55.81	Jun.
WK7_58	15145	13838	13384	440.04	57.87	Jun.
WK7_59	15224	13643	13576	440.4	59.58	Jun.
WK7_60	3281	2882	2733	455.27	53.96	Jun.
WK8_59	3148	2712	2682	453.55	57.53	Jun.
WK8_60	1694	1554	1538	450.95	52.03	Jun.
WK8_61	3308	3014	2982	444.32	56.88	Jun.
WK8_62	2483	2075	2065	445.88	59.47	Jun.
WK8_63	13457	12012	11851	446.74	57.39	Jun.
WK8_64	1778	1554	1399	448.63	57.72	Jun.
WK8_66	5886	5152	3288	446.09	59.8	Jun.
WK8_67	2631	1990	1065	433.71	50.44	Jun.
WK8_68	1491	1296	1259	447.87	58.32	Jun.
WK8_69	5664	4931	4772	442.51	57.87	Jun.
WK8_70	4716	4270	4219	441.26	58.21	Jun.
WK8_71	7701	7004	6947	436.3	57.5	Jun.
WK8_72	9791	9002	8922	439.12	56.84	Jun.
WK8_73	2539	2111	1824	444.28	57.79	Jun.
WK4_60	15647	14216	14206	448.8	54.71	LF
WK4_61	2094	1939	1922	442.92	55.12	LF
WK4_62	895	812	761	423.72	55.48	LF
WK4_63	1638	1450	1449	432.58	55.02	LF
WK4_65	1424	1263	1218	435.41	55.85	LF
WK4_66	2004	1858	1856	424.34	54.57	LF
WK4_67	10180	8755	8740	454.66	56.09	LF
WK4_68	7467	6812	6810	445.75	58.23	LF
WK4_69	322	289	285	433.65	56.58	LF
WK4_70	4814	4344	4335	446.61	56.52	LF
WK4_71	1003	907	896	422.37	54.94	LF
WK4_72	3044	2664	2659	454.98	55.97	LF
WK4_73	13016	11662	11646	442.64	58.07	LF
WK4_75	10977	10001	9998	454.94	53.76	LF
WK4_76	18950	17310	17303	434.77	57.67	LF
WK4_77	14477	12405	12404	456.79	55.92	LF
WK4_78	17963	15564	15561	435.18	57.57	LF
WK4_79	2552	2300	2299	448.86	55.98	LF
WK4_80	12903	10312	10312	438.98	63.36	LF
WK4_81	20615	18862	18860	447.76	58.79	LF
WK3_88	1115	948	946	456.26	60.56	May
WK3_89	2710	2362	2268	444.37	55.77	May
WK3_90	1164	930	867	448	55.04	May
WK4_83	3285	2871	2865	448.76	55.8	May
WK4_84	6736	5980	5975	447.61	55.12	May
WK4_85	7591	6911	5583	443.98	57.53	May
WK4_86	1856	1653	1518	447.81	54.8	May
WK4_87	1553	1389	1372	449.04	56.08	May
WK4_88	532	466	463	439.89	57.83	May
WK4_89	1457	1287	1257	442.11	56.15	May
WK4_90	3306	2749	2720	448.98	56.4	May
WK6_88	6124	5351	5351	449.03	56.18	May
WK7_36	8136	7273	7265	450.92	60.45	May
WK7_42	14172	12776	12734	446.55	60.16	May
WK7_43	2315	2073	1997	461.16	54.36	May
WK7_44	20476	19277	19152	420.48	53.69	May
WK7_45	5080	4268	4267	460.82	55.94	May
WK7_46	4258	3674	2963	466.73	52.83	May
WK7_47	1912	1677	1643	444.78	56	May
WK7_48	336	292	246	447.52	53.87	May
WK7_49	1737	1523	1519	457.73	54.62	May
WK7_50	6736	5894	5886	460.28	54.31	May
WK8_38	26420	23955	23748	451.22	53.64	May
WK8_42	1184	1062	921	449.52	56.79	May
WK8_44	1822	1669	1648	436.13	56.26	May
WK8_45	938	753	599	446.54	55.37	May
WK8_46	4857	4112	3996	443.53	58.37	May
WK8_47	1405	265	151	425.62	49.83	May
WK8_48	403	361	359	452.15	55.4	May
WK8_49	290	233	233	447.87	61.59	May
WK8_50	776	694	598	440.59	55.36	May
WK8_52	7994	7407	7376	451.08	55.44	May
WK8_53	5430	4757	4592	461.48	55.45	May
WK8_54	16465	14397	14374	445.56	54.9	May
WK8_55	1632	1395	1369	450.56	57.65	May
WK8_56	1149	878	562	443.38	49.47	May
WK8_57	7047	6283	5523	459.88	53.1	May
WK8_58	12922	11566	11498	461.85	57.12	May
WK8_79	610	527	431	431.48	56.42	May
WK8_80	10564	9285	8705	448.44	54.92	May
WK8_81	11313	10246	10156	451.76	54.62	May
WK8_82	9555	8133	7870	450.51	57.75	May
WK8_83	5500	4789	4687	444.73	57.53	May
WK8_84	1669	1462	1420	441.15	56.33	May
WK8_85	4546	4064	3560	451.8	55.63	May
WK8_86	7737	6666	3761	459.3	56.11	May
WK8_87	5116	4478	4064	446.04	54.47	May
WK8_88	3460	3064	3044	444.95	60.26	May
WK8_89	5494	4885	4411	443.15	54.85	May
WK5_61	11797	9881	9881	463.67	62.99	NC
WK5_62	3872	3277	3263	449.68	57.07	NC
WK5_63	8612	7767	7747	452.49	54.8	NC
WK5_64	6318	5562	5561	449.94	59.7	NC
WK5_65	5011	4460	4445	447.12	55.56	NC
WK5_66	4228	3761	3761	449.36	53.44	NC
WK5_67	10089	6389	6376	449.15	60.27	NC
WK5_68	2656	2361	2361	453.71	56.7	NC
WK5_69	465	376	327	443.65	61.64	NC
WK5_70	1220	1054	813	449.39	60.39	NC
WK5_71	812	691	689	450.49	59.98	NC
WK5_72	7299	6567	6367	452.51	53.44	NC
WK5_73	2163	1879	1659	445.89	59.22	NC
WK5_74	684	607	583	450.16	59.38	NC
WK5_75	3637	3230	3229	457.57	57.63	NC
WK5_76	644	567	527	451.95	58.15	NC
WK5_77	3965	3505	3502	450.88	57.23	NC
WK5_78	4027	3402	3395	454.49	57.48	NC
WK5_79	954	850	846	448.25	56.38	NC
WK5_80	9727	8209	7862	456.56	57.52	NC
WK5_81	4709	4011	3999	459.2	59.53	NC
WK5_82	6886	5920	5919	454.75	55.98	NC
WK5_83	1143	967	962	449.99	57.46	NC
WK5_86	935	830	805	450.03	58.66	NC
WK5_87	8927	8029	7887	449.31	54.29	NC
WK5_88	2913	2465	2452	435.65	60.3	NC
WK5_89	397	363	342	439.8	56.93	NC
WK5_90	14121	11866	11792	452.42	55.98	NC
WK1_85	863	765	713	447.97	53.96	Oct.
WK1_86	193	179	158	444.04	56.83	Oct.
WK1_87	1552	1394	1380	448.02	54.01	Oct.
WK1_90	3456	2986	2984	448.27	53.42	Oct.
WK6_84	4193	3732	3732	447.95	54.55	Oct.
WK7_14	1546	1377	1376	447.85	53.31	Oct.
WK7_15	13380	11647	11606	447.61	53.48	Oct.
WK7_16	1057	928	816	443.51	52.97	Oct.
WK7_17	11267	9337	9313	447.88	53.42	Oct.
WK7_18	779	638	623	448.35	56.44	Oct.
WK7_19	1753	1499	1491	449.11	54.87	Oct.
WK7_20	24115	21819	21735	447.49	53.21	Oct.
WK7_21	11147	9700	9684	447.56	53.22	Oct.
WK7_22	1357	1146	1119	446.18	55	Oct.
WK7_23	4118	3664	2552	447.27	57.51	Oct.
WK7_24	391	303	292	447.55	55.86	Oct.
WK7_25	8799	7646	7627	448.25	53.24	Oct.
WK7_26	199	155	151	448.59	54.81	Oct.
WK7_28	5742	5175	5162	447.73	53.24	Oct.
WK7_29	8443	7635	7632	447.97	53.17	Oct.
WK7_30	7980	7032	6988	447.54	53.33	Oct.
WK7_31	2265	1970	1930	447.98	54.4	Oct.
WK7_32	385	324	240	434.67	54.49	Oct.
WK7_33	8454	7360	7344	447.61	53.28	Oct.
WK7_34	428	322	169	423.22	56.13	Oct.
WK2_1	4956	4466	4465	447.18	54.15	PE
WK2_2	4336	3952	3947	441.69	57.74	PE
WK2_3	6895	6257	6234	439.01	56.99	PE
WK2_4	1792	1593	1539	438.45	55.68	PE
WK2_5	7017	6372	5939	429.02	54.37	PE
WK2_6	7861	6827	6823	439.92	57.36	PE
WK2_7	13311	11928	11722	436.3	57.13	PE
WK2_8	10529	9576	9565	442.74	57.09	PE
WK2_9	1818	1621	1614	449.74	55.25	PE
WK2_10	12852	11651	11121	424.28	53.91	PE
WK2_11	6819	6348	5946	422.97	53.99	PE
WK2_12	7507	6765	6758	454.21	53.63	PE
WK2_13	5560	5178	4250	420.13	54.62	PE
WK2_14	7014	6442	6188	440.49	55.87	PE
WK2_15	9548	8741	8691	438.12	56.03	PE
WK2_16	10992	10111	10095	446.62	53.84	PE
WK2_17	7989	6975	6963	441.09	57.78	PE
WK2_18	12057	11104	11098	441.56	56.08	PE
WK2_19	10039	8837	8817	455.51	57.54	PE
WK2_20	13886	11981	11372	452.61	62.13	PE
WK2_21	7161	6612	6335	425.95	54.06	PE
WK2_22	360	336	282	418.02	54.08	PE
WK2_23	7825	7314	7229	423.83	57.68	PE
WK2_24	12640	11659	11654	449.13	55.26	PE
WK2_25	7886	6984	6966	450.36	53.53	PE
WK2_26	2261	2108	1881	423.87	53.65	PE
WK2_27	14653	13653	13586	413.97	54.54	PE
WK2_28	8517	7881	7840	423.8	57.95	PE
WK2_29	4929	4576	4536	447.26	53.05	PE
WK5_46	1906	1703	1663	445.29	55.82	Sep.
WK6_85	5859	5184	5171	449.71	56.56	Sep.
WK6_86	12834	11403	11392	456.96	61.02	Sep.
WK6_87	2721	2367	2312	448.63	55.8	Sep.
WK7_1	269	222	205	447.68	56.92	Sep.
WK7_2	1708	1471	1471	447.66	53.29	Sep.
WK7_3	1852	1605	1596	452.07	53.96	Sep.
WK7_5	2595	2233	2094	446.47	54.75	Sep.
WK7_6	696	574	533	448.54	56.46	Sep.
WK7_7	194	163	161	446.23	56.28	Sep.
WK7_8	1800	1560	1531	447.62	57.69	Sep.
WK7_10	431	348	340	449.01	56.39	Sep.
WK7_11	485	403	245	441.67	50.63	Sep.
WK7_12	252	205	182	447.93	55.73	Sep.
WK7_13	10757	9539	9514	447.83	53.19	Sep.
WK7_81	1531	1245	1161	432.94	56.53	Sep.
WK7_82	6552	5539	5232	446.6	55.14	Sep.
WK7_83	17986	15317	15260	455.74	60.83	Sep.
WK7_84	3391	2962	2563	449.47	56.57	Sep.
WK7_85	3561	3272	1966	448.26	55.66	Sep.
WK7_86	18739	16664	16662	449.22	56.23	Sep.
WK7_87	12100	10912	10833	450.03	55.93	Sep.
WK7_88	1975	1750	1715	448.21	56.06	Sep.
WK7_89	3475	3024	1948	424.36	53.92	Sep.
WK7_90	6553	5361	4642	437	54.45	Sep.
WK8_2	6191	5309	5293	456.27	56.15	Sep.
WK8_3	3945	3419	3265	456.08	53.12	Sep.
WK8_4	3976	3363	3338	456.07	60.84	Sep.
WK8_5	2300	1844	1809	450.47	55.75	Sep.
WK8_8	4511	3959	3427	443.43	52.82	Sep.
WK8_9	210	191	185	453.08	54.37	Sep.
WK8_10	839	709	699	443.75	56.57	Sep.
WK8_11	269	234	167	445.16	53.01	Sep.
WK8_12	3617	3245	3202	444.9	56.74	Sep.
WK8_13	7545	6926	6893	449.16	55.39	Sep.
WK8_14	577	505	494	451.45	56.54	Sep.
WK8_74	6259	5657	5404	447.31	54.5	Sep.
WK8_75	6659	5954	4102	439.82	51.5	Sep.
WK8_76	15913	14251	11981	448.06	56.95	Sep.
WK8_77	12870	11166	9452	438.19	55.06	Sep.
WK8_78	7249	3721	2068	412.74	49.45	Sep.
WK8_90	15852	12804	12689	455.41	60.31	Sep.
WK1_1	2938	2716	2716	413.97	54.23	SH
WK1_2	5042	4273	4261	452.56	59.54	SH
WK1_3	5744	5014	4996	449.85	57.74	SH
WK1_4	2801	2561	2561	413.98	54.22	SH
WK1_5	7143	6603	6602	414.49	54.17	SH
WK1_6	8226	6735	6734	443.97	56.87	SH
WK1_7	10279	8998	8993	447.48	54.28	SH
WK1_8	6785	6082	6081	448.25	54.16	SH
WK1_9	1797	1538	1516	444.11	54.51	SH
WK1_10	6103	5242	2988	447.72	57.23	SH
WK1_11	1452	1316	1312	443.2	54.6	SH
WK1_12	6200	5367	4888	444.58	56.87	SH
WK1_13	6349	5732	5728	450.11	56.17	SH
WK1_14	1886	1629	1628	450.92	57.6	SH
WK1_16	2629	2325	2321	449.37	56.26	SH
WK1_17	1946	1622	1619	442.55	55.66	SH
WK1_18	7830	7007	5047	446.73	55.6	SH
WK1_20	2829	2547	2503	445	56.13	SH
WK1_21	1633	1419	1349	450.99	57.49	SH
WK5_1	999	895	895	446.2	52.27	SY
WK5_2	402	353	353	450.27	54.65	SY
WK5_3	572	510	503	447.46	54.45	SY
WK5_5	909	808	807	448.05	54.68	SY
WK5_6	11526	9367	9359	434.07	60.23	SY
WK5_7	878	766	682	448.03	57.34	SY
WK5_8	492	442	442	450.16	55.12	SY
WK5_9	1602	1405	1405	453.79	53.26	SY
WK5_12	757	691	120	423.15	54.4	SY
WK5_13	2761	2535	2532	446.17	55.92	SY
WK5_14	5600	5112	5112	452.84	53.17	SY
WK5_16	11564	10144	10124	451.67	58.83	SY
WK5_17	10554	9045	9045	453.93	52.76	SY
WK5_18	12426	11482	11482	448.99	54.93	SY
WK5_19	803	751	177	447.11	50.71	SY
WK5_20	5858	5461	5451	450.75	55.05	SY
WK5_21	334	288	288	441.11	60.03	SY
WK5_22	5717	5024	5014	447.57	53.33	SY
WK5_25	488	423	423	454.44	54.54	SY
WK5_26	4825	4460	4459	453.58	52.77	SY
WK5_27	8677	7891	7887	447.9	53.32	SY
WK5_29	1851	1682	1677	447.91	55.2	SY
WK4_33	8816	7870	7868	444.34	57.35	TZ
WK4_34	7396	6941	6105	415.29	54.03	TZ
WK4_35	279	252	251	436.33	59.65	TZ
WK4_36	3408	3184	3013	426.35	54.77	TZ
WK4_37	8550	7975	7888	429.68	53.91	TZ
WK4_38	16941	15268	14793	439.05	56.7	TZ
WK4_42	3368	3152	2097	418.49	53.99	TZ
WK4_43	853	803	493	414.82	53.63	TZ
WK4_44	404	386	297	423.11	53.93	TZ
WK4_45	12227	11427	11399	419.63	54.58	TZ
WK4_46	13027	11532	7545	441.51	58.9	TZ
WK4_47	232	213	200	433.85	55.75	TZ
WK4_48	2666	2451	1961	418.58	54.2	TZ
WK4_49	12265	10840	10810	436.84	59.82	TZ
WK4_51	8473	7884	5983	414.85	54.18	TZ
WK4_52	208	186	165	435.57	55.75	TZ
WK4_53	735	637	618	438.21	56.38	TZ
WK4_54	1505	1337	1099	422.72	54.82	TZ
WK4_55	4907	4495	1971	414.24	53.64	TZ
WK4_56	717	636	523	417.63	54.62	TZ
WK4_59	1657	1508	1126	428.79	55.34	TZ
WK3_59	4267	3681	3615	444.12	54.33	WH
WK3_60	8254	6854	6589	450.32	59.04	WH
WK3_61	2582	2292	2289	448.69	56.36	WH
WK3_62	2051	1824	1822	440.65	54.45	WH
WK3_63	890	767	739	442.77	56.98	WH
WK3_64	1099	934	934	444.46	57.15	WH
WK3_65	2232	1894	1533	428.07	57.01	WH
WK3_66	1399	1180	1179	450.25	58.53	WH
WK3_68	102	96	91	442.9	56.15	WH
WK3_70	1511	1342	1337	450.44	56.15	WH
WK3_71	626	552	487	447.78	55.54	WH
WK3_72	10968	9257	9253	456.53	55.99	WH
WK3_73	3857	3203	3193	453.55	57.56	WH
WK3_74	523	452	452	453.89	58.58	WH
WK3_75	5916	5286	5017	446.72	56.66	WH
WK3_76	6939	5716	4845	457.6	61.65	WH
WK3_77	11529	10027	10020	452.31	54.02	WH
WK3_78	11391	9644	9483	448.8	56.15	WH
WK3_80	2511	2202	1859	422.56	54.16	WH
WK3_81	1373	1192	1191	448.97	56.45	WH
WK3_82	1997	1595	1521	448.33	55.5	WH
WK3_84	4816	4260	4245	442.6	54.44	WH
WK3_85	4518	4126	3892	428.11	55.01	WH
WK3_87	11049	9886	9512	440.3	55.04	WH
WK3_27	6796	5733	5560	453.64	55.85	XJ
WK3_28	666	616	410	428.25	54.32	XJ
WK3_29	1283	1087	1069	456.57	55.21	XJ
WK3_30	3525	3097	2893	437.43	54.88	XJ
WK3_31	4116	3544	3409	449.3	56.82	XJ
WK3_32	2602	2227	2183	446.84	56.22	XJ
WK3_33	1657	1299	1298	454.65	58.57	XJ
WK3_34	1411	1168	1128	450.43	57.84	XJ
WK3_35	1987	1747	1728	452.26	56.94	XJ
WK3_36	352	318	311	445.14	56	XJ
WK3_37	7956	6980	6613	435.04	60.75	XJ
WK3_38	3312	2816	2012	424.94	54.83	XJ
WK3_42	699	626	550	431.78	55.98	XJ
WK3_43	114	95	81	443.68	56.01	XJ
WK3_44	707	619	562	440.12	56.93	XJ
WK3_45	3562	2975	2826	444.59	56.98	XJ
WK3_46	2333	2009	2005	445.98	57.18	XJ
WK3_47	10683	8022	7306	452.85	61.95	XJ
WK3_48	2827	2381	2324	445.99	57.42	XJ
WK3_49	625	488	466	451.89	61.42	XJ
WK3_50	2961	2382	2351	455.55	56.36	XJ
WK3_51	762	661	610	442.29	56.75	XJ
WK3_52	4691	4266	4200	451.13	51.24	XJ
WK3_53	1712	1427	1305	448.32	55.5	XJ
WK3_54	4195	3593	3108	432.78	55.64	XJ
WK3_55	9523	8299	8297	450.71	54.31	XJ
WK3_56	5311	4637	4579	419.51	53.98	XJ
WK3_57	2589	2264	2242	445.16	56.06	XJ
WK3_58	1790	1638	1590	431.6	55.77	XJ
WK2_31	1134	1055	880	419.33	53.34	XX
WK2_33	2638	2412	2412	451.26	51.25	XX
WK2_34	2532	2304	2302	451.8	53.19	XX
WK2_37	1093	1019	1018	449.67	52.49	XX
WK2_43	4597	4250	4249	436.14	56.28	XX
WK2_44	950	837	834	444.19	54.85	XX
WK2_45	2143	1783	1783	445.34	56.22	XX
WK2_46	7688	6694	6682	456.11	55.8	XX
WK2_47	311	284	284	447	54	XX
WK2_48	217	173	167	442.59	60.21	XX
WK2_50	6122	5355	5354	455.75	56.23	XX
WK2_51	3089	2743	2487	451.53	56.19	XX
WK2_52	6477	5929	5907	449.47	54.85	XX
WK2_53	7331	6715	6706	451.85	52.4	XX
WK2_54	11567	10419	10369	445.14	58.51	XX
WK2_55	368	336	335	450.43	55.15	XX
WK2_56	1790	1539	1535	447.68	54.72	XX
WK2_58	2623	2363	2314	450.46	55.96	XX
WK2_60	1584	1395	1387	452.07	55.93	XX
WK2_61	655	598	571	439.81	60.1	YL
WK2_62	2220	1979	1979	454.72	53.84	YL
WK2_63	6804	6189	6169	440.89	60.34	YL
WK2_64	5539	5103	5103	451.27	55.69	YL
WK2_65	3877	3447	3445	445.09	59.68	YL
WK2_66	4086	3708	3703	440.95	60.45	YL
WK2_67	4701	4217	4214	440.93	60.37	YL
WK2_68	3461	3173	3172	446.89	57.66	YL
WK2_69	29556	27057	10688	445.06	58.12	YL
WK2_70	2974	2701	2699	441.33	60.17	YL
WK2_71	4954	4473	4461	453.9	54.3	YL
WK2_72	747	666	666	456.49	55.99	YL
WK2_73	8222	7410	7407	441.15	60.2	YL
WK2_74	3189	2891	2889	440.96	60.47	YL
WK2_75	4406	4016	4012	446.18	57.1	YL
WK2_76	5618	5015	5011	440.29	61.45	YL
WK2_77	10536	9466	9413	440.74	60.53	YL
WK2_78	8503	7531	7523	440.85	60.29	YL
WK2_80	10404	9108	9105	440.99	60.55	YL
WK2_81	624	582	582	448.33	54.21	YL
WK2_82	4739	4182	4178	442.21	59.43	YL
WK2_83	9223	8211	8210	437.83	58.22	YL
WK2_84	785	701	690	459.15	55.68	YL
WK2_85	16477	15062	15036	440.97	60.5	YL
WK2_86	8812	7334	7325	442.09	58.37	YL
WK2_87	10716	9774	9760	440.9	60.54	YL
WK6_59	19952	18055	18054	451.57	54.12	YP
WK6_60	178	156	156	451.12	54.84	YP
WK6_61	1011	937	937	451.6	54.24	YP
WK6_62	685	576	565	446.08	58.22	YP
WK6_63	12592	11272	11243	450.36	53.08	YP
WK6_64	809	728	728	444.71	57.24	YP
WK6_67	572	517	515	449.51	55	YP
WK6_69	822	695	694	446.88	58.5	YP
WK6_72	11307	9830	9830	456.41	55.98	YP
WK6_73	528	455	442	448.73	57.21	YP
WK6_74	295	253	253	452.29	58.11	YP
WK6_75	1148	1027	967	450.1	55.51	YP
WK6_76	1218	1063	1002	450.6	56.93	YP
WK6_77	8241	7221	7200	448.48	55.41	YP
WK6_78	4878	4207	3306	448.58	57.64	YP
WK6_79	328	258	258	447.83	57.88	YP
WK6_80	1965	1707	1586	444.51	57.53	YP
WK6_81	4057	3579	3578	450.58	55.96	YP
WK6_82	6241	5235	4455	452.31	57.2	YP
WK4_1	215	192	178	421.08	54.68	YT
WK4_2	1764	1594	1503	428.4	55.51	YT
WK4_3	7489	6636	6618	440.29	55.57	YT
WK4_4	382	345	320	424.41	54.18	YT
WK4_5	811	731	620	429.76	54.86	YT
WK4_6	1061	922	806	424.2	55.01	YT
WK4_7	4526	4105	3920	424.33	55.49	YT
WK4_8	224	193	150	417.13	54.4	YT
WK4_9	302	267	260	437.91	56.69	YT
WK4_10	13693	11955	11952	451.93	56.31	YT
WK4_11	524	473	473	417.69	54.6	YT
WK4_12	3511	3224	3152	440.99	53.4	YT
WK4_13	12947	11290	11281	456.59	55.8	YT
WK4_14	2669	2414	2355	431.76	57.11	YT
WK4_15	3869	3315	3160	448.98	56	YT
WK4_16	7852	6882	6865	450.24	60.22	YT
WK4_17	11599	10022	9371	435.31	54.22	YT
WK4_18	8802	7803	7545	429.76	57.99	YT
WK4_19	3432	2761	2735	450.71	58.58	YT
WK4_20	3604	3342	2764	421.49	55.31	YT
WK4_21	3167	2918	2653	424.2	54.89	YT
WK4_22	11432	10085	9813	447.89	55.06	YT
WK4_23	379	340	301	419.18	54.23	YT
WK4_24	3280	3005	2819	432.64	52.48	YT
WK4_25	252	224	218	440.49	56.04	YT
WK4_28	7835	6597	3964	443.31	63.42	YT
WK4_30	8378	7555	7546	450.75	56.68	YT
WK4_31	6581	6111	6105	451.51	52.31	YT
WK4_32	641	563	559	446.04	55.96	YT
WK1_15	6249	5770	3999	414.5	53.67	YZ
WK1_19	11729	10877	9289	419.95	53.67	YZ
WK1_30	4382	3932	3932	435.61	55.67	YZ
WK1_31	5067	4583	4143	428.26	54.68	YZ
WK1_32	4256	3974	3177	414.15	53.45	YZ
WK1_33	5555	5099	5066	413.88	54.22	YZ
WK1_34	4114	3833	2520	413.75	53.28	YZ
WK1_35	3384	3235	3226	418.2	54.56	YZ
WK1_36	2640	1501	1089	442.96	61.55	YZ
WK1_37	3730	3465	3459	437.63	53.83	YZ
WK1_38	7471	6659	4490	444.45	58.96	YZ
WK1_42	4800	4465	4428	451.28	52.39	YZ
WK1_43	5909	4865	3755	444.28	58.99	YZ
WK1_44	5281	4961	3820	423.4	54.04	YZ
WK1_45	4330	3908	3898	435.17	56.45	YZ
WK1_47	5953	5547	5491	418.96	54.94	YZ
WK1_48	3868	3640	3024	414.06	53.35	YZ
WK1_49	6270	5741	4916	421.93	53.64	YZ
WK1_50	5811	5433	4072	413.64	53.4	YZ
WK1_51	6072	5659	4528	414.68	53.48	YZ
WK1_52	2039	1918	1579	413.74	53.36	YZ
WK1_53	3554	3295	2848	415.98	53.78	YZ
WK1_54	5383	4805	4256	424.64	54.79	YZ
WK1_55	4682	4359	3159	417.8	54.19	YZ
WK1_56	6439	5832	5088	413.83	53.39	YZ
WK1_57	3552	3348	1874	414.24	53.66	YZ
WK1_58	7047	6421	6364	446.78	57.14	YZ
WK1_59	7715	7172	6759	414.45	53.66	YZ
WK1_60	4367	4074	2970	413.59	53.22	YZ
	3349911	2953434	2815736			--
