# Supplementary material for: Windborne migration amplifies insect-mediated pollination services
Source: eLife. 2022 Apr 13;11:e76230. doi: 10.7554/eLife.76230 (PMC9042232; doi:10.7554/eLife.76230)
Supplement: Supplementary file 3. [file elife-76230-supp3.xlsx]

## Sheet: Sheet3
OUT_ID	WK1_1	WK1_10	WK1_11	WK1_12	WK1_13	WK1_14	WK1_15	WK1_16	WK1_17	WK1_18	WK1_19	WK1_2	WK1_20	WK1_21	WK1_23	WK1_24	WK1_25	WK1_26	WK1_27	WK1_28	WK1_29	WK1_3	WK1_30	WK1_31	WK1_32	WK1_33	WK1_34	WK1_35	WK1_36	WK1_37	WK1_38	WK1_4	WK1_42	WK1_43	WK1_44	WK1_45	WK1_47	WK1_48	WK1_49	WK1_5	WK1_50	WK1_51	WK1_52	WK1_53	WK1_54	WK1_55	WK1_56	WK1_57	WK1_58
d__Eukaryota;p__Streptophyta;c__Magnoliopsida;o__Brassicales;f__Brassicaceae;g__Brassica;s__Brassicanapus	0	28	0	0	49	2	4753	0	52	0	7367	0	75	1	1	0	151	0	0	0	26	0	0	1165	3553	3316	3567	70	1	1	1	0	38	17	2309	2	577	3283	2759	0	4980	4977	1813	2867	3224	2562	5405	2173	487
d__Eukaryota;p__Streptophyta;c__Magnoliopsida;o__Rosales;f__Cannabaceae;g__Humulus;s__Humulusscandens	0	0	0	0	0	0	0	0	0	0	0	0	0	28	0	0	0	0	0	0	0	0	9	0	0	0	0	0	0	0	0	0	1	0	0	0	0	0	0	2	0	0	0	0	0	0	0	0	0
d__Eukaryota;p__Streptophyta;c__Magnoliopsida;o__Asterales;f__Asteraceae;g__Artemisia;s__Artemisiascoparia	0	1	0	0	0	0	0	0	0	0	0	0	0	0	0	0	0	0	0	0	0	0	0	0	0	0	0	0	0	0	0	0	0	0	0	0	0	0	0	0	0	0	0	0	0	0	0	0	4
d__Eukaryota;p__Streptophyta;c__Magnoliopsida;o__Asterales;f__Asteraceae;g__Chrysanthemum;s__Chrysanthemumlavandulifolium	0	0	0	0	0	0	0	0	0	0	0	0	0	0	0	0	0	0	0	0	0	0	0	0	0	0	0	0	0	0	0	0	0	0	0	0	0	0	0	0	0	0	0	0	0	0	0	0	0
d__Eukaryota;p__Streptophyta;c__Magnoliopsida;o__Poales;f__Poaceae;g__Festuca;s__Festucapratensis	0	0	0	0	0	0	0	0	0	0	0	2	0	0	0	0	0	0	0	0	0	0	0	0	0	0	0	0	0	0	0	0	0	0	0	0	0	0	0	0	0	0	0	0	0	0	0	0	0
d__Eukaryota;p__Streptophyta;c__Magnoliopsida;o__Apiales;f__Apiaceae;g__Sphallerocarpus;s__Sphallerocarpusgracilis	0	0	0	0	0	0	0	0	0	0	0	0	0	0	0	0	0	0	0	0	0	0	0	0	0	0	0	0	0	0	0	0	0	0	0	0	0	0	1	0	0	0	0	0	0	0	0	0	0
d__Eukaryota;p__Streptophyta;c__Magnoliopsida;o__Brassicales;f__Brassicaceae;g__Capsella;s__Capsellabursa-pastoris	0	0	0	0	0	0	45	0	0	0	0	0	0	0	0	0	0	0	0	0	0	0	0	2	65	0	0	2976	0	0	0	0	0	0	2	1189	3584	0	0	0	80	22	0	1	0	24	0	0	0
d__Eukaryota;p__Streptophyta;c__Magnoliopsida;o__Malvales;f__Malvaceae;g__Gossypium;s__Gossypiumhirsutum	0	754	0	0	24	1275	0	0	0	0	0	16	0	844	0	0	0	0	0	0	0	0	4	0	0	0	0	0	0	0	0	1	0	0	0	0	0	0	0	1	1	0	0	0	0	0	0	0	0
d__Eukaryota;p__Streptophyta;c__Magnoliopsida;o__Asterales;f__Asteraceae;g__Ixeridium;s__Ixeridiumdentatum	0	0	0	0	0	0	0	0	0	0	0	0	0	0	0	0	0	0	0	0	0	0	0	0	0	0	0	0	0	0	0	0	0	0	0	0	0	0	0	0	0	0	0	0	0	0	0	0	0
d__Eukaryota;p__Streptophyta;c__Magnoliopsida;o__Gentianales;f__Rubiaceae;g__Rubia;s__Rubiacordifolia	0	0	0	0	0	0	0	0	0	0	0	0	0	0	0	0	0	0	0	0	0	0	0	0	0	0	0	0	0	0	1	0	0	0	0	0	0	0	0	0	0	0	0	0	0	0	0	0	0
d__Eukaryota;p__Streptophyta;c__Magnoliopsida;o__Asterales;f__Asteraceae;g__Artemisia;s__Artemisiasp.AD-H	0	0	0	0	0	0	0	0	0	0	0	0	0	0	0	0	0	0	0	0	0	0	0	0	0	0	0	0	0	0	0	0	0	0	0	0	0	0	0	1	0	0	0	0	0	0	0	0	0
d__Eukaryota;p__Streptophyta;c__Magnoliopsida;o__Asterales;f__Asteraceae;g__Artemisia;s__Artemisiaannua	0	433	435	7	24	0	7	241	0	2833	0	0	0	19	0	0	0	0	0	0	0	0	175	0	0	0	0	4	0	0	1	0	1	4	9	0	17	0	0	0	0	8	0	6	0	0	0	0	3
d__Eukaryota;p__Streptophyta;c__Magnoliopsida;o__Asterales;f__Asteraceae;g__Iva;s__Ivaxanthiifolia	0	0	0	0	0	0	0	0	0	0	0	0	0	0	0	0	0	0	0	0	0	0	0	0	0	0	0	0	0	0	0	0	0	0	0	0	0	0	0	0	0	0	0	0	0	0	0	0	0
d__Eukaryota;p__Streptophyta;c__Magnoliopsida;o__Asterales;f__Asteraceae;g__Helianthus;s__Helianthusannuus	0	0	0	0	0	0	0	0	0	0	0	0	0	0	0	0	0	0	0	0	0	0	0	0	0	0	0	0	0	0	0	0	0	0	0	0	0	0	0	0	0	0	0	0	0	0	0	0	3
d__Eukaryota;p__Streptophyta;c__Magnoliopsida;o__Caryophyllales;f__Chenopodiaceae;g__Chenopodium;s__Chenopodiumgiganteum	0	1	0	433	4150	0	0	0	0	0	0	0	0	0	0	0	0	0	0	0	0	302	15	0	0	0	0	0	0	0	0	0	0	0	0	0	0	0	0	0	0	0	0	0	0	0	0	0	0
d__Eukaryota;p__Streptophyta;c__Magnoliopsida;o__Saxifragales;f__Crassulaceae;g__Sedum;s__Sedumjaponicum	0	0	0	1	0	0	0	0	99	0	0	0	0	0	0	0	107	0	0	0	0	0	0	0	0	0	0	0	0	0	0	0	0	0	0	0	0	0	0	0	0	0	0	0	0	0	0	0	0
d__Eukaryota;p__Streptophyta;c__Magnoliopsida;o__Caryophyllales;f__Caryophyllaceae;g__Stellaria;s__Stellariaalsine	0	42	26	0	0	3	1	38	55	0	0	0	0	0	0	0	7294	0	0	0	0	0	169	0	0	0	0	0	109	0	1661	0	4	1725	5	1796	121	45	0	5	0	0	0	6	0	0	0	0	0
d__Eukaryota;p__Streptophyta;c__Magnoliopsida;o__Asterales;f__Asteraceae;g__Eclipta;s__Ecliptaalba	0	0	0	0	0	0	0	0	0	0	0	0	0	24	0	0	0	0	0	0	0	0	0	0	0	0	0	0	0	0	0	0	0	0	0	0	4	0	0	1	0	0	0	0	0	0	0	0	0
d__Eukaryota;p__Streptophyta;c__Magnoliopsida;o__Rosales;f__Rosaceae;g__Potentilla;s__Potentillasupina	0	0	0	0	0	0	0	0	0	0	0	0	0	0	0	0	0	0	0	0	0	0	0	0	0	0	0	0	0	0	0	0	0	0	0	0	0	0	0	0	0	0	0	0	0	0	0	0	0
d__Eukaryota;p__Streptophyta;c__Magnoliopsida;o__Rosales;f__Cannabaceae;g__Cannabis;s__Cannabissativa	0	0	0	4285	0	0	9	45	0	0	0	0	0	0	0	0	0	0	0	0	0	0	161	0	0	0	0	9	0	0	0	0	0	2	5	1	28	0	0	3	0	8	0	1	0	0	0	0	2
d__Eukaryota;p__Streptophyta;c__Magnoliopsida;o__Asterales;f__Asteraceae;g__Artemisia;s__Artemisiavulgaris	0	11	13	0	0	0	1	0	0	1080	0	0	0	0	0	0	0	0	0	0	0	0	0	0	0	0	0	0	0	0	0	0	0	0	0	0	0	0	0	0	0	1	0	0	0	0	0	0	0
d__Eukaryota;p__Streptophyta;c__Magnoliopsida;o__Caryophyllales;f__Amaranthaceae;g__Amaranthus;s__Amaranthushybridus	0	0	0	6	0	0	0	0	0	0	0	0	0	0	0	0	0	0	0	0	0	0	0	0	0	0	0	0	0	0	0	0	0	0	0	0	0	0	0	0	0	0	0	0	0	0	0	0	0
d__Eukaryota;p__Streptophyta;c__Magnoliopsida;o__Celastrales;f__Celastraceae;g__Celastrus;s__Celastrusorbiculatus	0	0	0	0	0	0	0	0	0	0	0	0	0	0	0	0	0	0	0	0	0	0	0	0	0	0	0	0	0	0	0	0	0	0	0	0	0	0	0	0	0	0	0	0	0	0	0	0	0
d__Eukaryota;p__Streptophyta;c__Magnoliopsida;o__Solanales;f__Solanaceae;g__Capsicum;s__Capsicumannuum	0	0	0	0	0	0	0	0	0	0	0	0	1	0	0	0	0	0	0	0	0	0	0	0	0	0	0	0	0	0	0	0	0	0	0	0	0	0	0	0	0	0	0	0	0	0	0	0	0
d__Eukaryota;p__Streptophyta;c__Magnoliopsida;o__Brassicales;f__Brassicaceae;g__Brassica;s__Brassicacarinata	26	0	1	1	0	0	551	0	0	1	0	0	0	0	0	0	12	0	0	0	5	0	2	0	0	1302	5	39	1	0	0	16	16	9	4	2	27	0	0	81	0	10	0	10	0	1	0	7	47
d__Eukaryota;p__Streptophyta;c__Magnoliopsida;o__Apiales;f__Apiaceae;g__Cnidium;s__Cnidiummonnieri	0	579	187	31	594	27	3	855	279	234	0	3	653	78	0	3314	559	336	3217	0	0	0	84	0	0	0	0	0	0	0	0	0	0	3	0	0	5	0	0	24	0	0	0	0	0	0	0	0	9
d__Eukaryota;p__Streptophyta;c__Magnoliopsida;o__Solanales;f__Solanaceae;g__Solanum;s__Solanumamericanum	0	0	0	0	0	0	0	0	0	0	0	0	0	0	0	0	0	0	0	0	0	0	0	0	0	0	0	0	0	0	0	0	0	0	0	0	0	0	0	0	0	0	0	0	0	0	0	0	0
d__Eukaryota;p__Streptophyta;c__Magnoliopsida;o__Malpighiales;f__Phyllanthaceae;g__Flueggea;s__Flueggeasuffruticosa	0	0	0	0	0	0	0	0	0	0	0	0	0	0	0	0	0	0	0	0	0	0	0	0	0	0	0	0	0	0	0	0	0	0	0	0	0	0	0	0	0	0	0	0	0	0	0	0	0
d__Eukaryota;p__Streptophyta;c__Magnoliopsida;o__Caryophyllales;f__Chenopodiaceae;g__Salsola;s__Salsolacollina	0	0	0	0	0	0	0	0	0	0	0	0	0	0	0	0	0	0	0	0	0	0	0	0	0	0	0	0	0	0	0	0	0	1	0	0	0	0	0	0	0	0	0	0	0	0	0	0	0
d__Eukaryota;p__Streptophyta;c__Pinopsida;o__Pinales;f__Pinaceae;g__Pinus;s__Pinustaiwanensis	0	0	0	0	61	0	0	0	0	0	0	0	0	0	0	0	0	0	0	3	0	0	0	0	0	0	0	0	0	0	0	0	0	17	0	0	0	0	0	0	0	0	0	0	0	0	0	0	28
d__Eukaryota;p__Streptophyta;c__Magnoliopsida;o__Asterales;f__Asteraceae;g__Cosmos;s__Cosmosbipinnatus	0	0	0	0	0	0	0	0	0	0	0	0	0	0	0	0	0	0	0	0	0	0	0	0	0	0	0	0	0	0	0	0	0	0	0	0	0	0	0	0	0	0	0	0	0	0	0	0	0
d__Eukaryota;p__Streptophyta;c__Magnoliopsida;o__Brassicales;f__Brassicaceae;g__Descurainia;s__Descurainiasophia	0	0	0	0	0	0	0	0	0	0	0	0	0	0	0	0	0	0	0	0	0	0	0	0	0	0	0	0	0	0	0	0	0	0	0	0	0	0	0	0	0	0	0	0	0	0	0	0	0
d__Eukaryota;p__Streptophyta;c__Magnoliopsida;o__Rosales;f__Rosaceae;g__Potentilla;s__Potentillaanadyrensis	0	0	0	0	0	0	0	0	0	0	0	0	0	0	0	0	0	0	0	0	0	0	0	0	0	0	0	0	0	0	0	0	1	0	0	0	0	0	0	0	0	0	0	0	0	0	0	0	0
d__Eukaryota;p__Streptophyta;c__Magnoliopsida;o__Rosales;f__Moraceae;g__Maclura;s__Macluratricuspidata	0	0	0	0	0	0	0	0	0	0	0	0	0	0	3	0	0	0	0	0	0	0	0	0	0	0	0	0	0	0	0	0	0	0	0	0	0	0	0	0	0	0	0	0	0	0	0	0	0
d__Eukaryota;p__Streptophyta;c__Magnoliopsida;o__Ranunculales;f__Ranunculaceae;g__Ranunculus;s__Ranunculusbulbosus	0	281	141	27	163	105	3	208	117	108	0	3	584	0	14	0	0	1306	0	0	0	0	0	0	0	1	0	1	0	2314	0	1	1	0	2091	1	2	0	2532	27	0	1	0	0	2	0	1	0	7
d__Eukaryota;p__Streptophyta;c__Magnoliopsida;o__Asterales;f__Asteraceae;g__Sonchus;s__Sonchusoleraceus	0	0	33	5	0	0	3	0	0	24	0	0	8	35	0	0	0	0	0	0	0	0	13	1	0	0	0	0	0	839	0	0	4205	0	0	0	0	0	0	5	0	0	0	0	0	0	0	0	8
d__Eukaryota;p__Streptophyta;c__Magnoliopsida;o__Asterales;f__Asteraceae;g__Ageratum;s__Ageratumconyzoides	0	0	0	0	0	0	0	0	0	0	0	0	0	0	0	0	0	0	0	0	0	0	0	0	0	0	0	0	0	0	0	0	0	0	0	0	0	0	0	1	0	0	0	0	0	0	0	0	0
d__Eukaryota;p__Streptophyta;c__Magnoliopsida;o__Lamiales;f__Plantaginaceae;g__Veronica;s__Veronicapersica	0	0	0	1	0	0	0	0	0	0	1311	0	0	0	0	0	0	0	0	0	0	0	0	0	0	0	0	0	0	0	0	0	43	141	0	0	18	0	0	0	0	6	0	0	0	529	0	46	8
d__Eukaryota;p__Streptophyta;c__Magnoliopsida;o__Ranunculales;f__Ranunculaceae;g__Thalictrum;s__Thalictrumpetaloideum	0	0	0	0	0	0	0	0	0	0	0	0	0	0	0	0	0	0	0	0	0	0	0	0	0	0	0	0	0	0	0	0	0	0	0	0	0	0	0	0	0	0	0	0	0	0	0	0	0
d__Eukaryota;p__Streptophyta;c__Magnoliopsida;o__Apiales;f__Apiaceae;g__Coriandrum;s__Coriandrumsativum	0	0	0	0	0	0	0	0	0	0	0	0	0	0	0	1	0	0	0	0	0	0	0	0	0	0	0	0	0	0	0	0	0	0	0	0	0	0	0	0	0	0	0	0	0	0	0	0	0
d__Eukaryota;p__Streptophyta;c__Magnoliopsida;o__Caryophyllales;f__Amaranthaceae;g__Amaranthus;s__Amaranthustuberculatus	0	0	0	449	0	0	0	0	0	1897	4	0	0	1	0	0	0	0	0	0	0	0	0	0	0	0	0	0	0	0	0	0	0	0	0	0	0	0	0	0	0	0	0	0	0	0	0	0	0
d__Eukaryota;p__Streptophyta;c__Magnoliopsida;o__Caryophyllales;f__Amaranthaceae;g__Amaranthus;s__Amaranthusviridis	0	0	0	0	0	0	0	0	0	0	0	0	0	0	0	0	0	0	0	0	0	0	0	0	0	0	0	0	0	0	0	0	0	0	0	0	0	0	0	0	0	0	0	0	0	0	0	0	0
d__Eukaryota;p__Streptophyta;c__Magnoliopsida;o__Ericales;f__Primulaceae;g__Embelia;s__Embeliavestita	0	0	0	0	0	0	0	0	0	0	0	0	0	0	0	0	0	0	0	0	0	1	0	0	0	0	0	0	0	0	0	0	0	0	0	0	0	0	0	0	0	0	0	0	0	0	0	0	0
d__Eukaryota;p__Streptophyta;c__Magnoliopsida;o__Asterales;f__Asteraceae;g__Crepidiastrum;s__Crepidiastrumsp.YJJ-2021	0	0	0	0	0	0	0	0	0	0	0	0	0	0	0	0	0	0	0	0	0	0	0	0	0	0	0	0	0	0	0	0	0	0	0	0	0	0	0	0	0	0	0	0	0	0	0	0	0
d__Eukaryota;p__Streptophyta;c__Magnoliopsida;o__Caryophyllales;f__Chenopodiaceae;g__Beta;s__Betavulgaris	0	0	0	0	0	0	0	0	0	0	0	0	0	0	0	0	0	0	0	0	0	0	0	0	0	0	0	0	0	0	0	0	0	0	0	0	0	0	0	0	0	0	0	0	0	0	0	0	0
d__Eukaryota;p__Streptophyta;c__Magnoliopsida;o__Lamiales;f__Oleaceae;g__Osmanthus;s__Osmanthusfragrans	0	0	0	0	0	0	0	0	0	0	0	0	0	0	0	0	0	0	0	0	0	0	0	0	0	0	0	0	0	0	0	0	0	0	0	0	0	0	0	0	0	0	0	0	0	0	0	0	0
d__Eukaryota;p__Streptophyta;c__Magnoliopsida;o__Asterales;f__Asteraceae;g__Artemisia;s__Artemisiasp.Rst2	0	2	0	0	0	0	0	0	0	16	0	0	0	0	0	0	0	0	0	0	0	0	0	0	0	0	0	0	0	0	0	0	0	0	0	0	0	0	0	0	0	0	0	0	0	0	0	0	0
d__Eukaryota;p__Streptophyta;c__Magnoliopsida;o__Malpighiales;f__Euphorbiaceae;g__Euphorbia;s__Euphorbiahelioscopia	0	0	0	0	0	0	0	0	0	0	0	0	0	0	0	0	0	0	0	0	0	0	0	0	0	0	0	0	0	51	0	0	0	0	0	292	298	0	45	0	0	136	0	225	0	0	0	0	0
d__Eukaryota;p__Streptophyta;c__Magnoliopsida;o__Brassicales;f__Brassicaceae;g__Raphanus;s__Raphanussativus	0	0	0	0	0	0	0	0	0	0	2	0	0	0	0	0	0	0	0	0	0	0	0	0	0	0	0	0	0	0	0	0	0	0	2	2	597	0	0	0	0	2	0	4	0	0	0	0	0
d__Eukaryota;p__Streptophyta;c__Magnoliopsida;o__Solanales;f__Convolvulaceae;g__Calystegia;s__Calystegiasepium	0	0	0	0	0	0	0	0	0	0	0	0	0	0	0	0	0	0	0	0	0	0	0	0	0	0	0	0	0	0	0	0	0	0	0	63	0	0	0	0	0	0	0	0	0	0	0	0	0
d__Eukaryota;p__Streptophyta;c__Magnoliopsida;o__Rosales;f__Urticaceae;g__Boehmeria;s__Boehmerianivea	0	0	0	0	0	0	0	0	0	0	0	0	0	0	0	0	0	0	0	0	0	0	0	0	0	0	0	0	0	0	0	0	0	0	0	0	0	0	0	0	0	0	0	0	0	0	0	0	0
d__Eukaryota;p__Streptophyta;c__Magnoliopsida;o__Fabales;f__Fabaceae;g__Phanera;s__Phaneravariegata	0	0	0	3	0	0	0	0	0	0	0	0	0	0	1	0	0	0	0	0	0	0	0	0	0	0	0	0	0	0	0	0	0	0	0	0	0	0	0	0	0	0	0	0	0	0	0	0	0
d__Eukaryota;p__Streptophyta;c__Magnoliopsida;o__Poales;f__Poaceae;g__Triticum;s__Triticumturgidum	0	0	0	0	31	0	0	0	0	0	0	0	0	0	0	0	0	0	0	0	0	0	0	0	0	0	0	0	441	0	2469	0	1	1346	173	0	0	0	0	0	0	0	0	0	0	0	0	0	0
d__Eukaryota;p__Streptophyta;c__Magnoliopsida;o__Caryophyllales;f__Polygonaceae;g__Koenigia;s__Koenigiadivaricata	0	0	0	0	0	0	0	0	0	0	0	0	0	0	0	0	0	0	0	0	0	0	0	1	0	0	0	0	0	0	0	0	0	0	0	0	0	0	0	0	0	0	0	0	0	0	0	0	0
d__Eukaryota;p__Streptophyta;c__Magnoliopsida;o__Lamiales;f__Lamiaceae;g__Leonurus;s__Leonuruschaituroides	0	0	0	0	0	0	0	0	0	0	0	0	0	0	0	0	0	0	0	0	0	0	0	0	0	0	0	0	0	0	0	0	0	0	0	0	0	0	0	0	0	0	0	0	0	0	0	0	0
d__Eukaryota;p__Streptophyta;c__Magnoliopsida;o__Poales;f__Poaceae;g__Triticum;s__Triticumaestivum	0	0	0	0	0	0	0	0	0	0	0	0	0	0	0	0	0	0	0	0	0	0	0	0	0	0	0	0	335	0	1798	0	1	914	106	2	0	0	0	0	0	0	0	0	0	0	0	0	0
d__Eukaryota;p__Streptophyta;c__Magnoliopsida;o__Caryophyllales;f__Amaranthaceae;g__Amaranthus;s__Amaranthusblitum	0	0	0	0	0	0	0	0	0	0	0	0	0	0	0	0	0	0	0	0	0	0	0	0	0	0	0	0	0	0	0	0	0	0	0	0	0	0	0	0	0	0	0	0	0	0	0	0	0
d__Eukaryota;p__Streptophyta;c__Magnoliopsida;o__Dipsacales;f__Adoxaceae;g__Sambucus;s__Sambucusadnata	0	0	0	0	0	0	0	0	0	0	0	0	0	0	0	0	0	0	0	0	0	0	0	0	0	0	0	0	0	0	0	0	0	0	0	0	0	0	0	0	0	0	0	0	0	0	0	0	0
d__Eukaryota;p__Streptophyta;c__Magnoliopsida;o__Fabales;f__Fabaceae;g__Lotus;s__Lotuscorniculatus	0	0	0	0	0	0	0	0	0	0	0	0	0	0	0	0	0	0	0	0	0	0	0	0	0	0	0	0	0	0	0	0	0	0	0	0	0	0	0	0	0	0	0	0	0	0	0	0	0
d__Eukaryota;p__Streptophyta;c__Magnoliopsida;o__Lamiales;f__Plantaginaceae;g__Veronica;s__Veronicaanagalloides	0	0	0	0	0	0	0	0	0	0	0	0	0	0	0	0	0	0	0	0	0	0	0	0	0	0	0	0	0	0	0	0	0	0	0	0	0	0	0	0	0	0	0	0	0	0	0	0	0
d__Eukaryota;p__Streptophyta;c__Magnoliopsida;o__Asterales;f__Asteraceae;g__Inula;s__Inulajaponica	1	0	0	0	0	0	0	0	0	0	0	0	0	0	0	0	0	0	0	0	0	0	0	0	0	0	0	0	0	0	0	0	0	0	0	0	0	0	0	0	0	0	0	0	0	0	0	0	0
d__Eukaryota;p__Streptophyta;c__Magnoliopsida;o__Caryophyllales;f__Polygonaceae;g__Fagopyrum;s__Fagopyrumesculentum	0	0	0	0	0	0	0	0	0	0	0	0	0	0	0	0	0	0	0	0	0	0	0	0	0	0	0	0	0	0	0	0	0	0	0	0	0	0	0	0	0	0	0	0	0	0	0	0	0
d__Eukaryota;p__Streptophyta;c__Magnoliopsida;o__Apiales;f__Apiaceae;g__Apium;s__Apiumgraveolens	0	0	0	0	0	0	0	0	0	0	0	0	0	0	0	0	0	0	91	0	1	0	0	0	0	0	0	0	0	0	0	0	0	0	0	0	0	0	0	0	0	0	0	0	0	0	0	0	0
d__Eukaryota;p__Streptophyta;c__Magnoliopsida;o__Caryophyllales;f__Chenopodiaceae;g__Bassia;s__Bassiascoparia	0	154	37	0	0	3	0	0	29	0	0	0	0	0	0	0	0	0	0	0	0	0	0	0	0	0	0	1	0	0	0	0	0	0	0	0	1	0	0	0	0	0	0	0	0	0	0	0	0
d__Eukaryota;p__Streptophyta;c__Magnoliopsida;o__Fabales;f__Fabaceae;g__Amorpha;s__Amorphaglabra	0	0	0	0	0	0	0	0	0	0	0	0	0	0	0	0	0	0	0	0	0	0	0	0	0	0	0	0	0	0	0	0	0	0	0	0	0	0	0	0	0	0	0	0	0	0	0	0	0
d__Eukaryota;p__Streptophyta;c__Magnoliopsida;o__Rosales;f__Moraceae;g__Morus;s__Morusalba	0	0	0	0	0	0	1	0	0	0	0	0	0	0	0	0	0	0	0	0	0	0	0	0	0	0	0	0	0	0	0	0	0	0	0	0	0	0	0	0	0	0	0	0	0	0	0	0	0
d__Eukaryota;p__Streptophyta;c__Magnoliopsida;o__Asterales;f__Asteraceae;g__Ambrosia;s__Ambrosiatrifida	0	0	0	0	0	0	0	0	0	0	0	0	0	0	0	0	0	0	0	0	0	0	0	0	0	0	0	0	0	0	0	0	0	0	0	0	0	0	0	0	0	0	0	0	0	0	0	0	0
d__Eukaryota;p__Streptophyta;c__Magnoliopsida;o__Asterales;f__Asteraceae;g__Cirsium;s__Cirsiumarvense	0	0	0	0	0	0	0	0	0	0	0	0	0	0	0	0	0	0	0	0	0	0	0	0	0	0	0	0	0	0	0	0	0	0	0	0	0	0	0	0	0	0	0	0	0	0	0	0	0
d__Eukaryota;p__Streptophyta;c__Magnoliopsida;o__Lamiales;f__Verbenaceae;g__Glandularia;s__Glandulariasubincana	0	0	0	12	119	4	0	108	172	164	0	0	648	108	1810	594	317	2	1391	2344	2220	0	20	0	0	0	0	0	0	0	0	0	0	0	1	0	5	0	0	0	0	0	0	0	0	0	0	0	0
d__Eukaryota;p__Streptophyta;c__Magnoliopsida;o__Asterales;f__Asteraceae;g__Ambrosia;s__Ambrosiaperuviana	0	0	0	0	0	0	0	0	0	0	0	0	0	0	0	0	0	0	0	0	0	0	0	0	0	0	0	0	0	0	0	0	0	0	0	0	0	0	0	0	0	0	0	0	0	0	0	0	0
d__Eukaryota;p__Streptophyta;c__Magnoliopsida;o__Asterales;f__Asteraceae;g__Carduus;s__Carduuscrispus	0	0	0	0	0	0	0	0	0	0	0	0	0	0	0	0	0	0	0	0	0	0	0	0	0	0	0	0	0	0	0	0	0	0	0	0	0	0	0	0	0	0	0	0	0	0	0	0	5287
d__Eukaryota;p__Streptophyta;c__Magnoliopsida;o__Poales;f__Poaceae;g__Lolium;s__Loliumperenne	0	0	0	0	0	0	0	0	0	0	0	0	0	0	0	0	0	0	0	0	0	0	0	0	0	0	0	0	0	0	0	0	0	0	0	0	0	0	0	0	0	0	0	0	0	0	0	0	0
d__Eukaryota;p__Streptophyta;c__Magnoliopsida;o__Caryophyllales;f__Chenopodiaceae;g__Chenopodium;s__Chenopodiumsp.CP74	0	0	0	0	1	0	0	0	0	0	0	0	0	0	0	0	0	0	0	0	0	1	0	0	0	0	0	0	0	223	0	0	0	0	1	0	0	0	0	0	0	0	0	0	1298	0	0	0	0
d__Eukaryota;p__Streptophyta;c__Magnoliopsida;o__Lamiales;f__Lamiaceae;g__Elsholtzia;s__Elsholtziaciliata	0	0	0	0	0	0	0	0	0	0	0	0	0	0	0	0	0	0	0	0	0	0	0	0	0	0	0	0	0	0	0	0	0	0	0	0	0	0	0	0	0	0	0	0	0	0	0	0	0
d__Eukaryota;p__Streptophyta;c__Magnoliopsida;o__Brassicales;f__Brassicaceae;g__Brassica;s__Brassicarapa	0	2	0	0	2	0	113	0	1	0	211	0	2	0	0	0	0	0	0	0	1	0	0	46	94	114	95	4	0	0	0	0	0	0	51	0	14	86	93	0	139	204	54	88	89	57	158	47	18
d__Eukaryota;p__Streptophyta;c__Magnoliopsida;o__Asterales;f__Asteraceae;g__Aster;s__Asterhispidus	0	2	0	0	0	0	0	0	0	0	0	0	0	0	0	0	0	0	0	0	0	0	0	0	0	0	0	0	0	0	0	0	0	0	0	0	0	0	0	0	0	0	0	0	0	0	0	0	0
d__Eukaryota;p__Streptophyta;c__Magnoliopsida;o__Sapindales;f__Sapindaceae;g__Dimocarpus;s__Dimocarpuslongan	0	0	0	0	0	0	0	0	0	0	0	0	0	0	0	0	0	0	0	0	0	0	0	0	0	0	0	0	0	0	0	0	0	0	0	0	0	0	0	0	0	0	0	0	0	0	0	0	0
d__Eukaryota;p__Streptophyta;c__Magnoliopsida;o__Solanales;f__Solanaceae;g__Nicotiana;s__Nicotianatabacum	0	0	0	0	0	0	0	91	0	0	0	0	0	0	0	0	0	0	0	0	0	0	0	0	0	0	0	0	0	0	0	0	0	0	0	0	0	0	0	0	0	0	0	0	0	0	0	0	1
d__Eukaryota;p__Streptophyta;c__Magnoliopsida;o__Rosales;f__Rhamnaceae;g__Ziziphus;s__Ziziphusjujuba	0	0	0	0	0	0	0	0	0	0	0	0	0	0	0	0	0	0	0	0	0	0	0	0	0	0	0	0	0	0	0	0	0	0	0	0	0	0	0	0	0	0	0	0	0	0	0	0	0
d__Eukaryota;p__Streptophyta;c__Magnoliopsida;o__Caryophyllales;f__Polygonaceae;g__Persicaria;s__Persicariasenticosa	0	0	0	0	0	0	0	0	0	0	0	0	0	0	0	0	0	0	0	0	0	0	0	0	0	0	0	0	0	0	0	0	0	0	0	0	0	0	0	0	0	0	0	0	0	0	0	0	0
d__Eukaryota;p__Streptophyta;c__Magnoliopsida;o__Brassicales;f__Brassicaceae;g__Sisymbrium;s__Sisymbriumirio	1264	80	38	5	0	0	1	0	0	43	0	4	0	0	0	0	0	0	0	0	0	0	74	0	0	0	0	0	1	0	0	1025	0	0	0	1	2	0	0	4078	0	7	0	0	0	0	0	0	0
d__Eukaryota;p__Streptophyta;c__Magnoliopsida;o__Poales;f__Poaceae;g__Zea;s__Zeamays	0	4	0	0	14	0	0	0	12	21	0	0	0	0	0	0	0	0	0	0	0	0	0	0	0	0	0	0	0	0	0	0	0	0	0	0	1	0	0	0	0	0	0	0	0	0	0	0	0
d__Eukaryota;p__Streptophyta;c__Magnoliopsida;o__Asterales;f__Asteraceae;g__Lactuca;s__Lactucaindica	0	0	0	0	0	0	0	0	0	0	0	0	0	0	0	0	0	0	0	0	0	0	0	0	0	0	0	0	0	0	0	0	0	0	0	0	0	0	0	0	0	0	0	0	0	0	0	0	0
d__Eukaryota;p__Streptophyta;c__Magnoliopsida;o__Caryophyllales;f__Chenopodiaceae;g__Chenopodium;s__Chenopodiumacuminatum	0	0	0	0	0	0	0	0	0	0	0	0	0	0	0	0	0	0	0	0	0	0	0	0	0	0	0	0	0	0	0	0	0	0	0	0	0	0	0	0	0	0	0	0	0	0	0	0	0
d__Eukaryota;p__Streptophyta;c__Magnoliopsida;o__Solanales;f__Convolvulaceae;g__Convolvulus;s__Convolvulusarvensis	0	0	0	0	23	0	0	0	0	0	0	1357	0	0	0	0	0	0	0	0	0	4590	20	0	0	0	0	0	0	0	0	0	0	0	2	0	0	0	0	0	0	1	0	0	0	0	0	0	0
d__Eukaryota;p__Streptophyta;c__Magnoliopsida;o__Brassicales;f__Brassicaceae;g__Brassica;s__Brassicaoleracea	0	0	0	0	0	0	0	0	0	0	0	0	0	0	0	0	46	0	0	0	0	0	0	0	0	0	0	0	0	0	0	0	0	0	0	0	0	0	0	0	1	0	0	0	1	739	1	979	20
d__Eukaryota;p__Streptophyta;c__Magnoliopsida;o__Ranunculales;f__Ranunculaceae;g__Ranunculus;s__Ranunculussceleratus	0	0	0	0	0	0	0	0	0	0	0	0	0	0	0	0	0	0	0	0	0	0	2797	3035	72	0	0	0	0	0	0	0	0	0	0	435	0	0	0	0	0	0	0	0	0	196	0	0	0
d__Eukaryota;p__Streptophyta;c__Magnoliopsida;o__Asterales;f__Asteraceae;g__Bidens;s__Bidensalba	0	0	0	0	0	0	0	0	0	0	0	0	0	0	0	0	0	0	0	0	0	0	0	0	0	0	0	0	0	0	0	0	0	0	0	0	0	0	0	0	0	0	0	0	0	0	0	0	0
d__Eukaryota;p__Streptophyta;c__Magnoliopsida;o__Asterales;f__Asteraceae;g__Artemisia;s__Artemisiasp.MP572	0	0	0	0	0	0	0	0	0	0	0	0	0	0	0	0	0	0	0	0	0	0	0	0	0	0	0	0	0	0	0	0	0	0	0	0	0	0	0	0	0	0	0	0	0	0	0	0	0
d__Eukaryota;p__Streptophyta;c__Magnoliopsida;o__Solanales;f__Solanaceae;g__Solanum;s__Solanumvillosum	0	0	0	0	0	0	0	0	0	0	0	0	0	0	0	0	0	0	0	0	0	0	0	0	0	0	0	0	0	0	0	0	0	0	0	0	0	0	0	0	0	0	0	0	0	0	0	0	0
d__Eukaryota;p__Streptophyta;c__Magnoliopsida;o__Sapindales;f__Meliaceae;g__Heynea;s__Heyneatrijuga	0	0	0	0	0	0	0	0	0	0	0	0	0	0	0	0	0	0	0	0	0	0	0	0	0	0	0	0	0	0	0	0	0	0	0	0	0	0	0	0	0	0	0	0	0	0	0	0	0
d__Eukaryota;p__Streptophyta;c__Magnoliopsida;o__Rosales;f__Rosaceae;g__Rosa;s__Rosaarkansana	0	0	0	0	0	0	0	0	0	0	0	0	0	0	0	0	26	0	0	0	0	0	0	0	0	0	0	0	0	0	0	0	0	0	0	0	0	0	0	0	0	0	0	0	0	0	0	0	0
d__Eukaryota;p__Streptophyta;c__Magnoliopsida;o__Sapindales;f__Rutaceae;g__Zanthoxylum;s__Zanthoxylumschinifolium	0	0	0	0	0	0	0	0	0	0	0	0	1	0	0	0	0	0	0	0	0	0	0	0	0	0	0	0	0	0	0	0	0	0	0	0	2	0	0	0	0	0	0	0	0	0	0	0	0
d__Eukaryota;p__Streptophyta;c__Magnoliopsida;o__Ranunculales;f__Papaveraceae;g__Chelidonium;s__Chelidoniummajus	0	0	0	0	0	0	0	0	0	0	0	0	0	0	0	0	0	0	0	0	0	0	0	0	0	0	0	0	0	0	0	0	0	0	0	0	0	0	0	0	0	0	0	0	0	0	0	0	0
d__Eukaryota;p__Streptophyta;c__Magnoliopsida;o__Lamiales;f__Mazaceae;g__Mazus;s__Mazuspumilus	0	0	0	0	0	0	0	0	0	0	0	0	0	0	0	0	0	0	0	0	0	0	0	0	0	0	0	0	0	0	0	0	0	0	0	0	0	0	0	0	0	0	0	0	0	0	0	0	0
d__Eukaryota;p__Streptophyta;c__Magnoliopsida;o__Asterales;f__Asteraceae;g__Xanthium;s__Xanthiumstrumarium	0	0	0	0	0	0	0	0	0	0	0	0	0	0	0	0	0	0	0	0	0	0	0	0	0	0	0	0	0	0	0	0	0	0	0	0	0	0	0	0	0	0	0	0	0	0	0	0	0
d__Eukaryota;p__Streptophyta;c__Magnoliopsida;o__Caryophyllales;f__Polygonaceae;g__Persicaria;s__Persicariaorientalis	0	0	0	0	0	0	0	0	0	0	0	0	0	0	0	0	0	0	0	0	0	0	0	0	0	0	0	0	0	0	0	0	0	0	0	0	0	0	0	0	0	0	0	0	0	0	0	0	0
d__Eukaryota;p__Streptophyta;c__Magnoliopsida;o__Ranunculales;f__Ranunculaceae;g__Thalictrum;s__Thalictrumtrichopus	0	342	246	19	272	62	0	0	392	187	0	7	215	69	0	0	0	1694	0	178	0	1	23	1	0	0	0	0	0	0	0	0	2	0	2	0	4	0	0	27	0	4	0	0	0	0	0	0	0
d__Eukaryota;p__Streptophyta;c__Magnoliopsida;o__Brassicales;f__Brassicaceae;g__Sisymbrium;s__Sisymbriumorientale	1245	11	1	0	45	7	2	0	65	2	0	2	0	0	0	0	0	0	0	0	0	0	69	0	0	0	0	5	2	0	0	1259	2	0	12	0	4	0	0	1964	0	4	0	1	0	0	0	0	0
d__Eukaryota;p__Streptophyta;c__Magnoliopsida;o__Rosales;f__Rosaceae;g__Fragaria;s__Fragariasp.CFRA538	0	0	0	0	0	0	0	0	0	0	0	0	0	0	0	0	0	0	0	0	0	0	0	0	0	0	0	0	0	0	0	0	0	0	0	0	0	0	0	0	0	0	0	0	0	0	0	0	0
d__Eukaryota;p__Streptophyta;c__Magnoliopsida;o__Solanales;f__Solanaceae;g__Lycium;s__Lyciumhybridcultivar	0	0	0	0	0	0	0	0	0	0	0	0	0	0	0	0	0	0	0	0	0	0	0	0	0	0	0	0	0	0	0	0	0	0	0	0	0	0	0	0	0	0	0	0	0	0	0	0	0
d__Eukaryota;p__Streptophyta;c__Magnoliopsida;o__Caryophyllales;f__Chenopodiaceae;g__Suaeda;s__Suaedataxifolia	0	2033	0	0	0	0	0	415	0	0	0	2699	0	0	0	0	0	0	0	0	0	0	0	0	0	0	0	0	0	0	0	0	0	0	0	0	0	0	0	0	0	0	0	0	0	0	0	0	0
d__Eukaryota;p__Streptophyta;c__Magnoliopsida;o__Fabales;f__Fabaceae;g__Lespedeza;s__Lespedezapotaninii	0	0	0	0	0	0	0	0	0	0	0	0	0	0	0	0	0	0	0	0	0	0	0	0	0	0	0	0	0	0	0	0	0	0	0	0	0	0	0	0	0	0	0	0	0	0	0	0	0
d__Eukaryota;p__Streptophyta;c__Magnoliopsida;o__Rosales;f__Rosaceae;g__Potentilla;s__Potentillamultifida	0	0	0	0	0	0	0	0	0	0	0	0	0	0	0	0	0	0	0	0	0	0	0	0	0	0	0	0	0	0	0	0	0	0	0	0	0	0	0	0	0	0	0	0	0	0	0	0	0
d__Eukaryota;p__Streptophyta;c__Magnoliopsida;o__Asterales;f__Asteraceae;g__Artemisia;s__Artemisiakotuchovii	0	0	0	0	0	0	0	0	0	0	0	0	0	0	0	0	0	0	0	0	0	0	0	0	0	0	0	0	0	0	0	0	0	0	0	0	0	0	0	0	0	0	0	0	0	0	0	0	0
d__Eukaryota;p__Streptophyta;c__Magnoliopsida;o__Rosales;f__Rosaceae;g__Fragaria;s__Fragariavirginiana	0	0	0	0	0	0	0	0	0	0	0	0	0	0	0	0	0	0	0	0	0	0	0	0	0	0	0	0	0	0	0	0	0	0	0	0	0	0	0	0	0	0	0	0	0	0	0	0	0
d__Eukaryota;p__Streptophyta;c__Magnoliopsida;o__Asterales;f__Asteraceae;g__Bidens;s__Bidenspilosa	0	0	0	0	0	0	0	0	0	0	0	0	0	0	0	0	0	0	0	0	0	0	0	0	0	0	0	0	0	0	0	0	0	0	0	0	0	0	0	0	0	0	0	0	0	0	0	0	0
d__Eukaryota;p__Streptophyta;c__Magnoliopsida;o__Asterales;f__Asteraceae;g__Galinsoga;s__Galinsogaquadriradiata	0	0	0	0	0	0	0	0	0	0	0	0	0	0	0	0	0	0	0	0	0	0	0	0	0	0	0	0	0	0	0	0	0	0	0	0	0	0	0	0	0	0	0	0	0	0	0	0	0
d__Eukaryota;p__Streptophyta;c__Magnoliopsida;o__Rosales;f__Rosaceae;g__Sorbus;s__Sorbusvilmorinii	0	0	0	0	0	0	0	0	0	0	0	0	0	0	0	0	0	0	0	0	0	0	0	0	0	0	0	0	0	0	0	0	0	0	0	0	0	0	0	0	0	0	0	0	0	0	0	0	0
d__Eukaryota;p__Streptophyta;c__Magnoliopsida;o__Asterales;f__Asteraceae;g__Youngia;s__Youngiajaponica	0	58	54	4	0	3	0	195	87	28	1	0	75	35	805	122	0	599	0	0	0	0	0	0	0	0	0	0	0	0	0	0	6	0	0	0	4	0	0	1	0	0	0	0	0	0	0	0	5
d__Eukaryota;p__Streptophyta;c__Magnoliopsida;o__Asterales;f__Asteraceae;g__Artemisia;s__Artemisiajaponica	0	0	0	0	0	0	0	0	0	0	0	0	0	0	0	0	0	0	0	0	0	0	0	0	0	0	0	0	0	0	0	0	0	0	0	0	0	0	0	0	0	0	0	0	0	0	0	0	0
d__Eukaryota;p__Streptophyta;c__Magnoliopsida;o__Asterales;f__Asteraceae;g__Coreopsis;s__Coreopsislanceolata	0	0	0	0	0	0	0	0	0	0	0	0	0	0	0	0	0	0	0	0	0	0	0	0	0	0	0	0	0	0	0	0	0	0	0	0	0	0	0	0	0	0	0	0	0	0	0	0	0
d__Eukaryota;p__Streptophyta;c__Magnoliopsida;o__Celastrales;f__Celastraceae;g__Euonymus;s__Euonymushamiltonianus	0	0	0	0	0	0	0	0	0	0	0	0	0	0	0	0	0	0	0	0	0	0	0	0	0	0	0	0	0	0	0	0	0	0	0	0	0	0	0	0	0	0	0	0	0	0	0	0	0
d__Eukaryota;p__Streptophyta;c__Magnoliopsida;o__Asterales;f__Asteraceae;g__Atractylodes;s__Atractylodesjaponica	0	0	0	0	0	0	0	0	0	0	0	0	0	0	0	0	0	0	0	0	0	0	0	0	0	0	0	0	0	0	0	0	0	0	0	0	0	0	0	0	0	0	0	0	0	0	0	0	0
d__Eukaryota;p__Streptophyta;c__Magnoliopsida;o__Asterales;f__Asteraceae;g__Erigeron;s__Erigeronstrigosus	0	0	0	0	0	0	0	0	0	0	1550	0	0	0	0	0	0	0	0	0	0	0	0	0	0	0	0	0	0	0	0	0	0	0	0	0	0	0	0	0	0	0	0	0	0	0	0	0	34
d__Eukaryota;p__Streptophyta;c__Magnoliopsida;o__Asterales;f__Asteraceae;g__Lactuca;s__Lactucasativa	0	0	0	0	0	0	0	0	0	0	0	0	0	0	0	0	0	0	0	0	0	0	0	0	0	0	0	0	0	0	0	0	0	0	0	0	0	0	0	0	0	0	0	0	0	0	0	0	0
d__Eukaryota;p__Streptophyta;c__Magnoliopsida;o__Solanales;f__Convolvulaceae;g__Convolvulus;s__Convolvuluschinensis	0	0	0	0	0	0	0	0	0	0	0	22	0	0	0	0	0	0	0	0	0	48	0	1	0	0	0	0	0	0	0	0	0	0	0	0	0	0	0	0	0	0	0	0	0	0	0	0	0
d__Eukaryota;p__Streptophyta;c__Magnoliopsida;o__Asterales;f__Asteraceae;g__Rudbeckia;s__Rudbeckiahirta	0	0	0	0	0	0	0	0	0	0	0	0	0	0	0	0	0	0	0	0	0	0	0	0	0	0	0	0	0	0	0	0	0	0	0	0	0	0	0	0	0	0	0	0	0	0	0	0	0
d__Eukaryota;p__Streptophyta;c__Magnoliopsida;o__Vitales;f__Vitaceae;g__Vitis;s__Vitisheyneana	0	0	0	0	0	0	0	0	0	0	0	0	0	0	0	0	0	0	0	0	0	0	0	0	0	0	0	0	0	0	0	0	0	0	0	0	0	0	0	0	0	0	0	0	0	0	0	0	0
d__Eukaryota;p__Streptophyta;c__Magnoliopsida;o__Asterales;f__Asteraceae;g__Rhaponticum;s__Rhaponticumuniflorum	0	0	0	0	0	0	0	0	0	0	0	0	0	0	0	0	0	0	0	0	0	0	0	0	0	0	0	0	0	0	0	0	0	0	0	0	0	0	0	0	0	0	0	0	0	0	0	0	0
d__Eukaryota;p__Streptophyta;c__Magnoliopsida;o__Commelinales;f__Commelinaceae;g__Commelina;s__Commelinacommunis	0	0	0	0	0	0	0	0	0	0	0	0	0	0	0	0	0	0	0	0	0	0	0	0	0	0	0	0	0	0	0	0	0	0	0	0	0	0	0	0	0	0	0	0	0	0	0	0	0
d__Eukaryota;p__Streptophyta;c__Magnoliopsida;o__Rosales;f__Rosaceae;g__Potentilla;s__Potentillamulticaulis	0	0	0	0	0	0	0	0	0	0	0	0	0	0	0	0	0	0	0	0	0	0	0	0	0	0	0	0	0	0	0	0	0	0	1	0	0	0	0	0	0	0	0	0	0	0	0	0	0
d__Eukaryota;p__Streptophyta;c__Magnoliopsida;o__Caryophyllales;f__Amaranthaceae;g__Alternanthera;s__Alternantherasessilis	0	0	0	0	0	0	0	0	0	0	0	0	0	0	0	0	0	0	0	0	0	0	0	0	0	0	0	0	0	0	0	0	0	0	0	0	0	0	0	0	0	0	0	0	0	0	0	0	0
d__Eukaryota;p__Streptophyta;c__Magnoliopsida;o__Fabales;f__Fabaceae;g__Phaseolus;s__Phaseolusvulgaris	0	0	0	0	0	0	0	0	0	0	0	0	0	0	0	0	0	0	0	0	0	0	0	0	0	0	0	0	0	0	0	0	0	0	0	0	0	0	0	0	0	0	0	0	0	0	0	0	0
d__Eukaryota;p__Streptophyta;c__Magnoliopsida;o__Asterales;f__Asteraceae;g__Artemisia;s__Artemisiamonosperma	0	1	0	0	0	0	0	0	0	0	0	0	0	0	0	0	0	0	0	0	0	0	0	0	0	0	0	0	0	0	0	0	0	0	0	0	0	0	0	0	0	0	0	0	0	0	0	0	0
d__Eukaryota;p__Streptophyta;c__Magnoliopsida;o__Caryophyllales;f__Chenopodiaceae;g__Suaeda;s__Suaedaglauca	0	0	0	0	0	0	0	0	0	0	0	0	0	0	0	0	0	0	0	0	0	0	0	0	0	0	0	0	0	0	0	0	0	0	0	0	0	0	0	0	0	0	0	0	0	0	0	0	0
d__Eukaryota;p__Streptophyta;c__Magnoliopsida;o__Poales;f__Poaceae;g__Digitaria;s__Digitariasanguinalis	0	0	0	0	0	0	0	0	0	0	0	0	0	0	0	0	0	0	0	0	0	0	0	0	0	0	0	0	0	0	0	0	0	0	0	0	0	0	0	0	0	0	0	0	0	0	0	0	0
d__Eukaryota;p__Streptophyta;c__Magnoliopsida;o__Fabales;f__Fabaceae;g__Phaseolus;s__Phaseoluscoccineus	0	0	0	0	0	0	0	0	0	0	0	0	0	0	0	0	0	0	0	0	0	0	0	0	0	0	0	0	0	0	0	0	0	0	0	0	0	0	0	0	0	0	0	0	0	0	0	0	0
d__Eukaryota;p__Streptophyta;c__Magnoliopsida;o__Rosales;f__Ulmaceae;g__Ulmus;s__Ulmuslaciniata	0	0	0	0	0	0	0	0	0	0	0	0	0	0	0	0	0	0	0	0	0	0	0	0	0	0	0	0	0	0	0	0	0	0	0	0	0	0	0	0	0	0	0	0	0	0	0	0	0
d__Eukaryota;p__Streptophyta;c__Magnoliopsida;o__Fabales;f__Fabaceae;g__Arachis;s__Arachishypogaea	0	0	0	0	0	0	0	0	0	0	0	0	21	10	0	0	0	0	0	0	0	0	0	0	0	0	0	0	0	0	0	0	0	0	0	0	0	0	0	0	0	0	0	0	0	0	0	0	0
d__Eukaryota;p__Streptophyta;c__Magnoliopsida;o__Asterales;f__Asteraceae;g__Taraxacum;s__Taraxacummongolicum	0	0	0	0	0	0	0	0	0	0	0	0	0	0	0	0	0	0	0	0	0	0	0	0	0	0	0	109	0	0	0	0	0	0	0	0	0	0	0	0	0	0	0	0	0	0	0	0	0
d__Eukaryota;p__Streptophyta;c__Magnoliopsida;o__Asterales;f__Asteraceae;g__Crepis;s__Crepisbiennis	0	0	0	0	0	0	0	0	0	0	0	0	0	0	0	0	0	0	0	0	0	0	0	0	0	0	0	0	0	0	0	0	0	0	0	0	0	0	0	0	0	0	0	0	0	0	0	0	0
d__Eukaryota;p__Streptophyta;c__Magnoliopsida;o__Lamiales;f__Oleaceae;g__Ligustrum;s__Ligustrumquihoui	0	0	0	0	0	0	0	0	0	0	0	0	0	0	0	0	0	0	0	0	0	0	0	0	0	0	0	0	0	0	0	0	0	0	0	0	0	0	0	0	0	0	0	0	0	0	0	0	0
d__Eukaryota;p__Streptophyta;c__Magnoliopsida;o__Ericales;f__Primulaceae;g__Embelia;s__Embeliaribes	0	0	0	0	0	0	0	0	0	0	0	0	0	0	0	0	0	0	0	0	0	0	0	0	0	0	0	0	0	0	0	0	0	0	0	0	0	0	0	0	0	0	0	0	0	0	0	0	0
d__Eukaryota;p__Streptophyta;c__Magnoliopsida;o__Poales;f__Poaceae;g__Aegilops;s__Aegilopsspeltoides	0	0	0	0	0	0	0	0	0	0	0	0	0	0	0	0	0	0	0	0	0	0	0	0	0	0	0	0	69	0	365	0	0	173	31	0	0	0	0	0	0	0	0	0	0	0	0	0	0
d__Eukaryota;p__Streptophyta;c__Magnoliopsida;o__Malpighiales;f__Salicaceae;g__Populus;s__PopulustremulaxPopulusalba	0	0	0	0	0	0	0	0	0	0	0	0	0	0	0	0	0	0	0	0	0	0	0	0	0	0	0	0	0	0	0	0	0	0	0	0	0	0	0	0	0	0	0	0	0	0	0	0	0
d__Eukaryota;p__Streptophyta;c__Magnoliopsida;o__Sapindales;f__Sapindaceae;g__Nephelium;s__Nepheliumchryseum	0	0	0	0	0	0	0	0	0	0	0	0	0	0	0	0	0	0	0	0	0	0	0	0	0	0	0	0	0	0	0	0	0	0	0	0	0	0	0	0	0	0	0	0	0	0	0	0	0
d__Eukaryota;p__Streptophyta;c__Magnoliopsida;o__Alismatales;f__Potamogetonaceae;g__Potamogeton;s__Potamogetonamplifolius	0	0	0	0	0	0	0	0	0	0	0	0	0	0	0	0	0	0	0	0	0	0	0	0	0	0	0	0	0	0	0	0	0	0	0	0	0	0	0	0	0	0	0	0	0	0	0	0	0
d__Eukaryota;p__Streptophyta;c__Pinopsida;o__Pinales;f__Pinaceae;g__Pinus;s__Pinusnigra	0	0	0	0	17	0	0	0	0	0	0	0	0	0	0	0	0	0	0	0	0	0	0	0	0	0	0	0	0	0	0	0	0	0	0	0	0	0	0	0	0	0	0	0	0	0	0	0	0
d__Eukaryota;p__Streptophyta;c__Magnoliopsida;o__Asterales;f__Asteraceae;g__Ixeris;s__Ixerisstolonifera	0	0	0	0	0	0	0	0	0	0	0	0	0	0	0	0	0	0	0	0	0	0	0	0	0	0	0	0	0	0	0	0	0	0	0	0	0	0	0	0	0	0	0	0	0	0	0	0	0
d__Eukaryota;p__Streptophyta;c__Magnoliopsida;o__Fagales;f__Juglandaceae;g__Juglans;s__Juglansmandshurica	0	0	0	0	0	0	0	0	0	0	0	0	0	0	0	0	0	0	0	0	0	0	0	0	0	0	0	0	0	0	0	0	0	0	0	0	0	0	0	0	0	0	0	0	0	0	0	0	0
d__Eukaryota;p__Streptophyta;c__Magnoliopsida;o__Asterales;f__Asteraceae;g__Flaveria;s__Flaveriabidentis	0	0	0	0	0	0	0	0	0	0	0	0	0	0	0	0	0	0	0	0	0	0	0	0	0	0	0	0	0	0	0	0	0	0	0	0	0	0	0	0	0	0	0	0	0	0	0	0	0
d__Eukaryota;p__Streptophyta;c__Magnoliopsida;o__Fagales;f__Fagaceae;g__Quercus;s__Quercusserrata	0	0	0	0	0	0	0	0	0	0	0	0	0	0	0	0	0	0	0	0	0	0	0	0	0	0	0	0	0	0	0	0	0	0	0	0	63	0	0	0	0	0	0	0	0	0	0	0	0
d__Eukaryota;p__Streptophyta;c__Magnoliopsida;o__Poales;f__Poaceae;g__Echinochloa;s__Echinochloacrus-galli	0	0	0	0	0	0	0	0	0	0	0	0	0	0	0	0	0	0	0	0	0	0	0	0	0	0	0	0	0	0	0	0	0	0	0	0	0	0	0	0	0	0	0	0	0	0	0	0	0
d__Eukaryota;p__Streptophyta;c__Magnoliopsida;o__Fabales;f__Fabaceae;g__Amorpha;s__Amorphacanescens	0	0	0	2	0	0	0	0	0	0	0	0	0	0	0	0	0	0	0	0	0	0	0	0	0	0	0	0	0	0	0	0	0	0	0	0	0	0	0	0	0	0	0	0	0	0	0	0	0
d__Eukaryota;p__Streptophyta;c__Magnoliopsida;o__Fagales;f__Fagaceae;g__Quercus;s__Quercusdentata	0	0	0	0	0	0	0	0	0	0	0	0	0	0	0	0	0	0	0	0	0	0	0	0	0	0	0	0	0	0	0	0	0	0	0	0	14	0	0	0	0	0	0	0	0	0	0	0	0
d__Eukaryota;p__Streptophyta;c__Magnoliopsida;o__Asterales;f__Asteraceae;g__Youngia;s__Youngiaerythrocarpa	0	0	27	6	0	0	4	86	87	62	0	0	31	0	1664	1	0	0	0	0	0	0	17	0	0	0	0	1	0	0	0	0	0	0	0	0	0	0	0	12	0	1	0	0	0	0	0	0	0
d__Eukaryota;p__Streptophyta;c__Magnoliopsida;o__Brassicales;f__Brassicaceae;g__Erysimum;s__Erysimumteretifolium	0	0	0	0	0	0	0	0	0	0	0	0	0	0	0	0	0	0	0	0	0	0	0	0	0	0	0	0	0	0	0	0	0	0	0	0	0	0	0	0	0	0	0	0	0	0	0	0	0
d__Eukaryota;p__Streptophyta;c__Magnoliopsida;o__Asterales;f__Asteraceae;g__Coreopsis;s__Coreopsissp.1154	0	0	0	0	0	0	0	0	0	0	0	0	0	0	0	0	0	0	0	0	0	0	0	0	0	0	0	0	0	0	0	0	0	0	0	0	0	0	0	0	0	0	0	0	0	0	0	0	0
d__Eukaryota;p__Streptophyta;c__Magnoliopsida;o__Poales;f__Poaceae;g__Digitaria;s__Digitariamilanjiana	0	0	0	0	0	0	0	0	0	0	0	0	0	0	0	0	0	0	0	0	0	0	0	0	0	0	0	0	0	0	0	0	0	0	0	0	0	0	0	0	0	0	0	0	0	0	0	0	0
d__Eukaryota;p__Streptophyta;c__Magnoliopsida;o__Asterales;f__Asteraceae;g__Crepis;s__Crepisruncinata	0	0	0	0	0	0	0	0	0	0	0	0	0	0	0	0	0	0	0	0	0	0	0	0	0	0	0	0	0	0	0	0	0	0	0	0	0	0	0	0	0	0	0	0	0	0	0	0	0
d__Eukaryota;p__Streptophyta;c__Magnoliopsida;o__Poales;f__Poaceae;g__Secale;s__Secalecereale	0	0	0	0	0	0	0	0	0	0	0	0	0	0	0	0	0	0	0	0	0	0	0	0	0	0	0	0	0	0	0	0	0	0	0	0	0	0	0	0	0	0	0	0	0	0	0	0	0
d__Eukaryota;p__Streptophyta;c__Magnoliopsida;o__Asterales;f__Asteraceae;g__Artemisia;s__Artemisiapubescens	0	0	0	0	0	0	0	0	0	0	0	0	0	0	0	0	0	0	0	0	0	0	0	0	0	0	0	0	0	0	0	0	0	0	0	0	0	0	0	0	0	0	0	0	0	0	0	0	0
d__Eukaryota;p__Streptophyta;c__Magnoliopsida;o__Fagales;f__Fagaceae;g__Quercus;s__Quercusacutissima	0	0	0	0	0	0	0	0	0	0	0	0	0	0	0	0	0	0	0	0	0	0	0	0	0	0	0	0	0	0	0	0	0	0	0	0	0	0	0	0	0	0	0	0	0	0	0	0	0
d__Eukaryota;p__Streptophyta;c__Magnoliopsida;o__Asterales;f__Asteraceae;g__Echinops;s__Echinopsgmelinii	0	0	0	0	0	0	0	0	0	0	0	0	0	0	0	0	0	0	0	0	0	0	0	0	0	0	0	0	0	0	0	0	0	0	0	0	0	0	0	0	0	0	0	0	0	0	0	0	0
d__Eukaryota;p__Streptophyta;c__Magnoliopsida;o__Lamiales;f__Oleaceae;g__Forsythia;s__Forsythiasuspensa	0	0	0	0	0	0	0	0	0	0	0	0	0	0	0	0	0	0	0	0	0	0	0	0	0	0	0	0	0	0	0	0	0	0	0	0	0	0	0	0	0	0	0	0	0	0	0	0	0
d__Eukaryota;p__Streptophyta;c__Magnoliopsida;o__Cucurbitales;f__Cucurbitaceae;g__Cucumis;s__Cucumissativus	0	32	0	0	0	0	0	0	0	0	0	0	0	24	0	0	0	0	0	0	0	0	0	0	0	1	0	0	0	0	0	0	0	0	0	0	0	0	0	0	0	0	0	0	0	0	0	0	0
d__Eukaryota;p__Streptophyta;c__Magnoliopsida;o__Fabales;f__Fabaceae;g__Astragalus;s__Astragalusmongholicus	0	0	0	0	0	0	0	0	0	0	0	0	0	0	0	0	0	0	0	0	0	0	0	0	0	0	0	0	0	0	0	0	0	0	0	0	0	0	0	0	0	0	0	0	0	0	0	0	0
d__Eukaryota;p__Streptophyta;c__Magnoliopsida;o__Sapindales;f__Simaroubaceae;g__Ailanthus;s__Ailanthusaltissimus	0	0	0	0	0	0	0	0	0	0	0	0	0	0	0	0	0	0	0	0	0	0	0	0	0	0	0	0	0	0	0	0	0	0	0	0	0	0	0	0	0	0	0	0	0	0	0	0	0
d__Eukaryota;p__Streptophyta;c__Magnoliopsida;o__Fabales;f__Fabaceae;g__Melilotus;s__Melilotusalbus	0	0	0	0	0	0	0	0	0	0	0	0	0	0	0	0	0	0	0	0	0	0	0	0	0	0	0	0	0	0	0	0	0	0	0	0	0	0	0	0	0	0	0	0	0	0	0	0	0
d__Eukaryota;p__Streptophyta;c__Magnoliopsida;o__Lamiales;f__Verbenaceae;g__Glandularia;s__Glandulariaaristigera	0	29	0	0	34	0	0	0	0	0	0	0	50	0	154	147	15	0	327	436	316	0	0	0	0	0	0	0	0	0	0	0	0	0	0	0	0	0	0	0	0	0	0	0	0	0	0	0	0
d__Eukaryota;p__Streptophyta;c__Magnoliopsida;o__Caryophyllales;f__Portulacaceae;g__Portulaca;s__Portulacaoleracea	0	0	0	0	0	0	0	0	0	0	0	0	0	0	0	0	0	0	0	0	0	0	0	0	0	0	0	0	0	0	0	0	0	0	0	0	0	0	0	0	0	0	0	0	0	0	0	0	0
d__Eukaryota;p__Streptophyta;c__Magnoliopsida;o__Rosales;f__Ulmaceae;g__Ulmus;s__Ulmusszechuanica	0	0	0	0	0	0	0	0	0	0	0	0	0	0	0	0	0	0	0	0	0	0	0	0	0	0	0	0	0	0	0	0	0	1	0	0	0	0	0	0	0	0	0	0	0	0	0	0	0
d__Eukaryota;p__Streptophyta;c__Magnoliopsida;o__Caryophyllales;f__Polygonaceae;g__Rumex;s__Rumexkandavanicus	0	0	0	0	0	0	0	0	0	0	0	0	0	0	0	0	0	0	0	0	0	0	0	0	0	0	0	0	0	0	0	0	0	0	0	0	0	0	0	0	0	0	0	0	0	0	0	0	0
d__Eukaryota;p__Streptophyta;c__Magnoliopsida;o__Lamiales;f__Plantaginaceae;g__Veronica;s__Veronicascardica	0	0	0	0	0	0	0	0	0	0	0	0	0	0	0	0	0	0	0	0	0	0	0	0	0	0	0	0	0	0	0	0	0	0	0	0	0	0	0	0	0	0	0	0	0	0	0	0	0
d__Eukaryota;p__Streptophyta;c__Magnoliopsida;o__Asterales;f__Asteraceae;g__Gaillardia;s__Gaillardiaaristata	0	0	0	0	0	0	0	0	0	0	0	0	0	0	0	0	0	0	0	0	0	0	0	0	0	0	0	0	0	0	0	0	0	0	0	0	0	0	0	0	0	0	0	0	0	0	0	0	0
d__Eukaryota;p__Streptophyta;c__Magnoliopsida;o__Solanales;f__Solanaceae;g__Solanum;s__Solanumnigrum	0	0	0	0	0	0	0	0	0	0	0	0	0	0	0	0	0	0	0	0	0	0	0	0	0	0	0	0	0	0	0	0	0	0	0	0	0	0	0	0	0	0	0	0	0	0	0	0	0
d__Eukaryota;p__Streptophyta;c__Magnoliopsida;o__Asparagales;f__Amaryllidaceae;g__Allium;s__Alliumneriniflorum	0	0	0	0	0	0	0	0	0	0	0	0	0	0	0	0	0	0	0	0	0	0	0	0	0	0	0	0	0	0	0	0	0	0	0	0	0	0	0	0	0	0	0	0	0	0	0	0	0
d__Eukaryota;p__Streptophyta;c__Magnoliopsida;o__Fabales;f__Fabaceae;g__Styphnolobium;s__Styphnolobiumjaponicum	0	0	0	0	0	0	0	0	0	0	0	0	0	0	0	0	0	0	0	0	0	0	0	0	0	0	0	0	0	0	0	0	0	0	0	0	0	0	0	0	0	0	0	0	0	0	0	0	0
d__Eukaryota;p__Streptophyta;c__Magnoliopsida;o__Caryophyllales;f__Talinaceae;g__Talinum;s__Talinumpaniculatum	0	0	0	0	0	0	0	0	0	0	0	0	0	0	0	0	0	0	0	0	0	0	0	0	0	0	0	0	0	0	0	0	0	0	0	0	0	0	0	0	0	0	0	0	0	0	0	0	0
d__Eukaryota;p__Streptophyta;c__Magnoliopsida;o__Commelinales;f__Commelinaceae;g__Callisia;s__Callisiagentlei	0	0	0	0	0	0	0	0	0	0	0	0	0	0	0	0	0	0	0	0	0	0	0	0	0	0	0	0	0	0	0	0	0	0	0	0	0	0	0	0	0	0	0	0	0	0	0	0	0
d__Eukaryota;p__Streptophyta;c__Magnoliopsida;o__Apiales;f__Apiaceae;g__Daucus;s__Daucuscarota	0	0	0	0	0	0	0	0	0	0	0	0	0	0	0	0	0	0	0	0	0	0	0	0	0	0	0	0	0	0	0	0	0	0	0	0	0	0	0	0	0	0	0	0	0	0	0	0	0
d__Eukaryota;p__Streptophyta;c__Magnoliopsida;o__Rosales;f__Rosaceae;g__Prunus;s__Prunuspersica	0	0	0	0	0	0	0	0	0	0	0	0	0	0	0	0	0	0	0	0	0	0	0	0	0	0	0	0	0	0	0	0	0	0	0	0	0	0	0	0	0	0	0	0	0	0	0	0	0
d__Eukaryota;p__Streptophyta;c__Magnoliopsida;o__Rosales;f__Rosaceae;g__Potentilla;s__Potentilladiscolor	0	0	0	0	0	0	0	0	0	0	0	0	0	0	0	0	0	0	0	0	0	0	0	0	0	0	0	0	0	0	0	0	0	0	0	0	0	0	0	0	0	0	0	0	0	0	0	0	0
d__Eukaryota;p__Streptophyta;c__Magnoliopsida;o__Sapindales;f__Sapindaceae;g__Acer;s__Acerpictum	0	0	0	0	0	0	0	0	0	0	0	0	0	0	0	0	0	0	0	0	0	0	0	0	0	0	0	0	0	0	0	0	0	0	0	0	0	0	0	0	0	0	0	0	0	0	0	0	0
d__Eukaryota;p__Streptophyta;c__Magnoliopsida;o__Poales;f__Poaceae;g__Eleusine;s__Eleusineindica	0	0	0	0	0	0	0	0	0	0	0	0	0	0	0	0	0	0	0	0	0	0	0	0	0	0	0	0	0	0	0	0	0	0	0	0	0	0	0	0	0	0	0	0	0	0	0	0	0
d__Eukaryota;p__Streptophyta;c__Magnoliopsida;o__Asterales;f__Asteraceae;g__Bidens;s__Bidensgraveolens	0	0	0	0	0	0	0	0	0	0	0	0	0	0	0	0	0	0	0	0	0	0	0	0	0	0	0	0	0	0	0	0	0	0	0	0	0	0	0	0	0	0	0	0	0	0	0	0	0
d__Eukaryota;p__Streptophyta;c__Magnoliopsida;o__Poales;f__Cyperaceae;g__Carex;s__Carexnigra	0	0	0	0	0	0	0	0	0	0	0	0	0	0	0	0	0	0	0	0	0	0	0	0	0	0	0	0	0	0	0	0	0	0	0	0	0	0	0	0	0	0	0	0	0	0	0	0	0
d__Eukaryota;p__Streptophyta;c__Magnoliopsida;o__Asterales;f__Asteraceae;g__Cosmos;s__Cosmossulphureus	0	0	0	0	0	0	0	0	0	0	0	0	0	0	0	0	0	0	0	0	0	0	0	0	0	0	0	0	0	0	0	0	0	0	0	0	0	0	0	0	0	0	0	0	0	0	0	0	0
d__Eukaryota;p__Streptophyta;c__Magnoliopsida;o__Caryophyllales;f__Amaranthaceae;g__Amaranthus;s__Amaranthushypochondriacus	0	0	0	16	0	0	0	0	0	8	0	0	0	0	0	0	0	0	0	0	0	0	0	0	0	0	0	0	0	0	0	0	0	0	0	0	0	0	0	0	0	0	0	0	0	0	0	0	0
d__Eukaryota;p__Streptophyta;c__Magnoliopsida;o__Zygophyllales;f__Zygophyllaceae;g__Tribulus;s__Tribulusterrestris	0	0	0	0	0	0	0	0	0	0	0	0	0	0	0	0	0	0	0	0	0	0	0	0	0	0	0	0	0	0	0	0	0	0	0	0	0	0	0	0	0	0	0	0	0	0	0	0	0
d__Eukaryota;p__Streptophyta;c__Magnoliopsida;o__Rosales;f__Rosaceae;g__Fragaria;s__Fragariavesca	0	0	0	0	0	0	0	0	0	0	0	0	0	0	0	0	0	0	0	0	0	0	0	0	0	0	0	0	0	0	0	0	0	0	0	0	0	0	0	0	0	0	0	0	0	0	0	0	0
d__Eukaryota;p__Streptophyta;c__Magnoliopsida;o__Asterales;f__Asteraceae;g__Helianthus;s__Helianthussp.DH-2012	0	0	0	0	0	0	0	0	0	0	0	0	0	0	0	0	0	0	0	0	0	0	0	0	0	0	0	0	0	0	0	0	0	0	0	0	0	0	0	0	0	0	0	0	0	0	0	0	0
d__Eukaryota;p__Streptophyta;c__Magnoliopsida;o__Gentianales;f__Rubiaceae;g__Rubia;s__Rubiapallida	0	0	0	0	0	0	0	0	0	0	0	0	0	0	0	0	0	0	0	0	0	0	0	0	0	0	0	0	0	0	0	0	0	0	0	0	0	0	0	0	0	0	0	0	0	0	0	0	0
d__Eukaryota;p__Streptophyta;c__Magnoliopsida;o__Caryophyllales;f__Chenopodiaceae;g__Suaeda;s__Suaedamaritima	0	0	0	0	0	0	0	0	0	0	0	0	0	0	0	0	0	0	0	0	0	0	0	0	0	0	0	0	0	0	0	0	0	0	0	0	0	0	0	0	0	0	0	0	0	0	0	0	0
d__Eukaryota;p__Streptophyta;c__Magnoliopsida;o__Solanales;f__Solanaceae;g__Nicotiana;s__Nicotianasylvestris	0	0	0	0	0	0	0	0	0	0	0	0	0	0	0	0	0	0	0	0	0	0	0	0	0	0	0	0	0	0	0	0	0	0	0	0	0	0	0	0	0	0	0	0	0	0	0	0	0
d__Eukaryota;p__Streptophyta;c__Magnoliopsida;o__Santalales;f__Cervantesiaceae;g__Scleropyrum;s__Scleropyrumwallichianum	0	0	0	0	0	0	0	0	0	0	0	0	0	0	0	0	0	0	0	0	0	0	0	0	0	0	0	0	0	0	0	0	0	0	0	0	0	0	0	0	0	0	0	0	0	0	0	0	0
d__Eukaryota;p__Streptophyta;c__Magnoliopsida;o__Malvales;f__Malvaceae;g__Gossypium;s__Gossypiumherbaceum	0	0	26	0	0	31	0	0	0	0	0	0	0	34	0	0	0	0	0	0	0	0	0	0	0	0	0	0	0	0	0	0	0	0	0	0	0	0	0	0	0	0	0	0	0	0	0	0	0
d__Eukaryota;p__Streptophyta;c__Magnoliopsida;o__Caryophyllales;f__Polygonaceae;g__Rumex;s__Rumextrisetifer	0	0	0	0	0	0	0	0	0	0	0	0	0	0	0	0	0	0	0	0	0	0	0	0	0	0	0	0	460	0	0	0	0	245	0	0	0	0	0	0	0	0	0	0	0	0	0	0	0
d__Eukaryota;p__Streptophyta;c__Magnoliopsida;o__Poales;f__Poaceae;g__Lolium;s__Loliumloliaceum	0	0	0	0	0	0	0	0	0	0	0	0	0	0	0	0	0	0	0	0	0	0	0	0	0	0	0	0	0	0	0	0	0	0	0	0	0	0	0	0	0	0	0	0	0	0	0	0	0
d__Eukaryota;p__Streptophyta;c__Magnoliopsida;o__Fabales;f__Fabaceae;g__Glycine;s__Glycinemax	0	0	0	0	0	0	0	0	0	0	0	0	0	0	0	0	0	0	0	0	0	0	0	0	0	0	0	0	0	0	0	0	0	0	0	0	0	0	0	0	0	0	0	0	0	0	0	0	0
d__Eukaryota;p__Streptophyta;c__Magnoliopsida;o__Rosales;f__Rosaceae;g__Potentilla;s__Potentillaindica	0	0	0	0	0	0	0	0	0	0	0	0	0	0	0	0	0	0	0	0	0	0	0	0	0	0	0	0	0	0	0	0	0	0	0	0	0	0	0	0	0	0	0	0	0	0	0	0	0
d__Eukaryota;p__Streptophyta;c__Magnoliopsida;o__Malvales;f__Thymelaeaceae;g__Daphne;s__Daphnepapyracea	0	0	0	0	0	0	0	0	0	0	0	0	0	0	0	0	0	0	0	0	0	0	0	0	0	0	0	0	0	0	0	0	0	0	0	0	0	0	0	0	0	0	0	0	0	0	0	0	0
d__Eukaryota;p__Streptophyta;c__Magnoliopsida;o__Asterales;f__Asteraceae;g__Bidens;s__Bidensaurea	0	0	0	0	0	0	0	0	0	0	0	0	0	0	0	0	0	0	0	0	0	0	0	0	0	0	0	0	0	0	0	0	0	0	0	0	0	0	0	0	0	0	0	0	0	0	0	0	0
d__Eukaryota;p__Streptophyta;c__Pinopsida;o__Pinales;f__Pinaceae;g__Pinus;s__Pinushwangshanensis	0	0	0	0	3	0	0	0	0	0	0	0	0	0	0	0	0	0	0	0	0	0	0	0	0	0	0	0	0	0	0	0	0	0	0	0	0	0	0	0	0	0	0	0	0	0	0	0	0
d__Eukaryota;p__Streptophyta;c__Magnoliopsida;o__Asterales;f__Asteraceae;g__Picris;s__Picrishieracioides	0	0	0	0	0	0	0	0	0	0	0	0	0	0	0	0	0	0	0	0	0	0	0	0	0	0	0	0	0	0	0	0	1	0	0	0	0	0	0	0	0	0	0	0	0	0	0	0	0
d__Eukaryota;p__Streptophyta;c__Magnoliopsida;o__Solanales;f__Solanaceae;g__Solanum;s__Solanumlycopersicum	0	0	0	0	0	0	0	0	0	0	0	0	0	0	0	0	0	0	0	0	0	0	0	0	0	0	0	0	0	0	0	0	0	0	0	0	0	0	0	0	0	0	0	0	0	0	0	0	0
d__Eukaryota;p__Streptophyta;c__Magnoliopsida;o__Solanales;f__Convolvulaceae;g__Cuscuta;s__Cuscutajaponica	0	0	0	0	0	0	0	0	0	0	0	0	0	0	0	0	0	0	0	0	0	0	0	0	0	0	0	0	0	0	0	0	0	0	0	0	0	0	0	0	0	0	0	0	0	0	0	0	0
d__Eukaryota;p__Streptophyta;c__Magnoliopsida;o__Poales;f__Poaceae;g__Oryza;s__Oryzasativa	0	0	0	0	0	0	0	0	0	0	0	0	0	0	0	0	0	0	0	0	0	0	0	0	0	0	0	0	0	0	0	0	0	0	0	0	0	0	0	0	0	0	0	0	0	0	0	0	0
d__Eukaryota;p__Streptophyta;c__Magnoliopsida;o__Malvales;f__Malvaceae;g__Tilia;s__Tiliaxeuropaea	0	0	0	0	0	0	0	0	0	0	0	0	0	0	0	0	0	0	0	0	0	0	0	0	0	0	0	0	0	0	0	0	0	0	0	0	0	0	0	0	0	0	0	0	0	0	0	0	0
d__Eukaryota;p__Streptophyta;c__Magnoliopsida;o__Ranunculales;f__Ranunculaceae;g__Thalictrum;s__Thalictrumcultratum	0	0	0	0	0	0	0	0	0	0	0	0	0	0	0	0	0	0	0	0	0	0	0	0	0	0	0	0	0	0	0	0	0	0	0	0	0	0	0	0	0	0	0	0	0	0	0	0	0
d__Eukaryota;p__Streptophyta;c__Magnoliopsida;o__Fabales;f__Fabaceae;g__Robinia;s__Robiniapseudoacacia	0	0	0	0	0	0	0	0	0	0	0	0	0	0	0	0	0	0	0	0	0	0	0	0	0	0	0	0	0	0	0	0	0	0	0	0	0	0	0	0	0	0	0	0	0	0	0	0	0
d__Eukaryota;p__Streptophyta;c__Magnoliopsida;o__Brassicales;f__Brassicaceae;g__Brassica;s__Brassicajuncea	8	0	0	0	1	0	14	0	0	0	12	0	0	0	0	0	0	0	0	0	0	0	7	3	4	27	8	0	0	0	0	13	0	0	1	0	1	9	11	26	23	13	6	4	9	1	4	1	0
d__Eukaryota;p__Streptophyta;c__Magnoliopsida;o__Fabales;f__Fabaceae;g__Pisum;s__Pisumsativum	0	0	0	0	0	0	0	0	0	0	0	0	0	0	0	0	0	0	0	0	0	0	0	0	0	0	0	0	0	0	0	0	0	0	0	0	0	0	0	0	0	0	0	0	0	0	0	0	0
d__Eukaryota;p__Streptophyta;c__Magnoliopsida;o__Malpighiales;f__Euphorbiaceae;g__Acalypha;s__Acalyphaaustralis	0	0	0	0	0	0	0	0	0	0	0	0	0	0	0	0	0	0	0	0	0	0	0	0	0	0	0	0	0	0	0	0	0	0	0	0	0	0	0	0	0	0	0	0	0	0	0	0	0
d__Eukaryota;p__Streptophyta;c__Magnoliopsida;o__Lamiales;f__Lamiaceae;g__Isodon;s__Isodonjaponicus	0	0	0	0	0	0	0	0	0	0	0	0	0	0	0	0	0	0	0	0	0	0	0	0	0	0	0	0	0	0	0	0	0	0	0	0	0	0	0	0	0	0	0	0	0	0	0	0	0
d__Eukaryota;p__Streptophyta;c__Magnoliopsida;o__Lamiales;f__Verbenaceae;g__Glandularia;s__Glandularialaciniata	0	0	0	0	2	0	0	0	0	0	0	0	0	0	165	36	0	0	134	313	117	0	0	0	0	0	0	0	0	0	0	0	0	0	0	0	0	0	0	0	0	0	0	0	0	0	0	0	0
d__Eukaryota;p__Streptophyta;c__Magnoliopsida;o__Lamiales;f__Lamiaceae;g__Salvia;s__Salviafarinacea	0	0	0	0	0	0	0	0	0	0	0	0	0	0	0	0	0	0	0	0	0	0	0	0	0	0	0	0	0	0	0	0	0	0	0	0	0	0	0	0	0	0	0	0	0	0	0	0	0
d__Eukaryota;p__Streptophyta;c__Magnoliopsida;o__Caryophyllales;f__Amaranthaceae;g__Achyranthes;s__Achyranthesbidentata	0	0	0	0	0	0	0	0	0	0	0	0	0	0	0	0	0	0	0	0	0	0	0	0	0	0	0	0	0	0	0	0	0	0	0	0	0	0	0	0	0	0	0	0	0	0	0	0	0
d__Eukaryota;p__Streptophyta;c__Magnoliopsida;o__Solanales;f__Solanaceae;g__Lycium;s__Lyciumchinense	0	0	0	0	0	0	0	0	0	0	0	0	0	0	0	0	0	0	0	0	0	0	0	0	0	0	0	0	0	0	0	0	0	0	0	0	0	0	0	0	0	0	0	0	0	0	0	0	0
d__Eukaryota;p__Streptophyta;c__Magnoliopsida;o__Ranunculales;f__Ranunculaceae;g__Ranunculus;s__Ranunculusjaponicus	0	0	0	0	0	0	0	0	0	0	0	0	0	0	0	0	0	0	0	0	0	0	0	0	0	0	0	0	0	0	0	0	0	0	0	0	0	0	0	0	0	0	0	0	0	0	0	0	0
d__Eukaryota;p__Streptophyta;c__Magnoliopsida;o__Fabales;f__Fabaceae;g__Vigna;s__Vignaradiata	0	0	0	0	0	0	0	0	0	0	0	0	0	0	0	0	0	0	0	0	0	0	0	0	0	0	0	0	0	0	0	0	0	0	0	0	0	0	0	0	0	0	0	0	0	0	0	0	0
d__Eukaryota;p__Streptophyta;c__Magnoliopsida;o__Caryophyllales;f__Polygonaceae;g__Koenigia;s__Koenigiasp.LB0957	0	0	0	0	0	0	0	0	0	0	0	0	0	0	0	0	0	0	0	0	0	0	0	0	0	0	0	0	0	0	0	0	0	0	0	0	0	0	0	0	0	0	0	0	0	0	0	0	0
d__Eukaryota;p__Streptophyta;c__Magnoliopsida;o__Asterales;f__Asteraceae;g__Taraxacum;s__Taraxacumtibetanum	0	0	0	0	0	0	0	0	0	0	0	0	0	0	0	0	0	0	0	0	0	0	0	0	0	0	0	8	0	0	0	0	0	0	0	0	0	0	0	0	0	0	0	0	0	0	0	0	0
d__Eukaryota;p__Streptophyta;c__Magnoliopsida;o__Apiales;f__Araliaceae;g__Hydrocotyle;s__Hydrocotylevulgaris	0	0	0	0	0	0	0	0	0	0	0	0	0	0	0	0	0	0	0	0	0	0	0	0	0	0	0	0	0	0	0	0	0	0	0	0	0	0	0	0	0	0	0	0	0	0	0	0	0
d__Eukaryota;p__Streptophyta;c__Magnoliopsida;o__Asterales;f__Asteraceae;g__Youngia;s__Youngialongiflora	0	17	2	3	0	5	0	2	0	0	0	0	0	0	129	2	0	494	0	0	0	0	0	0	0	0	0	0	0	0	0	0	0	0	0	0	0	0	0	0	0	0	0	0	0	0	0	0	1
d__Eukaryota;p__Streptophyta;c__Magnoliopsida;o__Rosales;f__Rosaceae;g__Sanguisorba;s__Sanguisorbaofficinalis	0	0	0	0	0	0	0	0	0	0	0	0	0	0	0	0	0	0	0	0	0	0	0	0	0	0	0	0	0	0	0	0	0	0	0	0	0	0	0	0	0	0	0	0	0	0	0	0	0
d__Eukaryota;p__Streptophyta;c__Magnoliopsida;o__Asterales;f__Asteraceae;g__Crepidiastrum;s__Crepidiastrumsonchifolium	0	0	0	0	0	0	0	0	4	0	0	0	0	0	0	0	3	0	0	0	0	0	0	0	0	0	0	0	0	0	0	0	0	0	0	0	0	0	0	0	0	0	0	0	0	0	0	0	0
d__Eukaryota;p__Streptophyta;c__Magnoliopsida;o__Cucurbitales;f__Cucurbitaceae;g__Cionosicys;s__Cionosicysexcisus	0	0	0	0	0	0	0	0	0	0	0	0	0	0	0	0	0	0	0	0	0	0	0	0	0	0	0	0	0	0	0	0	0	0	0	0	0	0	0	0	0	0	0	0	0	0	0	0	0
d__Eukaryota;p__Streptophyta;c__Magnoliopsida;o__Ranunculales;f__Ranunculaceae;g__Clematis;s__Clematisarmandii	0	0	0	0	0	0	0	0	0	0	0	0	0	0	0	0	0	0	0	0	0	0	0	0	1	0	0	0	0	0	0	0	0	0	0	0	0	0	0	0	0	0	0	0	0	0	0	0	0
d__Eukaryota;p__Streptophyta;c__Magnoliopsida;o__Fagales;f__Juglandaceae;g__Juglans;s__Juglansregia	0	0	0	0	0	0	0	0	0	0	0	0	0	0	0	0	0	0	0	0	0	0	0	0	0	0	0	0	0	0	0	0	0	0	0	0	0	0	0	0	0	0	0	0	0	0	0	0	0
d__Eukaryota;p__Streptophyta;c__Magnoliopsida;o__Rosales;f__Rhamnaceae;g__Rhamnus;s__Rhamnusrhodopea	0	0	0	0	0	0	0	0	0	0	0	0	0	0	0	0	0	0	0	0	0	0	0	0	0	0	0	0	0	0	0	0	0	0	0	0	0	0	0	0	0	0	0	0	0	0	0	0	0
d__Eukaryota;p__Streptophyta;c__Magnoliopsida;o__Poales;f__Poaceae;g__Dinebra;s__Dinebrachinensis	0	0	0	0	0	0	0	0	0	0	0	0	0	0	0	0	0	0	0	0	0	0	0	0	0	0	0	0	0	0	0	0	0	0	0	0	0	0	0	0	0	0	0	0	0	0	0	0	0
d__Eukaryota;p__Streptophyta;c__Magnoliopsida;o__Rosales;f__Ulmaceae;g__Ulmus;s__Ulmuspumila	0	0	0	0	0	0	0	0	0	0	0	0	0	0	0	0	0	0	0	0	0	0	0	0	0	0	0	0	0	0	0	0	0	0	0	0	0	0	0	0	0	0	0	0	0	0	0	0	0
d__Eukaryota;p__Streptophyta;c__Magnoliopsida;o__Asterales;f__Asteraceae;g__Ixeris;s__Ixeristamagawaensis	0	0	0	0	0	0	0	0	0	0	0	0	0	0	0	0	0	0	0	0	0	0	0	0	0	0	0	0	0	0	0	0	0	0	0	0	0	0	0	0	0	0	0	0	0	0	0	0	0
d__Eukaryota;p__Streptophyta;c__Magnoliopsida;o__Asterales;f__Asteraceae;g__Taraxacum;s__Taraxacumobtusifrons	0	0	0	0	0	0	0	0	0	0	0	0	0	0	0	0	0	0	0	0	0	0	0	0	0	0	0	0	0	0	0	0	0	0	0	0	0	0	0	0	0	0	0	0	0	0	0	0	0
d__Eukaryota;p__Streptophyta;c__Magnoliopsida;o__Lamiales;f__Lamiaceae;g__Thymus;s__Thymusquinquecostatus	0	0	0	0	0	0	0	0	0	0	0	0	0	0	0	0	0	0	0	0	0	0	0	0	0	0	0	0	0	0	0	0	0	0	0	0	0	0	0	0	0	0	0	0	0	0	0	0	0
d__Eukaryota;p__Streptophyta;c__Magnoliopsida;o__Asterales;f__Asteraceae;g__Bidens;s__Bidensbipinnata	0	0	0	0	0	0	0	0	0	0	0	0	0	0	0	0	0	0	0	0	0	0	0	0	0	0	0	0	0	0	0	0	0	0	0	0	0	0	0	0	0	0	0	0	0	0	0	0	0
d__Eukaryota;p__Streptophyta;c__Magnoliopsida;o__Asterales;f__Asteraceae;g__Bidens;s__Bidensfrondosa	0	0	0	0	0	0	0	0	0	0	0	0	0	0	0	0	0	0	0	0	0	0	0	0	0	0	0	0	0	0	0	0	0	0	0	0	0	0	0	0	0	0	0	0	0	0	0	0	0
d__Eukaryota;p__Streptophyta;c__Magnoliopsida;o__Solanales;f__Convolvulaceae;g__Ipomoea;s__Ipomoeapurpurea	0	0	0	0	0	0	0	0	0	0	0	0	0	0	0	0	0	0	0	0	0	0	0	0	0	0	0	0	0	0	0	0	0	0	0	0	0	0	0	0	0	0	0	0	0	0	0	0	0
d__Eukaryota;p__Streptophyta;c__Magnoliopsida;o__Oxalidales;f__Oxalidaceae;g__Oxalis;s__Oxaliscorniculata	0	0	0	0	0	0	0	0	0	0	0	0	0	0	0	0	0	0	0	0	0	0	0	0	0	0	0	0	0	0	0	0	0	0	0	0	0	0	0	0	0	0	0	0	0	0	0	0	0
d__Eukaryota;p__Streptophyta;c__Magnoliopsida;o__Fabales;f__Fabaceae;g__Lablab;s__Lablabpurpureus	0	0	0	0	0	0	0	0	0	0	0	0	0	0	0	0	0	0	0	0	0	0	0	0	0	0	0	0	0	0	0	0	0	0	0	0	0	0	0	0	0	0	0	0	0	0	0	0	0
d__Eukaryota;p__Streptophyta;c__Magnoliopsida;o__Solanales;f__Convolvulaceae;g__Calystegia;s__Calystegiasp.PMR-2019	0	0	0	0	0	0	0	0	0	0	0	0	0	0	0	0	0	0	0	0	0	5	0	0	0	0	0	0	0	0	0	0	0	0	0	1	0	0	0	0	0	0	0	0	0	0	0	0	0
d__Eukaryota;p__Streptophyta;c__Magnoliopsida;o__Lamiales;f__Oleaceae;g__Forsythia;s__Forsythiaovata	0	0	0	0	0	0	0	0	0	0	0	0	0	0	0	0	0	0	0	0	0	0	0	0	0	0	0	0	0	0	0	0	0	0	0	0	0	0	0	0	0	0	0	0	0	0	0	0	0
d__Eukaryota;p__Streptophyta;c__Magnoliopsida;o__Fabales;f__Fabaceae;g__Melilotus;s__Melilotusofficinalis	0	0	0	0	0	0	0	0	0	0	0	0	0	0	0	0	0	0	0	0	0	0	0	0	0	0	0	0	0	0	0	0	0	0	0	0	0	0	0	0	0	0	0	0	0	0	0	0	0
d__Eukaryota;p__Streptophyta;c__Magnoliopsida;o__Asterales;f__Asteraceae;g__Tagetes;s__Tagetespatula	0	0	0	0	0	0	0	0	0	0	0	0	0	0	0	0	0	0	0	0	0	0	0	0	0	0	0	0	0	0	0	0	0	0	0	0	0	0	0	0	0	0	0	0	0	0	0	0	0
d__Eukaryota;p__Streptophyta;c__Magnoliopsida;o__Malpighiales;f__Euphorbiaceae;g__Euphorbia;s__Euphorbiaesula	0	0	0	0	0	0	0	0	0	0	0	0	0	0	0	0	0	0	0	0	0	0	0	0	0	0	0	0	0	0	0	0	0	0	0	2	4	0	0	0	0	1	0	2	0	0	0	0	0
d__Eukaryota;p__Streptophyta;c__Magnoliopsida;o__Malpighiales;f__Euphorbiaceae;g__Mallotus;s__Mallotusrepandus	0	0	0	0	0	0	0	0	0	0	0	0	0	0	0	0	0	0	0	0	0	0	0	0	0	0	0	0	0	0	0	0	0	0	0	0	0	0	0	0	0	0	0	0	0	0	0	0	0
d__Eukaryota;p__Streptophyta;c__Magnoliopsida;o__Fagales;f__Fagaceae;g__Quercus;s__Quercusannulata	0	0	0	0	0	0	0	0	0	0	0	0	0	0	0	0	0	0	0	0	0	0	0	0	0	0	0	0	0	0	0	0	0	0	0	0	0	0	0	0	0	0	0	0	0	0	0	0	0
d__Eukaryota;p__Streptophyta;c__Magnoliopsida;o__Asterales;f__Asteraceae;g__Paraixeris;s__Paraixerisdenticulata	0	0	0	0	0	0	0	0	0	0	0	0	0	0	0	0	0	0	0	0	0	0	0	0	0	0	0	0	0	0	0	0	0	0	0	0	0	0	0	0	0	0	0	0	0	0	0	0	0
d__Eukaryota;p__Streptophyta;c__Magnoliopsida;o__Fabales;f__Fabaceae;g__Senna;s__Sennatora	0	0	0	0	0	0	0	0	0	0	0	0	0	0	0	0	0	0	0	0	0	0	0	0	0	0	0	0	0	0	0	0	0	0	0	0	0	0	0	0	0	0	0	0	0	0	0	0	0
d__Eukaryota;p__Streptophyta;c__Magnoliopsida;o__Apiales;f__Apiaceae;g__Bupleurum;s__Bupleurumscorzonerifolium	0	0	0	0	0	0	0	0	0	0	0	0	0	0	0	0	0	0	0	0	0	0	0	0	0	0	0	0	0	0	0	0	0	0	0	0	0	0	0	0	0	0	0	0	0	0	0	0	0
d__Eukaryota;p__Streptophyta;c__Magnoliopsida;o__Caryophyllales;f__Chenopodiaceae;g__Oxybasis;s__Oxybasisglauca	0	0	0	0	0	0	0	0	0	0	0	0	0	0	0	0	0	0	0	0	0	0	0	0	0	0	0	0	0	0	0	0	0	0	0	0	0	0	0	0	0	0	0	0	0	0	0	0	0
d__Eukaryota;p__Streptophyta;c__Magnoliopsida;o__Lamiales;f__Lamiaceae;g__Vitex;s__Vitexnegundo	0	0	0	0	0	0	0	0	0	0	0	0	0	0	0	0	0	0	0	0	0	0	0	0	0	0	0	0	0	0	0	0	0	0	0	0	0	0	0	0	0	0	0	0	0	0	0	0	0
d__Eukaryota;p__Streptophyta;c__Magnoliopsida;o__Malvales;f__Malvaceae;g__Abutilon;s__Abutilontheophrasti	0	0	0	0	0	0	0	0	0	0	0	0	0	0	0	0	0	0	0	0	0	0	0	0	0	0	0	0	0	0	0	0	0	0	0	0	0	0	0	0	0	0	0	0	0	0	0	0	0
d__Eukaryota;p__Streptophyta;c__Magnoliopsida;o__Caryophyllales;f__Caryophyllaceae;g__Myosoton;s__Myosotonaquaticum	0	1	0	0	0	0	0	0	0	0	0	0	0	0	0	0	155	0	0	0	0	0	1	0	0	0	0	0	1	0	22	0	0	30	2	20	2	1	0	0	0	0	0	0	0	0	0	0	0
d__Eukaryota;p__Streptophyta;c__Magnoliopsida;o__Asterales;f__Asteraceae;g__Coreopsis;s__Coreopsistinctoria	0	0	0	0	0	0	0	0	0	0	0	0	0	0	0	0	0	0	0	0	0	0	0	0	0	0	0	0	0	0	0	0	0	0	0	0	0	0	0	0	0	0	0	0	0	0	0	0	0
d__Eukaryota;p__Streptophyta;c__Magnoliopsida;o__Malvales;f__Malvaceae;g__Theobroma;s__Theobromamicrocarpum	0	0	0	0	0	0	0	0	0	0	0	0	0	0	0	0	0	0	0	0	0	0	0	0	0	0	0	0	0	0	0	0	0	0	0	0	0	0	0	0	0	0	0	0	0	0	0	0	0
d__Eukaryota;p__Streptophyta;c__Magnoliopsida;o__Brassicales;f__Brassicaceae;g__Rorippa;s__Rorippapalustris	0	0	0	0	0	0	0	0	0	0	0	0	0	0	0	0	0	0	0	0	0	0	0	0	0	0	0	0	0	0	0	0	0	0	0	0	0	0	0	0	0	0	0	0	0	0	0	0	0
d__Eukaryota;p__Streptophyta;c__Magnoliopsida;o__Myrtales;f__Lythraceae;g__Lagerstroemia;s__Lagerstroemiaindica	0	0	0	0	0	0	0	0	0	0	0	0	0	0	0	0	0	0	0	0	0	0	0	0	0	0	0	0	0	0	0	0	0	0	0	0	0	0	0	0	0	0	0	0	0	0	0	0	0
d__Eukaryota;p__Streptophyta;c__Magnoliopsida;o__Dipsacales;f__Adoxaceae;g__Sambucus;s__Sambucuswilliamsii	0	0	0	0	0	0	0	0	0	0	0	0	0	0	0	0	0	0	0	0	0	0	0	0	0	0	0	0	0	0	0	0	0	0	0	0	0	0	0	0	0	0	0	0	0	0	0	0	0
d__Eukaryota;p__Streptophyta;c__Magnoliopsida;o__Caryophyllales;f__Polygonaceae;g__Polygonum;s__Polygonumaviculare	0	0	0	0	0	0	0	0	0	0	0	0	0	0	0	0	0	0	0	0	0	0	0	0	0	0	0	0	0	0	0	0	0	0	0	0	0	0	0	0	0	0	0	0	0	0	0	0	0
d__Eukaryota;p__Streptophyta;c__Pinopsida;o__Pinales;f__Pinaceae;g__Cedrus;s__Cedrusdeodara	0	0	0	0	0	0	0	0	0	0	0	0	0	0	0	0	0	0	0	0	0	0	0	0	0	0	0	0	0	0	0	0	0	0	0	0	0	0	0	0	0	0	0	0	0	0	0	0	0
d__Eukaryota;p__Streptophyta;c__Magnoliopsida;o__Fagales;f__Fagaceae;g__Quercus;s__Quercuspoilanei	0	0	0	0	0	0	0	0	0	0	0	0	0	0	0	0	0	0	0	0	0	0	0	0	0	0	0	0	0	0	0	0	0	0	0	0	0	0	0	0	0	0	0	0	0	0	0	0	0
d__Eukaryota;p__Streptophyta;c__Magnoliopsida;o__Poales;f__Poaceae;g__Cenchrus;s__Cenchrusamericanus	0	0	0	0	0	0	0	0	0	0	0	0	0	0	0	0	0	0	0	0	0	0	0	0	0	0	0	0	0	0	0	0	0	0	0	0	0	0	0	0	0	0	0	0	0	0	0	0	0
d__Eukaryota;p__Streptophyta;c__Pinopsida;o__Cupressales;f__Cupressaceae;g__Thuja;s__Thujasp.RM-2019	0	0	0	0	0	0	0	0	0	0	0	0	0	0	0	0	0	0	0	0	0	0	0	0	0	0	0	0	0	0	0	0	0	0	0	0	0	0	0	0	0	0	0	0	0	0	0	0	0
d__Eukaryota;p__Streptophyta;c__Magnoliopsida;o__Ericales;f__Balsaminaceae;g__Impatiens;s__Impatiensbalsamina	0	0	0	0	0	0	0	0	0	0	0	0	0	0	0	0	0	0	0	0	0	0	0	0	0	0	0	0	0	0	0	0	0	0	0	0	0	0	0	0	0	0	0	0	0	0	0	0	0
d__Eukaryota;p__Streptophyta;c__Magnoliopsida;o__Caryophyllales;f__Caryophyllaceae;g__Gypsophila;s__Gypsophilapaniculata	0	0	0	0	0	0	0	0	0	0	0	0	0	0	0	0	0	0	0	0	0	0	0	0	0	0	0	0	0	0	0	0	0	0	0	0	0	0	0	0	0	0	0	0	0	0	0	0	0
d__Eukaryota;p__Streptophyta;c__Magnoliopsida;o__Asterales;f__Asteraceae;g__Ambrosia;s__Ambrosiasalsola	0	0	0	0	0	0	0	0	0	0	0	0	0	0	0	0	0	0	0	0	0	0	0	0	0	0	0	0	0	0	0	0	0	0	0	0	0	0	0	0	0	0	0	0	0	0	0	0	0
d__Eukaryota;p__Streptophyta;c__Magnoliopsida;o__Solanales;f__Convolvulaceae;g__Ipomoea;s__Ipomoeacynanchifolia	0	0	0	0	0	0	0	0	0	0	0	0	0	0	0	0	0	0	0	0	0	0	0	0	0	0	0	0	0	0	0	0	0	0	0	0	2	0	0	0	0	0	0	0	0	0	0	0	0
d__Eukaryota;p__Streptophyta;c__Magnoliopsida;o__Asterales;f__Asteraceae;g__Erigeron;s__Erigeronannuus	0	0	0	0	0	0	0	0	0	0	50	0	0	0	0	0	0	0	0	0	0	0	0	0	0	0	0	0	0	0	0	0	0	0	0	0	0	0	0	0	0	0	0	0	0	0	0	0	0
d__Eukaryota;p__Streptophyta;c__Magnoliopsida;o__Asterales;f__Asteraceae;g__Klasea;s__Klasealeptoclada	0	0	0	0	0	0	0	0	0	0	0	0	0	0	0	0	0	0	0	0	0	0	0	0	0	0	0	0	0	0	0	0	0	0	0	0	0	0	0	0	0	0	0	0	0	0	0	0	0
d__Eukaryota;p__Streptophyta;c__Magnoliopsida;o__Rosales;f__Elaeagnaceae;g__Hippophae;s__Hippophaerhamnoides	0	0	0	0	0	0	0	0	0	0	0	0	0	0	0	0	0	0	0	0	0	0	0	0	0	0	0	0	0	0	0	0	0	0	0	0	0	0	0	0	0	0	0	0	0	0	0	0	0
d__Eukaryota;p__Streptophyta;c__Magnoliopsida;o__Ranunculales;f__Ranunculaceae;g__Ranunculus;s__Ranunculusnipponicus	0	0	0	0	0	0	0	0	0	0	0	0	0	0	0	0	0	0	0	0	0	0	200	149	3	0	0	0	0	0	0	0	0	0	0	19	0	0	0	0	0	0	0	0	0	11	0	0	0
d__Eukaryota;p__Streptophyta;c__Magnoliopsida;o__Brassicales;f__Brassicaceae;g__Descurainia;s__Descurainiacalifornica	0	0	0	0	0	0	0	0	0	0	0	0	0	0	0	0	0	0	0	0	0	0	0	0	0	0	0	0	0	0	0	0	0	0	0	0	0	0	0	0	0	0	0	0	0	0	0	0	0
d__Eukaryota;p__Streptophyta;c__Pinopsida;o__Pinales;f__Pinaceae;g__Pinus;s__Pinuspumila	0	0	0	0	0	0	0	0	0	0	0	0	0	0	0	0	0	0	0	0	0	0	0	0	0	0	0	0	0	0	0	0	0	0	0	0	0	0	0	0	0	0	0	0	0	0	0	0	0
d__Eukaryota;p__Streptophyta;c__Magnoliopsida;o__Ranunculales;f__Papaveraceae;g__Papaver;s__Papaverradicatum	0	0	0	0	0	0	0	0	0	0	0	0	0	0	0	0	0	0	0	0	0	0	0	0	0	0	0	0	0	0	0	0	0	0	0	0	0	0	0	0	0	0	0	0	0	0	0	0	0
d__Eukaryota;p__Streptophyta;c__Magnoliopsida;o__Apiales;f__Pittosporaceae;g__Pittosporum;s__Pittosporumtruncatum	0	0	0	0	0	0	0	0	0	0	0	0	0	0	0	0	0	0	0	0	0	0	0	0	0	1	0	0	0	0	0	0	0	0	0	0	0	0	0	0	0	0	0	0	0	0	0	0	0
d__Eukaryota;p__Streptophyta;c__Magnoliopsida;o__Sapindales;f__Sapindaceae;g__Koelreuteria;s__Koelreuteriapaniculata	0	0	0	0	0	0	0	0	0	0	0	0	0	0	0	0	0	0	0	0	0	0	0	0	0	0	0	0	0	0	0	0	0	0	0	0	0	0	0	0	0	0	0	0	0	0	0	0	0
d__Eukaryota;p__Streptophyta;c__Magnoliopsida;o__Fabales;f__Fabaceae;g__Vicia;s__Viciafaba	0	0	0	0	0	0	0	0	0	0	0	0	0	0	0	0	0	0	0	0	0	0	0	0	0	0	0	0	0	0	0	0	0	0	0	0	0	0	0	0	0	0	0	0	0	0	0	0	0
d__Eukaryota;p__Streptophyta;c__Magnoliopsida;o__Poales;f__Cyperaceae;g__Schoenoplectus;s__Schoenoplectuslacustris	0	0	0	0	0	0	0	0	0	0	0	0	0	0	0	0	0	0	0	0	0	0	0	0	0	0	0	0	0	0	0	0	0	0	0	0	0	0	0	0	0	0	0	0	0	0	0	0	0
d__Eukaryota;p__Streptophyta;c__Magnoliopsida;o__Rosales;f__Rosaceae;g__Drymocallis;s__Drymocallisfissa	0	0	0	0	0	0	0	0	0	0	0	0	0	0	0	0	0	0	0	0	0	0	0	0	0	0	0	0	0	0	0	0	0	0	0	0	0	0	0	0	0	0	0	0	0	0	0	0	0
d__Eukaryota;p__Streptophyta;c__Magnoliopsida;o__Fabales;f__Fabaceae;g__Vicia;s__Viciacassubica	0	0	0	0	0	0	0	0	0	0	0	0	0	0	0	0	0	0	0	0	0	0	0	0	0	0	0	0	0	0	0	0	0	0	0	0	0	0	0	0	0	0	0	0	0	0	0	0	0
d__Eukaryota;p__Streptophyta;c__Magnoliopsida;o__Lamiales;f__Oleaceae;g__Ligustrum;s__Ligustrumobtusifolium	0	0	0	0	0	0	0	0	0	0	0	0	0	0	0	0	0	0	0	0	0	0	0	0	0	0	0	0	0	0	0	0	0	0	0	0	0	0	0	0	0	0	0	0	0	0	0	0	0
d__Eukaryota;p__Streptophyta;c__Magnoliopsida;o__Saxifragales;f__Crassulaceae;g__Hylotelephium;s__Hylotelephiumerythrostictum	0	0	0	0	0	0	0	0	0	0	0	0	0	0	0	0	0	0	0	0	0	0	0	0	0	0	0	0	0	0	0	0	0	0	0	0	0	0	0	0	0	0	0	0	0	0	0	0	0
d__Eukaryota;p__Streptophyta;c__Magnoliopsida;o__Fabales;f__Fabaceae;g__Vicia;s__Viciaamurensis	0	0	0	0	0	0	0	0	0	0	0	0	0	0	0	0	0	0	0	0	0	0	0	0	0	0	0	0	0	0	0	0	0	0	0	0	0	0	0	0	0	0	0	0	0	0	0	0	0
d__Eukaryota;p__Streptophyta;c__Magnoliopsida;o__Brassicales;f__Brassicaceae;g__Streptanthus;s__Streptanthusfarnsworthianus	60	2	1	0	1	0	0	0	1	0	0	0	0	0	0	0	0	0	0	0	0	0	4	0	0	0	0	0	0	0	0	72	0	0	1	0	1	0	0	159	1	0	0	0	0	0	0	0	0
d__Eukaryota;p__Streptophyta;c__Magnoliopsida;o__Lamiales;f__Plantaginaceae;g__Veronica;s__Veronicaanagallis-aquatica	0	0	0	0	0	0	0	0	0	0	0	0	0	0	0	0	0	0	0	0	0	0	0	0	0	0	0	0	0	0	0	0	0	0	0	0	0	0	0	0	0	0	0	0	0	0	0	0	0
d__Eukaryota;p__Streptophyta;c__Pinopsida;o__Cupressales;f__Cupressaceae;g__Juniperus;s__Juniperuschinensis	0	0	0	0	0	0	0	0	0	0	0	0	0	0	0	0	0	0	0	0	0	0	0	0	0	0	0	0	0	0	0	0	0	0	0	0	0	0	0	0	0	0	0	0	0	0	0	0	0
d__Eukaryota;p__Streptophyta;c__Magnoliopsida;o__Rosales;f__Rosaceae;g__Rosa;s__Rosarugosa	0	0	0	0	0	0	0	0	0	0	0	0	0	0	0	0	2	0	0	0	0	0	0	0	0	0	0	0	0	0	0	0	0	0	0	0	0	0	0	0	0	0	0	0	0	0	0	0	0
d__Eukaryota;p__Streptophyta;c__Magnoliopsida;o__Rosales;f__Rosaceae;g__Cliffortia;s__Cliffortiaverrucosa	0	0	0	0	0	0	0	0	0	0	0	0	0	0	0	0	0	0	0	0	0	0	0	0	0	0	0	0	0	0	0	0	0	0	0	0	0	0	0	0	0	0	0	0	0	0	0	0	0
d__Eukaryota;p__Streptophyta;c__Magnoliopsida;o__Poales;f__Poaceae;g__Spodiopogon;s__Spodiopogonsibiricus	0	0	0	0	0	0	0	0	0	0	0	0	0	0	0	0	0	0	0	0	0	0	0	0	0	0	0	0	0	0	0	0	0	0	0	0	0	0	0	0	0	0	0	0	0	0	0	0	0
d__Eukaryota;p__Streptophyta;c__Magnoliopsida;o__Asterales;f__Asteraceae;g__Cichorieaesp.ZHW-2021;s__Cichorieaesp.ZHW-2021	0	0	0	0	0	0	0	0	0	0	0	0	0	0	0	0	0	0	0	0	0	0	0	0	0	0	0	0	0	0	0	0	0	0	0	0	0	0	0	0	0	0	0	0	0	0	0	0	0
d__Eukaryota;p__Streptophyta;c__Magnoliopsida;o__Cucurbitales;f__Cucurbitaceae;g__Cucumis;s__Cucumismelo	0	0	0	0	0	0	0	0	0	0	0	0	0	0	0	0	0	0	0	0	0	0	0	0	0	0	0	0	0	0	0	0	0	0	0	0	0	0	0	0	0	0	0	0	0	0	0	0	0
d__Eukaryota;p__Streptophyta;c__Magnoliopsida;o__Myrtales;f__Lythraceae;g__Lagerstroemia;s__Lagerstroemiasubcostata	0	0	0	0	0	0	0	0	0	0	0	0	0	0	0	0	0	0	0	0	0	0	0	0	0	0	0	0	0	0	0	0	0	0	0	0	0	0	0	0	0	0	0	0	0	0	0	0	0
d__Eukaryota;p__Streptophyta;c__Magnoliopsida;o__Lamiales;f__Plantaginaceae;g__Veronica;s__Veronicacatenata	0	0	0	0	0	0	0	0	0	0	0	0	0	0	0	0	0	0	0	0	0	0	0	0	0	0	0	0	0	0	0	0	0	0	0	0	0	0	0	0	0	0	0	0	0	0	0	0	0
d__Eukaryota;p__Streptophyta;c__Magnoliopsida;o__Asterales;f__Asteraceae;g__Erigeron;s__Erigeroncanadensis	0	0	0	0	0	0	0	0	0	0	0	0	0	0	0	0	0	0	0	0	0	0	0	0	0	0	0	0	0	0	0	0	0	0	0	0	0	0	0	0	0	0	0	0	0	0	0	0	0
d__Eukaryota;p__Streptophyta;c__Magnoliopsida;o__Malpighiales;f__Salicaceae;g__Populus;s__Populusnigra	0	40	0	0	0	0	0	0	0	0	0	0	0	0	0	0	0	0	0	0	0	0	0	0	0	0	0	0	0	0	0	0	0	0	0	0	0	0	0	0	0	0	0	0	0	0	0	0	0
d__Eukaryota;p__Streptophyta;c__Magnoliopsida;o__Fabales;f__Fabaceae;g__Vicia;s__Viciasativa	0	0	0	0	0	0	0	0	0	0	0	0	0	0	0	0	0	0	0	0	0	0	0	0	0	0	0	0	0	0	0	0	0	0	0	0	0	0	0	0	0	0	0	0	0	0	0	0	297
d__Eukaryota;p__Streptophyta;c__Magnoliopsida;o__Fabales;f__Fabaceae;g__Amorpha;s__Amorphacalifornica	0	0	0	0	0	0	0	0	0	0	0	0	0	0	0	0	0	0	0	0	0	0	0	0	0	0	0	0	0	0	0	0	0	0	0	0	0	0	0	0	0	0	0	0	0	0	0	0	0
d__Eukaryota;p__Streptophyta;c__Magnoliopsida;o__Malvales;f__Malvaceae;g__Gossypium;s__Gossypiumklotzschianum	0	0	0	0	0	0	0	0	0	0	0	0	0	0	0	0	0	0	0	0	0	0	0	0	0	0	0	0	0	0	0	0	0	0	0	0	0	0	0	0	0	0	0	0	0	0	0	0	0
d__Eukaryota;p__Streptophyta;c__Magnoliopsida;o__Lamiales;f__Lamiaceae;g__Scutellaria;s__Scutellariabaicalensis	0	0	0	0	0	0	0	0	0	0	0	0	0	0	0	0	0	0	0	0	0	0	0	0	0	0	0	0	0	0	0	0	0	0	0	0	0	0	0	0	0	0	0	0	0	0	0	0	0
d__Eukaryota;p__Streptophyta;c__Magnoliopsida;o__Asterales;f__Asteraceae;g__Saussurea;s__Saussurealyrata	0	0	0	0	0	0	0	0	0	0	0	0	0	0	0	0	0	0	0	0	0	0	0	0	0	0	0	0	0	0	0	0	0	0	0	0	0	0	0	0	0	0	0	0	0	0	0	0	0
d__Eukaryota;p__Streptophyta;c__Magnoliopsida;o__Saxifragales;f__Crassulaceae;g__Orostachys;s__Orostachyschanetii	0	0	0	0	0	0	0	0	0	0	0	0	0	0	0	0	0	0	0	0	0	0	0	0	0	0	0	0	0	0	0	0	0	0	0	0	0	0	0	0	0	0	0	0	0	0	0	0	0
d__Eukaryota;p__Streptophyta;c__Magnoliopsida;o__Lamiales;f__Lamiaceae;g__Salvia;s__Salviasyriaca	0	0	0	0	0	0	0	0	0	0	0	0	0	0	0	0	0	0	0	0	0	0	0	0	0	0	0	0	0	0	0	0	0	0	0	0	0	0	0	0	0	0	0	0	0	0	0	0	0
d__Eukaryota;p__Streptophyta;c__Magnoliopsida;o__Sapindales;f__Rutaceae;g__Zanthoxylum;s__Zanthoxylumcoreanum	0	0	0	0	0	0	0	0	0	0	0	0	0	0	0	0	0	0	0	0	0	0	0	0	0	0	0	0	0	0	0	0	0	0	0	0	0	0	0	0	0	0	0	0	0	0	0	0	0
d__Eukaryota;p__Streptophyta;c__Magnoliopsida;o__Asterales;f__Asteraceae;g__Tagetes;s__Tagetestenuifolia	0	0	0	0	0	0	0	0	0	0	0	0	0	0	0	0	0	0	0	0	0	0	0	0	0	0	0	0	0	0	0	0	0	0	0	0	0	0	0	0	0	0	0	0	0	0	0	0	0
d__Eukaryota;p__Streptophyta;c__Pinopsida;o__Pinales;f__Pinaceae;g__Pinus;s__Pinusluchuensis	0	0	0	0	0	0	0	0	0	0	0	0	0	0	0	0	0	0	0	0	0	0	0	0	0	0	0	0	0	0	0	0	0	1	0	0	0	0	0	0	0	0	0	0	0	0	0	0	0
d__Eukaryota;p__Streptophyta;c__Magnoliopsida;o__Asparagales;f__Amaryllidaceae;g__Allium;s__Alliumramosum	0	0	0	0	0	0	0	0	0	0	0	0	0	0	0	0	0	0	0	0	0	0	0	0	0	0	0	0	0	0	0	0	0	0	0	0	0	0	0	0	0	0	0	0	0	0	0	0	0
d__Eukaryota;p__Streptophyta;c__Magnoliopsida;o__Asterales;f__Asteraceae;g__Ajania;s__Ajaniapotaninii	0	0	0	0	0	0	0	0	0	0	0	0	0	0	0	0	0	0	0	0	0	0	0	0	0	0	0	0	0	0	0	0	0	0	0	0	0	0	0	0	0	0	0	0	0	0	0	0	0
d__Eukaryota;p__Streptophyta;c__Magnoliopsida;o__Ranunculales;f__Papaveraceae;g__Papaver;s__Papaverrhoeas	0	0	0	0	0	0	0	0	0	0	0	0	0	0	0	0	0	0	0	0	0	0	0	0	0	0	0	0	0	0	0	0	0	0	0	0	0	0	0	0	0	0	0	0	0	0	0	0	0
d__Eukaryota;p__Streptophyta;c__Magnoliopsida;o__Asterales;f__Asteraceae;g__Chrysanthemum;s__Chrysanthemumindicum	0	0	0	0	0	0	0	0	0	0	0	0	0	0	0	0	0	0	0	0	0	0	0	0	0	0	0	0	0	0	0	0	0	0	0	0	0	0	0	0	0	0	0	0	0	0	0	0	0
d__Eukaryota;p__Streptophyta;c__Magnoliopsida;o__Asterales;f__Asteraceae;g__Sonchus;s__Sonchusasper	0	0	0	0	0	0	0	0	0	2	0	0	0	5	0	0	0	0	0	0	0	0	0	0	0	0	0	0	0	6	0	0	46	0	0	0	0	0	0	1	0	0	0	0	0	0	0	0	0
d__Eukaryota;p__Streptophyta;c__Magnoliopsida;o__Saxifragales;f__Crassulaceae;g__Rhodiola;s__Rhodiolakirilowii	0	0	0	0	0	0	0	0	0	0	0	0	0	0	0	0	0	0	0	0	0	0	0	0	0	0	0	0	0	0	0	0	0	0	0	0	0	0	0	0	0	0	0	0	0	0	0	0	0
d__Eukaryota;p__Streptophyta;c__Magnoliopsida;o__Rosales;f__Rosaceae;g__Potentilla;s__Potentillagrammopetala	0	0	0	0	0	0	0	0	0	0	0	0	0	0	0	0	0	0	0	0	0	0	0	0	0	0	0	0	0	0	0	0	0	0	0	0	0	0	0	0	0	0	0	0	0	0	0	0	0
d__Eukaryota;p__Streptophyta;c__Magnoliopsida;o__Rosales;f__Rosaceae;g__Malus;s__Malusdomestica	0	0	0	0	0	0	0	0	0	0	0	0	0	0	0	0	0	0	0	0	0	0	0	0	0	0	0	0	0	0	0	0	0	0	0	0	0	0	0	0	0	0	0	0	0	0	0	0	0
d__Eukaryota;p__Streptophyta;c__Magnoliopsida;o__Rosales;f__Rosaceae;g__Rosa;s__Rosacanina	0	0	0	0	0	0	0	0	0	0	0	0	0	0	0	0	1	0	0	0	0	0	0	0	0	0	0	0	0	0	0	0	0	0	0	0	0	0	0	0	0	0	0	0	0	0	0	0	0
d__Eukaryota;p__Streptophyta;c__Magnoliopsida;o__Asterales;f__Asteraceae;g__Inula;s__Inulasp.cdT17	0	0	0	0	0	0	0	0	0	0	0	0	0	0	0	0	0	0	0	0	0	0	0	0	0	0	0	0	0	0	0	0	0	0	0	0	0	0	0	0	0	0	0	0	0	0	0	0	0
d__Eukaryota;p__Streptophyta;c__Magnoliopsida;o__Fagales;f__Betulaceae;g__Betula;s__Betulapendula	0	0	0	0	0	0	0	0	0	0	0	0	0	0	0	0	0	0	0	0	0	0	0	0	0	0	0	0	0	0	0	0	0	0	0	0	0	0	0	0	0	0	0	0	0	0	0	0	0
d__Eukaryota;p__Streptophyta;c__Magnoliopsida;o__Malpighiales;f__Salicaceae;g__Xylosma;s__Xylosmacongesta	0	0	0	0	0	0	0	0	0	0	0	0	0	0	0	0	0	0	0	0	0	0	0	0	0	0	0	0	0	0	0	0	0	0	0	0	0	0	0	0	0	0	0	0	0	0	0	0	0
d__Eukaryota;p__Streptophyta;c__Magnoliopsida;o__Ranunculales;f__Ranunculaceae;g__Ranunculus;s__Ranunculuscrenatus	0	0	0	0	0	0	0	0	0	0	0	0	1	0	0	0	0	14	0	0	0	0	0	0	0	0	0	0	0	24	0	0	0	0	18	0	0	0	17	0	0	0	0	0	0	0	0	0	0
d__Eukaryota;p__Streptophyta;c__Magnoliopsida;o__Fabales;f__Fabaceae;g__Amorpha;s__Amorphafruticosa	0	0	0	0	0	0	0	0	0	0	0	0	0	0	0	0	0	0	0	0	0	0	0	0	0	0	0	0	0	0	0	0	0	0	0	0	0	0	0	0	0	0	0	0	0	0	0	0	0
d__Eukaryota;p__Streptophyta;c__Magnoliopsida;o__Poales;f__Cyperaceae;g__Fimbristylis;s__Fimbristylisquinquangularis	0	0	0	0	0	0	0	0	0	0	0	0	0	0	0	0	0	0	0	0	0	0	0	0	0	0	0	0	0	0	0	0	0	0	0	0	0	0	0	0	0	0	0	0	0	0	0	0	0
d__Eukaryota;p__Streptophyta;c__Magnoliopsida;o__Ranunculales;f__Ranunculaceae;g__Ranunculus;s__Ranunculussilerifolius	0	2	1	0	14	1	0	2	35	0	0	0	84	0	18	0	0	14	0	0	0	0	0	0	0	0	0	0	0	0	0	0	0	0	0	0	0	0	0	0	0	0	0	0	0	0	0	0	0
d__Eukaryota;p__Streptophyta;c__Pinopsida;o__Pinales;f__Pinaceae;g__Pinus;s__Pinuscontorta	0	0	0	0	0	0	0	0	0	0	0	0	0	0	0	0	0	0	0	0	0	0	0	0	0	0	0	0	0	0	0	0	0	0	0	0	0	0	0	0	0	0	0	0	0	0	0	0	0
d__Eukaryota;p__Streptophyta;c__Magnoliopsida;o__Poales;f__Poaceae;g__Lolium;s__Loliumarundinaceum	0	0	0	0	0	0	0	0	0	0	0	0	0	0	0	0	0	0	0	0	0	0	0	0	0	0	0	0	0	0	0	0	0	0	0	0	0	0	0	0	0	0	0	0	0	0	0	0	0
d__Eukaryota;p__Streptophyta;c__Magnoliopsida;o__Solanales;f__Solanaceae;g__Solanum;s__Solanumlyratum	0	0	0	0	0	0	0	0	0	0	0	0	0	0	0	0	0	0	0	0	0	0	0	0	0	0	0	0	0	0	0	0	0	0	0	0	0	0	0	0	0	0	0	0	0	0	0	0	0
d__Eukaryota;p__Streptophyta;c__Magnoliopsida;o__Sapindales;f__Rutaceae;g__Citrus;s__Citrussinensis	0	0	0	0	0	0	0	0	0	0	0	0	0	0	0	0	0	0	0	0	0	0	0	0	0	0	0	0	0	0	0	0	0	0	0	0	0	0	0	0	0	0	0	0	0	0	0	0	0
d__Eukaryota;p__Streptophyta;c__Magnoliopsida;o__Sapindales;f__Rutaceae;g__Citrus;s__Citrusmaxima	0	0	0	0	0	0	0	0	0	0	0	0	0	0	0	0	0	0	0	0	0	0	0	0	0	0	0	0	0	0	0	0	0	0	0	0	0	0	0	0	0	0	0	0	0	0	0	0	0
d__Eukaryota;p__Streptophyta;c__Magnoliopsida;o__Lamiales;f__Lamiaceae;g__Salvia;s__Salviaplebeia	0	0	0	0	0	0	0	0	0	0	0	0	0	0	0	0	0	0	0	0	0	0	0	0	0	0	0	0	0	0	0	0	0	0	0	0	0	0	0	0	0	0	0	0	0	0	0	0	0
d__Eukaryota;p__Streptophyta;c__Pinopsida;o__Cupressales;f__Cupressaceae;g__Juniperus;s__Juniperussabina	0	0	0	0	0	0	0	0	0	0	0	0	0	0	0	0	0	0	0	0	0	0	0	0	0	0	0	0	0	0	0	0	0	0	0	0	0	0	0	0	0	0	0	0	0	0	0	0	0
d__Eukaryota;p__Streptophyta;c__Magnoliopsida;o__Rosales;f__Rosaceae;g__Malus;s__Malussieversii	0	0	0	0	0	0	0	0	0	0	0	0	0	0	0	0	0	0	0	0	0	0	0	0	0	0	0	0	0	0	0	0	0	0	0	0	0	0	0	0	0	0	0	0	0	0	0	0	0
d__Eukaryota;p__Streptophyta;c__Magnoliopsida;o__Fabales;f__Fabaceae;g__Senna;s__Sennaalexandrina	0	0	0	0	0	0	0	0	0	0	0	0	0	0	0	0	0	0	0	0	0	0	0	0	0	0	0	0	0	0	0	0	0	0	0	0	0	0	0	0	0	0	0	0	0	0	0	0	0
d__Eukaryota;p__Streptophyta;c__Magnoliopsida;o__Poales;f__Poaceae;g__Triticum;s__Triticummonococcum	0	0	0	0	0	0	0	0	0	0	0	0	0	0	0	0	0	0	0	0	0	0	0	0	0	0	0	0	0	0	0	0	0	0	0	0	0	0	0	0	0	0	0	0	0	0	0	0	0
d__Eukaryota;p__Streptophyta;c__Magnoliopsida;o__Lamiales;f__Mazaceae;g__Mazus;s__Mazusspicatus	0	0	0	0	0	0	0	0	0	0	0	0	0	0	0	0	0	0	0	0	0	0	0	0	0	0	0	0	0	0	0	0	0	0	0	0	0	0	0	0	0	0	0	0	0	0	0	0	0
d__Eukaryota;p__Streptophyta;c__Magnoliopsida;o__Asterales;f__Asteraceae;g__Artemisia;s__Artemisiacapillaris	0	0	0	0	0	0	0	0	0	0	0	0	0	0	0	0	0	0	0	0	0	0	0	0	0	0	0	0	0	0	0	0	0	0	0	0	0	0	0	0	0	0	0	0	0	0	0	0	0
d__Eukaryota;p__Streptophyta;c__Magnoliopsida;o__Asterales;f__Asteraceae;g__Cirsium;s__Cirsiumvulgare	0	0	0	0	0	0	0	0	0	0	0	0	0	0	0	0	0	0	0	0	0	0	0	0	0	0	0	0	0	0	0	0	0	0	0	0	0	0	0	0	0	0	0	0	0	0	0	0	0
d__Eukaryota;p__Streptophyta;c__Magnoliopsida;o__Caryophyllales;f__Chenopodiaceae;g__Suaeda;s__Suaedalinifolia	0	190	0	0	0	0	0	0	0	0	0	0	0	0	0	0	0	0	0	0	0	0	0	0	0	0	0	0	0	0	0	0	0	0	0	0	0	0	0	0	0	0	0	0	0	0	0	0	0
d__Eukaryota;p__Streptophyta;c__Magnoliopsida;o__Malpighiales;f__Podostemaceae;g__Weddellina;s__Weddellinasp.NTT-2019	0	0	0	0	0	0	0	0	0	0	0	0	0	0	0	0	0	0	0	0	0	0	0	0	0	0	0	0	0	0	0	0	0	0	0	0	0	0	0	0	0	0	0	0	0	0	0	0	0
d__Eukaryota;p__Streptophyta;c__Magnoliopsida;o__Fagales;f__Betulaceae;g__Betula;s__Betulanana	0	0	0	0	0	0	0	0	0	0	0	0	0	0	0	0	0	0	0	0	0	0	0	0	0	0	0	0	0	0	0	0	0	0	0	0	0	0	0	0	0	0	0	0	0	0	0	0	0
d__Eukaryota;p__Streptophyta;c__Magnoliopsida;o__Sapindales;f__Rutaceae;g__Citrus;s__Citrusleiocarpa	0	4	0	0	0	0	0	0	0	0	0	0	14	9	0	0	0	0	0	0	0	0	0	0	0	0	0	0	0	0	0	0	0	0	0	0	0	0	0	3	0	0	0	0	0	0	0	0	0
d__Eukaryota;p__Streptophyta;c__Magnoliopsida;o__Lamiales;f__Verbenaceae;g__Glandularia;s__Glandulariamendocina	0	0	0	0	0	0	0	0	0	0	0	0	0	14	0	16	0	0	9	131	0	0	0	0	0	0	0	0	0	0	0	0	0	0	0	0	0	0	0	0	0	0	0	0	0	0	0	0	0
d__Eukaryota;p__Streptophyta;c__Magnoliopsida;o__Poales;f__Poaceae;g__Pratochloa;s__Pratochloawalteri	0	0	0	0	0	0	0	0	0	0	0	0	0	0	0	0	0	0	0	0	0	0	0	0	0	0	0	0	0	0	0	0	0	0	0	0	0	0	0	0	0	0	0	0	0	0	0	0	0
d__Eukaryota;p__Streptophyta;c__Magnoliopsida;o__Caryophyllales;f__Polygonaceae;g__Persicaria;s__Persicariaperfoliata	0	0	0	0	0	0	0	0	0	0	0	0	0	0	0	0	0	0	0	0	0	0	0	0	0	0	0	0	0	0	0	0	0	0	0	0	0	0	0	0	0	0	0	0	0	0	0	0	0
d__Eukaryota;p__Streptophyta;c__Magnoliopsida;o__Sapindales;f__Rutaceae;g__Zanthoxylum;s__Zanthoxylumbungeanum	0	0	0	0	0	0	0	0	0	0	0	0	0	0	0	0	0	0	0	0	0	0	0	0	0	0	0	0	0	0	0	0	0	0	0	0	0	0	0	0	0	0	0	0	0	0	0	0	0
d__Eukaryota;p__Streptophyta;c__Magnoliopsida;o__Asterales;f__Asteraceae;g__Ambrosia;s__Ambrosiabidentata	0	0	0	0	0	0	0	0	0	0	0	0	0	0	0	0	0	0	0	0	0	0	0	0	0	0	0	0	0	0	0	0	0	0	0	0	0	0	0	0	0	0	0	0	0	0	0	0	0
d__Eukaryota;p__Streptophyta;c__Magnoliopsida;o__Rosales;f__Rosaceae;g__Prunus;s__Prunusarmeniaca	0	0	0	0	0	0	0	0	0	0	0	0	0	0	0	0	0	0	0	0	0	0	0	0	0	0	0	0	0	0	0	0	0	0	0	0	0	0	0	0	0	0	0	0	0	0	0	0	0
d__Eukaryota;p__Streptophyta;c__Magnoliopsida;o__Asterales;f__Asteraceae;g__Blumea;s__Blumeabalsamifera	0	0	0	0	0	0	0	0	0	0	0	0	0	0	0	0	0	0	0	0	0	0	0	0	0	0	0	0	0	0	0	0	0	0	0	0	0	0	0	0	0	0	0	0	0	0	0	0	0
d__Eukaryota;p__Streptophyta;c__Magnoliopsida;o__Asterales;f__Asteraceae;g__Erigeron;s__Erigeronphiladelphicus	0	0	0	0	0	0	0	0	0	0	1	0	0	0	0	0	0	0	0	0	0	0	0	0	0	0	0	0	0	0	0	0	0	0	0	0	0	0	0	0	0	0	0	0	0	0	0	0	0
d__Eukaryota;p__Streptophyta;c__Magnoliopsida;o__Ericales;f__Primulaceae;g__Lysimachia;s__Lysimachiacandida	0	3	1	1	6	2	0	0	14	4	0	0	15	0	0	0	0	41	0	5	0	0	0	0	0	0	0	0	0	0	0	0	0	0	0	0	0	0	0	0	0	0	0	0	0	0	0	0	0
d__Eukaryota;p__Streptophyta;c__Polypodiopsida;o__Polypodiales;f__Pteridaceae;g__Pteris;s__Pteriscretica	0	0	0	0	0	0	0	0	0	0	0	0	0	0	0	0	0	0	0	0	0	0	0	0	0	0	0	0	0	0	0	0	0	0	0	0	0	0	0	0	0	0	0	0	0	0	0	0	0
d__Eukaryota;p__Streptophyta;c__Magnoliopsida;o__Malpighiales;f__Passifloraceae;g__Passiflora;s__Passifloraalata	0	0	0	0	0	0	0	0	0	0	0	0	0	0	0	0	0	0	0	0	0	0	0	0	0	0	0	0	0	0	0	0	0	0	0	0	0	0	0	0	0	0	0	0	0	0	0	0	0
d__Eukaryota;p__Streptophyta;c__Magnoliopsida;o__Asterales;f__Asteraceae;g__Crepidiastrum;s__Crepidiastrumlanceolatum	0	0	0	0	0	0	0	0	0	0	0	0	0	0	0	0	0	0	0	0	0	0	0	0	0	0	0	0	0	0	0	0	0	0	0	0	0	0	0	0	0	0	0	0	0	0	0	0	0
d__Eukaryota;p__Streptophyta;c__Magnoliopsida;o__Cucurbitales;f__Cucurbitaceae;g__Cucurbita;s__Cucurbitasp.MIB:SASS:0086	0	0	0	0	0	0	0	0	0	0	0	0	0	0	0	0	0	0	0	0	0	0	0	0	0	0	0	0	0	0	0	0	0	0	0	0	0	0	0	0	0	0	0	0	0	0	0	0	0
d__Eukaryota;p__Streptophyta;c__Magnoliopsida;o__Solanales;f__Convolvulaceae;g__Ipomoea;s__Ipomoeabatatas	0	0	0	0	0	0	0	0	0	0	0	0	0	0	0	0	0	0	0	0	0	0	0	0	0	0	0	0	0	0	0	0	0	0	0	0	0	0	0	0	0	0	0	0	0	0	0	0	0
d__Eukaryota;p__Streptophyta;c__Magnoliopsida;o__Rosales;f__Rosaceae;g__Sibbaldianthe;s__Sibbaldianthebifurca	0	0	0	0	0	0	0	0	0	0	0	0	0	0	0	0	0	0	0	0	0	0	0	0	0	0	0	0	0	0	0	0	0	0	0	0	0	0	0	0	0	0	0	0	0	0	0	0	0
d__Eukaryota;p__Streptophyta;c__Magnoliopsida;o__Cucurbitales;f__Cucurbitaceae;g__Momordica;s__Momordicacharantia	0	0	0	0	0	0	0	0	0	0	0	0	0	0	0	0	0	0	0	0	0	0	0	0	0	0	0	0	0	0	0	0	0	0	0	0	0	0	0	0	0	0	0	0	0	0	0	0	0
d__Eukaryota;p__Streptophyta;c__Magnoliopsida;o__Ericales;f__Theaceae;g__Camellia;s__Camelliareticulata	0	0	0	0	0	0	0	0	0	0	0	0	0	0	0	0	0	0	0	0	0	0	0	0	0	0	0	0	0	0	0	0	0	0	0	0	0	0	0	0	0	0	0	0	0	0	0	0	0
d__Eukaryota;p__Streptophyta;c__Magnoliopsida;o__Lamiales;f__Mazaceae;g__Mazus;s__Mazusgracilis	0	0	0	0	0	0	0	0	0	0	0	0	0	0	0	0	0	0	0	0	0	0	0	0	0	0	0	0	0	0	0	0	0	0	0	0	0	0	0	0	0	0	0	0	0	0	0	0	0
d__Eukaryota;p__Streptophyta;c__Magnoliopsida;o__Caryophyllales;f__Caryophyllaceae;g__Silene;s__Silenestenophylla	0	0	0	0	0	0	0	0	0	0	0	0	0	0	0	0	0	0	0	0	0	0	0	0	0	0	0	0	0	0	0	0	0	0	0	0	0	0	0	0	0	0	0	0	0	0	0	0	0
d__Eukaryota;p__Streptophyta;c__Magnoliopsida;o__Malvales;f__Malvaceae;g__Tilia;s__Tiliacordata	0	0	0	0	0	0	0	0	0	0	0	0	0	0	0	0	0	0	0	0	0	0	0	0	0	0	0	0	0	0	0	0	0	0	0	0	0	0	0	0	0	0	0	0	0	0	0	0	0
d__Eukaryota;p__Streptophyta;c__Magnoliopsida;o__Dioscoreales;f__Dioscoreaceae;g__Dioscorea;s__Dioscoreanipponica	0	0	0	0	0	0	0	0	0	0	0	0	0	0	0	0	0	0	0	0	0	0	0	0	0	0	0	0	0	0	0	0	0	0	0	0	0	0	0	0	0	0	0	0	0	0	0	0	0
d__Eukaryota;p__Streptophyta;c__Magnoliopsida;o__Poales;f__Poaceae;g__Chloris;s__Chlorisgayana	0	0	0	0	0	0	0	0	0	0	0	0	0	0	0	0	0	0	0	0	0	0	0	0	0	0	0	0	0	0	0	0	0	0	0	0	0	0	0	0	0	0	0	0	0	0	0	0	0
d__Eukaryota;p__Streptophyta;c__Magnoliopsida;o__Caryophyllales;f__Polygonaceae;g__Rumex;s__Rumexponticus	0	0	0	0	0	0	0	0	0	0	0	0	0	0	0	0	0	0	0	0	0	0	0	0	0	0	0	0	16	0	0	0	0	11	0	0	0	0	0	0	0	0	0	0	0	0	0	0	0
d__Eukaryota;p__Streptophyta;c__Magnoliopsida;o__Lamiales;f__Plantaginaceae;g__Veronica;s__Veronicamultifida	0	0	0	0	0	0	0	0	0	0	11	0	0	0	0	0	0	0	0	0	0	0	0	0	0	0	0	0	0	0	0	0	0	0	0	0	0	0	0	0	0	0	0	0	0	6	0	0	0
d__Eukaryota;p__Streptophyta;c__Magnoliopsida;o__Asterales;f__Asteraceae;g__Artemisia;s__Artemisiacalifornica	0	0	0	0	0	0	0	0	0	0	0	0	0	0	0	0	0	0	0	0	0	0	0	0	0	0	0	0	0	0	0	0	0	0	0	0	0	0	0	0	0	0	0	0	0	0	0	0	0
d__Eukaryota;p__Streptophyta;c__Magnoliopsida;o__Fabales;f__Fabaceae;g__Vigna;s__Vignaunguiculata	0	0	0	0	0	0	0	0	0	0	0	0	0	0	0	0	0	0	0	0	0	0	0	0	0	0	0	0	0	0	0	0	0	0	0	0	0	0	0	0	0	0	0	0	0	0	0	0	0
d__Eukaryota;p__Streptophyta;c__Magnoliopsida;o__Ranunculales;f__Ranunculaceae;g__Ranunculus;s__Ranunculustrigonus	0	11	12	11	0	5	0	8	3	0	0	1	0	0	1	0	0	6	0	0	0	0	0	0	0	0	0	0	0	0	0	0	0	0	0	0	0	0	0	3	0	0	0	0	0	0	0	0	0
d__Eukaryota;p__Streptophyta;c__Magnoliopsida;o__Caryophyllales;f__Caryophyllaceae;g__Stellaria;s__Stellariapallida	0	0	0	0	0	0	0	0	0	0	0	0	0	0	0	0	0	0	0	0	0	0	0	0	0	0	0	0	0	0	0	0	0	0	0	0	0	0	0	0	0	0	0	0	0	0	0	0	0
d__Eukaryota;p__Streptophyta;c__Magnoliopsida;o__Rosales;f__Moraceae;g__Broussonetia;s__Broussonetiakurzii	0	0	0	0	0	0	0	0	0	0	0	0	0	0	0	0	0	0	0	0	0	0	0	0	0	0	0	0	0	0	0	0	0	0	0	0	0	0	0	0	0	0	0	0	0	0	0	0	0
d__Eukaryota;p__Streptophyta;c__Magnoliopsida;o__Caryophyllales;f__Tamaricaceae;g__Tamarix;s__Tamarixaustromongolica	0	0	0	0	0	0	0	0	0	0	0	0	0	0	0	0	0	0	0	0	0	0	0	0	0	0	0	0	0	0	0	0	0	0	0	0	0	0	0	0	0	0	0	0	0	0	0	0	0
d__Eukaryota;p__Streptophyta;c__Magnoliopsida;o__Poales;f__Poaceae;g__Triticum;s__Triticumspelta	0	0	0	0	0	0	0	0	0	0	0	0	0	0	0	0	0	0	0	0	0	0	0	0	0	0	0	0	4	0	19	0	0	20	0	0	0	0	0	0	0	0	0	0	0	0	0	0	0
d__Eukaryota;p__Streptophyta;c__Magnoliopsida;o__Brassicales;f__Brassicaceae;g__Camelina;s__Camelinasativa	0	0	0	0	0	0	0	0	0	0	0	0	0	0	0	0	0	0	0	0	0	0	0	0	1	0	0	1	0	0	0	0	0	0	0	0	3	0	0	0	1	0	0	0	0	1	0	0	0
d__Eukaryota;p__Streptophyta;c__Magnoliopsida;o__Asterales;f__Asteraceae;g__Aster;s__Astertongolensis	0	0	0	0	0	0	0	0	0	0	0	0	0	0	0	0	0	0	0	0	0	0	0	0	0	0	0	0	0	0	0	0	0	0	0	0	0	0	0	0	0	0	0	0	0	0	0	0	0
d__Eukaryota;p__Streptophyta;c__Magnoliopsida;o__Poales;f__Poaceae;g__Alopecurus;s__Alopecurusgerardii	0	0	0	0	0	0	0	0	0	0	0	0	0	0	0	0	0	0	0	6	0	0	0	0	0	0	0	0	0	0	0	0	0	0	0	1	0	0	0	0	0	0	0	0	0	0	0	0	0
d__Eukaryota;p__Streptophyta;c__Magnoliopsida;o__Rosales;f__Cannabaceae;g__Trema;s__Tremaorientale	0	0	0	0	0	0	0	0	0	0	0	0	0	0	0	0	0	0	0	0	0	0	0	0	0	0	0	0	0	0	0	0	0	0	0	0	0	0	0	0	0	0	0	0	0	0	0	0	0
d__Eukaryota;p__Streptophyta;c__Magnoliopsida;o__Fagales;f__Fagaceae;g__Quercus;s__Quercusaliena	0	0	0	0	0	0	0	0	0	0	0	0	0	0	0	0	0	0	0	0	0	0	0	0	0	0	0	0	0	0	0	0	0	0	0	0	0	0	0	0	0	0	0	0	0	0	0	0	0
d__Eukaryota;p__Streptophyta;c__Magnoliopsida;o__Poales;f__Poaceae;g__Phragmites;s__Phragmitesaustralis	0	0	0	0	0	0	0	0	0	0	0	0	0	0	0	0	0	0	0	0	0	0	0	0	0	0	0	0	0	0	0	0	0	0	0	0	0	0	0	0	0	0	0	0	0	0	0	0	0
d__Eukaryota;p__Streptophyta;c__Magnoliopsida;o__Brassicales;f__Brassicaceae;g__Lepidium;s__Lepidiumapetalum	0	0	0	0	0	0	0	0	0	0	0	0	0	0	0	0	0	0	0	0	0	0	0	0	0	0	0	0	0	0	0	0	0	0	0	0	0	0	0	0	0	0	0	0	0	0	0	0	0
d__Eukaryota;p__Streptophyta;c__Magnoliopsida;o__Cucurbitales;f__Cucurbitaceae;g__Luffa;s__Luffaaegyptiaca	0	0	0	0	0	0	0	0	0	0	0	0	0	0	0	0	0	0	0	0	0	0	0	0	0	0	0	0	0	0	0	0	0	0	0	0	0	0	0	0	0	0	0	0	0	0	0	0	0
d__Eukaryota;p__Streptophyta;c__Magnoliopsida;o__Apiales;f__Apiaceae;g__Torilis;s__Torilisjaponica	0	0	0	0	0	0	0	0	0	0	0	0	0	0	0	0	0	0	0	0	0	0	0	0	0	0	0	0	0	0	0	0	0	0	0	0	0	0	0	0	0	0	0	0	0	0	0	0	0
d__Eukaryota;p__Streptophyta;c__Magnoliopsida;o__Malvales;f__Malvaceae;g__Theobroma;s__Theobromaspeciosum	0	0	0	0	0	0	0	0	0	0	0	0	0	0	0	0	0	0	0	0	0	0	0	0	0	0	0	0	0	0	0	0	0	0	0	0	0	0	0	0	0	0	0	0	0	0	0	0	0
d__Eukaryota;p__Streptophyta;c__Magnoliopsida;o__Rosales;f__Rosaceae;g__Crataegus;s__Crataegusmaximowiczii	0	0	0	0	0	0	0	0	0	0	0	0	0	0	0	0	0	0	0	0	0	0	0	0	0	0	0	0	0	0	0	0	0	0	0	0	0	0	0	0	0	0	0	0	0	0	0	0	0
d__Eukaryota;p__Streptophyta;c__Magnoliopsida;o__Lamiales;f__Verbenaceae;g__Glandularia;s__Glandulariaperuviana	0	0	0	0	39	0	0	0	0	0	0	0	0	0	4	1	0	0	7	0	54	0	0	0	0	0	0	0	0	0	0	0	0	0	0	0	0	0	0	0	0	0	0	0	0	0	0	0	0
d__Eukaryota;p__Streptophyta;c__Magnoliopsida;o__Rosales;f__Rosaceae;g__Potentilla;s__Potentillapensylvanica	0	0	0	0	0	0	0	0	0	0	0	0	0	0	0	0	0	0	0	0	0	0	0	0	0	0	0	0	0	0	0	0	0	0	0	0	0	0	0	0	0	0	0	0	0	0	0	0	0
d__Eukaryota;p__Streptophyta;c__Cycadopsida;o__Cycadales;f__Cycadaceae;g__Cycas;s__Cycasrevoluta	0	0	0	0	0	0	0	0	0	0	0	0	0	0	0	0	0	0	0	0	0	0	0	0	0	0	0	0	0	0	0	0	0	0	0	0	0	0	0	0	0	0	0	0	0	0	0	0	0
d__Eukaryota;p__Streptophyta;c__Magnoliopsida;o__Commelinales;f__Commelinaceae;g__Commelina;s__Commelinabenghalensis	0	0	0	0	0	0	0	0	0	0	0	0	0	0	0	0	0	0	0	0	0	0	0	0	0	0	0	0	0	0	0	0	0	0	0	0	0	0	0	0	0	0	0	0	0	0	0	0	0
d__Eukaryota;p__Streptophyta;c__Magnoliopsida;o__Zingiberales;f__Musaceae;g__Musa;s__Musaacuminata	0	0	0	0	0	0	0	0	0	0	0	0	0	0	0	0	0	0	0	0	0	0	0	0	0	0	0	0	0	0	0	0	0	0	0	0	0	0	0	0	0	0	0	0	0	0	0	0	0
d__Eukaryota;p__Streptophyta;c__Magnoliopsida;o__Rosales;f__Rosaceae;g__Spiraea;s__Spiraeatrilobata	0	0	0	0	0	0	0	0	0	0	0	0	0	0	0	0	0	0	0	0	0	0	0	0	0	0	0	0	0	0	0	0	0	0	0	0	0	0	0	0	0	0	0	0	0	0	0	0	0
d__Eukaryota;p__Streptophyta;c__Magnoliopsida;o__Poales;f__Poaceae;g__Elymus;s__Elymustangutorum	0	0	0	0	0	0	0	0	0	0	0	0	0	0	0	0	0	0	0	0	0	0	0	0	0	0	0	0	4	0	28	0	0	15	4	0	0	0	0	0	0	0	0	0	0	0	0	0	0
d__Eukaryota;p__Streptophyta;c__Magnoliopsida;o__Lamiales;f__Acanthaceae;g__Strobilanthes;s__Strobilanthescusia	0	0	0	0	0	0	0	0	0	0	0	0	0	0	0	0	0	0	0	0	0	0	0	0	0	0	0	0	0	0	0	0	0	0	0	0	0	0	0	0	0	0	0	0	0	0	0	0	0
d__Eukaryota;p__Streptophyta;c__Magnoliopsida;o__Boraginales;f__Boraginaceae;g__Thyrocarpus;s__Thyrocarpusglochidiatus	0	0	0	0	0	0	0	0	0	0	0	0	0	0	0	0	0	0	0	0	0	0	0	0	0	0	0	0	0	0	0	0	0	0	0	0	0	0	0	0	0	0	0	0	0	0	0	0	0
d__Eukaryota;p__Streptophyta;c__Magnoliopsida;o__Poales;f__Poaceae;g__Hordeum;s__Hordeumvulgare	0	0	0	0	0	0	0	0	0	0	0	0	0	0	0	0	0	0	0	0	0	0	0	0	0	0	0	0	0	0	0	0	0	0	0	0	0	0	0	0	0	0	0	0	0	0	0	0	0
d__Eukaryota;p__Streptophyta;c__Magnoliopsida;o__Rosales;f__Rosaceae;g__Agrimonia;s__Agrimoniapilosa	0	0	0	0	0	0	0	0	0	0	0	0	0	0	0	0	0	0	0	0	0	0	0	0	0	0	0	0	0	0	0	0	0	0	0	0	0	0	0	0	0	0	0	0	0	0	0	0	0
d__Eukaryota;p__Streptophyta;c__Magnoliopsida;o__Rosales;f__Rosaceae;g__Sorbus;s__Sorbusaucuparia	0	0	0	0	0	0	0	0	0	0	0	0	0	0	0	0	0	0	0	0	0	0	0	0	0	0	0	0	0	0	0	0	0	0	0	0	0	0	0	0	0	0	0	0	0	0	0	0	0
d__Eukaryota;p__Streptophyta;c__Magnoliopsida;o__Caryophyllales;f__Amaranthaceae;g__Amaranthus;s__Amaranthusretroflexus	0	0	0	0	0	0	0	0	0	35	0	0	0	0	0	0	0	0	0	0	0	0	0	0	0	0	0	0	0	0	0	0	0	0	0	0	0	0	0	0	0	0	0	0	0	0	0	0	0
d__Eukaryota;p__Streptophyta;c__Magnoliopsida;o__Vitales;f__Vitaceae;g__Vitis;s__Vitisriparia	0	0	0	0	0	0	0	0	0	0	0	0	0	0	0	0	0	0	0	0	0	0	0	0	0	0	0	0	0	0	0	0	0	0	0	0	0	0	0	0	0	0	0	0	0	0	0	0	0
d__Eukaryota;p__Streptophyta;c__Polypodiopsida;o__Polypodiales;f__Pteridaceae;g__Pteris;s__Pterisensiformis	0	0	0	0	0	0	0	0	0	0	0	0	0	0	0	0	0	0	0	0	0	0	0	0	0	0	0	0	0	0	0	0	0	0	0	0	0	0	0	0	0	0	0	0	0	0	0	0	0
d__Eukaryota;p__Streptophyta;c__Magnoliopsida;o__Cucurbitales;f__Cucurbitaceae;g__Cucurbita;s__Cucurbitapepo	0	0	0	0	0	0	0	0	0	0	0	0	0	0	0	0	0	0	0	0	0	0	0	0	0	0	0	0	0	0	0	0	0	0	0	0	0	0	0	0	0	0	0	0	0	0	0	0	0
d__Eukaryota;p__Streptophyta;c__Magnoliopsida;o__Caryophyllales;f__Polygonaceae;g__Persicaria;s__Persicariamaackiana	0	0	0	0	0	0	0	0	0	0	0	0	0	0	0	0	0	0	0	0	0	0	0	0	0	0	0	0	0	0	0	0	0	0	0	0	0	0	0	0	0	0	0	0	0	0	0	0	0
d__Eukaryota;p__Streptophyta;c__Magnoliopsida;o__Rosales;f__Moraceae;g__Broussonetia;s__Broussonetiapapyrifera	0	0	0	0	0	0	48	0	0	0	0	0	0	0	0	0	0	0	0	0	0	0	0	0	0	0	0	0	0	0	0	0	0	0	0	0	0	0	0	0	0	0	1	0	0	0	0	0	0
d__Eukaryota;p__Streptophyta;c__Magnoliopsida;o__Solanales;f__Convolvulaceae;g__Ipomoea;s__Ipomoeanil	0	0	0	0	0	0	0	0	0	0	0	0	0	0	0	0	0	0	0	0	0	0	0	0	0	0	0	0	0	0	0	0	0	0	0	0	0	0	0	0	0	0	0	0	0	0	0	0	0
d__Eukaryota;p__Streptophyta;c__Magnoliopsida;o__Rosales;f__Rosaceae;g__Malus;s__Malussylvestris	0	0	0	0	0	0	0	0	0	0	0	0	0	0	0	0	0	0	0	0	0	0	0	0	0	0	0	0	0	0	0	0	0	0	0	0	0	0	0	0	0	0	0	0	0	0	0	0	0
d__Eukaryota;p__Streptophyta;c__Magnoliopsida;o__Sapindales;f__Rutaceae;g__Zanthoxylum;s__Zanthoxylumpiasezkii	0	0	0	0	0	0	0	0	0	0	0	0	0	0	0	0	0	0	0	0	0	0	0	0	0	0	0	0	0	0	0	0	0	0	0	0	0	0	0	0	0	0	0	0	0	0	0	0	0
d__Eukaryota;p__Streptophyta;c__Magnoliopsida;o__Caryophyllales;f__Polygonaceae;g__Rumex;s__Rumexcrispus	0	0	0	0	0	0	0	0	0	0	0	0	0	0	0	0	0	0	0	0	0	0	0	0	0	0	0	0	38	0	0	0	0	22	0	0	0	0	0	0	0	0	0	0	0	0	0	0	0
d__Eukaryota;p__Streptophyta;c__Magnoliopsida;o__Cucurbitales;f__Cucurbitaceae;g__Citrullus;s__Citrulluslanatus	0	0	0	0	0	0	0	0	0	0	0	0	0	0	0	0	0	0	0	0	0	0	0	0	0	0	0	0	0	0	0	0	0	0	0	0	0	0	0	0	0	0	0	0	0	0	0	0	0
d__Eukaryota;p__Streptophyta;c__Magnoliopsida;o__Brassicales;f__Brassicaceae;g__Dontostemon;s__Dontostemondentatus	0	0	0	0	0	0	0	0	0	0	0	0	0	0	0	0	0	0	0	0	0	0	0	0	0	0	0	0	0	0	0	0	0	0	0	0	0	0	0	0	0	0	0	0	0	0	0	0	0
d__Eukaryota;p__Streptophyta;c__Pinopsida;o__Pinales;f__Pinaceae;g__Pinus;s__Pinusmugo	0	0	0	0	0	0	0	0	0	0	0	0	0	0	0	0	0	0	0	0	0	0	0	0	0	0	0	0	0	0	0	0	0	0	0	0	0	0	0	0	0	0	0	0	0	0	0	0	0
d__Eukaryota;p__Streptophyta;c__Magnoliopsida;o__Lamiales;f__Lamiaceae;g__Salvia;s__Salviatesquicola	0	0	0	0	0	0	0	0	0	0	0	0	0	0	0	0	0	0	0	0	0	0	0	0	0	0	0	0	0	0	0	0	0	0	0	0	0	0	0	0	0	0	0	0	0	0	0	0	0
d__Eukaryota;p__Streptophyta;c__Magnoliopsida;o__Myrtales;f__Lythraceae;g__Rotala;s__Rotalarotundifolia	0	0	0	0	0	0	0	0	0	0	0	0	0	0	0	0	0	0	0	0	0	0	0	0	0	0	0	0	0	0	0	0	0	0	0	0	0	0	0	0	0	0	0	0	0	0	0	0	0
d__Eukaryota;p__Streptophyta;c__Magnoliopsida;o__Solanales;f__Solanaceae;g__Nicotiana;s__Nicotianasp.PMW-2021	0	0	0	0	0	0	0	0	0	0	0	0	0	0	0	0	0	0	0	0	0	0	0	0	0	0	0	0	0	0	0	0	0	0	0	0	0	0	0	0	0	0	0	0	0	0	0	0	0
d__Eukaryota;p__Streptophyta;c__Magnoliopsida;o__Caryophyllales;f__Amaranthaceae;g__Amaranthus;s__Amaranthuspalmeri	0	0	0	0	0	0	0	0	0	0	0	0	0	0	0	0	0	0	0	0	0	0	0	0	0	0	0	0	0	0	0	0	0	0	0	0	0	0	0	0	0	0	0	0	0	0	0	0	0
d__Eukaryota;p__Streptophyta;c__Magnoliopsida;o__Gentianales;f__Gentianaceae;g__Eustoma;s__Eustomaexaltatum	0	0	0	0	0	0	0	0	0	0	0	0	0	0	0	0	0	0	0	0	0	0	0	0	0	0	0	0	0	0	0	0	0	0	0	0	0	0	0	0	0	0	0	0	0	0	0	0	0
d__Eukaryota;p__Streptophyta;c__Magnoliopsida;o__Poales;f__Poaceae;g__Echinochloa;s__Echinochloacolona	0	0	0	0	0	0	0	0	0	0	0	0	0	0	0	0	0	0	0	0	0	0	0	0	0	0	0	0	0	0	0	0	0	0	0	0	0	0	0	0	0	0	0	0	0	0	0	0	0
d__Eukaryota;p__Streptophyta;c__Magnoliopsida;o__Lamiales;f__Verbenaceae;g__Glandularia;s__Glandulariascrobiculata	0	0	0	0	0	0	0	0	0	0	0	0	3	0	16	8	0	0	6	37	4	0	0	0	0	0	0	0	0	0	0	0	0	0	0	0	0	0	0	0	0	0	0	0	0	0	0	0	0
d__Eukaryota;p__Streptophyta;c__Magnoliopsida;o__Rosales;f__Rosaceae;g__Prunus;s__Prunusferganensis	0	0	0	0	0	0	0	0	0	0	0	0	0	0	0	0	0	0	0	0	0	0	0	0	0	0	0	0	0	0	0	0	0	0	0	0	0	0	0	0	0	0	0	0	0	0	0	0	0
d__Eukaryota;p__Streptophyta;c__Magnoliopsida;o__Lamiales;f__Pedaliaceae;g__Sesamum;s__Sesamumindicum	0	0	0	0	0	0	0	0	0	0	0	0	0	0	0	0	0	0	0	0	0	0	0	0	0	0	0	0	0	0	0	0	0	0	0	0	0	0	0	0	0	0	0	0	0	0	0	0	0
d__Eukaryota;p__Streptophyta;c__Magnoliopsida;o__Poales;f__Poaceae;g__Setaria;s__Setariaitalica	0	0	0	0	0	0	0	0	0	0	0	0	0	0	0	0	0	0	0	0	0	0	0	0	0	0	0	0	0	0	0	0	0	0	0	0	0	0	0	0	0	0	0	0	0	0	0	0	0
d__Eukaryota;p__Streptophyta;c__Magnoliopsida;o__Asterales;f__Asteraceae;g__Artemisia;s__Artemisiaarmeniaca	0	0	0	0	0	0	0	0	0	0	0	0	0	0	0	0	0	0	0	0	0	0	0	0	0	0	0	0	0	0	0	0	0	0	0	0	0	0	0	0	0	0	0	0	0	0	0	0	0
d__Eukaryota;p__Streptophyta;c__Magnoliopsida;o__Solanales;f__Convolvulaceae;g__Convolvulus;s__Convolvulusmicrophyllus	0	0	0	0	0	0	0	0	0	0	0	0	0	0	0	0	0	0	0	0	0	0	0	0	0	0	0	0	0	0	0	0	0	0	0	0	0	0	0	0	0	0	0	0	0	0	0	0	0
d__Eukaryota;p__Streptophyta;c__Magnoliopsida;o__Lamiales;f__Lamiaceae;g__Leonurus;s__Leonurussibiricus	0	0	0	0	0	0	0	0	0	0	0	0	0	0	0	0	0	0	0	0	0	0	0	0	0	0	0	0	0	0	0	0	0	0	0	0	0	0	0	0	0	0	0	0	0	0	0	0	0
d__Eukaryota;p__Streptophyta;c__Magnoliopsida;o__Myrtales;f__Lythraceae;g__Lythrum;s__Lythrumsalicaria	0	0	0	0	0	0	0	0	0	0	0	0	0	0	0	0	0	0	0	0	0	0	0	0	0	0	0	0	0	0	0	0	0	0	0	0	0	0	0	0	0	0	0	0	0	0	0	0	0
d__Eukaryota;p__Streptophyta;c__Magnoliopsida;o__Santalales;f__Amphorogynaceae;g__Dendrotrophe;s__Dendrotrophefrutescens	0	0	0	0	0	0	0	0	0	0	0	0	0	0	0	0	0	0	0	0	0	0	0	0	0	0	0	0	0	0	0	0	0	0	0	0	0	0	0	0	0	0	0	0	0	0	0	0	0
d__Eukaryota;p__Streptophyta;c__Magnoliopsida;o__Ranunculales;f__Ranunculaceae;g__Thalictrum;s__Thalictrumdasycarpum	0	0	0	0	0	0	0	0	0	0	0	0	0	0	0	0	0	0	0	0	0	0	0	0	0	0	0	0	0	0	0	0	0	0	0	0	0	0	0	0	0	0	0	0	0	0	0	0	0
d__Eukaryota;p__Streptophyta;c__Magnoliopsida;o__Cucurbitales;f__Cucurbitaceae;g__Cionosicys;s__Cionosicysmacranthus	0	0	0	0	0	0	0	0	0	0	0	0	0	0	0	0	0	0	0	0	0	0	0	0	0	0	0	0	0	0	0	0	0	0	0	0	0	0	0	0	0	0	0	0	0	0	0	0	0
d__Eukaryota;p__Streptophyta;c__Magnoliopsida;o__Lamiales;f__Lamiaceae;g__Mentha;s__Menthacanadensis	0	0	0	0	0	0	0	0	0	0	0	0	0	0	0	0	0	0	0	0	0	0	0	0	0	0	0	0	0	0	0	0	0	0	0	0	0	0	0	0	0	0	0	0	0	0	0	0	0
d__Eukaryota;p__Streptophyta;c__Magnoliopsida;o__Cucurbitales;f__Cucurbitaceae;g__Cucurbita;s__Cucurbitaficifolia	0	0	0	0	0	0	0	0	0	0	0	0	0	0	0	0	0	0	0	0	0	0	0	0	0	0	0	0	0	0	0	0	0	0	0	0	0	0	0	0	0	0	0	0	0	0	0	0	0
d__Eukaryota;p__Streptophyta;c__Magnoliopsida;o__Rosales;f__Rosaceae;g__Prunus;s__Prunusdavidiana	0	0	0	0	0	0	0	0	0	0	0	0	0	0	0	0	0	0	0	0	0	0	0	0	0	0	0	0	0	0	0	0	0	0	0	0	0	0	0	0	0	0	0	0	0	0	0	0	0
d__Eukaryota;p__Streptophyta;c__Pinopsida;o__Pinales;f__Pinaceae;g__Pinus;s__Pinusarmandii	0	0	0	0	0	0	0	0	0	0	0	0	0	0	0	0	0	0	0	0	0	0	0	0	0	0	0	0	0	0	0	0	0	0	0	0	0	0	0	0	0	0	0	0	0	0	0	0	0
d__Eukaryota;p__Streptophyta;c__Magnoliopsida;o__Poales;f__Poaceae;g__Elymus;s__Elymusciliaris	0	0	0	0	0	0	0	0	0	0	0	0	0	0	0	0	0	0	0	0	0	0	0	0	0	0	0	0	0	0	0	0	0	0	0	0	0	0	0	0	0	0	0	0	0	0	0	0	0
d__Eukaryota;p__Streptophyta;c__Magnoliopsida;o__Rosales;f__Ulmaceae;g__Ulmus;s__Ulmusparvifolia	0	0	0	0	0	0	0	0	0	0	0	0	0	0	0	0	0	0	0	0	0	0	0	0	0	0	0	0	0	0	0	0	0	0	0	0	0	0	0	0	0	0	0	0	0	0	0	0	0
d__Eukaryota;p__Streptophyta;c__Magnoliopsida;o__Vitales;f__Vitaceae;g__Vitis;s__Vitissp.BOP010263	0	0	0	0	0	0	0	0	0	0	0	0	0	0	0	0	0	0	0	0	0	0	0	0	0	0	0	0	0	0	0	0	0	0	0	0	0	0	0	0	0	0	0	0	0	0	0	0	0
d__Eukaryota;p__Streptophyta;c__Magnoliopsida;o__Asterales;f__Asteraceae;g__Ambrosia;s__Ambrosiatenuifolia	0	0	0	0	0	0	0	0	0	0	0	0	0	0	0	0	0	0	0	0	0	0	0	0	0	0	0	0	0	0	0	0	0	0	0	0	0	0	0	0	0	0	0	0	0	0	0	0	0
d__Eukaryota;p__Streptophyta;c__Magnoliopsida;o__Caryophyllales;f__Chenopodiaceae;g__Chenopodium;s__Chenopodiumficifolium	0	0	0	0	0	0	0	0	0	0	0	0	0	0	0	0	0	0	0	0	0	0	0	0	0	0	0	0	0	0	0	0	0	0	0	0	0	0	0	0	0	0	0	0	2	0	0	0	0
d__Eukaryota;p__Streptophyta;c__Magnoliopsida;o__Dipsacales;f__Caprifoliaceae;g__Weigela;s__Weigelaflorida	0	0	0	0	0	0	0	0	0	0	0	0	0	0	0	0	0	0	0	0	0	0	0	0	0	0	0	0	0	0	0	0	0	0	0	0	0	0	0	0	0	0	0	0	0	0	0	0	0
d__Eukaryota;p__Streptophyta;c__Magnoliopsida;o__Asterales;f__Asteraceae;g__Saussurea;s__Saussureayunnanensis	0	0	0	0	0	0	0	0	0	0	0	0	0	0	0	0	0	0	0	0	0	0	0	0	0	0	0	0	0	0	0	0	0	0	0	0	0	0	0	0	0	0	0	0	0	0	0	0	0
d__Eukaryota;p__Streptophyta;c__Magnoliopsida;o__Fabales;f__Fabaceae;g__Vicia;s__Viciavillosa	0	0	0	0	0	0	0	0	0	0	0	0	0	0	0	0	0	0	0	0	0	0	0	0	0	0	0	0	0	0	0	0	0	0	0	0	0	0	0	0	0	0	0	0	0	0	0	0	0
d__Eukaryota;p__Streptophyta;c__Magnoliopsida;o__Solanales;f__Solanaceae;g__Nicotiana;s__Nicotianaobtusifolia	0	0	0	0	0	0	0	0	0	0	0	0	0	0	0	0	0	0	0	0	0	0	0	0	0	0	0	0	0	0	0	0	0	0	0	0	0	0	0	0	0	0	0	0	0	0	0	0	0
d__Eukaryota;p__Streptophyta;c__Polypodiopsida;o__Polypodiales;f__Pteridaceae;g__Pteris;s__Pterisvittata	0	0	0	0	0	0	0	0	0	0	0	0	0	0	0	0	0	0	0	0	0	0	0	0	0	0	0	0	0	0	0	0	0	0	0	0	0	0	0	0	0	0	0	0	0	0	0	0	0
d__Eukaryota;p__Streptophyta;c__Magnoliopsida;o__Lamiales;f__Oleaceae;g__Fraxinus;s__Fraxinusamericana	0	0	0	0	0	0	0	0	0	0	0	0	0	0	0	0	0	0	0	0	0	0	0	0	0	0	0	0	0	0	0	0	0	0	0	0	0	0	0	0	0	0	0	0	0	0	0	0	0
d__Eukaryota;p__Streptophyta;c__Magnoliopsida;o__Geraniales;f__Geraniaceae;g__Geranium;s__Geraniumaff.brevicauleCHR505529	0	0	0	0	0	0	0	0	0	0	0	0	0	0	42	0	0	0	0	0	0	0	0	0	0	0	0	0	0	0	0	0	0	10	0	0	0	0	0	0	0	0	0	0	0	0	0	0	0
d__Eukaryota;p__Streptophyta;c__Magnoliopsida;o__Asterales;f__Asteraceae;g__Ixeris;s__Ixerischinensis	0	0	0	0	0	0	0	0	0	0	0	0	0	0	0	0	0	0	0	0	0	0	0	0	0	0	0	0	0	0	0	0	0	0	0	0	0	0	0	0	0	0	0	0	0	0	0	0	0
d__Eukaryota;p__Streptophyta;c__Magnoliopsida;o__Solanales;f__Convolvulaceae;g__Ipomoea;s__Ipomoeahederacea	0	0	0	0	0	0	0	0	0	0	0	0	0	0	0	0	0	0	0	0	0	0	0	0	0	0	0	0	0	0	0	0	0	0	0	0	0	0	0	0	0	0	0	0	0	0	0	0	0
d__Eukaryota;p__Streptophyta;c__Magnoliopsida;o__Asterales;f__Asteraceae;g__Artemisia;s__Artemisiaanomala	0	0	0	0	0	0	0	0	0	0	0	0	0	0	0	0	0	0	0	0	0	0	0	0	0	0	0	0	0	0	0	0	0	0	0	0	0	0	0	0	0	0	0	0	0	0	0	0	0
d__Eukaryota;p__Streptophyta;c__Magnoliopsida;o__Asterales;f__Asteraceae;g__Bidens;s__Bidensbiternata	0	0	0	0	0	0	0	0	0	0	0	0	0	0	0	0	0	0	0	0	0	0	0	0	0	0	0	0	0	0	0	0	0	0	0	0	0	0	0	0	0	0	0	0	0	0	0	0	0
d__Eukaryota;p__Streptophyta;c__Magnoliopsida;o__Asterales;f__Asteraceae;g__Xanthium;s__Xanthiumsibiricum	0	0	0	0	0	0	0	0	0	0	0	0	0	0	0	0	0	0	0	0	0	0	0	0	0	0	0	0	0	0	0	0	0	0	0	0	0	0	0	0	0	0	0	0	0	0	0	0	0
d__Eukaryota;p__Streptophyta;c__Magnoliopsida;o__Asterales;f__Asteraceae;g__Crepis;s__Crepisalpestris	0	0	0	0	0	0	0	0	0	0	0	0	0	0	0	0	0	0	0	0	0	0	0	0	0	0	0	0	0	0	0	0	0	0	0	0	0	0	0	0	0	0	0	0	0	0	0	0	0
d__Eukaryota;p__Streptophyta;c__Magnoliopsida;o__Brassicales;f__Brassicaceae;g__Neuontobotrys;s__Neuontobotrystarapacana	12	0	0	0	0	0	0	0	1	0	0	0	0	0	0	0	0	0	0	0	0	0	1	0	0	0	0	0	0	0	0	6	0	0	0	0	0	0	0	21	0	0	0	0	0	0	0	0	0
d__Eukaryota;p__Streptophyta;c__Magnoliopsida;o__Lamiales;f__Oleaceae;g__Fraxinus;s__Fraxinuschinensis	0	0	0	0	0	0	0	0	0	0	0	0	0	0	0	0	0	0	0	0	0	0	0	0	0	0	0	0	0	0	0	0	0	0	0	0	0	0	0	0	0	0	0	0	0	0	0	0	0
d__Eukaryota;p__Streptophyta;c__Magnoliopsida;o__Lamiales;f__Plantaginaceae;g__Veronica;s__Veronicaoxycarpa	0	0	0	0	0	0	0	0	0	0	0	0	0	0	0	0	0	0	0	0	0	0	0	0	0	0	0	0	0	0	0	0	0	0	0	0	0	0	0	0	0	0	0	0	0	0	0	0	0
d__Eukaryota;p__Streptophyta;c__Magnoliopsida;o__Caryophyllales;f__Chenopodiaceae;g__Atriplex;s__Atriplexsemibaccata	0	0	0	0	0	0	0	0	0	48	0	0	0	0	0	0	0	0	0	0	0	0	0	0	0	0	0	0	0	0	0	0	0	0	0	0	0	0	0	0	0	0	0	0	0	0	0	0	0
d__Eukaryota;p__Streptophyta;c__Magnoliopsida;o__Malpighiales;f__Salicaceae;g__Salix;s__Salixgilashanica	0	0	0	0	0	0	0	0	0	0	0	0	0	0	0	0	0	0	0	0	0	0	0	0	0	0	0	0	0	0	0	0	0	0	0	0	0	0	0	0	0	0	0	0	0	0	0	0	0
d__Eukaryota;p__Streptophyta;c__Magnoliopsida;o__Rosales;f__Ulmaceae;g__Ulmus;s__Ulmusuyematsui	0	0	0	0	0	0	0	0	0	0	0	0	0	0	0	0	0	0	0	0	0	0	0	0	0	0	0	0	0	0	0	0	0	0	0	0	0	0	0	0	0	0	0	0	0	0	0	0	0
d__Eukaryota;p__Streptophyta;c__Magnoliopsida;o__Asterales;f__Asteraceae;g__Cirsium;s__Cirsiumsetosum	0	0	0	0	0	0	0	0	0	0	0	0	0	0	0	0	0	0	0	0	0	0	0	0	0	0	0	0	0	0	0	0	0	0	0	0	0	0	0	0	0	0	0	0	0	0	0	0	0
d__Eukaryota;p__Streptophyta;c__Magnoliopsida;o__Rosales;f__Rosaceae;g__Fragaria;s__Fragariamoschata	0	0	0	0	0	0	0	0	0	0	0	0	0	0	0	0	0	0	0	0	0	0	0	0	0	0	0	0	0	0	0	0	0	0	0	0	0	0	0	0	0	0	0	0	0	0	0	0	0
d__Eukaryota;p__Streptophyta;c__Magnoliopsida;o__Rosales;f__Rosaceae;g__Geum;s__Geumhispidum	0	0	0	0	0	0	0	0	0	0	0	0	0	0	0	0	0	0	0	0	0	0	0	0	0	0	0	0	0	0	0	0	0	0	0	0	0	0	0	0	0	0	0	0	0	0	0	0	0
d__Eukaryota;p__Streptophyta;c__Magnoliopsida;o__Rosales;f__Rosaceae;g__Potentilla;s__Potentillasaundersiana	0	0	0	0	0	0	0	0	0	0	0	0	0	0	0	0	0	0	0	0	0	0	0	0	0	0	0	0	0	0	0	0	0	0	0	0	0	0	0	0	0	0	0	0	0	0	0	0	0
d__Eukaryota;p__Streptophyta;c__Magnoliopsida;o__Rosales;f__Rosaceae;g__Sorbus;s__Sorbustianschanica	0	0	0	0	0	0	0	0	0	0	0	0	0	0	0	0	0	0	0	0	0	0	0	0	0	0	0	0	0	0	0	0	0	0	0	0	0	0	0	0	0	0	0	0	0	0	0	0	0
d__Eukaryota;p__Streptophyta;c__Magnoliopsida;o__Solanales;f__Solanaceae;g__Solanum;s__Solanumsp.LR-2018	0	0	0	0	0	0	0	0	0	0	0	0	0	0	0	0	0	0	0	0	0	0	0	0	0	0	0	0	0	0	0	0	0	0	0	0	0	0	0	0	0	0	0	0	0	0	0	0	0
d__Eukaryota;p__Streptophyta;c__Magnoliopsida;o__Asterales;f__Asteraceae;g__Hieracium;s__Hieraciumintybaceum	0	0	0	0	0	0	0	0	0	0	0	0	0	0	0	0	0	0	0	0	0	0	0	0	0	0	0	0	0	0	0	0	0	0	0	0	0	0	0	0	0	0	0	0	0	0	0	0	0
d__Eukaryota;p__Streptophyta;c__Magnoliopsida;o__Fabales;f__Fabaceae;g__Errazurizia;s__Errazuriziarotundata	0	0	0	0	0	0	0	0	0	0	0	0	0	0	0	0	0	0	0	0	0	0	0	0	0	0	0	0	0	0	0	0	0	0	0	0	0	0	0	0	0	0	0	0	0	0	0	0	0
d__Eukaryota;p__Streptophyta;c__Magnoliopsida;o__Fabales;f__Fabaceae;g__Medicago;s__Medicagosativa	0	0	0	0	0	0	0	0	0	0	0	0	0	0	0	0	0	0	0	0	0	0	0	0	0	0	0	0	0	0	0	0	0	0	0	0	0	0	0	0	0	0	0	0	0	0	0	0	0
d__Eukaryota;p__Streptophyta;c__Magnoliopsida;o__Rosales;f__Rosaceae;g__Cliffortia;s__Cliffortiacastanea	0	0	0	0	0	0	0	0	0	0	0	0	0	0	0	0	0	0	0	0	0	0	0	0	0	0	0	0	0	0	0	0	0	0	0	0	0	0	0	0	0	0	0	0	0	0	0	0	0
d__Eukaryota;p__Streptophyta;c__Magnoliopsida;o__Rosales;f__Rosaceae;g__Potentilla;s__Potentillahookeriana	0	0	0	0	0	0	0	0	0	0	0	0	0	0	0	0	0	0	0	0	0	0	0	0	0	0	0	0	0	0	0	0	0	0	0	0	0	0	0	0	0	0	0	0	0	0	0	0	0
d__Eukaryota;p__Streptophyta;c__Magnoliopsida;o__Malvales;f__Malvaceae;g__Hibiscus;s__Hibiscuslasiocarpos	0	0	0	0	0	0	0	0	0	0	0	0	0	0	0	0	0	0	0	0	0	0	0	0	0	0	0	0	0	0	0	0	0	0	0	0	0	0	0	0	0	0	0	0	0	0	0	0	0
d__Eukaryota;p__Streptophyta;c__Magnoliopsida;o__Asterales;f__Asteraceae;g__Cirsium;s__Cirsiumcomosum	0	0	0	0	0	0	0	0	0	0	0	0	0	0	0	0	0	0	0	0	0	0	0	0	0	0	0	0	0	0	0	0	0	0	0	0	0	0	0	0	0	0	0	0	0	0	0	0	0
d__Eukaryota;p__Streptophyta;c__Magnoliopsida;o__Lamiales;f__Plantaginaceae;g__Veronica;s__Veronicakaiseri	0	0	0	0	0	0	0	0	0	0	0	0	0	0	0	0	0	0	0	0	0	0	0	0	0	0	0	0	0	0	0	0	0	0	0	0	0	0	0	0	0	0	0	0	0	0	0	0	0
d__Eukaryota;p__Streptophyta;c__Magnoliopsida;o__Poales;f__Poaceae;g__Elymus;s__Elymusburchan-buddae	0	0	0	0	0	0	0	0	0	0	0	0	0	0	0	0	0	0	0	0	0	0	0	0	0	0	0	0	0	0	7	0	0	2	0	0	0	0	0	0	0	0	0	0	0	0	0	0	0
d__Eukaryota;p__Streptophyta;c__Magnoliopsida;o__Lamiales;f__Plantaginaceae;g__Plantago;s__Plantagomajor	0	0	0	0	0	0	0	0	0	0	0	0	0	0	0	0	0	0	0	0	0	0	0	0	0	0	0	0	0	0	0	0	0	0	0	0	0	0	0	0	0	0	0	0	0	0	0	0	0
d__Eukaryota;p__Streptophyta;c__Magnoliopsida;o__Asparagales;f__Amaryllidaceae;g__Allium;s__Alliumtenuissimum	0	0	0	0	0	0	0	0	0	0	0	0	0	0	0	0	0	0	0	0	0	0	0	0	0	0	0	0	0	0	0	0	0	0	0	0	0	0	0	0	0	0	0	0	0	0	0	0	0
d__Eukaryota;p__Streptophyta;c__Magnoliopsida;o__Asterales;f__Asteraceae;g__Bidens;s__Bidenshawaiensis	0	0	0	0	0	0	0	0	0	0	0	0	0	0	0	0	0	0	0	0	0	0	0	0	0	0	0	0	0	0	0	0	0	0	0	0	0	0	0	0	0	0	0	0	0	0	0	0	0
d__Eukaryota;p__Streptophyta;c__Magnoliopsida;o__Fabales;f__Fabaceae;g__Butea;s__Buteamonosperma	0	0	0	0	0	0	0	0	0	0	0	0	0	0	0	0	0	0	0	0	0	0	0	0	0	0	0	0	0	0	0	0	0	0	0	0	0	0	0	0	0	0	0	0	0	0	0	0	0
d__Eukaryota;p__Streptophyta;c__Pinopsida;o__Pinales;f__Pinaceae;g__Pinus;s__Pinussibirica	0	0	0	0	0	0	0	0	0	0	0	0	0	0	0	0	0	0	0	0	0	0	0	0	0	0	0	0	0	0	0	0	0	0	0	0	0	0	0	0	0	0	0	0	0	0	0	0	0
d__Eukaryota;p__Streptophyta;c__Magnoliopsida;o__Caryophyllales;f__Chenopodiaceae;g__Spinacia;s__Spinaciaoleracea	0	0	0	0	0	0	0	0	0	0	0	0	0	0	0	0	0	0	0	0	0	0	0	0	0	0	0	0	0	0	0	0	35	0	0	0	0	0	0	0	0	0	0	0	0	0	0	0	0
d__Eukaryota;p__Streptophyta;c__Magnoliopsida;o__Fagales;f__Betulaceae;g__Betula;s__Betulaalnoides	0	0	0	0	0	0	0	0	0	0	0	0	0	0	0	0	0	0	0	0	0	0	0	0	0	0	0	0	0	0	0	0	0	0	0	0	0	0	0	0	0	0	0	0	0	0	0	0	0
d__Eukaryota;p__Streptophyta;c__Magnoliopsida;o__Lamiales;f__Mazaceae;g__Mazus;s__Mazusstachydifolius	0	0	0	0	0	0	0	0	0	0	0	0	0	0	0	0	0	0	0	0	0	0	0	0	0	0	0	0	0	0	0	0	0	0	0	0	0	0	0	0	0	0	0	0	0	0	0	0	0
d__Eukaryota;p__Streptophyta;c__Magnoliopsida;o__Lamiales;f__Paulowniaceae;g__Paulownia;s__Paulowniatomentosa	0	0	0	0	0	0	0	0	0	0	0	0	0	0	0	0	0	0	0	0	0	0	0	0	0	0	0	0	0	0	0	0	0	0	0	0	0	0	0	0	0	0	0	0	0	0	0	0	0
d__Eukaryota;p__Streptophyta;c__Magnoliopsida;o__Caryophyllales;f__Chenopodiaceae;g__Salicornia;s__Salicorniabrachiata	0	0	0	0	0	0	0	0	0	0	0	0	0	0	0	0	0	0	0	0	0	0	0	0	0	0	0	0	0	0	0	0	0	0	0	0	0	0	0	0	0	0	0	0	0	0	0	0	0
d__Eukaryota;p__Streptophyta;c__Magnoliopsida;o__Poales;f__Poaceae;g__Lolium;s__Loliumletourneuxianum	0	0	0	0	0	0	0	0	0	0	0	0	0	0	0	0	0	0	0	0	0	0	0	0	0	0	0	0	0	0	0	0	0	0	0	0	0	0	0	0	0	0	0	0	0	0	0	0	0
d__Eukaryota;p__Streptophyta;c__Magnoliopsida;o__Asterales;f__Asteraceae;g__Inula;s__Inulasalicina	0	0	0	0	0	0	0	0	0	0	0	0	0	0	0	0	0	0	0	0	0	0	0	0	0	0	0	0	0	0	0	0	0	0	0	0	0	0	0	0	0	0	0	0	0	0	0	0	0
d__Eukaryota;p__Streptophyta;c__Magnoliopsida;o__Poales;f__Poaceae;g__Elymus;s__Elymusrepens	0	0	0	0	0	0	0	0	0	0	0	0	0	0	0	0	0	0	0	0	0	0	0	0	0	0	0	0	0	0	2	0	0	2	0	0	0	0	0	0	0	0	0	0	0	0	0	0	0
d__Eukaryota;p__Streptophyta;c__Magnoliopsida;o__Caryophyllales;f__Amaranthaceae;g__Celosia;s__Celosiacristata	0	0	0	0	0	0	0	0	0	0	0	0	0	0	0	0	0	0	0	0	0	0	0	0	0	0	0	0	0	0	0	0	0	0	0	0	0	0	0	0	0	0	0	0	0	0	0	0	0
d__Eukaryota;p__Streptophyta;c__Magnoliopsida;o__Poales;f__Poaceae;g__Elymus;s__Elymusdolichatherus	0	0	0	0	0	0	0	0	0	0	0	0	0	0	0	0	0	0	0	0	0	0	0	0	0	0	0	0	2	0	10	0	0	1	0	0	0	0	0	0	0	0	0	0	0	0	0	0	0
d__Eukaryota;p__Streptophyta;c__Magnoliopsida;o__Rosales;f__Rosaceae;g__Malus;s__Malusangustifolia	0	0	0	0	0	0	0	0	0	0	0	0	0	0	0	0	0	0	0	0	0	0	0	0	0	0	0	0	0	0	0	0	0	0	0	0	0	0	0	0	0	0	0	0	0	0	0	0	0
d__Eukaryota;p__Streptophyta;c__Magnoliopsida;o__Asterales;f__Asteraceae;g__Ambrosia;s__Ambrosiamagdalenae	0	0	0	0	0	0	0	0	0	0	0	0	0	0	0	0	0	0	0	0	0	0	0	0	0	0	0	0	0	0	0	0	0	0	0	0	0	0	0	0	0	0	0	0	0	0	0	0	0
d__Eukaryota;p__Streptophyta;c__Magnoliopsida;o__Asterales;f__Asteraceae;g__Crepis;s__Crepisnigrescens	0	0	0	0	0	0	0	0	0	0	0	0	0	0	0	0	0	0	0	0	0	0	0	0	0	0	0	0	0	0	0	0	0	0	0	0	0	0	0	0	0	0	0	0	0	0	0	0	0
d__Eukaryota;p__Streptophyta;c__Pinopsida;o__Pinales;f__Pinaceae;g__Pinus;s__Pinusmassoniana	0	0	0	0	0	0	0	0	0	0	0	0	0	0	0	0	0	0	0	0	0	0	0	0	0	0	0	0	0	0	0	0	0	0	0	0	0	0	0	0	0	0	0	0	0	0	0	0	0
d__Eukaryota;p__Streptophyta;c__Magnoliopsida;o__Fagales;f__Betulaceae;g__Betula;s__Betulapapyrifera	0	0	0	0	0	0	0	0	0	0	0	0	0	0	0	0	0	0	0	0	0	0	0	0	0	0	0	0	0	0	0	0	0	0	0	0	0	0	0	0	0	0	0	0	0	0	0	0	0
d__Eukaryota;p__Streptophyta;c__Magnoliopsida;o__Garryales;f__Eucommiaceae;g__Eucommia;s__Eucommiaulmoides	0	0	0	0	0	0	0	0	0	0	0	0	0	0	0	0	0	0	0	0	0	0	0	0	0	0	0	0	0	0	0	0	0	0	0	0	0	0	0	0	0	0	0	0	0	0	0	0	0
d__Eukaryota;p__Streptophyta;c__Magnoliopsida;o__Gentianales;f__Rubiaceae;g__Rubia;s__Rubiabrachypoda	0	0	0	0	0	0	0	0	0	0	0	0	0	0	0	0	0	0	0	0	0	0	0	0	0	0	0	0	0	0	0	0	0	0	0	0	0	0	0	0	0	0	0	0	0	0	0	0	0
d__Eukaryota;p__Streptophyta;c__Magnoliopsida;o__Ranunculales;f__Menispermaceae;g__Menispermum;s__Menispermumdauricum	0	0	0	0	0	0	0	0	0	0	0	0	0	0	0	0	0	0	0	0	0	0	0	0	0	0	0	0	0	0	0	0	0	0	0	0	0	0	0	0	0	0	0	0	0	0	0	0	0
d__Eukaryota;p__Streptophyta;c__Magnoliopsida;o__Rosales;f__Rosaceae;g__Potentilla;s__Potentillaspeciosa	0	0	0	0	0	0	0	0	0	0	0	0	0	0	0	0	0	0	0	0	0	0	0	0	0	0	0	0	0	0	0	0	0	0	0	0	0	0	0	0	0	0	0	0	0	0	0	0	0
d__Eukaryota;p__Streptophyta;c__Magnoliopsida;o__Asterales;f__Asteraceae;g__Artemisia;s__Artemisiacarvifolia	0	0	0	0	0	0	0	0	0	0	0	0	0	0	0	0	0	0	0	0	0	0	0	0	0	0	0	0	0	0	0	0	0	0	0	0	0	0	0	0	0	0	0	0	0	0	0	0	0
d__Eukaryota;p__Streptophyta;c__Magnoliopsida;o__Asterales;f__Asteraceae;g__Erechtites;s__Erechtiteshieraciifolius	0	0	0	0	0	0	0	0	0	0	0	0	0	0	0	0	0	0	0	0	0	0	0	0	0	0	0	0	0	0	0	0	0	0	0	0	0	0	0	0	0	0	0	0	0	0	0	0	0
d__Eukaryota;p__Streptophyta;c__Pinopsida;o__Cupressales;f__Cupressaceae;g__Chamaecyparis;s__Chamaecyparisformosensis	0	0	0	0	0	0	0	0	0	0	0	0	0	0	0	0	0	0	0	0	0	0	0	0	0	0	0	0	0	0	0	0	0	0	0	0	0	0	0	0	0	0	0	0	0	0	0	0	0
d__Eukaryota;p__Streptophyta;c__Pinopsida;o__Pinales;f__Pinaceae;g__Pseudotsuga;s__Pseudotsugasinensis	0	0	0	0	0	0	0	0	0	0	0	0	0	0	0	0	0	0	0	0	0	0	0	0	0	0	0	0	0	0	0	0	0	0	0	0	0	0	0	0	0	0	0	0	0	0	0	0	0
d__Eukaryota;p__Streptophyta;c__Magnoliopsida;o__Fabales;f__Fabaceae;g__Lespedeza;s__Lespedezalichiyuniae	0	0	0	0	0	0	0	0	0	0	0	0	0	0	0	0	0	0	0	0	0	0	0	0	0	0	0	0	0	0	0	0	0	0	0	0	0	0	0	0	0	0	0	0	0	0	0	0	0
d__Eukaryota;p__Streptophyta;c__Magnoliopsida;o__Gentianales;f__Rubiaceae;g__Wendlandia;s__Wendlandiatinctoria	0	0	0	0	0	0	0	0	0	0	0	0	0	0	0	0	0	0	0	0	0	0	0	0	0	0	0	0	0	0	0	0	0	0	0	0	0	0	0	0	0	0	0	0	0	0	0	0	0
d__Eukaryota;p__Streptophyta;c__Magnoliopsida;o__Poales;f__Poaceae;g__Lolium;s__Loliummultiflorum	0	0	0	0	0	0	0	0	0	0	0	0	0	0	0	0	0	0	0	0	0	0	0	0	0	0	0	0	0	0	0	0	0	0	0	0	0	0	0	0	0	0	0	0	0	0	0	0	0
d__Eukaryota;p__Streptophyta;c__Magnoliopsida;o__Rosales;f__Rhamnaceae;g__Rhamnus;s__RhamnuscatharticaxRhamnussaxatilis	0	0	0	0	0	0	0	0	0	0	0	0	0	0	0	0	0	0	0	0	0	0	0	0	0	0	0	0	0	0	0	0	0	0	0	0	0	0	0	0	0	0	0	0	0	0	0	0	0
d__Eukaryota;p__Streptophyta;c__Pinopsida;o__Cupressales;f__Cupressaceae;g__Cunninghamia;s__Cunninghamialanceolata	0	0	0	0	0	0	0	0	0	0	0	0	0	0	0	0	0	0	0	0	0	0	0	0	0	0	0	0	0	0	0	0	0	0	0	0	0	0	0	0	0	0	0	0	0	0	0	0	0
d__Eukaryota;p__Streptophyta;c__Pinopsida;o__Pinales;f__Pinaceae;g__Abies;s__Abiesnordmanniana	0	0	0	0	0	0	0	0	0	0	0	0	0	0	0	0	0	0	0	0	0	0	0	0	0	0	0	0	0	0	0	0	0	0	0	0	0	0	0	0	0	0	0	0	0	0	0	0	0
d__Eukaryota;p__Streptophyta;c__Magnoliopsida;o__Apiales;f__Apiaceae;g__Anethum;s__Anethumgraveolens	0	0	0	0	0	0	0	0	0	0	0	0	0	0	0	0	0	0	1	0	0	0	0	0	0	0	0	0	0	0	0	0	0	0	0	0	0	0	0	0	0	0	0	0	0	0	0	0	0
d__Eukaryota;p__Streptophyta;c__Magnoliopsida;o__Asterales;f__Asteraceae;g__Ratibida;s__Ratibidacolumnifera	0	0	0	0	0	0	0	0	0	0	0	0	0	0	0	0	0	0	0	0	0	0	0	0	0	0	0	0	0	0	0	0	0	0	0	0	0	0	0	0	0	0	0	0	0	0	0	0	0
d__Eukaryota;p__Streptophyta;c__Magnoliopsida;o__Caryophyllales;f__Chenopodiaceae;g__Atriplex;s__Atriplexcanescens	0	0	0	0	0	0	0	0	0	28	0	0	0	0	0	0	0	0	0	0	0	0	0	0	0	0	0	0	0	0	0	0	0	0	0	0	0	0	0	0	0	0	0	0	0	0	0	0	0
d__Eukaryota;p__Streptophyta;c__Magnoliopsida;o__Caryophyllales;f__Tamaricaceae;g__Myricaria;s__Myricarialaxiflora	0	0	0	0	0	0	0	0	0	0	0	0	0	0	0	0	0	0	0	0	0	0	0	0	0	0	0	0	0	0	0	0	0	0	0	0	0	0	0	0	0	0	0	0	0	0	0	0	0
d__Eukaryota;p__Streptophyta;c__Magnoliopsida;o__Fagales;f__Fagaceae;g__Quercus;s__Quercusvariabilis	0	0	0	0	0	0	0	0	0	0	0	0	0	0	0	0	0	0	0	0	0	0	0	0	0	0	0	0	0	0	0	0	0	0	0	0	0	0	0	0	0	0	0	0	0	0	0	0	0
d__Eukaryota;p__Streptophyta;c__Magnoliopsida;o__Lamiales;f__Plantaginaceae;g__Veronica;s__Veronicabeccabunga	0	0	0	0	0	0	0	0	0	0	0	0	0	0	0	0	0	0	0	0	0	0	0	0	0	0	0	0	0	0	0	0	0	0	0	0	0	0	0	0	0	0	0	0	0	0	0	0	0
d__Eukaryota;p__Streptophyta;c__Magnoliopsida;o__Poales;f__Poaceae;g__Lolium;s__Loliumtemulentum	0	0	0	0	0	0	0	0	0	0	0	0	0	0	0	0	0	0	0	0	0	0	0	0	0	0	0	0	0	0	0	0	0	0	0	0	0	0	0	0	0	0	0	0	0	0	0	0	0
d__Eukaryota;p__Streptophyta;c__Magnoliopsida;o__Asterales;f__Asteraceae;g__Saussurea;s__Saussureajaponica	0	0	0	0	0	0	0	0	0	0	0	0	0	0	0	0	0	0	0	0	0	0	0	0	0	0	0	0	0	0	0	0	0	0	0	0	0	0	0	0	0	0	0	0	0	0	0	0	0
d__Eukaryota;p__Streptophyta;c__Magnoliopsida;o__Poales;f__Poaceae;g__Poa;s__Poaannua	0	0	0	0	0	0	1	0	0	0	0	0	0	0	0	0	0	0	0	0	0	0	0	0	0	0	0	0	0	0	0	0	0	3	0	0	0	0	0	0	0	0	0	0	0	0	0	0	0
d__Eukaryota;p__Streptophyta;c__Magnoliopsida;o__Ranunculales;f__Ranunculaceae;g__Clematis;s__Clematisintricata	0	0	0	0	0	0	0	0	0	0	0	0	0	0	0	0	0	0	0	0	0	0	0	0	0	0	0	0	0	0	0	0	0	0	0	0	0	0	0	0	0	0	0	0	0	0	0	0	0
d__Eukaryota;p__Streptophyta;c__Magnoliopsida;o__Rosales;f__Rosaceae;g__Potentilla;s__Potentillachinensis	0	0	0	0	0	0	0	0	0	0	0	0	0	0	0	0	0	0	0	0	0	0	0	0	0	0	0	0	0	0	0	0	0	0	0	0	0	0	0	0	0	0	0	0	0	0	0	0	0
d__Eukaryota;p__Streptophyta;c__Magnoliopsida;o__Rosales;f__Ulmaceae;g__Ulmus;s__Ulmusminor	0	0	0	0	0	0	0	0	0	0	0	0	0	0	0	0	0	0	0	0	0	0	0	0	0	0	0	0	0	0	0	0	0	0	0	0	0	0	0	0	0	0	0	0	0	0	0	0	0
d__Eukaryota;p__Streptophyta;c__Magnoliopsida;o__Apiales;f__Apiaceae;g__Lomatium;s__Lomatiumplanosum	0	1	0	0	1	0	0	0	0	0	0	0	0	0	0	2	2	3	1	0	0	0	0	0	0	0	0	0	0	0	0	0	0	0	0	0	0	0	0	0	0	0	0	0	0	0	0	0	0
d__Eukaryota;p__Streptophyta;c__Magnoliopsida;o__Asterales;f__Asteraceae;g__Artemisia;s__Artemisiarupestris	0	0	0	0	0	0	0	0	0	0	0	0	0	0	0	0	0	0	0	0	0	0	0	0	0	0	0	0	0	0	0	0	0	0	0	0	0	0	0	0	0	0	0	0	0	0	0	0	0
d__Eukaryota;p__Streptophyta;c__Magnoliopsida;o__Malvales;f__Malvaceae;g__Gossypium;s__Gossypiumlongicalyx	0	0	0	0	0	2	0	0	0	0	0	0	0	0	0	0	0	0	0	0	0	0	0	0	0	0	0	0	0	0	0	0	0	0	0	0	0	0	0	0	0	0	0	0	0	0	0	0	0
d__Eukaryota;p__Streptophyta;c__Pinopsida;o__Cupressales;f__Cupressaceae;g__Platycladus;s__Platycladusorientalis	0	0	0	0	0	0	0	0	0	0	0	0	0	0	0	0	0	0	0	0	0	0	0	0	0	0	0	0	0	0	0	0	0	0	0	0	0	0	0	0	0	0	0	0	0	0	0	0	0
d__Eukaryota;p__Streptophyta;c__Magnoliopsida;o__Asterales;f__Asteraceae;g__Smallanthus;s__Smallanthusuvedalia	0	0	0	0	0	0	0	0	0	0	0	0	0	0	0	0	0	0	0	0	0	0	0	0	0	0	0	0	0	0	0	0	0	0	0	0	0	0	0	0	0	0	0	0	0	0	0	0	0
d__Eukaryota;p__Streptophyta;c__Magnoliopsida;o__Brassicales;f__Brassicaceae;g__Isatis;s__Isatistinctoria	8	0	0	0	1	0	0	0	0	0	0	0	0	0	0	0	0	0	0	0	0	0	0	0	0	0	0	0	0	0	0	3	0	0	0	0	0	0	0	10	0	0	0	0	0	0	0	0	0
d__Eukaryota;p__Streptophyta;c__Magnoliopsida;o__Lamiales;f__Lamiaceae;g__Leonurus;s__Leonurusjaponicus	0	0	0	0	0	0	0	0	0	0	0	0	0	0	0	0	0	0	0	0	0	0	0	0	0	0	0	0	0	0	0	0	0	0	0	0	0	0	0	0	0	0	0	0	0	0	0	0	0
d__Eukaryota;p__Streptophyta;c__Magnoliopsida;o__Ranunculales;f__Ranunculaceae;g__Thalictrum;s__Thalictrumsparsiflorum	0	0	0	0	0	0	0	0	0	0	0	0	0	0	0	0	0	0	0	0	0	0	0	0	0	0	0	0	0	0	0	0	0	0	0	0	0	0	0	0	0	0	0	0	0	0	0	0	0
d__Eukaryota;p__Streptophyta;c__Magnoliopsida;o__Asterales;f__Asteraceae;g__Artemisia;s__Artemisiaapiacea	0	0	0	0	0	0	0	0	0	0	0	0	0	0	0	0	0	0	0	0	0	0	0	0	0	0	0	0	0	0	0	0	0	0	0	0	0	0	0	0	0	0	0	0	0	0	0	0	0
d__Eukaryota;p__Streptophyta;c__Magnoliopsida;o__Asterales;f__Asteraceae;g__Carthamus;s__Carthamuslanatus	0	0	0	0	0	0	0	0	0	0	0	0	0	0	0	0	0	0	0	0	0	0	0	0	0	0	0	0	0	0	0	0	0	0	0	0	0	0	0	0	0	0	0	0	0	0	0	0	0
d__Eukaryota;p__Streptophyta;c__Magnoliopsida;o__Asterales;f__Asteraceae;g__Chorisiva;s__Chorisivanevadensis	0	0	0	0	0	0	0	0	0	0	0	0	0	0	0	0	0	0	0	0	0	0	0	0	0	0	0	0	0	0	0	0	0	0	0	0	0	0	0	0	0	0	0	0	0	0	0	0	0
d__Eukaryota;p__Streptophyta;c__Magnoliopsida;o__Brassicales;f__Brassicaceae;g__Matthiola;s__Matthiolarupestris	0	0	0	0	0	0	0	0	0	0	0	0	0	0	0	0	0	0	0	0	0	0	0	0	0	0	0	0	0	0	0	0	0	0	0	0	0	0	0	0	0	0	0	0	0	0	0	0	0
d__Eukaryota;p__Streptophyta;c__Magnoliopsida;o__Rosales;f__Rosaceae;g__Fragaria;s__Fragariaorientalis	0	0	0	0	0	0	0	0	0	0	0	0	0	0	0	0	0	0	0	0	0	0	0	0	0	0	0	0	0	0	0	0	0	0	0	0	0	0	0	0	0	0	0	0	0	0	0	0	0
d__Eukaryota;p__Streptophyta;c__Magnoliopsida;o__Rosales;f__Rosaceae;g__Potentilla;s__Potentillapimpinelloides	0	0	0	0	0	0	0	0	0	0	0	0	0	0	0	0	0	0	0	0	0	0	0	0	0	0	0	0	0	0	0	0	0	0	0	0	0	0	0	0	0	0	0	0	0	0	0	0	0
d__Eukaryota;p__Streptophyta;c__Magnoliopsida;o__Sapindales;f__Sapindaceae;g__Acer;s__Acertruncatum	0	0	0	0	0	0	0	0	0	0	0	0	0	0	0	0	0	0	0	0	0	0	0	0	0	0	0	0	0	0	0	0	0	0	0	0	0	0	0	0	0	0	0	0	0	0	0	0	0
d__Eukaryota;p__Streptophyta;c__Magnoliopsida;o__Cucurbitales;f__Cucurbitaceae;g__Benincasa;s__Benincasahispida	0	0	0	0	0	0	0	0	0	0	0	0	0	0	0	0	0	0	0	0	0	0	0	0	0	0	0	0	0	0	0	0	0	0	0	0	0	0	0	0	0	0	0	0	0	0	0	0	0
d__Eukaryota;p__Streptophyta;c__Magnoliopsida;o__Fabales;f__Fabaceae;g__Astragalus;s__Astragaluscontortuplicatus	0	0	0	0	0	0	0	0	0	0	0	0	0	0	0	0	0	0	0	0	0	0	0	0	0	0	0	0	0	0	0	0	0	0	0	0	0	0	0	0	0	0	0	0	0	0	0	0	0
d__Eukaryota;p__Streptophyta;c__Magnoliopsida;o__Malvales;f__Malvaceae;g__Tilia;s__Tiliajaponica	0	0	0	0	0	0	0	0	0	0	0	0	0	0	0	0	0	0	0	0	0	0	0	0	0	0	0	0	0	0	0	0	0	0	0	0	0	0	0	0	0	0	0	0	0	0	0	0	0
d__Eukaryota;p__Streptophyta;c__Magnoliopsida;o__Vitales;f__Vitaceae;g__Ampelopsis;s__Ampelopsisdelavayana	0	0	0	0	0	0	0	0	0	0	0	0	0	0	0	0	0	0	0	0	0	0	0	0	0	0	0	0	0	0	0	0	0	0	0	0	0	0	0	0	0	0	0	0	0	0	0	0	0
d__Eukaryota;p__Streptophyta;c__Magnoliopsida;o__Fagales;f__Betulaceae;g__Corylus;s__Corylusavellana	0	0	0	0	0	0	0	0	0	0	0	0	0	0	0	0	0	0	0	0	0	0	0	0	0	0	0	0	0	0	0	0	0	0	0	0	0	0	0	0	0	0	0	0	0	0	0	0	0
d__Eukaryota;p__Streptophyta;c__Magnoliopsida;o__Malpighiales;f__Euphorbiaceae;g__Euphorbia;s__Euphorbiaflavicoma	0	0	0	0	0	0	0	0	0	0	0	0	0	0	0	0	0	0	0	0	0	0	0	0	0	0	0	0	0	0	0	0	0	0	0	0	0	0	0	0	0	0	0	0	0	0	0	0	0
d__Eukaryota;p__Streptophyta;c__Magnoliopsida;o__Malpighiales;f__Salicaceae;g__Populus;s__Populusxberolinensis	0	4	0	0	0	0	0	0	0	0	0	0	0	0	0	0	0	0	0	0	0	0	0	0	0	0	0	0	0	0	0	0	0	0	0	0	0	0	0	0	0	0	0	0	0	0	0	0	0
d__Eukaryota;p__Streptophyta;c__Magnoliopsida;o__Poales;f__Poaceae;g__Cleistogenes;s__Cleistogeneshackelii	0	0	0	0	0	0	0	0	0	0	0	0	0	0	0	0	0	0	0	0	0	0	0	0	0	0	0	0	0	0	0	0	0	0	0	0	0	0	0	0	0	0	0	0	0	0	0	0	0
d__Eukaryota;p__Streptophyta;c__Magnoliopsida;o__Solanales;f__Convolvulaceae;g__Merremia;s__Merremiasibirica	0	0	0	0	0	0	0	0	0	0	0	0	0	0	0	0	0	0	0	0	0	0	0	0	0	0	0	0	0	0	0	0	0	0	0	0	0	0	0	0	0	0	0	0	0	0	0	0	0
d__Eukaryota;p__Streptophyta;c__Pinopsida;o__Pinales;f__Pinaceae;g__Keteleeria;s__Keteleeriafortunei	0	0	0	0	0	0	0	0	0	0	0	0	0	0	0	0	0	0	0	0	0	0	0	0	0	0	0	0	0	0	0	0	0	0	0	0	0	0	0	0	0	0	0	0	0	0	0	0	0
d__Eukaryota;p__Streptophyta;c__Magnoliopsida;o__Alismatales;f__Alismataceae;g__Sagittaria;s__Sagittariatrifolia	0	0	0	0	0	0	0	0	0	0	0	0	0	0	0	0	0	0	0	0	0	0	0	0	0	0	0	0	0	0	0	0	0	0	0	0	1	0	0	0	0	0	0	0	0	0	0	0	0
d__Eukaryota;p__Streptophyta;c__Magnoliopsida;o__Asterales;f__Asteraceae;g__Coreopsis;s__Coreopsisgrandiflora	0	0	0	0	0	0	0	0	0	0	0	0	0	0	0	0	0	0	0	0	0	0	0	0	0	0	0	0	0	0	0	0	0	0	0	0	0	0	0	0	0	0	0	0	0	0	0	0	0
d__Eukaryota;p__Streptophyta;c__Magnoliopsida;o__Poales;f__Poaceae;g__Digitaria;s__Digitariasetigera	0	0	0	0	0	0	0	0	0	0	0	0	0	0	0	0	0	0	0	0	0	0	0	0	0	0	0	0	0	0	0	0	0	0	0	0	0	0	0	0	0	0	0	0	0	0	0	0	0
d__Eukaryota;p__Streptophyta;c__Magnoliopsida;o__Poales;f__Poaceae;g__Elymus;s__Elymussibiricus	0	0	0	0	0	0	0	0	0	0	0	0	0	0	0	0	0	0	0	0	0	0	0	0	0	0	0	0	0	0	4	0	0	0	0	0	0	0	0	0	0	0	0	0	0	0	0	0	0
d__Eukaryota;p__Streptophyta;c__Magnoliopsida;o__Asterales;f__Asteraceae;g__Artemisia;s__Artemisiacampestris	0	0	0	0	0	0	0	0	0	0	0	0	0	0	0	0	0	0	0	0	0	0	0	0	0	0	0	0	0	0	0	0	0	0	0	0	0	0	0	0	0	0	0	0	0	0	0	0	0
d__Eukaryota;p__Streptophyta;c__Magnoliopsida;o__Cucurbitales;f__Cucurbitaceae;g__Lagenaria;s__Lagenariasiceraria	0	0	0	0	0	0	0	0	0	0	0	0	0	0	0	0	0	0	0	0	0	0	0	0	0	0	0	0	0	0	0	0	0	0	0	0	0	0	0	0	0	0	0	0	0	0	0	0	0
d__Eukaryota;p__Streptophyta;c__Magnoliopsida;o__Rosales;f__Urticaceae;g__Urtica;s__Urticahyperborea	0	0	0	0	0	0	0	0	0	0	0	0	0	0	0	0	0	0	0	0	0	0	0	0	0	0	0	0	0	0	0	0	0	0	0	0	0	0	0	0	0	0	0	0	0	0	0	0	0
d__Eukaryota;p__Streptophyta;c__Magnoliopsida;o__Solanales;f__Solanaceae;g__Solanum;s__Solanumparishii	0	0	0	0	0	0	0	0	0	0	0	0	0	0	0	0	0	0	0	0	0	0	0	0	0	0	0	0	0	0	0	0	0	0	0	0	0	0	0	0	0	0	0	0	0	0	0	0	0
d__Eukaryota;p__Streptophyta;c__Magnoliopsida;o__Caryophyllales;f__Chenopodiaceae;g__Halogeton;s__Halogetonarachnoideus	0	0	0	0	0	0	0	0	0	0	0	0	0	0	0	0	0	0	0	0	0	0	0	0	0	0	0	0	0	0	0	0	0	0	0	0	0	0	0	0	0	0	0	0	0	0	0	0	0
d__Eukaryota;p__Streptophyta;c__Magnoliopsida;o__Lamiales;f__Paulowniaceae;g__Paulownia;s__Paulowniacoreana	0	0	0	0	0	0	0	0	0	0	0	0	0	0	0	0	0	0	0	0	0	0	0	0	0	0	0	0	0	0	0	0	0	0	0	0	0	0	0	0	0	0	0	0	0	0	0	0	0
d__Eukaryota;p__Streptophyta;c__Magnoliopsida;o__Malpighiales;f__Putranjivaceae;g__Lingelsheimia;s__Lingelsheimiasp.Rabenantoandroetal.1115	0	0	0	0	0	0	0	0	0	0	0	0	0	0	0	0	0	0	0	0	0	0	0	0	0	0	0	0	0	0	0	0	0	0	0	0	0	0	0	0	0	0	0	0	0	0	0	0	0
d__Eukaryota;p__Streptophyta;c__Magnoliopsida;o__Ericales;f__Theaceae;g__Camellia;s__Camelliasinensis	0	0	0	0	0	0	0	0	0	0	0	0	0	0	0	0	0	0	0	0	0	0	0	0	0	0	0	0	0	0	0	0	0	0	0	0	0	0	0	0	0	0	0	0	0	0	0	0	0
d__Eukaryota;p__Streptophyta;c__Magnoliopsida;o__Fabales;f__Fabaceae;g__Oxytropis;s__Oxytropispurpurea	0	0	0	0	0	0	0	0	0	0	0	0	0	0	0	0	0	0	0	0	0	0	0	0	0	0	0	0	0	0	0	0	0	0	0	0	0	0	0	0	0	0	0	0	0	0	0	0	0
d__Eukaryota;p__Streptophyta;c__Magnoliopsida;o__Rosales;f__Rosaceae;g__Potentilla;s__Potentillaconcinna	0	0	0	0	0	0	0	0	0	0	0	0	0	0	0	0	0	0	0	0	0	0	0	0	0	0	0	0	0	0	0	0	0	0	0	0	0	0	0	0	0	0	0	0	0	0	0	0	0
d__Eukaryota;p__Streptophyta;c__Magnoliopsida;o__Rosales;f__Rosaceae;g__Potentilla;s__Potentillastrigosa	0	0	0	0	0	0	0	0	0	0	0	0	0	0	0	0	0	0	0	0	0	0	0	0	0	0	0	0	0	0	0	0	0	0	0	0	0	0	0	0	0	0	0	0	0	0	0	0	0
d__Eukaryota;p__Streptophyta;c__Magnoliopsida;o__Rosales;f__Ulmaceae;g__Zelkova;s__Zelkovacarpinifolia	0	0	0	0	0	0	0	0	0	0	0	0	0	0	0	0	0	0	0	0	0	0	0	0	0	0	0	0	0	0	0	0	0	0	0	0	0	0	0	0	0	0	0	0	0	0	0	0	0
d__Eukaryota;p__Streptophyta;c__Magnoliopsida;o__Solanales;f__Convolvulaceae;g__Ipomoea;s__Ipomoearecta	0	0	0	0	0	0	0	0	0	0	0	0	0	0	0	0	0	0	0	0	0	0	0	0	0	0	0	0	0	0	0	0	0	0	0	0	0	0	0	0	0	0	0	0	0	0	0	0	0
d__Eukaryota;p__Streptophyta;c__Magnoliopsida;o__Asterales;f__Asteraceae;g__Smallanthus;s__Smallanthusmaculatus	0	0	0	0	0	0	0	0	0	0	0	0	0	0	0	0	0	0	0	0	0	0	0	0	0	0	0	0	0	0	0	0	0	0	0	0	0	0	0	0	0	0	0	0	0	0	0	0	0
d__Eukaryota;p__Streptophyta;c__Magnoliopsida;o__Gentianales;f__Rubiaceae;g__Ixora;s__Ixorachinensis	0	0	0	0	0	0	0	0	0	0	0	0	0	0	0	0	0	0	0	0	0	0	0	0	0	0	0	0	0	0	0	0	0	0	0	0	0	0	0	0	0	0	0	0	0	0	0	0	0
d__Eukaryota;p__Streptophyta;c__Magnoliopsida;o__Lamiales;f__Oleaceae;g__Fraxinus;s__Fraxinusinsularis	0	0	0	0	0	0	0	0	0	0	0	0	0	0	0	0	0	0	0	0	0	0	0	0	0	0	0	0	0	0	0	0	0	0	0	0	0	0	0	0	0	0	0	0	0	0	0	0	0
d__Eukaryota;p__Streptophyta;c__Magnoliopsida;o__Solanales;f__Solanaceae;g__Capsicum;s__Capsicumfrutescens	0	0	0	0	0	0	0	0	0	0	0	0	0	0	0	0	0	0	0	0	0	0	0	0	0	0	0	0	0	0	0	0	0	0	0	0	0	0	0	0	0	0	0	0	0	0	0	0	0
d__Eukaryota;p__Streptophyta;c__Magnoliopsida;o__Fabales;f__Fabaceae;g__Astragalus;s__Astragalussinicus	0	0	0	0	0	0	0	0	0	0	0	0	0	0	0	0	0	0	0	0	0	0	0	0	0	0	0	0	0	0	0	0	0	0	0	0	0	0	0	0	0	0	0	0	0	0	0	0	0
d__Eukaryota;p__Streptophyta;c__Magnoliopsida;o__Lamiales;f__Verbenaceae;g__Glandularia;s__Glandulariaguaranitica	0	0	0	0	0	0	0	0	0	0	0	0	0	0	0	0	0	0	5	0	14	0	0	0	0	0	0	0	0	0	0	0	0	0	0	0	0	0	0	0	0	0	0	0	0	0	0	0	0
d__Eukaryota;p__Streptophyta;c__Magnoliopsida;o__Rosales;f__Moraceae;g__Artocarpus;s__Artocarpusaltilis	0	0	0	0	0	0	0	0	0	0	0	0	0	0	0	0	0	0	0	0	0	0	0	0	0	0	0	0	0	0	0	0	0	0	0	0	0	0	0	0	0	0	0	0	0	0	0	0	0
d__Eukaryota;p__Streptophyta;c__Magnoliopsida;o__Rosales;f__Rosaceae;g__Potentilla;s__Potentillanivea	0	0	0	0	0	0	0	0	0	0	0	0	0	0	0	0	0	0	0	0	0	0	0	0	0	0	0	0	0	0	0	0	0	0	0	0	0	0	0	0	0	0	0	0	0	0	0	0	0
d__Eukaryota;p__Streptophyta;c__Magnoliopsida;o__Solanales;f__Convolvulaceae;g__Ipomoea;s__Ipomoeacordatotriloba	0	0	0	0	0	0	0	0	0	0	0	0	0	0	0	0	0	0	0	0	0	0	0	0	0	0	0	0	0	0	0	0	0	0	0	0	0	0	0	0	0	0	0	0	0	0	0	0	0
d__Eukaryota;p__Streptophyta;c__Magnoliopsida;o__Solanales;f__Solanaceae;g__Nicotiana;s__Nicotianakawakamii	0	0	0	0	0	0	0	0	0	0	0	0	0	0	0	0	0	0	0	0	0	0	0	0	0	0	0	0	0	0	0	0	0	0	0	0	0	0	0	0	0	0	0	0	0	0	0	0	0
d__Eukaryota;p__Streptophyta;c__Magnoliopsida;o__Caryophyllales;f__Caryophyllaceae;g__Gypsophila;s__Gypsophilauralensis	0	0	0	0	0	0	0	0	0	0	0	0	0	0	0	0	0	0	0	0	0	0	0	0	0	0	0	0	0	0	0	0	0	0	0	0	0	0	0	0	0	0	0	0	0	0	0	0	0
d__Eukaryota;p__Streptophyta;c__Magnoliopsida;o__Ericales;f__Theaceae;g__Camellia;s__Camelliamairei	0	0	0	0	0	0	0	0	0	0	0	0	0	0	0	0	0	0	0	0	0	0	0	0	0	0	0	0	0	0	0	0	0	0	0	0	0	0	0	0	0	0	0	0	0	0	0	0	0
d__Eukaryota;p__Streptophyta;c__Magnoliopsida;o__Ranunculales;f__Ranunculaceae;g__Clematis;s__Clematishexapetala	0	0	0	0	0	0	0	0	0	0	0	0	0	0	0	0	0	0	0	0	0	0	0	0	0	0	0	0	0	0	0	0	0	0	0	0	0	0	0	0	0	0	0	0	0	0	0	0	0
d__Eukaryota;p__Streptophyta;c__Magnoliopsida;o__Rosales;f__Rosaceae;g__Fragaria;s__Fragarianilgerrensis	0	0	0	0	0	0	0	0	0	0	0	0	0	0	0	0	0	0	0	0	0	0	0	0	0	0	0	0	0	0	0	0	0	0	0	0	0	0	0	0	0	0	0	0	0	0	0	0	0
d__Eukaryota;p__Streptophyta;c__Magnoliopsida;o__Asterales;f__Asteraceae;g__Artemisia;s__Artemisiaararatica	0	0	0	0	0	0	0	0	0	0	0	0	0	0	0	0	0	0	0	0	0	0	0	0	0	0	0	0	0	0	0	0	0	0	0	0	0	0	0	0	0	0	0	0	0	0	0	0	0
d__Eukaryota;p__Streptophyta;c__Magnoliopsida;o__Asterales;f__Asteraceae;g__Dahlia;s__Dahliacoccinea	0	0	0	0	0	0	0	0	0	0	0	0	0	0	0	0	0	0	0	0	0	0	0	0	0	0	0	0	0	0	0	0	0	0	0	0	0	0	0	0	0	0	0	0	0	0	0	0	0
d__Eukaryota;p__Streptophyta;c__Magnoliopsida;o__Caryophyllales;f__Chenopodiaceae;g__Grubovia;s__Gruboviadasyphylla	0	0	0	0	0	0	0	0	0	0	0	0	0	0	0	0	0	0	0	0	0	0	0	0	0	0	0	0	0	0	0	0	0	0	0	0	0	0	0	0	0	0	0	0	0	0	0	0	0
d__Eukaryota;p__Streptophyta;c__Magnoliopsida;o__Cornales;f__Hydrangeaceae;g__Hydrangea;s__Hydrangeapaniculata	0	0	0	0	0	0	0	0	0	0	0	0	0	0	0	0	0	0	0	0	0	0	0	0	0	0	0	0	0	0	0	0	0	0	0	0	0	0	0	0	0	0	0	0	0	0	0	0	0
d__Eukaryota;p__Streptophyta;c__Magnoliopsida;o__Dipsacales;f__Caprifoliaceae;g__Lonicera;s__Lonicerapilosa	0	0	0	0	0	0	0	0	0	0	0	0	0	0	0	0	0	0	0	0	0	0	0	0	0	0	0	0	0	0	0	0	0	0	0	0	0	0	0	0	0	0	0	0	0	0	0	0	0
d__Eukaryota;p__Streptophyta;c__Magnoliopsida;o__Fagales;f__Fagaceae;g__Castanea;s__Castaneacrenata	0	0	0	0	0	0	0	0	0	0	0	0	0	0	0	0	0	0	0	0	0	0	0	0	0	0	0	0	0	0	0	0	0	0	0	0	0	0	0	0	0	0	0	0	0	0	0	0	0
d__Eukaryota;p__Streptophyta;c__Magnoliopsida;o__Malpighiales;f__Phyllanthaceae;g__Flueggea;s__Flueggeavirosa	0	0	0	0	0	0	0	0	0	0	0	0	0	0	0	0	0	0	0	0	0	0	0	0	0	0	0	0	0	0	0	0	0	0	0	0	0	0	0	0	0	0	0	0	0	0	0	0	0
d__Eukaryota;p__Streptophyta;c__Magnoliopsida;o__Malpighiales;f__Salicaceae;g__Hemiscolopia;s__Hemiscolopiatrimera	0	0	0	0	0	0	0	0	0	0	0	0	0	0	0	0	0	0	0	0	0	0	0	0	0	0	0	0	0	0	0	0	0	0	0	0	0	0	0	0	0	0	0	0	0	0	0	0	0
d__Eukaryota;p__Streptophyta;c__Magnoliopsida;o__Poales;f__Poaceae;g__Beckmannia;s__Beckmanniasyzigachne	0	0	0	0	0	0	0	0	0	0	0	0	0	0	0	0	0	0	0	8	0	0	0	0	0	0	0	0	0	0	0	0	0	0	0	0	0	0	0	0	0	0	0	0	0	0	0	0	0
d__Eukaryota;p__Streptophyta;c__Magnoliopsida;o__Poales;f__Poaceae;g__Festuca;s__Festucafontqueriana	0	0	0	0	0	0	0	0	0	0	0	0	0	0	0	0	0	0	0	0	0	0	0	0	0	0	0	0	0	0	0	0	0	0	0	0	0	0	0	0	0	0	0	0	0	0	0	0	0
d__Eukaryota;p__Streptophyta;c__Magnoliopsida;o__Asterales;f__Asteraceae;g__Chrysanthemum;s__Chrysanthemumvestitum	0	0	0	0	0	0	0	0	0	0	0	0	0	0	0	0	0	0	0	0	0	0	0	0	0	0	0	0	0	0	0	0	0	0	0	0	0	0	0	0	0	0	0	0	0	0	0	0	0
d__Eukaryota;p__Streptophyta;c__Magnoliopsida;o__Asterales;f__Asteraceae;g__Dubyaea;s__Dubyaeablinii	0	0	0	0	0	0	0	0	0	0	0	0	0	0	0	0	0	0	0	0	0	0	0	0	0	0	0	0	0	0	0	0	0	0	0	0	0	0	0	0	0	0	0	0	0	0	0	0	0
d__Eukaryota;p__Streptophyta;c__Magnoliopsida;o__Asterales;f__Asteraceae;g__Oxytenia;s__Oxyteniaacerosa	0	0	0	0	0	0	0	0	0	0	0	0	0	0	0	0	0	0	0	0	0	0	0	0	0	0	0	0	0	0	0	0	0	0	0	0	0	0	0	0	0	0	0	0	0	0	0	0	0
d__Eukaryota;p__Streptophyta;c__Magnoliopsida;o__Caryophyllales;f__Chenopodiaceae;g__Atriplex;s__Atriplexcentralasiatica	0	0	0	0	0	0	0	0	0	0	0	0	0	0	0	0	0	0	0	0	0	0	0	0	0	0	0	0	0	0	0	0	0	0	0	0	0	0	0	0	0	0	0	0	9	0	0	0	0
d__Eukaryota;p__Streptophyta;c__Magnoliopsida;o__Caryophyllales;f__Chenopodiaceae;g__Corispermum;s__Corispermumamericanum	0	0	0	0	0	0	0	0	0	0	0	0	0	0	0	0	0	0	0	0	0	0	0	0	0	0	0	0	0	0	0	0	0	0	0	0	0	0	0	0	0	0	0	0	0	0	0	0	0
d__Eukaryota;p__Streptophyta;c__Magnoliopsida;o__Caryophyllales;f__Tamaricaceae;g__Tamarix;s__Tamarixhohenackeri	0	0	0	0	0	0	0	0	0	0	0	0	0	0	0	0	0	0	0	0	0	0	0	0	0	0	0	0	0	0	0	0	0	0	0	0	0	0	0	0	0	0	0	0	0	0	0	0	0
d__Eukaryota;p__Streptophyta;c__Magnoliopsida;o__Cucurbitales;f__Cucurbitaceae;g__Cucurbita;s__Cucurbitamaxima	0	0	0	0	0	0	0	0	0	0	0	0	0	0	0	0	0	0	0	0	0	0	0	0	0	0	0	0	0	0	0	0	0	0	0	0	0	0	0	0	0	0	0	0	0	0	0	0	0
d__Eukaryota;p__Streptophyta;c__Magnoliopsida;o__Ericales;f__Actinidiaceae;g__Actinidia;s__Actinidiaarguta	0	0	0	0	0	0	0	0	0	0	0	0	0	0	0	0	0	0	0	0	0	0	0	0	0	0	0	0	0	0	0	0	0	0	0	0	0	0	0	0	0	0	0	0	0	0	0	0	0
d__Eukaryota;p__Streptophyta;c__Magnoliopsida;o__Fagales;f__Juglandaceae;g__Juglans;s__Juglanscathayensis	0	0	0	0	0	0	0	0	0	0	0	0	0	0	0	0	0	0	0	0	0	0	0	0	0	0	0	0	0	0	0	0	0	0	0	0	0	0	0	0	0	0	0	0	0	0	0	0	0
d__Eukaryota;p__Streptophyta;c__Magnoliopsida;o__Malpighiales;f__Salicaceae;g__Salix;s__Salixpentandra	0	0	0	0	0	0	0	0	0	0	0	0	0	0	0	0	0	0	0	0	0	0	0	0	0	0	0	0	0	0	0	0	0	0	0	0	0	0	0	0	0	0	0	0	0	0	0	0	0
d__Eukaryota;p__Streptophyta;c__Magnoliopsida;o__Poales;f__Poaceae;g__Digitaria;s__Digitariavelutina	0	0	0	0	0	0	0	0	0	0	0	0	0	0	0	0	0	0	0	0	0	0	0	0	0	0	0	0	0	0	0	0	0	0	0	0	0	0	0	0	0	0	0	0	0	0	0	0	0
d__Eukaryota;p__Streptophyta;c__Magnoliopsida;o__Ranunculales;f__Ranunculaceae;g__Ranunculus;s__Ranunculusternatus	0	0	0	0	0	0	0	0	0	0	0	0	0	0	0	0	0	0	0	0	0	0	0	0	0	0	0	0	0	0	0	0	0	0	0	0	0	0	0	0	0	0	0	0	0	0	0	0	0
d__Eukaryota;p__Streptophyta;c__Magnoliopsida;o__Sapindales;f__Sapindaceae;g__Acer;s__Acerplatanoides	0	0	0	0	0	0	0	0	0	0	0	0	0	0	0	0	0	0	0	0	0	0	0	0	0	0	0	0	0	0	0	0	0	0	0	0	0	0	0	0	0	0	0	0	0	0	0	0	0
d__Eukaryota;p__Streptophyta;c__Magnoliopsida;o__Solanales;f__Solanaceae;g__Solanum;s__Solanumphysalifolium	0	0	0	0	0	0	0	0	0	0	0	0	0	0	0	0	0	0	0	0	0	0	0	0	0	0	0	0	0	0	0	0	0	0	0	0	0	0	0	0	0	0	0	0	0	0	0	0	0
d__Eukaryota;p__Streptophyta;c__Pinopsida;o__Cupressales;f__Taxaceae;g__Torreya;s__Torreyacalifornica	0	0	0	0	0	0	0	0	0	0	0	0	0	0	0	0	0	0	0	0	0	0	0	0	0	0	0	0	0	0	0	0	0	0	0	0	0	0	0	0	0	0	0	0	0	0	0	0	0
d__Eukaryota;p__Streptophyta;c__Magnoliopsida;o__Caryophyllales;f__Chenopodiaceae;g__Agriophyllum;s__Agriophyllumsquarrosum	0	0	0	0	0	0	0	0	0	0	0	0	0	0	0	0	0	0	0	0	0	0	0	0	0	0	0	0	0	0	0	0	0	0	0	0	0	0	0	0	0	0	0	0	0	0	0	0	0
d__Eukaryota;p__Streptophyta;c__Magnoliopsida;o__Cucurbitales;f__Cucurbitaceae;g__Luffa;s__Luffaacutangula	0	0	0	0	0	0	0	0	0	0	0	0	0	0	0	0	0	0	0	0	0	0	0	0	0	0	0	0	0	0	0	0	0	0	0	0	0	0	0	0	0	0	0	0	0	0	0	0	0
d__Eukaryota;p__Streptophyta;c__Magnoliopsida;o__Poales;f__Poaceae;g__Aegilops;s__Aegilopstauschii	0	0	0	0	0	0	0	0	0	0	0	0	0	0	0	0	0	0	0	0	0	0	0	0	0	0	0	0	0	0	6	0	0	1	0	0	0	0	0	0	0	0	0	0	0	0	0	0	0
d__Eukaryota;p__Streptophyta;c__Magnoliopsida;o__Santalales;f__Amphorogynaceae;g__Dendrotrophe;s__Dendrotrophevarians	0	0	0	0	0	0	0	0	0	0	0	0	0	0	0	0	0	0	0	0	0	0	0	0	0	0	0	0	0	0	0	0	0	0	0	0	0	0	0	0	0	0	0	0	0	0	0	0	0
d__Eukaryota;p__Streptophyta;c__Pinopsida;o__Pinales;f__Pinaceae;g__Pinus;s__Pinuskoraiensis	0	0	0	0	0	0	0	0	0	0	0	0	0	0	0	0	0	0	0	0	0	0	0	0	0	0	0	0	0	0	0	0	0	0	0	0	0	0	0	0	0	0	0	0	0	0	0	0	0
d__Eukaryota;p__Streptophyta;c__Magnoliopsida;o__Alismatales;f__Potamogetonaceae;g__Stuckenia;s__Stuckeniafiliformis	0	0	0	0	0	0	0	0	0	0	0	0	0	0	0	0	0	0	0	0	0	0	0	0	0	0	0	0	0	0	0	0	0	0	0	0	0	0	0	0	0	0	0	0	0	0	0	0	0
d__Eukaryota;p__Streptophyta;c__Magnoliopsida;o__Apiales;f__Apiaceae;g__Ledebouriella;s__Ledebouriellaseseloides	0	0	0	0	0	0	0	0	0	0	0	0	0	0	0	0	0	0	0	0	0	0	0	0	0	0	0	0	0	0	0	0	0	0	0	0	0	0	0	0	0	0	0	0	0	0	0	0	0
d__Eukaryota;p__Streptophyta;c__Magnoliopsida;o__Apiales;f__Apiaceae;g__Peucedanum;s__Peucedanumterebinthaceum	0	0	0	0	0	0	0	0	0	0	0	0	0	0	0	0	0	0	8	0	0	0	0	0	0	0	0	0	0	0	0	0	0	0	0	0	0	0	0	0	0	0	0	0	0	0	0	0	0
d__Eukaryota;p__Streptophyta;c__Magnoliopsida;o__Cucurbitales;f__Cucurbitaceae;g__Cionosicys;s__Cionosicyspomiformis	0	0	0	0	0	0	0	0	0	0	0	0	0	0	0	0	0	0	0	0	0	0	0	0	0	0	0	0	0	0	0	0	0	0	0	0	0	0	0	0	0	0	0	0	0	0	0	0	0
d__Eukaryota;p__Streptophyta;c__Magnoliopsida;o__Fabales;f__Fabaceae;g__Lespedeza;s__Lespedezadavurica	0	0	0	0	0	0	0	0	0	0	0	0	0	0	0	0	0	0	0	0	0	0	0	0	0	0	0	0	0	0	0	0	0	0	0	0	0	0	0	0	0	0	0	0	0	0	0	0	0
d__Eukaryota;p__Streptophyta;c__Magnoliopsida;o__Lamiales;f__Oleaceae;g__Ligustrum;s__Ligustrumsinense	0	0	0	0	0	0	0	0	0	0	0	0	0	0	0	0	0	0	0	0	0	0	0	0	0	0	0	0	0	0	0	0	0	0	0	0	0	0	0	0	0	0	0	0	0	0	0	0	0
d__Eukaryota;p__Streptophyta;c__Magnoliopsida;o__Ranunculales;f__Ranunculaceae;g__Thalictrum;s__Thalictrumactaeifolium	0	0	0	0	0	0	0	0	0	0	0	0	0	0	0	0	0	0	0	0	0	0	0	0	0	0	0	0	0	0	0	0	0	0	0	0	0	0	0	0	0	0	0	0	0	0	0	0	0
d__Eukaryota;p__Streptophyta;c__Magnoliopsida;o__Ranunculales;f__Ranunculaceae;g__Thalictrum;s__Thalictrumbrevisericeum	0	0	0	0	0	0	0	0	0	0	0	0	0	0	0	0	0	0	0	0	0	0	0	0	0	0	0	0	0	0	0	0	0	0	0	0	0	0	0	0	0	0	0	0	0	0	0	0	0
d__Eukaryota;p__Streptophyta;c__Magnoliopsida;o__Ranunculales;f__Ranunculaceae;g__Thalictrum;s__Thalictrumichangense	0	0	0	0	0	0	0	0	0	0	0	0	0	0	0	0	0	0	0	0	0	0	0	0	0	0	0	0	0	0	0	0	0	0	0	0	0	0	0	0	0	0	0	0	0	0	0	0	0
d__Eukaryota;p__Streptophyta;c__Magnoliopsida;o__Rosales;f__Moraceae;g__Ficus;s__Ficuseumorpha	0	0	0	0	0	0	0	0	0	0	0	0	0	0	0	0	0	0	0	0	0	0	0	0	0	0	0	0	0	0	0	0	0	0	0	0	0	0	0	0	0	0	0	0	0	0	0	0	0
d__Eukaryota;p__Streptophyta;c__Magnoliopsida;o__Asterales;f__Asteraceae;g__Chrysanthemum;s__Chrysanthemumxmorifolium	0	0	0	0	0	0	0	0	0	0	0	0	0	0	0	0	0	0	0	0	0	0	0	0	0	0	0	0	0	0	0	0	0	0	0	0	0	0	0	0	0	0	0	0	0	0	0	0	0
d__Eukaryota;p__Streptophyta;c__Magnoliopsida;o__Asterales;f__Asteraceae;g__Taraxacum;s__Taraxacumcarneocoloratum	0	0	0	0	0	0	0	0	0	0	0	0	0	0	0	0	0	0	0	0	0	0	0	0	0	0	0	0	0	0	0	0	0	0	0	0	0	0	0	0	0	0	0	0	0	0	0	0	0
d__Eukaryota;p__Streptophyta;c__Magnoliopsida;o__Asterales;f__Campanulaceae;g__Codonopsis;s__Codonopsispilosula	0	0	0	0	0	0	0	0	0	0	0	0	0	0	0	0	0	0	0	0	0	0	0	0	0	0	0	0	0	0	0	0	0	0	0	0	0	0	0	0	0	0	0	0	0	0	0	0	0
d__Eukaryota;p__Streptophyta;c__Magnoliopsida;o__Boraginales;f__Boraginaceae;g__Thyrocarpus;s__Thyrocarpussampsonii	0	0	0	0	0	0	0	0	0	0	0	0	0	0	0	0	0	0	0	0	0	0	0	0	0	0	0	0	0	0	0	0	0	0	0	0	0	0	0	0	0	0	0	0	0	0	0	0	0
d__Eukaryota;p__Streptophyta;c__Magnoliopsida;o__Caryophyllales;f__Amaranthaceae;g__Ouret;s__Ouretlanata	0	0	0	0	0	0	0	0	0	0	0	0	0	0	0	0	0	0	0	0	0	0	0	0	0	0	0	0	0	0	0	0	0	0	0	0	0	0	0	0	0	0	0	0	0	0	0	0	0
d__Eukaryota;p__Streptophyta;c__Magnoliopsida;o__Caryophyllales;f__Chenopodiaceae;g__Krascheninnikovia;s__Krascheninnikovialenensis	0	0	0	0	0	0	0	0	0	0	0	0	0	0	0	0	0	0	0	0	0	0	0	0	0	0	0	0	0	0	0	0	0	0	0	0	0	0	0	0	0	0	0	0	0	0	0	0	0
d__Eukaryota;p__Streptophyta;c__Magnoliopsida;o__Celastrales;f__Celastraceae;g__Tripterygium;s__Tripterygiumwilfordii	0	0	0	0	0	0	0	0	0	0	0	0	0	0	0	0	0	0	0	0	0	0	0	0	0	0	0	0	0	0	0	0	0	0	0	0	0	0	0	0	0	0	0	0	0	0	0	0	0
d__Eukaryota;p__Streptophyta;c__Magnoliopsida;o__Ericales;f__Ebenaceae;g__Diospyros;s__Diospyrossp.YX-2018	0	0	0	0	0	0	0	0	0	0	0	0	0	0	0	0	0	0	0	0	0	0	0	0	0	0	0	0	0	0	0	0	0	0	0	0	0	0	0	0	0	0	0	0	0	0	0	0	0
d__Eukaryota;p__Streptophyta;c__Magnoliopsida;o__Ranunculales;f__Papaveraceae;g__Papaver;s__Papavernudicaule	0	0	0	0	0	0	0	0	0	0	0	0	0	0	0	0	0	0	0	0	0	0	0	0	0	0	0	0	0	0	0	0	0	0	0	0	0	0	0	0	0	0	0	0	0	0	0	0	0
d__Eukaryota;p__Streptophyta;c__Magnoliopsida;o__Rosales;f__Rhamnaceae;g__Sageretia;s__Sageretiapaucicostata	0	0	0	0	0	0	0	0	0	0	0	0	0	0	0	0	0	0	0	0	0	0	0	0	0	0	0	0	0	0	0	0	0	0	0	0	0	0	0	0	0	0	0	0	0	0	0	0	0
d__Eukaryota;p__Streptophyta;c__Magnoliopsida;o__Sapindales;f__Anacardiaceae;g__Rhus;s__Rhustyphina	0	0	0	0	0	0	0	0	0	0	0	0	0	0	0	0	0	0	0	0	0	0	0	0	0	0	0	0	0	0	0	0	0	0	0	0	0	0	0	0	0	0	0	0	0	0	0	0	0
d__Eukaryota;p__Streptophyta;c__Magnoliopsida;o__Caryophyllales;f__Polygonaceae;g__Persicaria;s__Persicariatinctoria	0	0	0	0	0	0	0	0	0	0	0	0	0	0	0	0	0	0	0	0	0	0	0	0	0	0	0	0	0	0	0	0	0	0	0	0	0	0	0	0	0	0	0	0	0	0	0	0	0
d__Eukaryota;p__Streptophyta;c__Magnoliopsida;o__Caryophyllales;f__Polygonaceae;g__Rumex;s__Rumexpulcher	0	0	0	0	0	0	0	0	0	0	0	0	0	0	0	0	0	0	0	0	0	0	0	0	0	0	0	0	1	0	0	0	0	7	0	0	0	0	0	0	0	0	0	0	0	0	0	0	0
d__Eukaryota;p__Streptophyta;c__Magnoliopsida;o__Poales;f__Poaceae;g__Setaria;s__Setariapumila	0	0	0	0	0	0	0	0	0	0	0	0	0	0	0	0	0	0	0	0	0	0	0	0	0	0	0	0	0	0	0	0	0	0	0	0	0	0	0	0	0	0	0	0	0	0	0	0	0
d__Eukaryota;p__Streptophyta;c__Magnoliopsida;o__Rosales;f__Moraceae;g__Ficus;s__Ficuscarica	0	0	0	0	0	0	0	0	0	0	0	0	0	0	0	0	0	0	0	0	0	0	0	0	0	0	0	0	0	0	0	0	0	0	0	0	0	0	0	0	0	0	0	0	0	0	0	0	0
d__Eukaryota;p__Streptophyta;c__Magnoliopsida;o__Rosales;f__Rosaceae;g__Drymocallis;s__Drymocallisdeseretica	0	0	0	0	0	0	0	0	0	0	0	0	0	0	0	0	0	0	0	0	0	0	0	0	0	0	0	0	0	0	0	0	0	0	0	0	0	0	0	0	0	0	0	0	0	0	0	0	0
d__Eukaryota;p__Streptophyta;c__Magnoliopsida;o__Rosales;f__Rosaceae;g__Potentilla;s__Potentillareptans	0	0	0	0	0	0	0	0	0	0	0	0	0	0	0	0	0	0	0	0	0	0	0	0	0	0	0	0	0	0	0	0	0	0	0	0	0	0	0	0	0	0	0	0	0	0	0	0	0
d__Eukaryota;p__Streptophyta;c__Magnoliopsida;o__Rosales;f__Ulmaceae;g__Ulmus;s__Ulmusbergmanniana	0	0	0	0	0	0	0	0	0	0	0	0	0	0	0	0	0	0	0	0	0	0	0	0	0	0	0	0	0	0	0	0	0	0	0	0	0	0	0	0	0	0	0	0	0	0	0	0	0
d__Eukaryota;p__Streptophyta;c__Magnoliopsida;o__Alismatales;f__Potamogetonaceae;g__Stuckenia;s__StuckeniafiliformisxStuckeniavaginata	0	0	0	0	0	0	0	0	0	0	0	0	0	0	0	0	0	0	0	0	0	0	0	0	0	0	0	0	0	0	0	0	0	0	0	0	0	0	0	0	0	0	0	0	0	0	0	0	0
d__Eukaryota;p__Streptophyta;c__Magnoliopsida;o__Asterales;f__Asteraceae;g__Crepidiastrum;s__Crepidiastrumplatyphyllum	0	0	0	0	0	0	0	0	0	0	0	0	0	0	0	0	0	0	0	0	0	0	0	0	0	0	0	0	0	0	0	0	0	0	0	0	0	0	0	0	0	0	0	0	0	0	0	0	0
d__Eukaryota;p__Streptophyta;c__Magnoliopsida;o__Fagales;f__Betulaceae;g__Alnus;s__Alnuscordata	0	0	0	0	0	0	0	0	0	0	0	0	0	0	0	0	0	0	0	0	0	0	0	0	0	0	0	0	0	0	0	0	0	0	0	0	0	0	0	0	0	0	0	0	0	0	0	0	0
d__Eukaryota;p__Streptophyta;c__Magnoliopsida;o__Rosales;f__Cannabaceae;g__Humulus;s__Humuluslupulus	0	0	0	0	0	0	0	0	0	0	0	0	0	0	0	0	0	0	0	0	0	0	0	0	0	0	0	0	0	0	0	0	0	0	0	0	0	0	0	0	0	0	0	0	0	0	0	0	0
d__Eukaryota;p__Streptophyta;c__Magnoliopsida;o__Rosales;f__Rosaceae;g__Malus;s__Malusbaccata	0	0	0	0	0	0	0	0	0	0	0	0	0	0	0	0	0	0	0	0	0	0	0	0	0	0	0	0	0	0	0	0	0	0	0	0	0	0	0	0	0	0	0	0	0	0	0	0	0
d__Eukaryota;p__Streptophyta;c__Magnoliopsida;o__Solanales;f__Solanaceae;g__Capsicum;s__Capsicumlycianthoides	0	0	0	0	0	0	0	0	0	0	0	0	0	0	0	0	0	0	0	0	0	0	0	0	0	0	0	0	0	0	0	0	0	0	0	0	0	0	0	0	0	0	0	0	0	0	0	0	0
d__Eukaryota;p__Streptophyta;c__Magnoliopsida;o__Apiales;f__Apiaceae;g__Pachypleurum;s__Pachypleurumxizangense	0	0	0	0	0	0	0	0	0	0	0	0	0	0	0	1	0	0	0	0	0	0	0	0	0	0	0	0	0	0	0	0	0	0	0	0	0	0	0	0	0	0	0	0	0	0	0	0	0
d__Eukaryota;p__Streptophyta;c__Magnoliopsida;o__Asterales;f__Asteraceae;g__Ursinia;s__Ursiniaanthemoides	0	0	0	0	0	0	0	0	0	0	0	0	0	0	0	0	0	0	0	0	0	0	0	0	0	0	0	0	0	0	0	0	0	0	0	0	0	0	0	0	0	0	0	0	0	0	0	0	0
d__Eukaryota;p__Streptophyta;c__Magnoliopsida;o__Boraginales;f__Boraginaceae;g__Nihon;s__Nihonjaponicum	0	0	0	0	0	0	0	0	0	0	0	0	0	0	0	0	0	0	0	0	0	0	0	0	0	0	0	0	0	0	0	0	0	0	0	0	0	0	0	0	0	0	0	0	0	0	0	0	0
d__Eukaryota;p__Streptophyta;c__Magnoliopsida;o__Brassicales;f__Brassicaceae;g__Spryginia;s__Spryginiafalcata	0	0	0	0	0	0	0	0	0	0	0	0	0	0	0	0	0	0	0	0	0	0	0	0	0	0	0	0	0	0	0	0	0	0	0	0	0	0	0	0	0	0	0	0	0	0	0	0	0
d__Eukaryota;p__Streptophyta;c__Magnoliopsida;o__Caryophyllales;f__Caryophyllaceae;g__Gypsophila;s__Gypsophilapacifica	0	0	0	0	0	0	0	0	0	0	0	0	0	0	0	0	0	0	0	0	0	0	0	0	0	0	0	0	0	0	0	0	0	0	0	0	0	0	0	0	0	0	0	0	0	0	0	0	0
d__Eukaryota;p__Streptophyta;c__Magnoliopsida;o__Fabales;f__Fabaceae;g__Alhagi;s__Alhagisparsifolia	0	0	0	0	0	0	0	0	0	0	0	7	0	0	0	0	0	0	0	0	0	0	0	0	0	0	0	0	0	0	0	0	0	0	0	0	0	0	0	0	0	0	0	0	0	0	0	0	0
d__Eukaryota;p__Streptophyta;c__Magnoliopsida;o__Fagales;f__Betulaceae;g__Betula;s__Betulalenta	0	0	0	0	0	0	0	0	0	0	0	0	0	0	0	0	0	0	0	0	0	0	0	0	0	0	0	0	0	0	0	0	0	0	0	0	0	0	0	0	0	0	0	0	0	0	0	0	0
d__Eukaryota;p__Streptophyta;c__Magnoliopsida;o__Fagales;f__Fagaceae;g__Fagus;s__Fagussylvatica	0	0	0	0	0	0	0	0	0	0	0	0	0	0	0	0	0	0	0	0	0	0	0	0	0	0	0	0	0	0	0	0	0	0	0	0	0	0	0	0	0	0	0	0	0	0	0	0	0
d__Eukaryota;p__Streptophyta;c__Magnoliopsida;o__Ranunculales;f__Ranunculaceae;g__Clematis;s__Clematisgratopsis	0	0	0	0	0	0	0	0	0	0	0	0	0	0	0	0	0	0	0	0	0	0	0	0	0	0	0	0	0	0	0	0	0	0	0	0	0	0	0	0	0	0	0	0	0	0	0	0	0
d__Eukaryota;p__Streptophyta;c__Magnoliopsida;o__Rosales;f__Rhamnaceae;g__Ziziphus;s__Ziziphusmauritiana	0	0	0	0	0	0	0	0	0	0	0	0	0	0	0	0	0	0	0	0	0	0	0	0	0	0	0	0	0	0	0	0	0	0	0	0	0	0	0	0	0	0	0	0	0	0	0	0	0
d__Eukaryota;p__Streptophyta;c__Magnoliopsida;o__Rosales;f__Rosaceae;g__Cliffortia;s__Cliffortiacrenata	0	0	0	0	0	0	0	0	0	0	0	0	0	0	0	0	0	0	0	0	0	0	0	0	0	0	0	0	0	0	0	0	0	0	0	0	0	0	0	0	0	0	0	0	0	0	0	0	0
d__Eukaryota;p__Streptophyta;c__Magnoliopsida;o__Rosales;f__Rosaceae;g__Crataegus;s__Crataegushupehensis	0	0	0	0	0	0	0	0	0	0	0	0	0	0	0	0	0	0	0	0	0	0	0	0	0	0	0	0	0	0	0	0	0	0	0	0	0	0	0	0	0	0	0	0	0	0	0	0	0
d__Eukaryota;p__Streptophyta;c__Magnoliopsida;o__Sapindales;f__Anacardiaceae;g__Rhus;s__Rhuschinensis	0	0	0	0	0	0	0	0	0	0	0	0	0	0	0	0	0	0	0	0	0	0	0	0	0	0	0	0	0	0	0	0	0	0	0	0	0	0	0	0	0	0	0	0	0	0	0	0	0
d__Eukaryota;p__Streptophyta;c__Pinopsida;o__Pinales;f__Pinaceae;g__Pinus;s__Pinusresinosa	0	0	0	0	0	0	0	0	0	0	0	0	0	0	0	0	0	0	0	0	0	0	0	0	0	0	0	0	0	0	0	0	0	0	0	0	0	0	0	0	0	0	0	0	0	0	0	0	0
d__Eukaryota;p__Streptophyta;c__Magnoliopsida;o__Apiales;f__Apiaceae;g__Peucedanum;s__Peucedanumjaponicum	0	0	0	0	0	0	0	0	0	0	0	0	0	0	0	0	0	0	0	0	0	0	0	0	0	0	0	0	0	0	0	0	0	0	0	0	0	0	0	0	0	0	0	0	0	0	0	0	0
d__Eukaryota;p__Streptophyta;c__Magnoliopsida;o__Asterales;f__Asteraceae;g__Ambrosia;s__Ambrosiamaritima	0	0	0	0	0	0	0	0	0	0	0	0	0	0	0	0	0	0	0	0	0	0	0	0	0	0	0	0	0	0	0	0	0	0	0	0	0	0	0	0	0	0	0	0	0	0	0	0	0
d__Eukaryota;p__Streptophyta;c__Magnoliopsida;o__Brassicales;f__Brassicaceae;g__Erysimum;s__Erysimumincanum	0	0	0	0	0	0	0	0	0	0	0	0	0	0	0	0	0	0	0	0	0	0	0	0	0	0	0	0	0	0	0	0	0	0	0	0	0	0	0	0	0	0	0	0	0	0	0	0	0
d__Eukaryota;p__Streptophyta;c__Magnoliopsida;o__Caryophyllales;f__Chenopodiaceae;g__Bassia;s__Bassiastellaris	0	0	0	0	0	0	0	0	0	0	0	0	0	0	0	0	0	0	0	0	0	0	0	0	0	0	0	0	0	0	0	0	0	0	0	0	0	0	0	0	0	0	0	0	0	0	0	0	0
d__Eukaryota;p__Streptophyta;c__Magnoliopsida;o__Cornales;f__Hydrangeaceae;g__Philadelphus;s__Philadelphuscalvescens	0	0	0	0	0	0	0	0	0	0	0	0	0	0	0	0	0	0	0	0	0	0	0	0	0	0	0	0	0	0	0	0	0	0	0	0	0	0	0	0	0	0	0	0	0	0	0	0	0
d__Eukaryota;p__Streptophyta;c__Magnoliopsida;o__Ericales;f__Primulaceae;g__Androsace;s__Androsaceumbellata	0	0	0	0	0	0	0	0	0	0	0	0	0	0	0	0	0	0	0	0	0	0	0	0	0	0	0	0	0	0	0	0	0	0	0	0	0	0	0	0	0	0	0	0	0	0	0	0	0
d__Eukaryota;p__Streptophyta;c__Magnoliopsida;o__Lamiales;f__Acanthaceae;g__Asystasia;s__Asystasiagangetica	0	0	0	0	0	0	0	0	0	0	0	0	0	0	0	0	0	0	0	0	0	0	0	0	0	0	0	0	0	0	0	0	0	0	0	0	0	0	0	0	0	0	0	0	0	0	0	0	0
d__Eukaryota;p__Streptophyta;c__Magnoliopsida;o__Rosales;f__Rosaceae;g__Drymocallis;s__Drymocallisglandulosa	0	0	0	0	0	0	0	0	0	0	0	0	0	0	0	0	0	0	0	0	0	0	0	0	0	0	0	0	0	0	0	0	0	0	0	0	0	0	0	0	0	0	0	0	0	0	0	0	0
d__Eukaryota;p__Streptophyta;c__Magnoliopsida;o__Rosales;f__Rosaceae;g__Fragaria;s__Fragariaxananassa	0	0	0	0	0	0	0	0	0	0	0	0	0	0	0	0	0	0	0	0	0	0	0	0	0	0	0	0	0	0	0	0	0	0	0	0	0	0	0	0	0	0	0	0	0	0	0	0	0
d__Eukaryota;p__Streptophyta;c__Pinopsida;o__Pinales;f__Pinaceae;g__Abies;s__Abiesfabri	0	0	0	0	0	0	0	0	0	0	0	0	0	0	0	0	0	0	0	0	0	0	0	0	0	0	0	0	0	0	0	0	0	0	0	0	0	0	0	0	0	0	0	0	0	0	0	0	0
d__Eukaryota;p__Streptophyta;c__Magnoliopsida;o__Asterales;f__Asteraceae;g__Artemisia;s__Artemisiabaxoiensis	0	0	0	0	0	0	0	0	0	0	0	0	0	0	0	0	0	0	0	0	0	0	0	0	0	0	0	0	0	0	0	0	0	0	0	0	0	0	0	0	0	0	0	0	0	0	0	0	0
d__Eukaryota;p__Streptophyta;c__Magnoliopsida;o__Asterales;f__Asteraceae;g__Sonchus;s__Sonchusarvensis	0	0	0	0	0	0	0	0	0	0	0	0	0	0	0	0	0	0	0	0	0	0	0	0	0	0	0	0	0	0	0	0	1	0	0	0	0	0	0	0	0	0	0	0	0	0	0	0	0
d__Eukaryota;p__Streptophyta;c__Magnoliopsida;o__Asterales;f__Asteraceae;g__Zinnia;s__Zinniaelegans	0	0	0	0	0	0	0	0	0	0	0	0	0	0	0	0	0	0	0	0	0	0	0	0	0	0	0	0	0	0	0	0	0	0	0	0	0	0	0	0	0	0	0	0	0	0	0	0	0
d__Eukaryota;p__Streptophyta;c__Magnoliopsida;o__Boraginales;f__Boraginaceae;g__Oreocarya;s__Oreocaryacelosioides	0	0	0	0	0	0	0	0	0	0	0	0	0	0	0	0	0	0	0	0	0	0	0	0	0	0	0	0	0	0	0	0	0	0	0	0	0	0	0	0	0	0	0	0	0	0	0	0	0
d__Eukaryota;p__Streptophyta;c__Magnoliopsida;o__Brassicales;f__Brassicaceae;g__Erysimum;s__Erysimumangustatum	0	0	0	0	0	0	0	0	0	0	0	0	0	0	0	0	0	0	0	0	0	0	0	0	0	0	0	0	0	0	0	0	0	0	0	0	0	0	0	0	0	0	0	0	0	0	0	0	0
d__Eukaryota;p__Streptophyta;c__Magnoliopsida;o__Celastrales;f__Celastraceae;g__Celastrus;s__Celastrusglaucophyllus	0	0	0	0	0	0	0	0	0	0	0	0	0	0	0	0	0	0	0	0	0	0	0	0	0	0	0	0	0	0	0	0	0	0	0	0	0	0	0	0	0	0	0	0	0	0	0	0	0
d__Eukaryota;p__Streptophyta;c__Magnoliopsida;o__Lamiales;f__Lamiaceae;g__Mosla;s__Moslachinensis	0	0	0	0	0	0	0	0	0	0	0	0	0	0	0	0	0	0	0	0	0	0	0	0	0	0	0	0	0	0	0	0	0	0	0	0	0	0	0	0	0	0	0	0	0	0	0	0	0
d__Eukaryota;p__Streptophyta;c__Magnoliopsida;o__Lamiales;f__Lamiaceae;g__Salvia;s__Salviareuteriana	0	0	0	0	0	0	0	0	0	0	0	0	0	0	0	0	0	0	0	0	0	0	0	0	0	0	0	0	0	0	0	0	0	0	0	0	0	0	0	0	0	0	0	0	0	0	0	0	0
d__Eukaryota;p__Streptophyta;c__Magnoliopsida;o__Lamiales;f__Lamiaceae;g__Scutellaria;s__Scutellariaknorringiae	0	0	0	0	0	0	0	0	0	0	0	0	0	0	0	0	0	0	0	0	0	0	0	0	0	0	0	0	0	0	0	0	0	0	0	0	0	0	0	0	0	0	0	0	0	0	0	0	0
d__Eukaryota;p__Streptophyta;c__Magnoliopsida;o__Malvales;f__Malvaceae;g__Thespesia;s__Thespesiadanis	0	0	0	0	0	0	0	0	0	0	0	0	0	0	0	0	0	0	0	0	0	0	0	0	0	0	0	0	0	0	0	0	0	0	0	0	0	0	0	0	0	0	0	0	0	0	0	0	0
d__Eukaryota;p__Streptophyta;c__Magnoliopsida;o__Poales;f__Poaceae;g__Agrostis;s__Agrostisgigantea	0	0	0	0	0	0	0	0	0	0	0	0	0	8	0	0	0	0	0	0	0	0	0	0	0	0	0	0	0	0	0	0	0	0	0	0	0	0	0	0	0	0	0	0	0	0	0	0	0
d__Eukaryota;p__Streptophyta;c__Magnoliopsida;o__Rosales;f__Rosaceae;g__Pyrus;s__Pyruscommunis	0	0	0	0	0	0	0	0	0	0	0	0	0	0	0	0	0	0	0	0	0	0	0	0	0	0	0	0	0	0	0	0	0	0	0	0	0	0	0	0	0	0	0	0	0	0	0	0	0
d__Eukaryota;p__Streptophyta;c__Magnoliopsida;o__Rosales;f__Rosaceae;g__Spiraea;s__Spiraeamyrtilloides	0	0	0	0	0	0	0	0	0	0	0	0	0	0	0	0	0	0	0	0	0	0	0	0	0	0	0	0	0	0	0	0	0	0	0	0	0	0	0	0	0	0	0	0	0	0	0	0	0
d__Eukaryota;p__Streptophyta;c__Magnoliopsida;o__Solanales;f__Convolvulaceae;g__Convolvulus;s__Convolvulusammannii	0	0	0	0	0	0	0	0	0	0	0	0	0	0	0	0	0	0	0	0	0	0	0	0	0	0	0	0	0	0	0	0	0	0	0	0	0	0	0	0	0	0	0	0	0	0	0	0	0
d__Eukaryota;p__Streptophyta;c__Pinopsida;o__Pinales;f__Pinaceae;g__Pinus;s__Pinusalbicaulis	0	0	0	0	0	0	0	0	0	0	0	0	0	0	0	0	0	0	0	0	0	0	0	0	0	0	0	0	0	0	0	0	0	0	0	0	0	0	0	0	0	0	0	0	0	0	0	0	0
d__Eukaryota;p__Streptophyta;c__Magnoliopsida;o__Apiales;f__Apiaceae;g__Zizia;s__Ziziaaurea	0	0	0	0	0	0	0	0	0	0	0	0	0	0	0	0	1	0	1	0	0	0	0	0	0	0	0	0	0	0	0	0	0	0	0	0	0	0	0	0	0	0	0	0	0	0	0	0	0
d__Eukaryota;p__Streptophyta;c__Magnoliopsida;o__Asterales;f__Asteraceae;g__Chrysanthemum;s__Chrysanthemumrhombifolium	0	0	0	0	0	0	0	0	0	0	0	0	0	0	0	0	0	0	0	0	0	0	0	0	0	0	0	0	0	0	0	0	0	0	0	0	0	0	0	0	0	0	0	0	0	0	0	0	0
d__Eukaryota;p__Streptophyta;c__Magnoliopsida;o__Asterales;f__Asteraceae;g__Inula;s__Inulalinariifolia	0	0	0	0	0	0	0	0	0	0	0	0	0	0	0	0	0	0	0	0	0	0	0	0	0	0	0	0	0	0	0	0	0	0	0	0	0	0	0	0	0	0	0	0	0	0	0	0	0
d__Eukaryota;p__Streptophyta;c__Magnoliopsida;o__Asterales;f__Asteraceae;g__Pseudognaphalium;s__Pseudognaphaliumaffine	0	0	0	0	0	0	0	0	0	0	0	0	0	0	0	0	0	6	0	1	0	0	0	0	0	0	0	0	0	0	0	0	0	0	0	0	0	0	0	0	0	0	0	0	0	0	0	0	0
d__Eukaryota;p__Streptophyta;c__Magnoliopsida;o__Asterales;f__Asteraceae;g__Tanacetum;s__Tanacetumparadoxum	0	0	0	0	0	0	0	0	0	0	0	0	0	0	0	0	0	0	0	0	0	0	0	0	0	0	0	0	0	0	0	0	0	0	0	0	0	0	0	0	0	0	0	0	0	0	0	0	0
d__Eukaryota;p__Streptophyta;c__Magnoliopsida;o__Caryophyllales;f__Caryophyllaceae;g__Sabulina;s__Sabulinamacra	0	0	0	0	0	0	0	0	0	0	0	0	0	0	0	0	0	0	0	0	0	0	0	0	0	0	0	0	0	0	0	0	0	0	0	0	0	0	0	0	0	0	0	0	0	0	0	0	0
d__Eukaryota;p__Streptophyta;c__Magnoliopsida;o__Caryophyllales;f__Chenopodiaceae;g__Chenopodium;s__Chenopodiumalbum	0	0	0	0	0	0	0	0	0	0	0	0	0	0	0	0	0	0	0	0	0	0	0	0	0	0	0	0	0	0	0	0	0	0	0	0	0	0	0	0	0	0	0	0	0	0	0	0	0
d__Eukaryota;p__Streptophyta;c__Magnoliopsida;o__Caryophyllales;f__Chenopodiaceae;g__Petrosimonia;s__Petrosimonianigdeensis	0	0	0	0	0	0	0	0	0	0	0	0	0	0	0	0	0	0	0	0	0	0	0	0	0	0	0	0	0	0	0	0	0	0	0	0	0	0	0	0	0	0	0	0	0	0	0	0	0
d__Eukaryota;p__Streptophyta;c__Magnoliopsida;o__Cucurbitales;f__Cucurbitaceae;g__Cucurbita;s__Cucurbitamoschata	0	0	0	0	0	0	0	0	0	0	0	0	0	0	0	0	0	0	0	0	0	0	0	0	0	0	0	0	0	0	0	0	0	0	0	0	0	0	0	0	0	0	0	0	0	0	0	0	0
d__Eukaryota;p__Streptophyta;c__Magnoliopsida;o__Ericales;f__Ericaceae;g__Erica;s__Ericaabietina	0	0	0	0	0	0	0	0	0	0	0	0	0	0	0	0	0	0	0	0	0	0	0	0	0	0	0	0	0	0	0	0	0	0	0	0	0	0	0	0	0	0	0	0	0	0	0	0	0
d__Eukaryota;p__Streptophyta;c__Magnoliopsida;o__Ericales;f__Symplocaceae;g__Symplocos;s__Symplocospaniculata	0	0	0	0	0	0	0	0	0	0	0	0	0	0	0	0	0	0	0	0	0	0	0	0	0	0	0	0	0	0	0	0	0	0	0	0	0	0	0	0	0	0	0	0	0	0	0	0	0
d__Eukaryota;p__Streptophyta;c__Magnoliopsida;o__Fabales;f__Fabaceae;g__Amorpha;s__Amorphanana	0	0	0	0	0	0	0	0	0	0	0	0	0	0	0	0	0	0	0	0	0	0	0	0	0	0	0	0	0	0	0	0	0	0	0	0	0	0	0	0	0	0	0	0	0	0	0	0	0
d__Eukaryota;p__Streptophyta;c__Magnoliopsida;o__Fabales;f__Fabaceae;g__Eysenhardtia;s__Eysenhardtiaorthocarpa	0	0	0	0	0	0	0	0	0	0	0	0	0	0	0	0	0	0	0	0	0	0	0	0	0	0	0	0	0	0	0	0	0	0	0	0	0	0	0	0	0	0	0	0	0	0	0	0	0
d__Eukaryota;p__Streptophyta;c__Magnoliopsida;o__Lamiales;f__Lamiaceae;g__Salvia;s__Salvialeucantha	0	0	0	0	0	0	0	0	0	0	0	0	0	0	0	0	0	0	0	0	0	0	0	0	0	0	0	0	0	0	0	0	0	0	0	0	0	0	0	0	0	0	0	0	0	0	0	0	0
d__Eukaryota;p__Streptophyta;c__Magnoliopsida;o__Lamiales;f__Lamiaceae;g__Salvia;s__Salviapersonata	0	0	0	0	0	0	0	0	0	0	0	0	0	0	0	0	0	0	0	0	0	0	0	0	0	0	0	0	0	0	0	0	0	0	0	0	0	0	0	0	0	0	0	0	0	0	0	0	0
d__Eukaryota;p__Streptophyta;c__Magnoliopsida;o__Malvales;f__Malvaceae;g__Tilia;s__Tiliaoliveri	0	0	0	0	0	0	0	0	0	0	0	0	0	0	0	0	0	0	0	0	0	0	0	0	0	0	0	0	0	0	0	0	0	0	0	0	0	0	0	0	0	0	0	0	0	0	0	0	0
d__Eukaryota;p__Streptophyta;c__Magnoliopsida;o__Poales;f__Poaceae;g__Cenchrus;s__Cenchrusflaccidus	0	0	0	0	0	0	0	0	0	0	0	0	0	0	0	0	0	0	0	0	0	0	0	0	0	0	0	0	0	0	0	0	0	0	0	0	0	0	0	0	0	0	0	0	0	0	0	0	0
d__Eukaryota;p__Streptophyta;c__Magnoliopsida;o__Poales;f__Poaceae;g__Elymus;s__Elymustauri	0	0	0	0	0	0	0	0	0	0	0	0	0	0	0	0	0	0	0	0	0	0	0	0	0	0	0	0	0	0	5	0	0	0	0	0	0	0	0	0	0	0	0	0	0	0	0	0	0
d__Eukaryota;p__Streptophyta;c__Magnoliopsida;o__Poales;f__Poaceae;g__Festuca;s__Festucasuperba	0	0	0	0	0	0	0	0	0	0	0	0	0	0	0	0	0	0	0	0	0	0	0	0	0	0	0	0	0	0	0	0	0	0	0	0	0	0	0	0	0	0	0	0	0	0	0	0	0
d__Eukaryota;p__Streptophyta;c__Magnoliopsida;o__Ranunculales;f__Ranunculaceae;g__Clematis;s__Clematissp.DPP-2020	0	0	0	0	0	0	0	0	0	0	0	0	0	0	0	0	0	0	0	0	0	0	0	0	0	0	0	0	0	0	0	0	0	0	0	0	0	0	0	0	0	0	0	0	0	0	0	0	0
d__Eukaryota;p__Streptophyta;c__Magnoliopsida;o__Ranunculales;f__Ranunculaceae;g__Thalictrum;s__Thalictrumarkansanum	0	0	0	0	0	0	0	0	0	0	0	0	0	0	0	0	0	0	0	0	0	0	0	0	0	0	0	0	0	0	0	0	0	0	0	0	0	0	0	0	0	0	0	0	0	0	0	0	0
d__Eukaryota;p__Streptophyta;c__Magnoliopsida;o__Rosales;f__Moraceae;g__Morus;s__MorusalbaxMorusrubra	0	0	0	0	0	0	0	0	0	0	0	0	0	0	0	0	0	0	0	0	0	0	0	0	0	0	0	0	0	0	0	0	0	0	0	0	0	0	0	0	0	0	0	0	0	0	0	0	0
d__Eukaryota;p__Streptophyta;c__Magnoliopsida;o__Rosales;f__Rosaceae;g__Crataegus;s__Crataegusscabrifolia	0	0	0	0	0	0	0	0	0	0	0	0	0	0	0	0	0	0	0	0	0	0	0	0	0	0	0	0	0	0	0	0	0	0	0	0	0	0	0	0	0	0	0	0	0	0	0	0	0
d__Eukaryota;p__Streptophyta;c__Magnoliopsida;o__Rosales;f__Rosaceae;g__Dasiphora;s__Dasiphorafruticosa	0	0	0	0	0	0	0	0	0	0	0	0	0	0	0	0	0	0	0	0	0	0	0	0	0	0	0	0	0	0	0	0	0	0	0	0	0	0	0	0	0	0	0	0	0	0	0	0	0
d__Eukaryota;p__Streptophyta;c__Magnoliopsida;o__Rosales;f__Rosaceae;g__Malus;s__Malusxatrosanguinea	0	0	0	0	0	0	0	0	0	0	0	0	0	0	0	0	0	0	0	0	0	0	0	0	0	0	0	0	0	0	0	0	0	0	0	0	0	0	0	0	0	0	0	0	0	0	0	0	0
d__Eukaryota;p__Streptophyta;c__Magnoliopsida;o__Rosales;f__Rosaceae;g__Potentilla;s__Potentillaovina	0	0	0	0	0	0	0	0	0	0	0	0	0	0	0	0	0	0	0	0	0	0	0	0	0	0	0	0	0	0	0	0	0	0	0	0	0	0	0	0	0	0	0	0	0	0	0	0	0
d__Eukaryota;p__Streptophyta;c__Magnoliopsida;o__Rosales;f__Rosaceae;g__Rosa;s__Rosatomentosa	0	0	0	0	0	0	0	0	0	0	0	0	0	0	0	0	1	0	0	0	0	0	0	0	0	0	0	0	0	0	0	0	0	0	0	0	0	0	0	0	0	0	0	0	0	0	0	0	0
d__Eukaryota;p__Streptophyta;c__Magnoliopsida;o__Rosales;f__Rosaceae;g__Spiraea;s__Spiraeajaponica	0	0	0	0	0	0	0	0	0	0	0	0	0	0	0	0	0	0	0	0	0	0	0	0	0	0	0	0	0	0	0	0	0	0	0	0	0	0	0	0	0	0	0	0	0	0	0	0	0
d__Eukaryota;p__Streptophyta;c__Pinopsida;o__Pinales;f__Pinaceae;g__Pinus;s__Pinussylvestris	0	0	0	0	0	0	0	0	0	0	0	0	0	0	0	0	0	0	0	0	0	0	0	0	0	0	0	0	0	0	0	0	0	0	0	0	0	0	0	0	0	0	0	0	0	0	0	0	0
d__Eukaryota;p__Streptophyta;c__Magnoliopsida;o__Asterales;f__Asteraceae;g__Ambrosia;s__Ambrosiapsilostachya	0	0	0	0	0	0	0	0	0	0	0	0	0	0	0	0	0	0	0	0	0	0	0	0	0	0	0	0	0	0	0	0	0	0	0	0	0	0	0	0	0	0	0	0	0	0	0	0	0
d__Eukaryota;p__Streptophyta;c__Magnoliopsida;o__Asterales;f__Asteraceae;g__Artemisia;s__Artemisiasieberi	0	0	0	0	0	0	0	0	0	0	0	0	0	0	0	0	0	0	0	0	0	0	0	0	0	0	0	0	0	0	0	0	0	0	0	0	0	0	0	0	0	0	0	0	0	0	0	0	0
d__Eukaryota;p__Streptophyta;c__Magnoliopsida;o__Asterales;f__Asteraceae;g__Artemisia;s__Artemisiasieversiana	0	0	0	0	0	0	0	0	0	0	0	0	0	0	0	0	0	0	0	0	0	0	0	0	0	0	0	0	0	0	0	0	0	0	0	0	0	0	0	0	0	0	0	0	0	0	0	0	0
d__Eukaryota;p__Streptophyta;c__Magnoliopsida;o__Asterales;f__Asteraceae;g__Inula;s__Inularacemosa	0	0	0	0	0	0	0	0	0	0	0	0	0	0	0	0	0	0	0	0	0	0	0	0	0	0	0	0	0	0	0	0	0	0	0	0	0	0	0	0	0	0	0	0	0	0	0	0	0
d__Eukaryota;p__Streptophyta;c__Magnoliopsida;o__Asterales;f__Asteraceae;g__Parthenium;s__Partheniumligulatum	0	0	0	0	0	0	0	0	0	0	0	0	0	0	0	0	0	0	0	0	0	0	0	0	0	0	0	0	0	0	0	0	0	0	0	0	0	0	0	0	0	0	0	0	0	0	0	0	0
d__Eukaryota;p__Streptophyta;c__Magnoliopsida;o__Asterales;f__Asteraceae;g__Taraxacum;s__Taraxacumofficinale	0	0	0	0	0	0	0	0	0	0	0	0	0	0	0	0	0	0	0	0	0	0	0	0	0	0	0	0	0	0	0	0	0	0	0	0	0	0	0	0	0	0	0	0	0	0	0	0	0
d__Eukaryota;p__Streptophyta;c__Magnoliopsida;o__Brassicales;f__Brassicaceae;g__Spryginia;s__Spryginiagracilis	0	0	0	0	0	0	0	0	0	0	0	0	0	0	0	0	0	0	0	0	0	0	0	0	0	0	0	0	0	0	0	0	0	0	0	0	0	0	0	0	0	0	0	0	0	0	0	0	0
d__Eukaryota;p__Streptophyta;c__Magnoliopsida;o__Brassicales;f__Brassicaceae;g__Sterigmostemum;s__Sterigmostemumsulphureum	0	0	0	0	0	0	0	0	0	0	0	0	0	0	0	0	0	0	0	0	0	0	0	0	0	0	0	0	0	0	0	0	0	0	0	0	2	0	0	0	0	0	0	0	0	0	0	0	0
d__Eukaryota;p__Streptophyta;c__Magnoliopsida;o__Caryophyllales;f__Caryophyllaceae;g__Silene;s__Silenemacrostyla	0	0	0	0	0	0	0	0	0	0	0	0	0	0	0	0	0	0	0	0	0	0	0	0	0	0	0	0	0	0	0	0	0	0	0	0	0	0	0	0	0	0	0	0	0	0	0	0	0
d__Eukaryota;p__Streptophyta;c__Magnoliopsida;o__Caryophyllales;f__Chenopodiaceae;g__Kalidium;s__Kalidiumfoliatum	0	0	0	0	0	0	0	0	0	0	0	0	0	0	0	0	0	0	0	0	0	0	0	0	0	0	0	0	0	0	0	0	0	0	0	0	0	0	0	0	0	0	0	0	0	0	0	0	0
d__Eukaryota;p__Streptophyta;c__Magnoliopsida;o__Caryophyllales;f__Chenopodiaceae;g__Suaeda;s__Suaedasibirica	0	0	0	0	0	0	0	0	0	0	0	0	0	0	0	0	0	0	0	0	0	0	0	0	0	0	0	0	0	0	0	0	0	0	0	0	0	0	0	0	0	0	0	0	0	0	0	0	0
d__Eukaryota;p__Streptophyta;c__Magnoliopsida;o__Caryophyllales;f__Polygonaceae;g__Rumex;s__Rumexnepalensis	0	0	0	0	0	0	0	0	0	0	0	0	0	0	0	0	0	0	0	0	0	0	0	0	0	0	0	0	0	0	0	0	0	0	0	0	0	0	0	0	0	0	0	0	0	0	0	0	0
d__Eukaryota;p__Streptophyta;c__Magnoliopsida;o__Cucurbitales;f__Cucurbitaceae;g__Citrullus;s__Citrullusamarus	0	0	0	0	0	0	0	0	0	0	0	0	0	0	0	0	0	0	0	0	0	0	0	0	0	0	0	0	0	0	0	0	0	0	0	0	0	0	0	0	0	0	0	0	0	0	0	0	0
d__Eukaryota;p__Streptophyta;c__Magnoliopsida;o__Fabales;f__Fabaceae;g__Loesenera;s__Loeseneragabonensis	0	0	0	0	0	0	0	0	0	0	0	0	0	0	0	0	0	0	0	0	0	0	0	0	0	0	0	0	0	0	0	0	0	0	0	0	0	0	0	0	0	0	0	0	0	0	0	0	0
d__Eukaryota;p__Streptophyta;c__Magnoliopsida;o__Fagales;f__Fagaceae;g__Quercus;s__Quercuspetraea	0	0	0	0	0	0	0	0	0	0	0	0	0	0	0	0	0	0	0	0	0	0	0	0	0	0	0	0	0	0	0	0	0	0	0	0	0	0	0	0	0	0	0	0	0	0	0	0	0
d__Eukaryota;p__Streptophyta;c__Magnoliopsida;o__Lamiales;f__Lamiaceae;g__Thymus;s__Thymusmongolicus	0	0	0	0	0	0	0	0	0	0	0	0	0	0	0	0	0	0	0	0	0	0	0	0	0	0	0	0	0	0	0	0	0	0	0	0	0	0	0	0	0	0	0	0	0	0	0	0	0
d__Eukaryota;p__Streptophyta;c__Magnoliopsida;o__Malvales;f__Malvaceae;g__Lebronnecia;s__Lebronneciakokioides	0	0	0	0	0	0	0	0	0	0	0	0	0	0	0	0	0	0	0	0	0	0	0	0	0	0	0	0	0	0	0	0	0	0	0	0	0	0	0	0	0	0	0	0	0	0	0	0	0
d__Eukaryota;p__Streptophyta;c__Magnoliopsida;o__Myrtales;f__Lythraceae;g__Lagerstroemia;s__Lagerstroemiaexcelsa	0	0	0	0	0	0	0	0	0	0	0	0	0	0	0	0	0	0	0	0	0	0	0	0	0	0	0	0	0	0	0	0	0	0	0	0	0	0	0	0	0	0	0	0	0	0	0	0	0
d__Eukaryota;p__Streptophyta;c__Magnoliopsida;o__Myrtales;f__Lythraceae;g__Rotala;s__Rotalamacrandra	0	0	0	0	0	0	0	0	0	0	0	0	0	0	0	0	0	0	0	0	0	0	0	0	0	0	0	0	0	0	0	0	0	0	0	0	0	0	0	0	0	0	0	0	0	0	0	0	0
d__Eukaryota;p__Streptophyta;c__Magnoliopsida;o__Ranunculales;f__Ranunculaceae;g__Thalictrum;s__Thalictrumpunctatum	0	0	0	0	0	0	0	0	0	0	0	0	0	0	0	0	0	0	0	0	0	0	0	0	0	0	0	0	0	0	0	0	0	0	0	0	0	0	0	0	0	0	0	0	0	0	0	0	0
d__Eukaryota;p__Streptophyta;c__Magnoliopsida;o__Rosales;f__Rhamnaceae;g__Rhamnus;s__Rhamnuscathartica	0	0	0	0	0	0	0	0	0	0	0	0	0	0	0	0	0	0	0	0	0	0	0	0	0	0	0	0	0	0	0	0	0	0	0	0	0	0	0	0	0	0	0	0	0	0	0	0	0
d__Eukaryota;p__Streptophyta;c__Magnoliopsida;o__Rosales;f__Rosaceae;g__Prunus;s__Prunuspseudocerasus	0	0	0	0	0	0	0	0	0	0	0	0	0	0	0	0	0	0	0	0	0	0	0	0	0	0	0	0	0	0	0	0	0	0	0	0	0	0	0	0	0	0	0	0	0	0	0	0	0
d__Eukaryota;p__Streptophyta;c__Magnoliopsida;o__Sapindales;f__Anacardiaceae;g__Mangifera;s__Mangiferaindica	0	0	0	0	0	0	0	0	0	0	0	0	0	0	0	0	0	0	0	0	0	0	0	0	0	0	0	0	0	0	0	0	0	0	0	0	0	0	0	0	0	0	0	0	0	0	0	0	0
d__Eukaryota;p__Streptophyta;c__Magnoliopsida;o__Sapindales;f__Nitrariaceae;g__Nitraria;s__Nitrariatangutorum	0	0	0	0	0	0	0	0	0	0	0	0	0	0	0	0	0	0	0	0	0	0	0	0	0	0	0	0	0	0	0	0	0	0	0	0	0	0	0	0	0	0	0	0	0	0	0	0	0
d__Eukaryota;p__Streptophyta;c__Magnoliopsida;o__Saxifragales;f__Crassulaceae;g__Orostachys;s__Orostachysjaponica	0	0	0	0	0	0	0	0	0	0	0	0	0	0	0	0	0	0	0	0	0	0	0	0	0	0	0	0	0	0	0	0	0	0	0	0	0	0	0	0	0	0	0	0	0	0	0	0	0
d__Eukaryota;p__Streptophyta;c__Magnoliopsida;o__Solanales;f__Convolvulaceae;g__Calystegia;s__Calystegiasilvatica	0	0	0	0	0	0	0	0	0	0	0	0	0	0	0	0	0	0	0	0	0	0	0	0	0	0	0	0	0	0	0	0	0	0	0	0	0	0	0	0	0	0	0	0	0	0	0	0	0
d__Eukaryota;p__Streptophyta;c__Magnoliopsida;o__Asterales;f__Asteraceae;g__Acmella;s__Acmellabrachyglossa	0	0	0	0	0	0	0	0	0	0	0	0	0	0	0	0	0	0	0	0	0	0	0	0	0	0	0	0	0	0	0	0	0	0	0	0	0	0	0	0	0	0	0	0	0	0	0	0	0
d__Eukaryota;p__Streptophyta;c__Magnoliopsida;o__Asterales;f__Asteraceae;g__Andryala;s__Andryalapinnatifida	0	0	0	0	0	0	0	0	0	0	0	0	0	0	0	0	0	0	0	0	0	0	0	0	0	0	0	0	0	0	0	0	0	0	0	0	0	0	0	0	0	0	0	0	0	0	0	0	0
d__Eukaryota;p__Streptophyta;c__Magnoliopsida;o__Asterales;f__Asteraceae;g__Carduus;s__Carduusacanthoides	0	0	0	0	0	0	0	0	0	0	0	0	0	0	0	0	0	0	0	0	0	0	0	0	0	0	0	0	0	0	0	0	0	0	0	0	0	0	0	0	0	0	0	0	0	0	0	0	1
d__Eukaryota;p__Streptophyta;c__Magnoliopsida;o__Asterales;f__Asteraceae;g__Eclipta;s__Ecliptaprostrata	0	0	0	0	0	0	0	0	0	0	0	0	0	0	0	0	0	0	0	0	0	0	0	0	0	0	0	0	0	0	0	0	0	0	0	0	0	0	0	0	0	0	0	0	0	0	0	0	0
d__Eukaryota;p__Streptophyta;c__Magnoliopsida;o__Asterales;f__Asteraceae;g__Pentzia;s__Pentzialimnophila	0	0	0	0	0	0	0	0	0	0	0	0	0	0	0	0	0	0	0	0	0	0	0	0	0	0	0	0	0	0	0	0	0	0	0	0	0	0	0	0	0	0	0	0	0	0	0	0	0
d__Eukaryota;p__Streptophyta;c__Magnoliopsida;o__Asterales;f__Asteraceae;g__Picris;s__Picrisburbidgeae	0	0	0	0	0	0	0	0	0	0	0	0	0	0	0	0	0	0	0	0	0	0	0	0	0	0	0	0	0	0	0	0	0	0	0	0	0	0	0	0	0	0	0	0	0	0	0	0	0
d__Eukaryota;p__Streptophyta;c__Magnoliopsida;o__Asterales;f__Asteraceae;g__Rhodanthemum;s__Rhodanthemumquezelii	0	0	0	0	0	0	0	0	0	0	0	0	0	0	0	0	0	0	0	0	0	0	0	0	0	0	0	0	0	0	0	0	0	0	0	0	0	0	0	0	0	0	0	0	0	0	0	0	0
d__Eukaryota;p__Streptophyta;c__Magnoliopsida;o__Boraginales;f__Boraginaceae;g__Eritrichium;s__Eritrichiumrupestre	0	0	0	0	0	0	0	0	0	0	0	0	0	0	0	0	0	0	0	0	0	0	0	0	0	0	0	0	0	0	0	0	0	0	0	0	0	0	0	0	0	0	0	0	0	0	0	0	0
d__Eukaryota;p__Streptophyta;c__Magnoliopsida;o__Boraginales;f__Boraginaceae;g__Trigonotis;s__Trigonotispeduncularis	0	0	0	0	0	0	0	0	0	0	0	0	0	0	0	0	0	0	0	0	0	0	0	0	0	0	0	0	0	0	0	0	0	0	0	0	0	0	0	0	0	0	0	0	0	0	0	0	0
d__Eukaryota;p__Streptophyta;c__Magnoliopsida;o__Brassicales;f__Brassicaceae;g__Sisymbrium;s__Sisymbriumofficinale	0	0	0	0	0	0	0	0	0	0	0	0	0	0	0	0	0	0	0	0	0	0	0	0	0	0	0	0	0	0	0	1	0	0	0	0	0	0	0	0	0	0	0	0	0	0	0	0	0
d__Eukaryota;p__Streptophyta;c__Magnoliopsida;o__Brassicales;f__Brassicaceae;g__Streptanthus;s__Streptanthustortuosus	0	0	0	0	0	0	0	0	0	0	0	0	0	0	0	0	0	0	0	0	0	0	0	0	0	0	0	0	0	0	0	0	0	0	0	0	0	0	0	0	0	0	0	0	0	0	0	0	0
d__Eukaryota;p__Streptophyta;c__Magnoliopsida;o__Caryophyllales;f__Chenopodiaceae;g__Atriplex;s__Atriplexsp.YeelirrieStation	0	0	0	0	0	0	0	0	0	0	0	0	0	0	0	0	0	0	0	0	0	0	0	0	0	0	0	0	0	0	0	0	0	0	0	0	0	0	0	0	0	0	0	0	0	0	0	0	0
d__Eukaryota;p__Streptophyta;c__Magnoliopsida;o__Caryophyllales;f__Chenopodiaceae;g__Suaeda;s__Suaedaheteroptera	0	0	0	0	0	0	0	0	0	0	0	0	0	0	0	0	0	0	0	0	0	0	0	0	0	0	0	0	0	0	0	0	0	0	0	0	0	0	0	0	0	0	0	0	0	0	0	0	0
d__Eukaryota;p__Streptophyta;c__Magnoliopsida;o__Cornales;f__Hydrangeaceae;g__Philadelphus;s__Philadelphusincanus	0	0	0	0	0	0	0	0	0	0	0	0	0	0	0	0	0	0	0	0	0	0	0	0	0	0	0	0	0	0	0	0	0	0	0	0	0	0	0	0	0	0	0	0	0	0	0	0	0
d__Eukaryota;p__Streptophyta;c__Magnoliopsida;o__Fagales;f__Betulaceae;g__Carpinus;s__Carpinusturczaninowii	0	0	0	0	0	0	0	0	0	0	0	0	0	0	0	0	0	0	0	0	0	0	0	0	0	0	0	0	0	0	0	0	0	0	0	0	0	0	0	0	0	0	0	0	0	0	0	0	0
d__Eukaryota;p__Streptophyta;c__Magnoliopsida;o__Gentianales;f__Rubiaceae;g__Rubia;s__Rubiahorrida	0	0	0	0	0	0	0	0	0	0	0	0	0	0	0	0	0	0	0	0	0	0	0	0	0	0	0	0	0	0	0	0	0	0	0	0	0	0	0	0	0	0	0	0	0	0	0	0	0
d__Eukaryota;p__Streptophyta;c__Magnoliopsida;o__Lamiales;f__Lamiaceae;g__Salvia;s__Salviamiltiorrhiza	0	0	0	0	0	0	0	0	0	0	0	0	0	0	0	0	0	0	0	0	0	0	0	0	0	0	0	0	0	0	0	0	0	0	0	0	0	0	0	0	0	0	0	0	0	0	0	0	0
d__Eukaryota;p__Streptophyta;c__Magnoliopsida;o__Lamiales;f__Lamiaceae;g__Volkameria;s__Volkameriainermis	0	0	0	0	0	0	0	0	0	0	0	0	0	0	0	0	0	0	0	0	0	0	0	0	0	0	0	0	0	0	0	0	0	0	0	0	0	0	0	0	0	0	0	0	0	0	0	0	0
d__Eukaryota;p__Streptophyta;c__Magnoliopsida;o__Malvales;f__Malvaceae;g__Gossypium;s__Gossypiumharknessii	0	0	0	0	0	0	0	0	0	0	0	0	0	0	0	0	0	0	0	0	0	0	0	0	0	0	0	0	0	0	0	0	0	0	0	0	0	0	0	0	0	0	0	0	0	0	0	0	0
d__Eukaryota;p__Streptophyta;c__Magnoliopsida;o__Malvales;f__Malvaceae;g__Kydia;s__Kydiasp.BB1090	0	0	0	0	0	0	0	0	0	0	0	0	0	0	0	0	0	0	0	0	0	0	0	0	0	0	0	0	0	0	0	0	0	0	0	0	0	0	0	0	0	0	0	0	0	0	0	0	0
d__Eukaryota;p__Streptophyta;c__Magnoliopsida;o__Malvales;f__Malvaceae;g__Peltaea;s__Peltaeariedelii	0	0	0	0	0	0	0	0	0	0	0	0	0	0	0	0	0	0	0	0	0	0	0	0	0	0	0	0	0	0	0	0	0	0	0	0	0	0	0	0	0	0	0	0	0	0	0	0	0
d__Eukaryota;p__Streptophyta;c__Magnoliopsida;o__Poales;f__Poaceae;g__Dupontia;s__Dupontiafisheri	0	0	0	0	0	0	0	0	0	0	0	0	0	0	0	0	0	0	0	0	0	0	0	0	0	0	0	0	0	0	0	0	0	0	0	0	0	0	0	0	0	0	0	0	0	0	0	0	0
d__Eukaryota;p__Streptophyta;c__Magnoliopsida;o__Poales;f__Poaceae;g__Lolium;s__Loliumpersicum	0	0	0	0	0	0	0	0	0	0	0	0	0	0	0	0	0	0	0	0	0	0	0	0	0	0	0	0	0	0	0	0	0	0	0	0	0	0	0	0	0	0	0	0	0	0	0	0	0
d__Eukaryota;p__Streptophyta;c__Magnoliopsida;o__Poales;f__Poaceae;g__Tripidium;s__Tripidiumarundinaceum	0	0	0	0	0	0	0	0	0	0	0	0	0	0	0	0	0	0	0	0	0	0	0	0	0	0	0	0	0	0	0	0	0	0	0	0	0	0	0	0	0	0	0	0	0	0	0	0	0
d__Eukaryota;p__Streptophyta;c__Magnoliopsida;o__Poales;f__Poaceae;g__Triticum;s__Triticumtimopheevii	0	0	0	0	0	0	0	0	0	0	0	0	0	0	0	0	0	0	0	0	0	0	0	0	0	0	0	0	0	0	3	0	0	2	0	0	0	0	0	0	0	0	0	0	0	0	0	0	0
d__Eukaryota;p__Streptophyta;c__Magnoliopsida;o__Rosales;f__Moraceae;g__Broussonetia;s__Broussonetiagreveana	0	0	0	0	0	0	0	0	0	0	0	0	0	0	0	0	0	0	0	0	0	0	0	0	0	0	0	0	0	0	0	0	0	0	0	0	0	0	0	0	0	0	0	0	0	0	0	0	0
d__Eukaryota;p__Streptophyta;c__Magnoliopsida;o__Rosales;f__Rosaceae;g__Cliffortia;s__Cliffortiasetifolia	0	0	0	0	0	0	0	0	0	0	0	0	0	0	0	0	0	0	0	0	0	0	0	0	0	0	0	0	0	0	0	0	0	0	0	0	0	0	0	0	0	0	0	0	0	0	0	0	0
d__Eukaryota;p__Streptophyta;c__Magnoliopsida;o__Sapindales;f__Anacardiaceae;g__Cotinus;s__Cotinuscoggygria	0	0	0	0	0	0	0	0	0	0	0	0	0	0	0	0	0	0	0	0	0	0	0	0	0	0	0	0	0	0	0	0	0	0	0	0	0	0	0	0	0	0	0	0	0	0	0	0	0
d__Eukaryota;p__Streptophyta;c__Pinopsida;o__Pinales;f__Pinaceae;g__Pinus;s__Pinusheldreichii	0	0	0	0	0	0	0	0	0	0	0	0	0	0	0	0	0	0	0	0	0	0	0	0	0	0	0	0	0	0	0	0	0	0	0	0	0	0	0	0	0	0	0	0	0	0	0	0	0
d__Eukaryota;p__Streptophyta;c__Magnoliopsida;o__Apiales;f__Apiaceae;g__Ferula;s__Ferularutbaensis	0	0	0	0	0	0	0	0	0	0	0	0	0	0	0	0	0	0	0	0	0	0	0	0	0	0	0	0	0	0	0	0	0	0	0	0	0	0	0	0	0	0	0	0	0	0	0	0	0
d__Eukaryota;p__Streptophyta;c__Magnoliopsida;o__Asterales;f__Asteraceae;g__Ajania;s__Ajaniakhartensis	0	0	0	0	0	0	0	0	0	0	0	0	0	0	0	0	0	0	0	0	0	0	0	0	0	0	0	0	0	0	0	0	0	0	0	0	0	0	0	0	0	0	0	0	0	0	0	0	0
d__Eukaryota;p__Streptophyta;c__Magnoliopsida;o__Asterales;f__Asteraceae;g__Ambrosia;s__Ambrosiaconfertiflora	0	0	0	0	0	0	0	0	0	0	0	0	0	0	0	0	0	0	0	0	0	0	0	0	0	0	0	0	0	0	0	0	0	0	0	0	0	0	0	0	0	0	0	0	0	0	0	0	0
d__Eukaryota;p__Streptophyta;c__Magnoliopsida;o__Asterales;f__Asteraceae;g__Cirsium;s__Cirsiumsp.SN1	0	0	0	0	0	0	0	0	0	0	0	0	0	0	0	0	0	0	0	0	0	0	0	0	0	0	0	0	0	0	0	0	0	0	0	0	0	0	0	0	0	0	0	0	0	0	0	0	0
d__Eukaryota;p__Streptophyta;c__Magnoliopsida;o__Asterales;f__Asteraceae;g__Crepis;s__Crepiserythia	0	0	0	0	0	0	0	0	0	0	0	0	0	0	0	0	0	0	0	0	0	0	0	0	0	0	0	0	0	0	0	0	0	0	0	0	0	0	0	0	0	0	0	0	0	0	0	0	0
d__Eukaryota;p__Streptophyta;c__Magnoliopsida;o__Asterales;f__Asteraceae;g__Hieracium;s__Hieraciumrubrum	0	0	0	0	0	0	0	0	0	0	0	0	0	0	0	0	0	0	0	0	0	0	0	0	0	0	0	0	0	0	0	0	0	0	0	0	0	0	0	0	0	0	0	0	0	0	0	0	0
d__Eukaryota;p__Streptophyta;c__Magnoliopsida;o__Asterales;f__Asteraceae;g__Hieracium;s__Hieraciumsphaerocephalum	0	0	0	0	0	0	0	0	0	0	0	0	0	0	0	0	0	0	0	0	0	0	0	0	0	0	0	0	0	0	0	0	0	0	0	0	0	0	0	0	0	0	0	0	0	0	0	0	0
d__Eukaryota;p__Streptophyta;c__Magnoliopsida;o__Asterales;f__Asteraceae;g__Mauranthemum;s__Mauranthemumpaludosum	0	0	0	0	0	0	0	0	0	0	0	0	0	0	0	0	0	0	0	0	0	0	0	0	0	0	0	0	0	0	0	0	0	0	0	0	0	0	0	0	0	0	0	0	0	0	0	0	0
d__Eukaryota;p__Streptophyta;c__Magnoliopsida;o__Asterales;f__Asteraceae;g__Rhaponticum;s__Rhaponticumcarthamoides	0	0	0	0	0	0	0	0	0	0	0	0	0	0	0	0	0	0	0	0	0	0	0	0	0	0	0	0	0	0	0	0	0	0	0	0	0	0	0	0	0	0	0	0	0	0	0	0	0
d__Eukaryota;p__Streptophyta;c__Magnoliopsida;o__Brassicales;f__Brassicaceae;g__Brassica;s__Brassicanigra	0	0	0	0	0	0	0	0	0	0	0	0	0	0	0	0	0	0	0	0	0	0	0	0	0	0	0	0	0	0	0	0	0	0	0	0	0	0	0	0	0	0	0	0	0	0	0	0	0
d__Eukaryota;p__Streptophyta;c__Magnoliopsida;o__Brassicales;f__Brassicaceae;g__Lepidium;s__Lepidiummeyenii	0	0	0	0	0	0	0	0	0	0	0	0	0	0	0	0	0	0	0	0	0	0	0	0	0	0	0	0	0	0	0	0	0	0	0	0	0	0	0	0	0	0	0	0	0	0	0	0	0
d__Eukaryota;p__Streptophyta;c__Magnoliopsida;o__Celastrales;f__Celastraceae;g__Celastrus;s__Celastruspaniculatus	0	0	0	0	0	0	0	0	0	0	0	0	0	0	0	0	0	0	0	0	0	0	0	0	0	0	0	0	0	0	0	0	0	0	0	0	0	0	0	0	0	0	0	0	0	0	0	0	0
d__Eukaryota;p__Streptophyta;c__Magnoliopsida;o__Celastrales;f__Celastraceae;g__Euonymus;s__Euonymusschensianus	0	0	0	0	0	0	0	0	0	0	0	0	0	0	0	0	0	0	0	0	0	0	0	0	0	0	0	0	0	0	0	0	0	0	0	0	0	0	0	0	0	0	0	0	0	0	0	0	0
d__Eukaryota;p__Streptophyta;c__Magnoliopsida;o__Cucurbitales;f__Begoniaceae;g__Begonia;s__Begoniaravenii	0	0	0	0	0	0	0	0	0	0	0	0	0	0	0	0	0	0	0	0	0	0	0	0	0	0	0	0	0	0	0	0	0	0	0	0	0	0	0	0	0	0	0	0	0	0	0	0	0
d__Eukaryota;p__Streptophyta;c__Magnoliopsida;o__Fabales;f__Fabaceae;g__Parryella;s__Parryellafilifolia	0	0	0	0	0	0	0	0	0	0	0	0	0	0	0	0	0	0	0	0	0	0	0	0	0	0	0	0	0	0	0	0	0	0	0	0	0	0	0	0	0	0	0	0	0	0	0	0	0
d__Eukaryota;p__Streptophyta;c__Magnoliopsida;o__Geraniales;f__Geraniaceae;g__Geranium;s__Geraniumaff.retrorsumAK285250	0	0	0	0	0	0	0	0	0	0	0	0	0	0	3	0	0	0	0	0	0	0	0	0	0	0	0	0	0	0	0	0	0	1	0	0	0	0	0	0	0	0	0	0	0	0	0	0	0
d__Eukaryota;p__Streptophyta;c__Magnoliopsida;o__Lamiales;f__Lamiaceae;g__Amethystea;s__Amethysteacaerulea	0	0	0	0	0	0	0	0	0	0	0	0	0	0	0	0	0	0	0	0	0	0	0	0	0	0	0	0	0	0	0	0	0	0	0	0	0	0	0	0	0	0	0	0	0	0	0	0	0
d__Eukaryota;p__Streptophyta;c__Magnoliopsida;o__Malpighiales;f__Phyllanthaceae;g__Flueggea;s__Flueggealeucopyrus	0	0	0	0	0	0	0	0	0	0	0	0	0	0	0	0	0	0	0	0	0	0	0	0	0	0	0	0	0	0	0	0	0	0	0	0	0	0	0	0	0	0	0	0	0	0	0	0	0
d__Eukaryota;p__Streptophyta;c__Magnoliopsida;o__Malpighiales;f__Phyllanthaceae;g__Heterosavia;s__Heterosaviabahamensis	0	0	0	0	0	0	0	0	0	0	0	0	0	0	0	0	0	0	0	0	0	0	0	0	0	0	0	0	0	0	0	0	0	0	0	0	0	0	0	0	0	0	0	0	0	0	0	0	0
d__Eukaryota;p__Streptophyta;c__Magnoliopsida;o__Malvales;f__Malvaceae;g__Gossypium;s__Gossypiumanomalum	0	0	0	0	0	0	0	0	0	0	0	0	0	0	0	0	0	0	0	0	0	0	0	0	0	0	0	0	0	0	0	0	0	0	0	0	0	0	0	0	0	0	0	0	0	0	0	0	0
d__Eukaryota;p__Streptophyta;c__Magnoliopsida;o__Myrtales;f__Onagraceae;g__Ludwigia;s__Ludwigiaprostrata	0	0	0	0	0	0	0	0	0	0	0	0	0	0	0	0	0	0	0	0	0	0	0	0	0	0	0	0	0	0	0	0	0	0	0	0	0	0	0	0	0	0	0	0	0	0	0	0	0
d__Eukaryota;p__Streptophyta;c__Magnoliopsida;o__Poales;f__Poaceae;g__Lasiorhachis;s__Lasiorhachishildebrandtii	0	0	0	0	0	0	0	0	0	0	0	0	0	0	0	0	0	0	0	0	0	0	0	0	0	0	0	0	0	0	0	0	0	0	0	0	0	0	0	0	0	0	0	0	0	0	0	0	0
d__Eukaryota;p__Streptophyta;c__Magnoliopsida;o__Rosales;f__Moraceae;g__Maclura;s__Maclurafruticosa	0	0	0	0	0	0	0	0	0	0	0	0	0	0	0	0	0	0	0	0	0	0	0	0	0	0	0	0	0	0	0	0	0	0	0	0	0	0	0	0	0	0	0	0	0	0	0	0	0
d__Eukaryota;p__Streptophyta;c__Magnoliopsida;o__Rosales;f__Rosaceae;g__Cliffortia;s__Cliffortiaintegerrima	0	0	0	0	0	0	0	0	0	0	0	0	0	0	0	0	0	0	0	0	0	0	0	0	0	0	0	0	0	0	0	0	0	0	0	0	0	0	0	0	0	0	0	0	0	0	0	0	0
d__Eukaryota;p__Streptophyta;c__Magnoliopsida;o__Rosales;f__Rosaceae;g__Crataegus;s__Crataegussongarica	0	0	0	0	0	0	0	0	0	0	0	0	0	0	0	0	0	0	0	0	0	0	0	0	0	0	0	0	0	0	0	0	0	0	0	0	0	0	0	0	0	0	0	0	0	0	0	0	0
d__Eukaryota;p__Streptophyta;c__Magnoliopsida;o__Sapindales;f__Rutaceae;g__Citrus;s__Citrussunki	0	0	0	0	0	0	0	0	0	0	0	0	0	0	0	0	0	0	0	0	0	0	0	0	0	0	0	0	0	0	0	0	0	0	0	0	0	0	0	0	0	0	0	0	0	0	0	0	0
d__Eukaryota;p__Streptophyta;c__Magnoliopsida;o__Sapindales;f__Rutaceae;g__Zanthoxylum;s__Zanthoxylumplanispinum	0	0	0	0	0	0	0	0	0	0	0	0	0	0	0	0	0	0	0	0	0	0	0	0	0	0	0	0	0	0	0	0	0	0	0	0	0	0	0	0	0	0	0	0	0	0	0	0	0
d__Eukaryota;p__Streptophyta;c__Magnoliopsida;o__Sapindales;f__Sapindaceae;g__Mischocarpus;s__Mischocarpussundaicus	0	0	0	0	0	0	0	0	0	0	0	0	0	0	0	0	0	0	0	0	0	0	0	0	0	0	0	0	0	0	0	0	0	0	0	0	0	0	0	0	0	0	0	0	0	0	0	0	0
d__Eukaryota;p__Streptophyta;c__Magnoliopsida;o__Solanales;f__Solanaceae;g__Anthotroche;s__Anthotrochepannosa	0	0	0	0	0	0	0	0	0	0	0	0	0	0	0	0	0	0	0	0	0	0	0	0	0	0	0	0	0	0	0	0	0	0	0	0	0	0	0	0	0	0	0	0	0	0	0	0	0
d__Eukaryota;p__Streptophyta;c__Magnoliopsida;o__Solanales;f__Solanaceae;g__Nicotiana;s__Nicotianaotophora	0	0	0	0	0	0	0	0	0	0	0	0	0	0	0	0	0	0	0	0	0	0	0	0	0	0	0	0	0	0	0	0	0	0	0	0	0	0	0	0	0	0	0	0	0	0	0	0	0
d__Eukaryota;p__Streptophyta;c__Pinopsida;o__Pinales;f__Pinaceae;g__Larix;s__Larixdecidua	0	0	0	0	0	0	0	0	0	0	0	0	0	0	0	0	0	0	0	0	0	0	0	0	0	0	0	0	0	0	0	0	0	0	0	0	0	0	0	0	0	0	0	0	0	0	0	0	0
d__Eukaryota;p__Streptophyta;c__Magnoliopsida;o__Apiales;f__Apiaceae;g__Angelica;s__Angelicaanomala	0	0	0	0	0	0	0	0	0	0	0	0	0	0	0	2	0	0	0	0	0	0	0	0	0	0	0	0	0	0	0	0	0	0	0	0	0	0	0	0	0	0	0	0	0	0	0	0	0
d__Eukaryota;p__Streptophyta;c__Magnoliopsida;o__Apiales;f__Apiaceae;g__Cuminum;s__Cuminumcyminum	0	0	0	0	0	0	0	0	0	0	0	0	0	0	0	0	0	0	0	0	0	0	0	0	0	0	0	0	0	0	0	0	0	0	0	0	0	0	0	0	0	0	0	0	0	0	0	0	3
d__Eukaryota;p__Streptophyta;c__Magnoliopsida;o__Apiales;f__Apiaceae;g__Hymenidium;s__Hymenidiumhookeri	0	0	0	0	0	0	0	0	0	0	0	0	0	0	0	0	0	0	0	0	0	0	0	0	0	0	0	0	0	0	0	0	0	0	0	0	0	0	0	0	0	0	0	0	0	0	0	0	0
d__Eukaryota;p__Streptophyta;c__Magnoliopsida;o__Apiales;f__Apiaceae;g__Lomatium;s__Lomatiumcanbyi	0	0	0	0	0	0	0	0	0	0	0	0	0	0	0	0	0	0	0	0	0	0	0	0	0	0	0	0	0	0	0	0	0	0	0	0	0	0	0	0	0	0	0	0	0	0	0	0	0
d__Eukaryota;p__Streptophyta;c__Magnoliopsida;o__Apiales;f__Apiaceae;g__Zizia;s__Ziziaaptera	0	0	0	0	0	0	0	0	0	0	0	0	0	0	0	0	1	0	0	0	0	0	0	0	0	0	0	0	0	0	0	0	0	0	0	0	0	0	0	0	0	0	0	0	0	0	0	0	0
d__Eukaryota;p__Streptophyta;c__Magnoliopsida;o__Apiales;f__Pittosporaceae;g__Pittosporum;s__Pittosporumralphii	0	0	0	0	0	0	0	0	0	0	0	0	0	0	0	0	0	0	0	0	0	0	0	0	0	0	0	0	0	0	0	0	0	0	0	0	0	0	0	0	0	0	0	0	0	0	0	0	0
d__Eukaryota;p__Streptophyta;c__Magnoliopsida;o__Asterales;f__Asteraceae;g__Ambrosia;s__Ambrosiadumosa	0	0	0	0	0	0	0	0	0	0	0	0	0	0	0	0	0	0	0	0	0	0	0	0	0	0	0	0	0	0	0	0	0	0	0	0	0	0	0	0	0	0	0	0	0	0	0	0	0
d__Eukaryota;p__Streptophyta;c__Magnoliopsida;o__Asterales;f__Asteraceae;g__Anisochaeta;s__Anisochaetamikanioides	0	0	0	0	0	0	0	0	0	0	0	0	0	0	0	0	0	0	0	0	0	0	0	0	0	0	0	0	0	0	0	0	0	0	0	0	0	0	0	0	0	0	0	0	0	0	0	0	0
d__Eukaryota;p__Streptophyta;c__Magnoliopsida;o__Asterales;f__Asteraceae;g__Cirsium;s__Cirsiumpalustre	0	0	0	0	0	0	0	0	0	0	0	0	0	0	0	0	0	0	0	0	0	0	0	0	0	0	0	0	0	0	0	0	0	0	0	0	0	0	0	0	0	0	0	0	0	0	0	0	0
d__Eukaryota;p__Streptophyta;c__Magnoliopsida;o__Asterales;f__Asteraceae;g__Crossostephium;s__Crossostephiumchinense	0	0	0	0	0	0	0	0	0	0	0	0	0	0	0	0	0	0	0	0	0	0	0	0	0	0	0	0	0	0	0	0	0	0	0	0	0	0	0	0	0	0	0	0	0	0	0	0	0
d__Eukaryota;p__Streptophyta;c__Magnoliopsida;o__Asterales;f__Asteraceae;g__Echinops;s__Echinopsspinosissimus	0	0	0	0	0	0	0	0	0	0	0	0	0	0	0	0	0	0	0	0	0	0	0	0	0	0	0	0	0	0	0	0	0	0	0	0	0	0	0	0	0	0	0	0	0	0	0	0	0
d__Eukaryota;p__Streptophyta;c__Magnoliopsida;o__Asterales;f__Asteraceae;g__Inula;s__Inulagermanica	0	0	0	0	0	0	0	0	0	0	0	0	0	0	0	0	0	0	0	0	0	0	0	0	0	0	0	0	0	0	0	0	0	0	0	0	0	0	0	0	0	0	0	0	0	0	0	0	0
d__Eukaryota;p__Streptophyta;c__Magnoliopsida;o__Asterales;f__Asteraceae;g__Taraxacum;s__Taraxacumcoreanum	0	0	0	0	0	0	0	0	0	0	0	0	0	0	0	0	0	0	0	0	0	0	0	0	0	0	0	0	0	0	0	0	0	0	0	0	0	0	0	0	0	0	0	0	0	0	0	0	0
d__Eukaryota;p__Streptophyta;c__Magnoliopsida;o__Asterales;f__Asteraceae;g__Taraxacum;s__Taraxacumohwianum	0	0	0	0	0	0	0	0	0	0	0	0	0	0	0	0	0	0	0	0	0	0	0	0	0	0	0	0	0	0	0	0	0	0	0	0	0	0	0	0	0	0	0	0	0	0	0	0	0
d__Eukaryota;p__Streptophyta;c__Magnoliopsida;o__Asterales;f__Asteraceae;g__Xanthium;s__Xanthiumalbinum	0	0	0	0	0	0	0	0	0	0	0	0	0	0	0	0	0	0	0	0	0	0	0	0	0	0	0	0	0	0	0	0	0	0	0	0	0	0	0	0	0	0	0	0	0	0	0	0	0
d__Eukaryota;p__Streptophyta;c__Magnoliopsida;o__Asterales;f__Goodeniaceae;g__Scaevola;s__Scaevolataccada	0	0	0	0	0	0	0	0	0	0	0	0	0	0	0	0	0	0	0	0	0	0	0	0	0	0	0	0	0	0	0	0	0	0	0	0	0	0	0	0	0	0	0	0	0	0	0	0	0
d__Eukaryota;p__Streptophyta;c__Magnoliopsida;o__Brassicales;f__Brassicaceae;g__Atelanthera;s__Atelantheraperpusilla	0	0	0	0	0	0	0	0	0	0	0	0	0	0	0	0	0	0	0	0	0	0	0	0	0	0	0	0	0	0	0	0	0	0	0	0	0	0	0	0	0	0	0	0	0	0	0	0	0
d__Eukaryota;p__Streptophyta;c__Magnoliopsida;o__Brassicales;f__Brassicaceae;g__Odontarrhena;s__Odontarrhenamasmenaea	0	0	0	0	0	0	0	0	0	0	0	0	0	0	0	0	0	0	0	0	0	0	0	0	0	0	0	0	0	0	0	0	0	0	0	0	0	0	0	0	0	0	0	0	0	0	0	0	0
d__Eukaryota;p__Streptophyta;c__Magnoliopsida;o__Brassicales;f__Brassicaceae;g__Streptanthus;s__Streptanthusglandulosus	0	0	0	0	0	0	0	0	0	0	0	0	0	0	0	0	0	0	0	0	0	0	0	0	0	0	0	0	0	0	0	0	0	0	0	0	0	0	0	3	0	0	0	0	0	0	0	0	0
d__Eukaryota;p__Streptophyta;c__Magnoliopsida;o__Caryophyllales;f__Amaranthaceae;g__Alternanthera;s__Alternantheraparonychioides	0	0	0	0	0	0	0	0	0	0	0	0	0	0	0	0	0	0	0	0	0	0	0	0	0	0	0	0	0	0	0	0	0	0	0	0	0	0	0	0	0	0	0	0	0	0	0	0	0
d__Eukaryota;p__Streptophyta;c__Magnoliopsida;o__Caryophyllales;f__Chenopodiaceae;g__Atriplex;s__Atriplextorreyi	0	0	0	0	0	0	0	0	0	1	0	0	0	0	0	0	0	0	0	0	0	0	0	0	0	0	0	0	0	0	0	0	0	0	0	0	0	0	0	0	0	0	0	0	0	0	0	0	0
d__Eukaryota;p__Streptophyta;c__Magnoliopsida;o__Caryophyllales;f__Chenopodiaceae;g__Bassia;s__Bassiaeriophora	0	0	0	0	0	0	0	0	0	0	0	0	0	0	0	0	0	0	0	0	0	0	0	0	0	0	0	0	0	0	0	0	0	0	0	0	0	0	0	0	0	0	0	0	0	0	0	0	0
d__Eukaryota;p__Streptophyta;c__Magnoliopsida;o__Caryophyllales;f__Chenopodiaceae;g__Chenopodium;s__Chenopodiumallanii	0	0	0	0	0	0	0	0	0	0	0	0	0	0	0	0	0	0	0	0	0	0	0	0	0	0	0	0	0	0	0	0	0	0	0	0	0	0	0	0	0	0	0	0	0	0	0	0	0
d__Eukaryota;p__Streptophyta;c__Magnoliopsida;o__Caryophyllales;f__Chenopodiaceae;g__Suaeda;s__Suaedanigra	0	0	0	0	0	0	0	0	0	0	0	2	0	0	0	0	0	0	0	0	0	0	0	0	0	0	0	0	0	0	0	0	0	0	0	0	0	0	0	0	0	0	0	0	0	0	0	0	0
d__Eukaryota;p__Streptophyta;c__Magnoliopsida;o__Caryophyllales;f__Polygonaceae;g__Fallopia;s__Fallopiaforbesii	0	0	0	0	0	0	0	0	0	0	0	0	0	0	0	0	0	0	0	0	0	0	0	0	0	0	0	0	0	0	0	0	0	0	0	0	0	0	0	0	0	0	0	0	0	0	0	0	0
d__Eukaryota;p__Streptophyta;c__Magnoliopsida;o__Caryophyllales;f__Polygonaceae;g__Persicaria;s__Persicariahastatosagittata	0	0	0	0	0	0	0	0	0	0	0	0	0	0	0	0	0	0	0	0	0	0	0	0	0	0	0	0	0	0	0	0	0	0	0	0	0	0	0	0	0	0	0	0	0	0	0	0	0
d__Eukaryota;p__Streptophyta;c__Magnoliopsida;o__Caryophyllales;f__Polygonaceae;g__Rumex;s__Rumexacetosella	0	0	0	0	0	0	0	0	0	0	0	0	0	0	0	0	0	0	0	0	0	0	0	0	0	0	0	0	0	0	0	0	0	0	0	0	0	0	0	0	0	0	0	0	0	0	0	0	0
d__Eukaryota;p__Streptophyta;c__Magnoliopsida;o__Dipsacales;f__Caprifoliaceae;g__Lonicera;s__Lonicerajaponica	0	0	0	0	0	0	0	0	0	0	0	0	0	0	0	0	0	0	0	0	0	0	0	0	0	0	0	0	0	0	0	0	0	0	0	0	0	0	0	0	0	0	0	0	0	0	0	0	0
d__Eukaryota;p__Streptophyta;c__Magnoliopsida;o__Fabales;f__Fabaceae;g__Guianodendron;s__Guianodendronpraeclarum	0	0	0	0	0	0	0	0	0	0	0	0	0	0	0	0	0	0	0	0	0	0	0	0	0	0	0	0	0	0	0	0	0	0	0	0	0	0	0	0	0	0	0	0	0	0	0	0	0
d__Eukaryota;p__Streptophyta;c__Magnoliopsida;o__Fabales;f__Fabaceae;g__Vicia;s__Viciaorobus	0	0	0	0	0	0	0	0	0	0	0	0	0	0	0	0	0	0	0	0	0	0	0	0	0	0	0	0	0	0	0	0	0	0	0	0	0	0	0	0	0	0	0	0	0	0	0	0	0
d__Eukaryota;p__Streptophyta;c__Magnoliopsida;o__Fabales;f__Fabaceae;g__Vigna;s__Vignavexillata	0	0	0	0	0	0	0	0	0	0	0	0	0	0	0	0	0	0	0	0	0	0	0	0	0	0	0	0	0	0	0	0	0	0	0	0	0	0	0	0	0	0	0	0	0	0	0	0	0
d__Eukaryota;p__Streptophyta;c__Magnoliopsida;o__Fagales;f__Fagaceae;g__Quercus;s__Quercusbaronii	0	0	0	0	0	0	0	0	0	0	0	0	0	0	0	0	0	0	0	0	0	0	0	0	0	0	0	0	0	0	0	0	0	0	0	0	0	0	0	0	0	0	0	0	0	0	0	0	0
d__Eukaryota;p__Streptophyta;c__Magnoliopsida;o__Fagales;f__Fagaceae;g__Quercus;s__Quercusrobur	0	0	0	0	0	0	0	0	0	0	0	0	0	0	0	0	0	0	0	0	0	0	0	0	0	0	0	0	0	0	0	0	0	0	0	0	0	0	0	0	0	0	0	0	0	0	0	0	0
d__Eukaryota;p__Streptophyta;c__Magnoliopsida;o__Gentianales;f__Rubiaceae;g__Rubia;s__Rubiasp.YX-2018	0	0	0	0	0	0	0	0	0	0	0	0	0	0	0	0	0	0	0	0	0	0	0	0	0	0	0	0	0	0	0	0	0	0	0	0	0	0	0	0	0	0	0	0	0	0	0	0	0
d__Eukaryota;p__Streptophyta;c__Magnoliopsida;o__Lamiales;f__Lamiaceae;g__Salvia;s__Salviafimbriaticalyx	0	0	0	0	0	0	0	0	0	0	0	0	0	0	0	0	0	0	0	0	0	0	0	0	0	0	0	0	0	0	0	0	0	0	0	0	0	0	0	0	0	0	0	0	0	0	0	0	0
d__Eukaryota;p__Streptophyta;c__Magnoliopsida;o__Lamiales;f__Oleaceae;g__Fraxinus;s__Fraxinusbungeana	0	0	0	0	0	0	0	0	0	0	0	0	0	0	0	0	0	0	0	0	0	0	0	0	0	0	0	0	0	0	0	0	0	0	0	0	0	0	0	0	0	0	0	0	0	0	0	0	0
d__Eukaryota;p__Streptophyta;c__Magnoliopsida;o__Lamiales;f__Plantaginaceae;g__Veronica;s__Veronicagracilis	0	0	0	0	0	0	0	0	0	0	0	0	0	0	0	0	0	0	0	0	0	0	0	0	0	0	0	0	0	0	0	0	0	1	0	0	0	0	0	0	0	0	0	0	0	0	0	0	0
d__Eukaryota;p__Streptophyta;c__Magnoliopsida;o__Myrtales;f__Lythraceae;g__Punica;s__Punicagranatum	0	0	0	0	0	0	0	0	0	0	0	0	0	0	0	0	0	0	0	0	0	0	0	0	0	0	0	0	0	0	0	0	0	0	0	0	0	0	0	0	0	0	0	0	0	0	0	0	0
d__Eukaryota;p__Streptophyta;c__Magnoliopsida;o__Poales;f__Cyperaceae;g__Carex;s__Carexnubigena	0	0	0	0	0	0	0	0	0	0	0	0	0	0	0	0	0	0	0	0	0	0	0	0	0	0	0	0	0	0	0	0	0	0	0	0	0	0	0	0	0	0	0	0	0	0	0	0	0
d__Eukaryota;p__Streptophyta;c__Magnoliopsida;o__Poales;f__Cyperaceae;g__Isolepis;s__Isolepissetacea	0	0	0	0	0	0	0	0	0	0	0	0	0	0	0	0	0	0	0	0	0	0	0	0	0	0	0	0	0	0	0	0	0	0	0	0	0	0	0	0	0	0	0	0	0	0	0	0	0
d__Eukaryota;p__Streptophyta;c__Magnoliopsida;o__Poales;f__Poaceae;g__Bothriochloa;s__Bothriochloaischaemum	0	0	0	0	0	0	0	0	0	0	0	0	0	0	0	0	0	0	0	0	0	0	0	0	0	0	0	0	0	0	0	0	0	0	0	0	0	0	0	0	0	0	0	0	0	0	0	0	0
d__Eukaryota;p__Streptophyta;c__Magnoliopsida;o__Poales;f__Poaceae;g__Oryza;s__Oryzameridionalis	0	0	0	0	0	0	0	0	0	0	0	0	0	0	0	0	0	0	0	0	0	0	0	0	0	0	0	0	0	0	0	0	0	0	0	0	0	0	0	0	0	0	0	0	0	0	0	0	0
d__Eukaryota;p__Streptophyta;c__Magnoliopsida;o__Poales;f__Poaceae;g__Sorghum;s__Sorghumbicolor	0	0	0	0	0	0	0	0	0	0	0	0	0	0	0	0	0	0	0	0	0	0	0	0	0	0	0	0	0	0	0	0	0	0	0	0	0	0	0	0	0	0	0	0	0	0	0	0	0
d__Eukaryota;p__Streptophyta;c__Magnoliopsida;o__Ranunculales;f__Ranunculaceae;g__Clematis;s__Clematismandshurica	0	0	0	0	0	0	0	0	0	0	0	0	0	0	0	0	0	0	0	0	0	0	0	0	0	0	0	0	0	0	0	0	0	0	0	0	0	0	0	0	0	0	0	0	0	0	0	0	0
d__Eukaryota;p__Streptophyta;c__Magnoliopsida;o__Ranunculales;f__Ranunculaceae;g__Ranunculus;s__Ranunculusflammula	0	0	0	0	0	0	0	0	0	0	0	0	0	0	0	0	0	1	0	0	0	0	0	0	0	0	0	0	0	1	0	0	0	0	0	1	0	0	0	0	0	0	0	0	0	0	0	0	0
d__Eukaryota;p__Streptophyta;c__Magnoliopsida;o__Ranunculales;f__Ranunculaceae;g__Thalictrum;s__Thalictrumminus	0	0	0	0	0	0	0	0	0	0	0	0	0	0	0	0	0	0	0	0	0	0	0	0	0	0	0	0	0	0	0	0	0	0	0	0	0	0	0	0	0	0	0	0	0	0	0	0	0
d__Eukaryota;p__Streptophyta;c__Magnoliopsida;o__Rosales;f__Cannabaceae;g__Celtis;s__Celtiskunmingensis	0	0	0	0	0	0	0	0	0	0	0	0	0	0	0	0	0	0	0	0	0	0	0	0	0	0	0	0	0	0	0	0	0	0	0	0	0	0	0	0	0	0	0	0	0	0	0	0	0
d__Eukaryota;p__Streptophyta;c__Magnoliopsida;o__Rosales;f__Elaeagnaceae;g__Hippophae;s__Hippophaetibetana	0	0	0	0	0	0	0	0	0	0	0	0	0	0	0	0	0	0	0	0	0	0	0	0	0	0	0	0	0	0	0	0	0	0	0	0	0	0	0	0	0	0	0	0	0	0	0	0	0
d__Eukaryota;p__Streptophyta;c__Magnoliopsida;o__Rosales;f__Moraceae;g__Artocarpus;s__Artocarpusheterophyllus	0	0	0	0	0	0	0	0	0	0	0	0	0	0	0	0	0	0	0	0	0	0	0	0	0	0	0	0	0	0	0	0	0	0	0	0	0	0	0	0	0	0	0	0	0	0	0	0	0
d__Eukaryota;p__Streptophyta;c__Magnoliopsida;o__Rosales;f__Rhamnaceae;g__Rhamnus;s__Rhamnuspersica	0	0	0	0	0	0	0	0	0	0	0	0	0	0	0	0	0	0	0	0	0	0	0	0	0	0	0	0	0	0	0	0	0	0	0	0	0	0	0	0	0	0	0	0	0	0	0	0	0
d__Eukaryota;p__Streptophyta;c__Magnoliopsida;o__Rosales;f__Rosaceae;g__Fragaria;s__Fragariachiloensis	0	0	0	0	0	0	0	0	0	0	0	0	0	0	0	0	0	0	0	0	0	0	0	0	0	0	0	0	0	0	0	0	0	0	0	0	0	0	0	0	0	0	0	0	0	0	0	0	0
d__Eukaryota;p__Streptophyta;c__Magnoliopsida;o__Rosales;f__Rosaceae;g__Fragaria;s__Fragarianubicola	0	0	0	0	0	0	0	0	0	0	0	0	0	0	0	0	0	0	0	0	0	0	0	0	0	0	0	0	0	0	0	0	0	0	0	0	0	0	0	0	0	0	0	0	0	0	0	0	0
d__Eukaryota;p__Streptophyta;c__Magnoliopsida;o__Rosales;f__Rosaceae;g__Potentilla;s__Potentillahippiana	0	0	0	0	0	0	0	0	0	0	0	0	0	0	0	0	0	0	0	0	0	0	0	0	0	0	0	0	0	0	0	0	0	0	0	0	0	0	0	0	0	0	0	0	0	0	0	0	0
d__Eukaryota;p__Streptophyta;c__Magnoliopsida;o__Rosales;f__Rosaceae;g__Potentilla;s__Potentillanorvegica	0	0	0	0	0	0	0	0	0	0	0	0	0	0	0	0	0	0	0	0	0	0	0	0	0	0	0	0	0	0	0	0	0	0	0	0	0	0	0	0	0	0	0	0	0	0	0	0	0
d__Eukaryota;p__Streptophyta;c__Magnoliopsida;o__Rosales;f__Rosaceae;g__Rosa;s__Rosamultiflora	0	0	0	0	0	0	0	0	0	0	0	0	0	0	0	0	0	0	0	0	0	0	0	0	0	0	0	0	0	0	0	0	0	0	0	0	0	0	0	0	0	0	0	0	0	0	0	0	0
d__Eukaryota;p__Streptophyta;c__Magnoliopsida;o__Rosales;f__Rosaceae;g__Sorbus;s__Sorbuscommixta	0	0	0	0	0	0	0	0	0	0	0	0	0	0	0	0	0	0	0	0	0	0	0	0	0	0	0	0	0	0	0	0	0	0	0	0	0	0	0	0	0	0	0	0	0	0	0	0	0
d__Eukaryota;p__Streptophyta;c__Magnoliopsida;o__Rosales;f__Rosaceae;g__Spiraea;s__Spiraeablumei	0	0	0	0	0	0	0	0	0	0	0	0	0	0	0	0	0	0	0	0	0	0	0	0	0	0	0	0	0	0	0	0	0	0	0	0	0	0	0	0	0	0	0	0	0	0	0	0	0
d__Eukaryota;p__Streptophyta;c__Magnoliopsida;o__Rosales;f__Ulmaceae;g__Ulmus;s__Ulmuslamellosa	0	0	0	0	0	0	0	0	0	0	0	0	0	0	0	0	0	0	0	0	0	0	0	0	0	0	0	0	0	0	0	0	0	0	0	0	0	0	0	0	0	0	0	0	0	0	0	0	0
d__Eukaryota;p__Streptophyta;c__Magnoliopsida;o__Rosales;f__Urticaceae;g__Archiboehmeria;s__Archiboehmeriaatrata	0	0	0	0	0	0	0	0	0	0	0	0	0	0	0	0	0	0	0	0	0	0	0	0	0	0	0	0	0	0	0	0	0	0	0	0	0	0	0	0	0	0	0	0	0	0	0	0	0
d__Eukaryota;p__Streptophyta;c__Magnoliopsida;o__Santalales;f__Cervantesiaceae;g__Pyrularia;s__Pyrulariasinensis	0	0	0	0	0	0	0	0	0	0	0	0	0	0	0	0	0	0	0	0	0	0	0	0	0	0	0	0	0	0	0	0	0	0	0	0	0	0	0	0	0	0	0	0	0	0	0	0	0
d__Eukaryota;p__Streptophyta;c__Magnoliopsida;o__Sapindales;f__Burseraceae;g__Bursera;s__Burseramorelensis	0	0	0	0	0	0	0	0	0	0	0	0	0	0	0	0	0	0	0	0	0	0	0	0	0	0	0	0	0	0	0	0	0	0	0	0	0	0	0	0	0	0	0	0	0	0	0	0	0
d__Eukaryota;p__Streptophyta;c__Magnoliopsida;o__Sapindales;f__Rutaceae;g__Citrus;s__Citrusaurantium	0	0	0	0	0	0	0	0	0	0	0	0	0	0	0	0	0	0	0	0	0	0	0	0	0	0	0	0	0	0	0	0	0	0	0	0	0	0	0	0	0	0	0	0	0	0	0	0	0
d__Eukaryota;p__Streptophyta;c__Magnoliopsida;o__Solanales;f__Convolvulaceae;g__Ipomoea;s__Ipomoeaarborescens	0	0	0	0	0	0	0	0	0	0	0	0	0	0	0	0	0	0	0	0	0	0	0	0	0	0	0	0	0	0	0	0	0	0	0	0	0	0	0	0	0	0	0	0	0	0	0	0	0
d__Eukaryota;p__Streptophyta;c__Pinopsida;o__Pinales;f__Pinaceae;g__Picea;s__Piceaglauca	0	0	0	0	0	0	0	0	0	0	0	0	0	0	0	0	0	0	0	0	0	0	0	0	0	0	0	0	0	0	0	0	0	0	0	0	0	0	0	0	0	0	0	0	0	0	0	0	0
d__Eukaryota;p__Streptophyta;c__Magnoliopsida;o__Apiales;f__Apiaceae;g__Bupleurum;s__Bupleurumstenophyllum	0	0	0	0	0	0	0	0	0	0	0	0	0	0	0	0	0	0	0	0	0	0	0	0	0	0	0	0	0	0	0	0	0	0	0	0	0	0	0	0	0	0	0	0	0	0	0	0	0
d__Eukaryota;p__Streptophyta;c__Magnoliopsida;o__Apiales;f__Apiaceae;g__Cymopterus;s__Cymopterusfilifolius	0	0	0	0	0	0	0	0	0	0	0	0	0	0	0	0	0	0	0	0	0	0	0	0	0	0	0	0	0	0	0	0	0	0	0	0	0	0	0	0	0	0	0	0	0	0	0	0	0
d__Eukaryota;p__Streptophyta;c__Magnoliopsida;o__Apiales;f__Apiaceae;g__Oreocome;s__Oreocomehindukushensis	0	0	0	0	0	0	0	0	0	0	0	0	0	0	0	0	0	0	0	0	0	0	0	0	0	0	0	0	0	0	0	0	0	0	0	0	0	0	0	0	0	0	0	0	0	0	0	0	0
d__Eukaryota;p__Streptophyta;c__Magnoliopsida;o__Apiales;f__Apiaceae;g__Peucedanum;s__Peucedanumofficinale	0	0	0	0	0	0	0	0	0	0	0	0	0	0	0	0	0	0	0	0	0	0	0	0	0	0	0	0	0	0	0	0	0	0	0	0	0	0	0	0	0	0	0	0	0	0	0	0	0
d__Eukaryota;p__Streptophyta;c__Magnoliopsida;o__Asterales;f__Asteraceae;g__Ambrosia;s__Ambrosiaartemisiifolia	0	0	0	0	0	0	0	0	0	0	0	0	0	0	0	0	0	0	0	0	0	0	0	0	0	0	0	0	0	0	0	0	0	0	0	0	0	0	0	0	0	0	0	0	0	0	0	0	0
d__Eukaryota;p__Streptophyta;c__Magnoliopsida;o__Asterales;f__Asteraceae;g__Ambrosia;s__Ambrosiamonogyra	0	0	0	0	0	0	0	0	0	0	0	0	0	0	0	0	0	0	0	0	0	0	0	0	0	0	0	0	0	0	0	0	0	0	0	0	0	0	0	0	0	0	0	0	0	0	0	0	0
d__Eukaryota;p__Streptophyta;c__Magnoliopsida;o__Asterales;f__Asteraceae;g__Artemisia;s__Artemisianesiotica	0	0	0	0	0	0	0	0	0	0	0	0	0	0	0	0	0	0	0	0	0	0	0	0	0	0	0	0	0	0	0	0	0	0	0	0	0	0	0	0	0	0	0	0	0	0	0	0	0
d__Eukaryota;p__Streptophyta;c__Magnoliopsida;o__Asterales;f__Asteraceae;g__Myxopappus;s__Myxopappusacutilobus	0	0	0	0	0	0	0	0	0	0	0	0	0	0	0	0	0	0	0	0	0	0	0	0	0	0	0	0	0	0	0	0	0	0	0	0	0	0	0	0	0	0	0	0	0	0	0	0	0
d__Eukaryota;p__Streptophyta;c__Magnoliopsida;o__Asterales;f__Asteraceae;g__Nivellea;s__Nivelleanivellei	0	0	0	0	0	0	0	0	0	0	0	0	0	0	2	0	0	0	0	0	0	0	0	0	0	0	0	0	0	0	0	0	0	0	0	0	0	0	0	0	0	0	0	0	0	0	0	0	0
d__Eukaryota;p__Streptophyta;c__Magnoliopsida;o__Asterales;f__Asteraceae;g__Parthenium;s__Partheniumincanum	0	0	0	0	0	0	0	0	0	0	0	0	0	0	0	0	0	0	0	0	0	0	0	0	0	0	0	0	0	0	0	0	0	0	0	0	0	0	0	0	0	0	0	0	0	0	0	0	0
d__Eukaryota;p__Streptophyta;c__Magnoliopsida;o__Asterales;f__Asteraceae;g__Pentanema;s__Pentanemaaschersonianum	0	0	0	0	0	0	0	0	0	0	0	0	0	0	0	0	0	0	0	0	0	0	0	0	0	0	0	0	0	0	0	0	0	0	0	0	0	0	0	0	0	0	0	0	0	0	0	0	0
d__Eukaryota;p__Streptophyta;c__Magnoliopsida;o__Asterales;f__Asteraceae;g__Pentzia;s__Pentziacalcarea	0	0	0	0	0	0	0	0	0	0	0	0	0	0	0	0	0	0	0	0	0	0	0	0	0	0	0	0	0	0	0	0	0	0	0	0	0	0	0	0	0	0	0	0	0	0	0	0	0
d__Eukaryota;p__Streptophyta;c__Magnoliopsida;o__Asterales;f__Asteraceae;g__Rhodanthemum;s__Rhodanthemumkesticum	0	0	0	0	0	0	0	0	0	0	0	0	0	0	0	0	0	0	0	0	0	0	0	0	0	0	0	0	0	0	0	0	0	0	0	0	0	0	0	0	0	0	0	0	0	0	0	0	0
d__Eukaryota;p__Streptophyta;c__Magnoliopsida;o__Asterales;f__Asteraceae;g__Tridax;s__Tridaxprocumbens	0	0	0	0	0	0	0	0	0	0	0	0	0	0	0	0	0	0	0	0	0	0	0	0	0	0	0	0	0	0	0	0	0	0	0	0	0	0	0	0	0	0	0	0	0	0	0	0	0
d__Eukaryota;p__Streptophyta;c__Magnoliopsida;o__Asterales;f__Campanulaceae;g__Adenophora;s__Adenophoratrachelioides	0	0	0	0	0	0	0	0	0	0	0	0	0	0	0	0	0	0	0	0	0	0	0	0	0	0	0	0	0	0	0	0	0	0	0	0	0	0	0	0	0	0	0	0	0	0	0	0	0
d__Eukaryota;p__Streptophyta;c__Magnoliopsida;o__Brassicales;f__Brassicaceae;g__Armoracia;s__Armoraciarusticana	0	0	0	0	0	0	0	0	0	0	0	0	0	0	0	0	0	0	0	0	0	0	0	0	0	0	0	0	0	0	0	0	0	0	0	0	0	0	0	0	0	0	0	0	0	0	0	0	0
d__Eukaryota;p__Streptophyta;c__Magnoliopsida;o__Brassicales;f__Brassicaceae;g__Coincya;s__Coincyaricheri	0	0	0	0	0	0	0	0	0	0	0	0	0	0	0	0	0	0	0	0	0	0	0	0	0	0	0	0	0	0	0	0	0	0	0	0	0	0	0	0	0	0	0	0	0	1	0	0	0
d__Eukaryota;p__Streptophyta;c__Magnoliopsida;o__Brassicales;f__Brassicaceae;g__Lepidium;s__Lepidiumsativum	0	0	0	0	0	0	0	0	0	0	0	0	0	0	0	0	0	0	0	0	0	0	0	0	0	0	0	0	0	0	0	0	0	0	0	0	0	0	0	0	0	0	0	0	0	0	0	0	0
d__Eukaryota;p__Streptophyta;c__Magnoliopsida;o__Brassicales;f__Brassicaceae;g__Rorippa;s__Rorippaindica	0	0	0	0	0	0	0	0	0	0	0	0	0	0	0	0	0	0	0	0	0	0	0	0	0	0	0	0	0	0	0	0	0	0	0	0	0	0	0	0	0	0	0	0	0	0	0	0	0
d__Eukaryota;p__Streptophyta;c__Magnoliopsida;o__Brassicales;f__Brassicaceae;g__Sisymbrium;s__Sisymbriumloeselii	0	0	0	0	0	0	0	0	0	0	0	0	0	0	0	0	0	0	0	0	0	0	0	0	0	0	0	0	0	0	0	1	0	0	0	0	0	0	0	0	0	0	0	0	0	0	0	0	0
d__Eukaryota;p__Streptophyta;c__Magnoliopsida;o__Caryophyllales;f__Amaranthaceae;g__Amaranthus;s__Amaranthuscapensis	0	0	0	0	0	0	0	0	0	0	0	0	0	0	0	0	0	0	0	0	0	0	0	0	0	0	0	0	0	0	0	0	0	0	0	0	0	0	0	0	0	0	0	0	0	0	0	0	0
d__Eukaryota;p__Streptophyta;c__Magnoliopsida;o__Caryophyllales;f__Amaranthaceae;g__Amaranthus;s__Amaranthusrhombeus	0	0	0	0	0	0	0	0	0	0	0	0	0	0	0	0	0	0	0	0	0	0	0	0	0	0	0	0	0	0	0	0	0	0	0	0	0	0	0	0	0	0	0	0	0	0	0	0	0
d__Eukaryota;p__Streptophyta;c__Magnoliopsida;o__Caryophyllales;f__Amaranthaceae;g__Amaranthus;s__Amaranthustricolor	0	0	0	0	0	0	0	0	0	1	0	0	0	0	0	0	0	0	0	0	0	0	0	0	0	0	0	0	0	0	0	0	0	0	0	0	0	0	0	0	0	0	0	0	0	0	0	0	0
d__Eukaryota;p__Streptophyta;c__Magnoliopsida;o__Caryophyllales;f__Caryophyllaceae;g__Silene;s__Sileneaucheriana	0	0	0	0	0	0	0	0	0	0	0	0	0	0	0	0	0	0	0	0	0	0	0	0	0	0	0	0	0	0	0	0	0	0	0	0	0	0	0	0	0	0	0	0	0	0	0	0	0
d__Eukaryota;p__Streptophyta;c__Magnoliopsida;o__Caryophyllales;f__Chenopodiaceae;g__Salsola;s__Salsolagrandis	0	0	0	0	0	0	0	0	0	0	0	0	0	0	0	0	0	0	0	0	0	0	0	0	0	0	0	0	0	0	0	0	0	0	0	0	0	0	0	0	0	0	0	0	0	0	0	0	0
d__Eukaryota;p__Streptophyta;c__Magnoliopsida;o__Caryophyllales;f__Polygonaceae;g__Koenigia;s__Koenigiamollis	0	0	0	0	0	0	0	0	0	0	0	0	0	0	0	0	0	0	0	0	0	0	0	0	0	0	0	0	0	0	0	0	0	0	0	0	0	0	0	0	0	0	0	0	0	0	0	0	0
d__Eukaryota;p__Streptophyta;c__Magnoliopsida;o__Caryophyllales;f__Polygonaceae;g__Rumex;s__Rumexelbrusensis	0	0	0	0	0	0	0	0	0	0	0	0	0	0	0	0	0	0	0	0	0	0	0	0	0	0	0	0	1	0	0	0	0	0	0	0	0	0	0	0	0	0	0	0	0	0	0	0	0
d__Eukaryota;p__Streptophyta;c__Magnoliopsida;o__Celastrales;f__Celastraceae;g__Celastrus;s__Celastrusangulatus	0	0	0	0	0	0	0	0	0	0	0	0	0	0	0	0	1	0	0	0	0	0	0	0	0	0	0	0	0	0	0	0	0	0	0	0	0	0	0	0	0	0	0	0	0	0	0	0	0
d__Eukaryota;p__Streptophyta;c__Magnoliopsida;o__Celastrales;f__Celastraceae;g__Parnassia;s__Parnassiapalustris	0	0	0	0	0	0	0	0	0	0	0	0	0	0	0	0	0	0	0	0	0	0	0	0	0	0	0	0	0	0	0	0	0	0	0	0	0	0	0	0	0	0	0	0	0	0	0	0	0
d__Eukaryota;p__Streptophyta;c__Magnoliopsida;o__Cucurbitales;f__Cucurbitaceae;g__Cucurbita;s__Cucurbitalundelliana	0	0	0	0	0	0	0	0	0	0	0	0	0	0	0	0	0	0	0	0	0	0	0	0	0	0	0	0	0	0	0	0	0	0	0	0	0	0	0	0	0	0	0	0	0	0	0	0	0
d__Eukaryota;p__Streptophyta;c__Magnoliopsida;o__Dipsacales;f__Adoxaceae;g__Sambucus;s__Sambucusnigra	0	0	0	0	0	0	0	0	0	0	0	0	0	0	0	0	0	0	0	0	0	0	0	0	0	0	0	0	0	0	0	0	0	0	0	0	0	0	0	0	0	0	0	0	0	0	0	0	0
d__Eukaryota;p__Streptophyta;c__Magnoliopsida;o__Dipsacales;f__Adoxaceae;g__Viburnum;s__Viburnumcarlesii	0	0	0	0	0	0	0	0	0	0	0	0	0	0	0	0	0	0	0	0	0	0	0	0	0	0	0	0	0	0	0	0	0	0	0	0	0	0	0	0	0	0	0	0	0	0	0	0	0
d__Eukaryota;p__Streptophyta;c__Magnoliopsida;o__Ericales;f__Actinidiaceae;g__Actinidia;s__Actinidiachinensis	0	0	0	0	0	0	0	0	0	0	0	0	0	0	0	0	0	0	0	0	0	0	0	0	0	0	0	0	0	0	0	0	0	0	0	0	0	0	0	0	0	0	0	0	0	0	0	0	0
d__Eukaryota;p__Streptophyta;c__Magnoliopsida;o__Ericales;f__Primulaceae;g__Lysimachia;s__Lysimachiaclethroides	0	0	0	0	0	0	0	0	0	0	0	0	0	0	0	0	0	2	0	0	0	0	0	0	0	0	0	0	0	0	0	0	0	0	0	0	0	0	0	0	0	0	0	0	0	0	0	0	0
d__Eukaryota;p__Streptophyta;c__Magnoliopsida;o__Fabales;f__Fabaceae;g__Caragana;s__Caraganaarborescens	0	0	0	0	0	0	0	0	0	0	0	0	0	0	0	0	0	0	0	0	0	0	0	0	0	0	0	0	0	0	0	0	0	0	0	0	0	0	0	0	0	0	0	0	0	0	0	0	0
d__Eukaryota;p__Streptophyta;c__Magnoliopsida;o__Fabales;f__Fabaceae;g__Caragana;s__Caraganamicrophylla	0	0	0	0	0	0	0	0	0	0	0	0	0	0	0	0	0	0	0	0	0	0	0	0	0	0	0	0	0	0	0	0	0	0	0	0	0	0	0	0	0	0	0	0	0	0	0	0	0
d__Eukaryota;p__Streptophyta;c__Magnoliopsida;o__Fabales;f__Fabaceae;g__Dalbergia;s__Dalbergiasissoo	0	0	0	0	0	0	0	0	0	0	0	0	0	0	0	0	0	0	0	0	0	0	0	0	0	0	0	0	0	0	0	0	0	0	0	0	0	0	0	0	0	0	0	0	0	0	0	0	0
d__Eukaryota;p__Streptophyta;c__Magnoliopsida;o__Fabales;f__Fabaceae;g__Vicia;s__Viciaaucheri	0	0	0	0	0	0	0	0	0	0	0	0	0	0	0	0	0	0	0	0	0	0	0	0	0	0	0	0	0	0	0	0	0	0	0	0	0	0	0	0	0	0	0	0	0	0	0	0	0
d__Eukaryota;p__Streptophyta;c__Magnoliopsida;o__Fagales;f__Betulaceae;g__Alnus;s__Alnussubcordata	0	0	0	0	0	0	0	0	0	0	0	0	0	0	0	0	0	0	0	0	0	0	0	0	0	0	0	0	0	0	0	0	0	0	0	0	0	0	0	0	0	0	0	0	0	0	0	0	0
d__Eukaryota;p__Streptophyta;c__Magnoliopsida;o__Gentianales;f__Rubiaceae;g__Rubia;s__Rubiaalata	0	0	0	0	0	0	0	0	0	0	0	0	0	0	0	0	0	0	0	0	0	0	0	0	0	0	0	0	0	0	0	0	0	0	0	0	0	0	0	0	0	0	0	0	0	0	0	0	0
d__Eukaryota;p__Streptophyta;c__Magnoliopsida;o__Gentianales;f__Rubiaceae;g__Rubia;s__Rubiaargyi	0	0	0	0	0	0	0	0	0	0	0	0	0	0	0	0	0	0	0	0	0	0	0	0	0	0	0	0	0	0	0	0	0	0	0	0	0	0	0	0	0	0	0	0	0	0	0	0	0
d__Eukaryota;p__Streptophyta;c__Magnoliopsida;o__Lamiales;f__Lamiaceae;g__Pseudodictamnus;s__Pseudodictamnusafricanus	0	0	0	0	0	0	0	0	0	0	0	0	0	0	0	0	0	0	0	0	0	0	0	0	0	0	0	0	0	0	0	0	0	0	0	0	0	0	0	0	0	0	0	0	0	0	0	0	0
d__Eukaryota;p__Streptophyta;c__Magnoliopsida;o__Lamiales;f__Plantaginaceae;g__Plantago;s__Plantagoaristata	0	0	0	0	0	0	0	0	0	0	0	0	0	0	0	0	0	0	0	0	0	0	0	0	0	0	0	0	0	0	0	0	0	0	0	0	0	0	0	0	0	0	0	0	0	0	0	0	0
d__Eukaryota;p__Streptophyta;c__Magnoliopsida;o__Lamiales;f__Plantaginaceae;g__Veronica;s__Veronicahederifolia	0	0	0	0	0	0	0	0	0	0	0	0	0	0	0	0	0	0	0	0	0	0	0	0	0	0	0	0	0	0	0	0	0	0	0	0	0	0	0	0	0	0	0	0	0	0	0	0	0
d__Eukaryota;p__Streptophyta;c__Magnoliopsida;o__Malpighiales;f__Passifloraceae;g__Passiflora;s__Passifloraedulis	0	0	0	0	0	0	0	0	0	0	0	0	0	0	0	0	0	0	0	0	0	0	0	0	0	0	0	0	0	0	0	0	0	0	0	0	0	0	0	0	0	0	0	0	0	0	0	0	0
d__Eukaryota;p__Streptophyta;c__Magnoliopsida;o__Malpighiales;f__Salicaceae;g__Populus;s__Populusxcanadensis	0	0	0	0	0	0	0	0	0	0	0	0	0	0	0	0	0	0	0	0	0	0	0	0	0	0	0	0	0	0	0	0	0	0	0	0	0	0	0	0	0	0	0	0	0	0	0	0	2
d__Eukaryota;p__Streptophyta;c__Magnoliopsida;o__Malvales;f__Malvaceae;g__Cienfuegosia;s__Cienfuegosiaheterophylla	0	0	0	0	0	0	0	0	0	0	0	0	0	0	0	0	0	0	0	0	0	0	0	0	0	0	0	0	0	0	0	0	0	0	0	0	0	0	0	0	0	0	0	0	0	0	0	0	0
d__Eukaryota;p__Streptophyta;c__Magnoliopsida;o__Malvales;f__Malvaceae;g__Theobroma;s__Theobromacacao	0	0	0	0	0	0	0	0	0	0	0	0	0	0	0	0	0	0	0	0	0	0	0	0	0	0	0	0	0	0	0	0	0	0	0	0	0	0	0	0	0	0	0	0	0	0	0	0	0
d__Eukaryota;p__Streptophyta;c__Magnoliopsida;o__Myrtales;f__Onagraceae;g__Oenothera;s__Oenotheraglaucifolia	0	0	0	0	0	0	0	0	0	0	0	0	0	0	0	0	0	0	0	0	0	0	0	0	0	0	0	0	0	0	0	0	0	0	0	0	0	0	0	0	0	0	0	0	0	0	0	0	0
d__Eukaryota;p__Streptophyta;c__Magnoliopsida;o__Poales;f__Poaceae;g__Poa;s__Poapratensis	0	0	0	0	0	0	0	0	0	0	0	0	0	0	0	0	0	0	0	0	0	0	0	0	0	0	0	0	0	0	0	0	0	0	0	0	0	0	0	0	0	0	0	0	0	0	0	0	0
d__Eukaryota;p__Streptophyta;c__Magnoliopsida;o__Ranunculales;f__Ranunculaceae;g__Ranunculus;s__Ranunculusbrotherusii	0	0	0	0	0	0	0	0	0	0	0	0	0	0	0	0	0	0	0	0	0	0	0	1	0	0	0	0	0	0	0	0	0	0	0	0	0	0	0	0	0	0	0	0	0	0	0	0	0
d__Eukaryota;p__Streptophyta;c__Magnoliopsida;o__Ranunculales;f__Ranunculaceae;g__Ranunculus;s__Ranunculusfluitans	0	0	0	0	0	0	0	0	0	0	0	0	0	0	0	0	0	0	0	0	0	0	0	1	0	0	0	0	0	0	0	0	0	0	0	0	0	0	0	0	0	0	0	0	0	0	0	0	0
d__Eukaryota;p__Streptophyta;c__Magnoliopsida;o__Ranunculales;f__Ranunculaceae;g__Ranunculus;s__Ranunculussardous	0	0	0	0	0	0	0	0	0	0	0	0	0	0	0	0	0	0	0	0	0	0	0	0	0	0	0	0	0	1	0	0	0	0	0	0	0	0	1	0	0	0	0	0	0	0	0	0	0
d__Eukaryota;p__Streptophyta;c__Magnoliopsida;o__Rosales;f__Moraceae;g__Morus;s__Morusrubra	0	0	0	0	0	0	0	0	0	0	0	0	0	0	0	0	0	0	0	0	0	0	0	0	0	0	0	0	0	0	0	0	0	0	0	0	0	0	0	0	0	0	0	0	0	0	0	0	0
d__Eukaryota;p__Streptophyta;c__Magnoliopsida;o__Rosales;f__Rhamnaceae;g__Alphitonia;s__Alphitoniazizyphoides	0	0	0	0	0	0	0	0	0	0	0	0	0	0	0	0	0	0	0	0	0	0	0	0	0	0	0	0	0	0	0	0	0	0	0	0	0	0	0	0	0	0	0	0	0	0	0	0	0
d__Eukaryota;p__Streptophyta;c__Magnoliopsida;o__Rosales;f__Rosaceae;g__Cliffortia;s__Cliffortiacomplanata	0	0	0	0	0	0	0	0	0	0	0	0	0	0	0	0	0	0	0	0	0	0	0	0	0	0	0	0	0	0	0	0	0	0	0	0	0	0	0	0	0	0	0	0	0	0	0	0	0
d__Eukaryota;p__Streptophyta;c__Magnoliopsida;o__Rosales;f__Rosaceae;g__Potentilla;s__Potentillacrinita	0	0	0	0	0	0	0	0	0	0	0	0	0	0	0	0	0	0	0	0	0	0	0	0	0	0	0	0	0	0	0	0	0	0	0	0	0	0	0	0	0	0	0	0	0	0	0	0	0
d__Eukaryota;p__Streptophyta;c__Magnoliopsida;o__Rosales;f__Rosaceae;g__Potentilla;s__Potentillaflabellata	0	0	0	0	0	0	0	0	0	0	0	0	0	0	0	0	0	0	0	0	0	0	0	0	0	0	0	0	0	0	0	0	0	0	0	0	0	0	0	0	0	0	0	0	0	0	0	0	0
d__Eukaryota;p__Streptophyta;c__Magnoliopsida;o__Rosales;f__Rosaceae;g__Potentilla;s__Potentillahebiichigo	0	0	0	0	0	0	0	0	0	0	0	0	0	0	0	0	0	0	0	0	0	0	0	0	0	0	0	0	0	0	0	0	0	0	0	0	0	0	0	0	0	0	0	0	0	0	0	0	0
d__Eukaryota;p__Streptophyta;c__Magnoliopsida;o__Rosales;f__Rosaceae;g__Potentilla;s__Potentillaoweriniana	0	0	0	0	0	0	0	0	0	0	0	0	0	0	0	0	0	0	0	0	0	0	0	0	0	0	0	0	0	0	0	0	0	0	0	0	0	0	0	0	0	0	0	0	0	0	0	0	0
d__Eukaryota;p__Streptophyta;c__Magnoliopsida;o__Rosales;f__Rosaceae;g__Potentilla;s__Potentillapulcherrima	0	0	0	0	0	0	0	0	0	0	0	0	0	0	0	0	0	0	0	0	0	0	0	0	0	0	0	0	0	0	0	0	0	0	0	0	0	0	0	0	0	0	0	0	0	0	0	0	0
d__Eukaryota;p__Streptophyta;c__Magnoliopsida;o__Rosales;f__Rosaceae;g__Rosa;s__Rosaxanthina	0	0	0	0	0	0	0	0	0	0	0	0	0	0	0	0	0	0	0	0	0	0	0	0	0	0	0	0	0	0	0	0	0	0	0	0	0	0	0	0	0	0	0	0	0	0	0	0	0
d__Eukaryota;p__Streptophyta;c__Magnoliopsida;o__Rosales;f__Rosaceae;g__Spiraea;s__Spiraeamedia	0	0	0	0	0	0	0	0	0	0	0	0	0	0	0	0	0	0	0	0	0	0	0	0	0	0	0	0	0	0	0	0	0	0	0	0	0	0	0	0	0	0	0	0	0	0	0	0	0
d__Eukaryota;p__Streptophyta;c__Magnoliopsida;o__Sapindales;f__Rutaceae;g__Vepris;s__Veprissp.MP668	0	0	0	0	0	0	0	0	0	0	0	0	0	0	0	0	0	0	0	0	0	0	0	0	0	0	0	0	0	0	0	0	0	0	0	0	0	0	0	0	0	0	0	0	0	0	0	0	0
d__Eukaryota;p__Streptophyta;c__Magnoliopsida;o__Sapindales;f__Simaroubaceae;g__Ailanthus;s__Ailanthustriphysus	0	0	0	0	0	0	0	0	0	0	0	0	0	0	0	0	0	0	0	0	0	0	0	0	0	0	0	0	0	0	0	0	0	0	0	0	0	0	0	0	0	0	0	0	0	0	0	0	0
d__Eukaryota;p__Streptophyta;c__Magnoliopsida;o__Solanales;f__Convolvulaceae;g__Calystegia;s__Calystegiatuguriorum	0	0	0	0	0	0	0	0	0	0	0	0	0	0	0	0	0	0	0	0	0	0	0	0	0	0	0	0	0	0	0	0	0	0	0	0	0	0	0	0	0	0	0	0	0	0	0	0	0
d__Eukaryota;p__Streptophyta;c__Magnoliopsida;o__Solanales;f__Solanaceae;g__Capsicum;s__CapsicumchinensexCapsicumfrutescens	0	0	0	0	0	0	0	0	0	0	0	0	0	0	0	0	0	0	0	0	0	0	0	0	0	0	0	0	0	0	0	0	0	0	0	0	0	0	0	0	0	0	0	0	0	0	0	0	0
d__Eukaryota;p__Streptophyta;c__Magnoliopsida;o__Solanales;f__Solanaceae;g__Deprea;s__Depreasachapapa	0	0	0	0	0	0	0	0	0	0	0	0	0	0	0	0	0	0	0	0	0	0	0	0	0	0	0	0	0	0	0	0	0	0	0	0	0	0	0	0	0	0	0	0	0	0	0	0	0
d__Eukaryota;p__Streptophyta;c__Magnoliopsida;o__Solanales;f__Solanaceae;g__Lycium;s__Lyciumruthenicum	0	0	0	0	0	0	0	0	0	0	0	0	0	0	0	0	0	0	0	0	0	0	0	0	0	0	0	0	0	0	0	0	0	0	0	0	0	0	0	0	0	0	0	0	0	0	0	0	0
d__Eukaryota;p__Streptophyta;c__Magnoliopsida;o__Solanales;f__Solanaceae;g__Nicandra;s__Nicandraphysalodes	0	0	0	0	0	0	0	0	0	0	0	0	0	0	0	0	0	0	0	0	0	0	0	0	0	0	0	0	0	0	0	0	0	0	0	0	0	0	0	0	0	0	0	0	0	0	0	0	0
d__Eukaryota;p__Streptophyta;c__Magnoliopsida;o__Solanales;f__Solanaceae;g__Salpichroa;s__Salpichroatristis	0	0	0	0	0	0	0	0	0	0	0	0	0	0	0	0	0	0	0	0	0	0	0	0	0	0	0	0	0	0	0	0	0	0	0	0	0	0	0	0	0	0	0	0	0	0	0	0	0
d__Eukaryota;p__Streptophyta;c__Pinopsida;o__Cupressales;f__Taxaceae;g__Torreya;s__Torreyajackii	0	0	0	0	0	0	0	0	0	0	0	0	0	0	0	0	0	0	0	0	0	0	0	0	0	0	0	0	0	0	0	0	0	0	0	0	0	0	0	0	0	0	0	0	0	0	0	0	0
d__Eukaryota;p__Streptophyta;c__Pinopsida;o__Cupressales;f__Taxaceae;g__Torreya;s__Torreyataxifolia	0	0	0	0	0	0	0	0	0	0	0	0	0	0	0	0	0	0	0	0	0	0	0	0	0	0	0	0	0	0	0	0	0	0	0	0	0	0	0	0	0	0	0	0	0	0	0	0	0
d__Eukaryota;p__Streptophyta;c__Pinopsida;o__Pinales;f__Pinaceae;g__Pinus;s__Pinusbungeana	0	0	0	0	0	0	0	0	0	0	0	0	0	0	0	0	0	0	0	0	0	0	0	0	0	0	0	0	0	0	0	0	0	0	0	0	0	0	0	0	0	0	0	0	0	0	0	0	0
d__Eukaryota;p__Streptophyta;c__Magnoliopsida;o__Proteales;f__Platanaceae;g__Platanus;s__Platanusxhispanica	0	0	0	0	0	0	0	0	0	0	0	0	0	0	0	0	0	0	0	0	0	0	0	0	0	0	0	0	0	0	0	0	0	0	0	0	0	0	0	0	0	0	0	1	0	0	0	0	0
d__Eukaryota;p__Streptophyta;c__Magnoliopsida;o__Alismatales;f__Alismataceae;g__Sagittaria;s__Sagittarialancifolia	0	0	0	0	0	0	0	0	0	0	0	0	0	0	0	0	0	0	0	0	0	0	0	0	0	0	0	0	0	0	0	0	0	0	0	0	0	0	0	0	0	0	0	0	0	0	0	0	0
d__Eukaryota;p__Streptophyta;c__Magnoliopsida;o__Alismatales;f__Araceae;g__Amorphophallus;s__Amorphophallusangulatus	0	0	0	0	0	0	0	0	0	0	0	0	0	0	0	0	0	0	0	0	0	0	0	0	0	0	0	0	0	0	0	0	0	0	0	0	0	0	0	0	0	0	0	0	0	0	0	0	0
d__Eukaryota;p__Streptophyta;c__Magnoliopsida;o__Alismatales;f__Potamogetonaceae;g__Potamogeton;s__Potamogetonxanguillanus	0	0	0	0	0	0	0	0	0	0	0	0	0	0	0	0	0	0	0	0	0	0	0	0	0	0	0	0	0	0	0	0	0	0	0	0	0	0	0	0	0	0	0	0	0	0	0	0	0
d__Eukaryota;p__Streptophyta;c__Magnoliopsida;o__Apiales;f__Apiaceae;g__Angelica;s__Angelicaczernaevia	0	0	0	0	0	0	0	0	0	0	0	0	0	0	0	0	0	0	0	0	0	0	0	0	0	0	0	0	0	0	0	0	0	0	0	0	0	0	0	0	0	0	0	0	0	0	0	0	0
d__Eukaryota;p__Streptophyta;c__Magnoliopsida;o__Apiales;f__Apiaceae;g__Bupleurum;s__Bupleurumchinense	0	0	0	0	0	0	0	0	0	0	0	0	0	0	0	0	0	0	0	0	0	0	0	0	0	0	0	0	0	0	0	0	0	0	0	0	0	0	0	0	0	0	0	0	0	0	0	0	0
d__Eukaryota;p__Streptophyta;c__Magnoliopsida;o__Apiales;f__Apiaceae;g__Glehnia;s__Glehnialittoralis	0	0	0	0	0	0	0	0	0	0	0	0	0	0	0	0	0	0	0	0	0	0	0	0	0	0	0	0	0	0	0	0	0	0	0	0	0	0	0	0	0	0	0	0	0	0	0	0	0
d__Eukaryota;p__Streptophyta;c__Magnoliopsida;o__Apiales;f__Apiaceae;g__Helosciadium;s__Helosciadiumxlongipedunculatum	0	0	0	0	0	0	0	0	0	0	0	0	0	0	0	0	0	0	0	0	0	0	0	0	0	0	0	0	0	0	0	0	0	0	0	0	0	0	0	0	0	0	0	0	0	0	0	0	0
d__Eukaryota;p__Streptophyta;c__Magnoliopsida;o__Apiales;f__Apiaceae;g__Pternopetalum;s__Pternopetalumdavidii	0	0	0	0	0	0	0	0	0	0	0	0	0	0	0	0	0	0	0	0	0	0	0	0	0	0	0	0	0	0	0	0	0	0	0	0	0	0	0	0	0	0	0	0	0	0	0	0	0
d__Eukaryota;p__Streptophyta;c__Magnoliopsida;o__Asparagales;f__Amaryllidaceae;g__Allium;s__Alliumsativum	0	0	0	0	0	0	0	0	0	0	0	0	0	0	0	0	0	0	0	0	0	0	0	0	0	0	0	0	0	0	0	0	0	0	0	0	0	0	0	0	0	0	0	0	0	0	0	0	0
d__Eukaryota;p__Streptophyta;c__Magnoliopsida;o__Asparagales;f__Asphodelaceae;g__Hemerocallis;s__Hemerocallisfulva	0	0	0	0	0	0	0	0	0	0	0	0	0	0	0	0	0	0	0	0	0	0	0	0	0	0	0	0	0	0	0	0	0	0	0	0	0	0	0	0	0	0	0	0	0	0	0	0	0
d__Eukaryota;p__Streptophyta;c__Magnoliopsida;o__Asparagales;f__Iridaceae;g__Iris;s__Irispseudacorus	0	0	0	0	0	0	0	0	0	0	0	0	0	0	0	0	0	0	0	0	0	0	0	0	0	0	0	0	0	0	0	0	0	0	0	0	0	0	0	0	0	0	0	0	0	0	0	0	0
d__Eukaryota;p__Streptophyta;c__Magnoliopsida;o__Asterales;f__Asteraceae;g__Ambrosia;s__Ambrosiaacanthicarpa	0	0	0	0	0	0	0	0	0	0	0	0	0	0	0	0	0	0	0	0	0	0	0	0	0	0	0	0	0	0	0	0	0	0	0	0	0	0	0	0	0	0	0	0	0	0	0	0	0
d__Eukaryota;p__Streptophyta;c__Magnoliopsida;o__Asterales;f__Asteraceae;g__Artemisia;s__Artemisiaabrotanum	0	0	0	0	0	0	0	0	0	0	0	0	0	0	0	0	0	0	0	0	0	0	0	0	0	0	0	0	0	0	0	0	0	0	0	0	0	0	0	0	0	0	0	0	0	0	0	0	0
d__Eukaryota;p__Streptophyta;c__Magnoliopsida;o__Asterales;f__Asteraceae;g__Artemisia;s__Artemisiaalpina	0	0	0	0	0	0	0	0	0	0	0	0	0	0	0	0	0	0	0	0	0	0	0	0	0	0	0	0	0	0	0	0	0	0	0	0	0	0	0	0	0	0	0	0	0	0	0	0	0
d__Eukaryota;p__Streptophyta;c__Magnoliopsida;o__Asterales;f__Asteraceae;g__Artemisia;s__Artemisiacaespitosa	0	0	0	0	0	0	0	0	0	0	0	0	0	0	0	0	0	0	0	0	0	0	0	0	0	0	0	0	0	0	0	0	0	0	0	0	0	0	0	0	0	0	0	0	0	0	0	0	0
d__Eukaryota;p__Streptophyta;c__Magnoliopsida;o__Asterales;f__Asteraceae;g__Artemisia;s__Artemisiacapitata	0	0	0	0	0	0	0	0	0	0	0	0	0	0	0	0	0	0	0	0	0	0	0	0	0	0	0	0	0	0	0	0	0	0	0	0	0	0	0	0	0	0	0	0	0	0	0	0	0
d__Eukaryota;p__Streptophyta;c__Magnoliopsida;o__Asterales;f__Asteraceae;g__Artemisia;s__Artemisiaeriopoda	0	0	0	0	0	0	0	0	0	0	0	0	0	0	0	0	0	0	0	0	0	0	0	0	0	0	0	0	0	0	0	0	0	0	0	0	0	0	0	0	0	0	0	0	0	0	0	0	0
d__Eukaryota;p__Streptophyta;c__Magnoliopsida;o__Asterales;f__Asteraceae;g__Artemisia;s__Artemisiagorgonum	0	0	0	0	0	0	0	0	0	0	0	0	0	0	0	0	0	0	0	0	0	0	0	0	0	0	0	0	0	0	0	0	0	0	0	0	0	0	0	0	0	0	0	0	0	0	0	0	0
d__Eukaryota;p__Streptophyta;c__Magnoliopsida;o__Asterales;f__Asteraceae;g__Artemisia;s__Artemisiarutifolia	0	0	0	0	0	0	0	0	0	0	0	0	0	0	0	0	0	0	0	0	0	0	0	0	0	0	0	0	0	0	0	0	0	0	0	0	0	0	0	0	0	0	0	0	0	0	0	0	0
d__Eukaryota;p__Streptophyta;c__Magnoliopsida;o__Asterales;f__Asteraceae;g__Artemisia;s__Artemisiastenocephala	0	0	0	0	0	0	0	0	0	0	0	0	0	0	0	0	0	0	0	0	0	0	0	0	0	0	0	0	0	0	0	0	0	0	0	0	0	0	0	0	0	0	0	0	0	0	0	0	0
d__Eukaryota;p__Streptophyta;c__Magnoliopsida;o__Asterales;f__Asteraceae;g__Aster;s__Asterageratoides	0	0	0	0	0	0	0	0	0	0	0	0	0	0	0	0	0	0	0	0	0	0	0	0	0	0	0	0	0	0	0	0	0	0	0	0	0	0	0	0	0	0	0	0	0	0	0	0	0
d__Eukaryota;p__Streptophyta;c__Magnoliopsida;o__Asterales;f__Asteraceae;g__Aster;s__Asteryomena	0	0	0	0	0	0	0	0	0	0	0	0	0	0	0	0	0	0	0	0	0	0	0	0	0	0	0	0	0	0	0	0	0	0	0	0	0	0	0	0	0	0	0	0	0	0	0	0	0
d__Eukaryota;p__Streptophyta;c__Magnoliopsida;o__Asterales;f__Asteraceae;g__Bidens;s__Bidensmenziesii	0	0	0	0	0	0	0	0	0	0	0	0	0	0	0	0	0	0	0	0	0	0	0	0	0	0	0	0	0	0	0	0	0	0	0	0	0	0	0	0	0	0	0	0	0	0	0	0	0
d__Eukaryota;p__Streptophyta;c__Magnoliopsida;o__Asterales;f__Asteraceae;g__Bidens;s__Bidenssandvicensis	0	0	0	0	0	0	0	0	0	0	0	0	0	0	0	0	0	0	0	0	0	0	0	0	0	0	0	0	0	0	0	0	0	0	0	0	0	0	0	0	0	0	0	0	0	0	0	0	0
d__Eukaryota;p__Streptophyta;c__Magnoliopsida;o__Asterales;f__Asteraceae;g__Bidens;s__Bidenstorta	0	0	0	0	0	0	0	0	0	0	0	0	0	0	0	0	0	0	0	0	0	0	0	0	0	0	0	0	0	0	0	0	0	0	0	0	0	0	0	0	0	0	0	0	0	0	0	0	0
d__Eukaryota;p__Streptophyta;c__Magnoliopsida;o__Asterales;f__Asteraceae;g__Carpesium;s__Carpesiumlipskyi	0	0	0	0	0	0	0	0	0	0	0	0	0	0	0	0	0	0	0	0	0	0	0	0	0	0	0	0	0	0	0	0	0	0	0	0	0	0	0	0	0	0	0	0	0	0	0	0	0
d__Eukaryota;p__Streptophyta;c__Magnoliopsida;o__Asterales;f__Asteraceae;g__Centaurea;s__Centaureazaferii	0	0	0	0	0	0	0	0	0	0	0	0	0	0	0	0	0	0	0	0	0	0	0	0	0	0	0	0	0	0	0	0	0	0	0	0	0	0	0	0	0	0	0	0	0	0	0	0	0
d__Eukaryota;p__Streptophyta;c__Magnoliopsida;o__Asterales;f__Asteraceae;g__Chrysanthemum;s__Chrysanthemumcrassum	0	0	0	0	0	0	0	0	0	0	0	0	0	0	0	0	0	0	0	0	0	0	0	0	0	0	0	0	0	0	0	0	0	0	0	0	0	0	0	0	0	0	0	0	0	0	0	0	0
d__Eukaryota;p__Streptophyta;c__Magnoliopsida;o__Asterales;f__Asteraceae;g__Chrysanthemum;s__Chrysanthemumdichroum	0	0	0	0	0	0	0	0	0	0	0	0	0	0	0	0	0	0	0	0	0	0	0	0	0	0	0	0	0	0	0	0	0	0	0	0	0	0	0	0	0	0	0	0	0	0	0	0	0
d__Eukaryota;p__Streptophyta;c__Magnoliopsida;o__Asterales;f__Asteraceae;g__Cineraria;s__Cinerarialobata	0	0	0	0	0	0	0	0	0	0	0	0	0	0	0	0	0	0	0	0	0	0	0	0	0	0	0	0	0	0	0	0	0	0	0	0	0	0	0	0	0	0	0	0	0	0	0	0	0
d__Eukaryota;p__Streptophyta;c__Magnoliopsida;o__Asterales;f__Asteraceae;g__Cirsium;s__Cirsiumdissectum	0	0	0	0	0	0	0	0	0	0	0	0	0	0	0	0	0	0	0	0	0	0	0	0	0	0	0	0	0	0	0	0	0	0	0	0	0	0	0	0	0	0	0	0	0	0	0	0	0
d__Eukaryota;p__Streptophyta;c__Magnoliopsida;o__Asterales;f__Asteraceae;g__Cirsium;s__Cirsiumfoliosum	0	0	0	0	0	0	0	0	0	0	0	0	0	0	0	0	0	0	0	0	0	0	0	0	0	0	0	0	0	0	0	0	0	0	0	0	0	0	0	0	0	0	0	0	0	0	0	0	0
d__Eukaryota;p__Streptophyta;c__Magnoliopsida;o__Asterales;f__Asteraceae;g__Cirsium;s__Cirsiumjaponicum	0	0	0	0	0	0	0	0	0	0	0	0	0	0	0	0	0	0	0	0	0	0	0	0	0	0	0	0	0	0	0	0	0	0	0	0	0	0	0	0	0	0	0	0	0	0	0	0	0
d__Eukaryota;p__Streptophyta;c__Magnoliopsida;o__Asterales;f__Asteraceae;g__Coreopsis;s__Coreopsismcvaughii	0	0	0	0	0	0	0	0	0	0	0	0	0	0	0	0	0	0	0	0	0	0	0	0	0	0	0	0	0	0	0	0	0	0	0	0	0	0	0	0	0	0	0	0	0	0	0	0	0
d__Eukaryota;p__Streptophyta;c__Magnoliopsida;o__Asterales;f__Asteraceae;g__Dubyaea;s__Dubyaeahispida	0	0	0	0	0	0	0	0	0	0	0	0	0	0	0	0	0	0	0	0	0	0	0	0	0	0	0	0	0	0	0	0	0	0	0	0	0	0	0	0	0	0	0	0	0	0	0	0	0
d__Eukaryota;p__Streptophyta;c__Magnoliopsida;o__Asterales;f__Asteraceae;g__Gaillardia;s__Gaillardiapulchella	0	0	0	0	0	0	0	0	0	0	0	0	0	0	0	0	0	0	0	0	0	0	0	0	0	0	0	0	0	0	0	0	0	0	0	0	0	0	0	0	0	0	0	0	0	0	0	0	0
d__Eukaryota;p__Streptophyta;c__Magnoliopsida;o__Asterales;f__Asteraceae;g__Galinsoga;s__Galinsogaparviflora	0	0	0	0	0	0	0	0	0	0	0	0	0	0	0	0	0	0	0	0	0	0	0	0	0	0	0	0	0	0	0	0	0	0	0	0	0	0	0	0	0	0	0	0	0	0	0	0	0
d__Eukaryota;p__Streptophyta;c__Magnoliopsida;o__Asterales;f__Asteraceae;g__Gerbera;s__Gerberasp.1152	0	0	0	0	0	0	0	0	0	0	0	0	0	0	0	0	0	0	0	0	0	0	0	0	0	0	0	0	0	0	0	0	0	0	0	0	0	0	0	0	0	0	0	0	0	0	0	0	0
d__Eukaryota;p__Streptophyta;c__Magnoliopsida;o__Asterales;f__Asteraceae;g__Heteroplexis;s__Heteroplexismicrocephala	0	0	0	0	0	0	0	0	0	0	0	0	0	0	0	0	0	0	0	0	0	0	0	0	0	0	0	0	0	0	0	0	0	0	0	0	0	0	0	0	0	0	0	0	0	0	0	0	0
d__Eukaryota;p__Streptophyta;c__Magnoliopsida;o__Asterales;f__Asteraceae;g__Hieracium;s__Hieraciumfuscescens	0	0	0	1	0	0	0	0	0	0	0	0	0	0	0	0	0	0	0	0	0	0	0	0	0	0	0	0	0	0	0	0	0	0	0	0	0	0	0	0	0	0	0	0	0	0	0	0	0
d__Eukaryota;p__Streptophyta;c__Magnoliopsida;o__Asterales;f__Asteraceae;g__Hieracium;s__Hieraciumlucidum	0	0	0	0	0	0	0	0	0	0	0	0	0	0	0	0	0	0	0	0	0	0	0	0	0	0	0	0	0	0	0	0	0	0	0	0	0	0	0	0	0	0	0	0	0	0	0	0	0
d__Eukaryota;p__Streptophyta;c__Magnoliopsida;o__Asterales;f__Asteraceae;g__Hieracium;s__Hieraciumstoloniflorum	0	0	0	0	0	0	0	0	0	0	0	0	0	0	0	0	0	0	0	0	0	0	0	0	0	0	0	0	0	0	0	0	0	0	0	0	0	0	0	0	0	0	0	0	0	0	0	0	0
d__Eukaryota;p__Streptophyta;c__Magnoliopsida;o__Asterales;f__Asteraceae;g__Hieracium;s__Hieraciumumbellatum	0	0	0	0	0	0	0	0	0	0	0	0	0	0	0	0	0	0	0	0	0	0	0	0	0	0	0	0	0	0	0	0	0	0	0	0	0	0	0	0	0	0	0	0	0	0	0	0	0
d__Eukaryota;p__Streptophyta;c__Magnoliopsida;o__Asterales;f__Asteraceae;g__Inula;s__Inulaoculus-christi	0	0	0	0	0	0	0	0	0	0	0	0	0	0	0	0	0	0	0	0	0	0	0	0	0	0	0	0	0	0	0	0	0	0	0	0	0	0	0	0	0	0	0	0	0	0	0	0	0
d__Eukaryota;p__Streptophyta;c__Magnoliopsida;o__Asterales;f__Asteraceae;g__Iva;s__Ivaaxillaris	0	0	0	0	0	0	0	0	0	0	0	0	0	0	0	0	0	0	0	0	0	0	0	0	0	0	0	0	0	0	0	0	0	0	0	0	0	0	0	0	0	0	0	0	0	0	0	0	0
d__Eukaryota;p__Streptophyta;c__Magnoliopsida;o__Asterales;f__Asteraceae;g__Jurinea;s__Jurineafrigida	0	0	0	0	0	0	0	0	0	0	0	0	0	0	0	0	0	0	0	0	0	0	0	0	0	0	0	0	0	0	0	0	0	0	0	0	0	0	0	0	0	0	0	0	0	0	0	0	0
d__Eukaryota;p__Streptophyta;c__Magnoliopsida;o__Asterales;f__Asteraceae;g__Launaea;s__Launaeasarmentosa	0	0	0	0	0	0	0	0	0	0	0	0	0	0	0	0	0	0	0	0	0	0	0	0	0	0	0	0	0	0	0	0	0	0	0	0	0	0	0	0	0	0	0	0	0	0	0	0	0
d__Eukaryota;p__Streptophyta;c__Magnoliopsida;o__Asterales;f__Asteraceae;g__Leontodon;s__Leontodonhochstetteri	0	0	0	0	0	0	0	0	0	0	0	0	0	0	0	0	0	0	0	0	0	0	0	0	0	0	0	0	0	0	0	0	0	0	0	0	0	0	0	0	0	0	0	0	0	0	0	0	0
d__Eukaryota;p__Streptophyta;c__Magnoliopsida;o__Asterales;f__Asteraceae;g__Leontodon;s__Leontodonsp.JGMV-2020	0	0	0	0	0	0	0	0	0	0	0	0	0	0	0	0	0	0	0	0	0	0	0	0	0	0	0	0	0	0	0	0	0	0	0	0	0	0	0	0	0	0	0	0	0	0	0	0	0
d__Eukaryota;p__Streptophyta;c__Magnoliopsida;o__Asterales;f__Asteraceae;g__Leptosyne;s__Leptosynegigantea	0	0	0	0	0	0	0	0	0	0	0	0	0	0	0	0	0	0	0	0	0	0	0	0	0	0	0	0	0	0	0	0	0	0	0	0	0	0	0	0	0	0	0	0	0	0	0	0	0
d__Eukaryota;p__Streptophyta;c__Magnoliopsida;o__Asterales;f__Asteraceae;g__Leucanthemum;s__Leucanthemumrotundifolium	0	0	0	0	0	0	0	0	0	0	0	0	0	0	0	0	0	0	0	0	0	0	0	0	0	0	0	0	0	0	0	0	0	0	0	0	0	0	0	0	0	0	0	0	0	0	0	0	0
d__Eukaryota;p__Streptophyta;c__Magnoliopsida;o__Asterales;f__Asteraceae;g__Madia;s__Madiasativa	0	0	0	0	0	0	0	0	0	0	0	0	0	0	0	0	0	0	0	0	0	0	0	0	0	0	0	0	0	0	0	0	0	0	0	0	0	0	0	0	0	0	0	0	0	0	0	0	0
d__Eukaryota;p__Streptophyta;c__Magnoliopsida;o__Asterales;f__Asteraceae;g__Matricaria;s__Matricariabreviradiata	0	0	0	0	0	0	0	0	0	0	0	0	0	0	0	0	0	0	0	0	0	0	0	0	0	0	0	0	0	0	0	0	0	0	0	0	0	0	0	0	0	0	0	0	0	0	0	0	0
d__Eukaryota;p__Streptophyta;c__Magnoliopsida;o__Asterales;f__Asteraceae;g__Mauranthemum;s__Mauranthemumdecipiens	0	0	0	0	0	0	0	0	0	0	0	0	0	0	0	0	0	0	0	0	0	0	0	0	0	0	0	0	0	0	0	0	0	0	0	0	0	0	0	0	0	0	0	0	0	0	0	0	0
d__Eukaryota;p__Streptophyta;c__Magnoliopsida;o__Asterales;f__Asteraceae;g__Melampodium;s__Melampodiumdivaricatum	0	0	0	0	0	0	0	0	0	0	0	0	0	0	0	0	0	0	0	0	0	0	0	0	0	0	0	0	0	0	0	0	0	0	0	0	0	0	0	0	0	0	0	0	0	0	0	0	0
d__Eukaryota;p__Streptophyta;c__Magnoliopsida;o__Asterales;f__Asteraceae;g__Oncosiphon;s__Oncosiphonintermedius	0	0	0	0	0	0	0	0	0	0	0	0	0	0	0	0	0	0	0	0	0	0	0	0	0	0	0	0	0	0	0	0	0	0	0	0	0	0	0	0	0	0	0	0	0	0	0	0	0
d__Eukaryota;p__Streptophyta;c__Magnoliopsida;o__Asterales;f__Asteraceae;g__Packera;s__Packeraplattensis	0	0	0	0	0	0	0	0	0	0	0	0	0	0	0	0	0	0	0	0	0	0	0	0	0	0	0	0	0	0	0	0	0	0	0	0	0	0	0	0	0	0	0	0	0	0	0	0	0
d__Eukaryota;p__Streptophyta;c__Magnoliopsida;o__Asterales;f__Asteraceae;g__Pentzia;s__Pentziaglobosa	0	0	0	0	0	0	0	0	0	0	0	0	0	0	0	0	0	0	0	0	0	0	0	0	0	0	0	0	0	0	0	0	0	0	0	0	0	0	0	0	0	0	0	0	0	0	0	0	0
d__Eukaryota;p__Streptophyta;c__Magnoliopsida;o__Asterales;f__Asteraceae;g__Pentzia;s__Pentzialanata	0	0	0	0	0	0	0	0	0	0	0	0	0	0	0	0	0	0	0	0	0	0	0	0	0	0	0	0	0	0	0	0	0	0	0	0	0	0	0	0	0	0	0	0	0	0	0	0	0
d__Eukaryota;p__Streptophyta;c__Magnoliopsida;o__Asterales;f__Asteraceae;g__Pilosella;s__Pilosellaofficinarum	0	0	0	0	0	0	0	0	0	0	0	0	0	0	0	0	0	0	0	0	0	0	0	0	0	0	0	0	0	0	0	0	0	0	0	0	0	0	0	0	0	0	0	0	0	0	0	0	0
d__Eukaryota;p__Streptophyta;c__Magnoliopsida;o__Asterales;f__Asteraceae;g__Rhagadiolus;s__Rhagadiolusstellatus	0	0	0	0	0	0	0	0	0	0	0	0	0	0	0	0	0	0	0	0	0	0	0	0	0	0	0	0	0	0	0	0	0	0	0	0	0	0	0	0	0	0	0	0	0	0	0	0	0
d__Eukaryota;p__Streptophyta;c__Magnoliopsida;o__Asterales;f__Asteraceae;g__Rhanteriopsis;s__Rhanteriopsispuberula	0	0	0	0	0	0	0	0	0	0	0	0	0	0	0	0	0	0	0	0	0	0	0	0	0	0	0	0	0	0	0	0	0	0	0	0	0	0	0	0	0	0	0	0	0	0	0	0	0
d__Eukaryota;p__Streptophyta;c__Magnoliopsida;o__Asterales;f__Asteraceae;g__Rhodanthemum;s__Rhodanthemumdepressum	0	0	0	0	0	0	0	0	0	0	0	0	0	0	0	0	0	0	0	0	0	0	0	0	0	0	0	0	0	0	0	0	0	0	0	0	0	0	0	0	0	0	0	0	0	0	0	0	0
d__Eukaryota;p__Streptophyta;c__Magnoliopsida;o__Asterales;f__Asteraceae;g__Rhodanthemum;s__Rhodanthemumgayanum	0	0	0	0	0	0	0	0	0	0	0	0	0	0	0	0	0	0	0	0	0	0	0	0	0	0	0	0	0	0	0	0	0	0	0	0	0	0	0	0	0	0	0	0	0	0	0	0	0
d__Eukaryota;p__Streptophyta;c__Magnoliopsida;o__Asterales;f__Asteraceae;g__Saussurea;s__Saussureamutabilis	0	0	0	0	0	0	0	0	0	0	0	0	0	0	0	0	0	0	0	0	0	0	0	0	0	0	0	0	0	0	0	0	0	0	0	0	0	0	0	0	0	0	0	0	0	0	0	0	0
d__Eukaryota;p__Streptophyta;c__Magnoliopsida;o__Asterales;f__Asteraceae;g__Silybum;s__Silybummarianum	0	0	0	0	0	0	0	0	0	0	0	0	0	0	0	0	0	0	0	0	0	0	0	0	0	0	0	0	0	0	0	0	0	0	0	0	0	0	0	0	0	0	0	0	0	0	0	0	0
d__Eukaryota;p__Streptophyta;c__Magnoliopsida;o__Asterales;f__Asteraceae;g__Sinosenecio;s__Sinoseneciosubcoriaceus	0	0	0	0	0	0	0	0	0	0	0	0	0	0	0	0	0	0	0	0	0	0	0	0	0	0	0	0	0	0	0	0	0	0	0	0	0	0	0	0	0	0	0	0	0	0	0	0	0
d__Eukaryota;p__Streptophyta;c__Magnoliopsida;o__Asterales;f__Asteraceae;g__Soliva;s__Solivasessilis	0	0	0	0	0	0	0	0	0	0	0	0	0	0	0	0	0	0	0	0	0	0	0	0	0	0	0	0	0	0	0	0	0	0	0	0	0	0	0	0	0	0	0	0	0	0	0	0	0
d__Eukaryota;p__Streptophyta;c__Magnoliopsida;o__Asterales;f__Asteraceae;g__Taraxacum;s__Taraxacumalaskanum	0	0	0	0	0	0	0	0	0	0	0	0	0	0	0	0	0	0	0	0	0	0	0	0	0	0	0	0	0	0	0	0	0	0	0	0	0	0	0	0	0	0	0	0	0	0	0	0	0
d__Eukaryota;p__Streptophyta;c__Magnoliopsida;o__Asterales;f__Asteraceae;g__Verbesina;s__Verbesinasp.Ferreira323	0	0	0	0	0	0	0	0	0	0	0	0	0	0	0	0	0	0	0	0	0	0	0	0	0	0	0	0	0	0	0	0	0	0	0	0	0	0	0	0	0	0	0	0	0	0	0	0	0
d__Eukaryota;p__Streptophyta;c__Magnoliopsida;o__Asterales;f__Asteraceae;g__Youngia;s__Youngiaheterophylla	0	0	0	0	0	0	0	0	0	0	0	0	0	0	0	0	0	1	0	0	0	0	0	0	0	0	0	0	0	0	0	0	0	0	0	0	0	0	0	0	0	0	0	0	0	0	0	0	0
d__Eukaryota;p__Streptophyta;c__Magnoliopsida;o__Asterales;f__Asteraceae;g__Youngia;s__Youngiarubida	0	0	0	0	0	0	0	0	0	0	0	0	0	0	1	0	0	0	0	0	0	0	0	0	0	0	0	0	0	0	0	0	0	0	0	0	0	0	0	0	0	0	0	0	0	0	0	0	0
d__Eukaryota;p__Streptophyta;c__Magnoliopsida;o__Boraginales;f__Boraginaceae;g__Oreocarya;s__Oreocaryanubigena	0	0	0	0	0	0	0	0	0	0	0	0	0	0	0	0	0	0	0	0	0	0	0	0	0	0	0	0	0	0	0	0	0	0	0	0	0	0	0	0	0	0	0	0	0	0	0	0	0
d__Eukaryota;p__Streptophyta;c__Magnoliopsida;o__Brassicales;f__Brassicaceae;g__Camelina;s__Camelinahispida	0	0	0	0	0	0	0	0	0	0	0	0	0	0	0	0	0	0	0	0	0	0	0	0	0	0	0	0	0	0	0	0	0	0	0	0	0	0	0	0	0	0	0	0	0	0	0	0	0
d__Eukaryota;p__Streptophyta;c__Magnoliopsida;o__Brassicales;f__Brassicaceae;g__Cardamine;s__Cardamineleucantha	0	0	0	0	0	0	0	0	0	0	0	0	0	0	0	0	0	0	0	0	0	0	0	0	0	0	0	0	0	0	0	0	0	0	0	0	0	0	0	0	0	0	0	0	0	0	0	0	0
d__Eukaryota;p__Streptophyta;c__Magnoliopsida;o__Brassicales;f__Brassicaceae;g__Mathewsia;s__Mathewsiaauriculata	0	0	0	0	0	0	0	0	0	0	0	0	0	0	0	0	0	0	0	0	0	0	0	0	0	0	0	0	0	0	0	0	0	0	0	0	0	0	0	0	0	0	0	0	0	0	0	0	0
d__Eukaryota;p__Streptophyta;c__Magnoliopsida;o__Brassicales;f__Brassicaceae;g__Odontarrhena;s__Odontarrhenasamarifera	0	0	0	0	0	0	0	0	0	0	0	0	0	0	0	0	1	0	0	0	0	0	0	0	0	0	0	0	0	0	0	0	0	0	0	0	0	0	0	0	0	0	0	0	0	0	0	0	0
d__Eukaryota;p__Streptophyta;c__Magnoliopsida;o__Brassicales;f__Brassicaceae;g__Polyctenium;s__Polycteniumfremontii	0	0	0	0	0	0	0	0	0	0	0	0	0	0	0	0	0	0	0	0	0	0	0	0	0	0	0	0	0	0	0	0	0	0	0	0	0	0	0	0	0	0	0	0	0	0	0	0	0
d__Eukaryota;p__Streptophyta;c__Magnoliopsida;o__Brassicales;f__Brassicaceae;g__Sibara;s__Sibaraanethifolia	0	0	0	0	0	0	0	0	0	0	0	0	0	0	0	0	0	0	0	0	0	0	0	0	0	0	0	0	0	0	0	0	0	0	0	0	0	0	0	0	0	0	0	0	0	0	0	0	0
d__Eukaryota;p__Streptophyta;c__Magnoliopsida;o__Brassicales;f__Brassicaceae;g__Streptanthus;s__Streptanthusbarbiger	0	0	0	0	0	0	0	0	0	0	0	0	0	0	0	0	0	0	0	0	0	0	0	0	0	0	0	0	0	0	0	0	0	0	0	0	0	0	0	0	0	0	0	0	0	0	0	0	0
d__Eukaryota;p__Streptophyta;c__Magnoliopsida;o__Brassicales;f__Brassicaceae;g__Thelypodium;s__Thelypodiumlaciniatum	0	0	0	0	0	0	0	0	0	0	1	0	0	0	0	0	0	0	0	0	0	0	0	0	0	0	0	0	0	0	0	0	0	0	0	0	0	0	0	0	0	0	0	0	0	0	0	0	0
d__Eukaryota;p__Streptophyta;c__Magnoliopsida;o__Caryophyllales;f__Cactaceae;g__Stenocereus;s__Stenocereusstellatus	0	0	0	0	0	0	0	0	0	0	0	0	0	0	0	0	0	0	0	0	0	0	0	0	0	0	0	0	0	0	0	0	0	0	0	0	0	0	0	0	0	0	0	0	0	0	0	0	0
d__Eukaryota;p__Streptophyta;c__Magnoliopsida;o__Caryophyllales;f__Caryophyllaceae;g__Dianthus;s__Dianthusgredensis	0	0	0	0	0	0	0	0	0	0	0	0	0	0	0	0	0	0	0	0	0	0	0	0	0	0	0	0	0	0	0	0	0	0	0	0	0	0	0	0	0	0	0	0	0	0	0	0	0
d__Eukaryota;p__Streptophyta;c__Magnoliopsida;o__Caryophyllales;f__Caryophyllaceae;g__Eremogone;s__Eremogonejuncea	0	0	0	0	0	0	0	0	0	0	0	0	0	0	0	0	0	0	0	0	0	0	0	0	0	0	0	0	0	0	0	0	0	0	0	0	0	0	0	0	0	0	0	0	0	0	0	0	0
d__Eukaryota;p__Streptophyta;c__Magnoliopsida;o__Caryophyllales;f__Caryophyllaceae;g__Gypsophila;s__Gypsophilaaltissima	0	0	0	0	0	0	0	0	0	0	0	0	0	0	0	0	0	0	0	0	0	0	0	0	0	0	0	0	0	0	0	0	0	0	0	0	0	0	0	0	0	0	0	0	0	0	0	0	0
d__Eukaryota;p__Streptophyta;c__Magnoliopsida;o__Caryophyllales;f__Caryophyllaceae;g__Gypsophila;s__Gypsophilacephalotes	0	0	0	0	0	0	0	0	0	0	0	0	0	0	0	0	0	0	0	0	0	0	0	0	0	0	0	0	0	0	0	0	0	0	0	0	0	0	0	0	0	0	0	0	0	0	0	0	0
d__Eukaryota;p__Streptophyta;c__Magnoliopsida;o__Caryophyllales;f__Caryophyllaceae;g__Silene;s__Sileneroemeri	0	0	0	0	0	0	0	0	0	0	0	0	0	0	0	0	0	0	0	0	0	0	0	0	0	0	0	0	0	0	0	0	0	0	0	0	0	0	0	0	0	0	0	0	0	0	0	0	0
d__Eukaryota;p__Streptophyta;c__Magnoliopsida;o__Caryophyllales;f__Caryophyllaceae;g__Silene;s__Silenesojakii	0	0	0	0	0	0	0	0	0	0	0	0	0	0	0	0	0	0	0	0	0	0	0	0	0	0	0	0	0	0	0	0	0	0	0	0	0	0	0	0	0	0	0	0	0	0	0	0	0
d__Eukaryota;p__Streptophyta;c__Magnoliopsida;o__Caryophyllales;f__Chenopodiaceae;g__Bassia;s__Bassiaeriantha	0	0	0	0	0	0	0	0	0	0	0	0	0	0	0	0	0	0	0	0	0	0	0	0	0	0	0	0	0	0	0	0	0	0	0	0	0	0	0	0	0	0	0	0	0	0	0	0	0
d__Eukaryota;p__Streptophyta;c__Magnoliopsida;o__Caryophyllales;f__Chenopodiaceae;g__Bassia;s__Bassiapilosa	0	0	0	0	0	0	0	0	0	0	0	0	0	0	0	0	0	0	0	0	0	0	0	0	0	0	0	0	0	0	0	0	0	0	0	0	0	0	0	0	0	0	0	0	0	0	0	0	0
d__Eukaryota;p__Streptophyta;c__Magnoliopsida;o__Caryophyllales;f__Chenopodiaceae;g__Bassia;s__Bassiaprostrata	0	0	0	0	0	0	0	0	0	0	0	0	0	0	0	0	0	0	0	0	0	0	0	0	0	0	0	0	0	0	0	0	0	0	0	0	0	0	0	0	0	0	0	0	0	0	0	0	0
d__Eukaryota;p__Streptophyta;c__Magnoliopsida;o__Caryophyllales;f__Chenopodiaceae;g__Bassia;s__Bassiasalsoloides	0	0	0	0	0	0	0	0	0	0	0	0	0	0	0	0	0	0	0	0	0	0	0	0	0	0	0	0	0	0	0	0	0	0	0	0	0	0	0	0	0	0	0	0	0	0	0	0	0
d__Eukaryota;p__Streptophyta;c__Magnoliopsida;o__Caryophyllales;f__Chenopodiaceae;g__Bassia;s__Bassiatomentosa	0	0	0	0	0	0	0	0	0	0	0	0	0	0	0	0	0	0	0	0	0	0	0	0	0	0	0	0	0	0	0	0	0	0	0	0	0	0	0	0	0	0	0	0	0	0	0	0	0
d__Eukaryota;p__Streptophyta;c__Magnoliopsida;o__Caryophyllales;f__Chenopodiaceae;g__Chenopodium;s__Chenopodiumsp.'luteo-rufi'	0	0	0	0	0	0	0	0	0	0	0	0	0	0	0	0	0	0	0	0	0	0	0	0	0	0	0	0	0	0	0	0	0	0	0	0	0	0	0	0	0	0	0	0	0	0	0	0	0
d__Eukaryota;p__Streptophyta;c__Magnoliopsida;o__Caryophyllales;f__Chenopodiaceae;g__Enchylaena;s__Enchylaenatomentosa	0	0	0	0	0	0	0	0	0	0	0	0	0	0	0	0	0	0	0	0	0	0	0	0	0	0	0	0	0	0	0	0	0	0	0	0	0	0	0	0	0	0	0	0	0	0	0	0	0
d__Eukaryota;p__Streptophyta;c__Magnoliopsida;o__Caryophyllales;f__Chenopodiaceae;g__Halimione;s__Halimioneportulacoides	0	0	0	0	0	0	0	0	0	0	0	0	0	0	0	0	0	0	0	0	0	0	0	0	0	0	0	0	0	0	0	0	0	0	0	0	0	0	0	0	0	0	0	0	0	0	0	0	0
d__Eukaryota;p__Streptophyta;c__Magnoliopsida;o__Caryophyllales;f__Chenopodiaceae;g__Kali;s__Kaliturgidum	0	0	0	0	0	0	0	0	0	0	0	0	0	0	0	0	0	0	0	0	0	0	0	0	0	0	0	0	0	0	0	0	0	0	0	0	0	0	0	0	0	0	0	0	0	0	0	0	0
d__Eukaryota;p__Streptophyta;c__Magnoliopsida;o__Caryophyllales;f__Chenopodiaceae;g__Krascheninnikovia;s__Krascheninnikoviaceratoides	0	0	0	0	0	0	0	0	0	0	0	0	0	0	0	0	0	0	0	0	0	0	0	0	0	0	0	0	0	0	0	0	0	0	0	0	0	0	0	0	0	0	0	0	0	0	0	0	0
d__Eukaryota;p__Streptophyta;c__Magnoliopsida;o__Caryophyllales;f__Chenopodiaceae;g__Maireana;s__Maireanapolypterygia	0	0	0	0	0	0	0	0	0	0	0	0	0	0	0	0	0	0	0	0	0	0	0	0	0	0	0	0	0	0	0	0	0	0	0	0	0	0	0	0	0	0	0	0	0	0	0	0	0
d__Eukaryota;p__Streptophyta;c__Magnoliopsida;o__Caryophyllales;f__Chenopodiaceae;g__Suaeda;s__Suaedaaegyptiaca	0	0	0	0	0	0	0	0	0	0	0	0	0	0	0	0	0	0	0	0	0	0	0	0	0	0	0	0	0	0	0	0	0	0	0	0	0	0	0	0	0	0	0	0	0	0	0	0	0
d__Eukaryota;p__Streptophyta;c__Magnoliopsida;o__Caryophyllales;f__Plumbaginaceae;g__Limonium;s__Limoniumotolepis	0	0	0	0	0	0	0	0	0	0	0	0	0	0	0	0	0	0	0	0	0	0	0	0	0	0	0	0	0	0	0	0	0	0	0	0	0	0	0	0	0	0	0	0	0	0	0	0	0
d__Eukaryota;p__Streptophyta;c__Magnoliopsida;o__Caryophyllales;f__Polygonaceae;g__Fagopyrum;s__Fagopyrumtataricum	0	0	0	0	0	0	0	0	0	0	0	0	0	0	0	0	0	0	0	0	0	0	0	0	0	0	0	0	0	0	0	0	0	0	0	0	0	0	0	0	0	0	0	0	0	0	0	0	0
d__Eukaryota;p__Streptophyta;c__Magnoliopsida;o__Caryophyllales;f__Polygonaceae;g__Persicaria;s__Persicariahydropiper	0	0	0	0	0	0	0	0	0	0	0	0	0	0	0	0	0	0	0	0	0	0	0	0	0	0	0	0	0	0	0	0	0	0	0	0	0	0	0	0	0	0	0	0	0	0	0	0	0
d__Eukaryota;p__Streptophyta;c__Magnoliopsida;o__Caryophyllales;f__Polygonaceae;g__Polygonum;s__Polygonumfilicaule	0	0	0	0	0	0	0	0	0	0	0	0	0	0	0	0	0	0	0	0	0	0	0	0	0	0	0	0	0	0	0	0	0	0	0	0	0	0	0	0	0	0	0	0	0	0	0	0	0
d__Eukaryota;p__Streptophyta;c__Magnoliopsida;o__Celastrales;f__Celastraceae;g__Euonymus;s__Euonymusalatus	0	0	0	0	0	0	0	0	0	0	0	0	0	0	0	0	0	0	0	0	0	0	0	0	0	0	0	0	0	0	0	0	0	0	0	0	0	0	0	0	0	0	0	0	0	0	0	0	0
d__Eukaryota;p__Streptophyta;c__Magnoliopsida;o__Solanales;f__Solanaceae;g__Deprea;s__Depreasteyermarkii	0	0	0	0	0	0	0	0	0	0	0	0	0	0	0	0	0	0	0	0	0	0	0	0	0	0	0	0	0	0	0	0	0	0	0	0	0	0	0	0	0	0	0	0	0	0	0	0	0
[truncated: 568 more columns]
